# Supplementary material for: Rbfox1 is required for myofibril development and maintaining fiber type–specific isoform expression in Drosophila muscles
Source: Life Sci Alliance. 2022 Jan 7;5(4):e202101342. doi: 10.26508/lsa.202101342 (PMC8742874; doi:10.26508/lsa.202101342)
Supplement: Supplementary file 1 [file LSA-2021-01342_SdataF1.xlsx]

## Sheet: Fig1
Raw data used to generate plots
Figure panel
1G		Rbfox1 Norm. Counts (FBgn0052062)
	Myoblast	8908.91	7384.85	8933.61
	16h APF	26421.6	10476	15468.7
	24h APF	9105.98	7546.76	9372.07
	30h APF	5291.51	5052.17
	48h APF	5665.95	6283.89	5975.26
	72h APF	8069.24	13823.5
	90h APF	13275.2	13733.5
	1d adult	10795.4	9889.98
1H		Rbfox1 Norm. Counts (FBgn0052062)
	IFM	3462.97	2375.42
	TDT	4450.27	6496.76
	leg	1987.2	2011.94
