# Supplementary material for: Rbfox1 is required for myofibril development and maintaining fiber type–specific isoform expression in Drosophila muscles
Source: Life Sci Alliance. 2022 Jan 7;5(4):e202101342. doi: 10.26508/lsa.202101342 (PMC8742874; doi:10.26508/lsa.202101342)
Supplement: Supplementary file 5 [file LSA-2021-01342_SdataF3.xlsx]

## Sheet: Fig3
Raw data used to generate plots
Figure panel
3B		Flightless	Weak	Fliers
	w-x27286	5	0	95
	w- xKK101518	2.98507	2.98507	94.0299
	Act5cxw-	0	15	85
	Act5cx27286	90	8.33333	1.66667
	Act5cxKK101518	0	0	0
	Mef2G4xw-	0	6.66667	93.3333
	Mef2G4x27286	95.283	1.88679	2.83019
	Mef2G4xKK101518	0	0	0
	Dcr2,Mef2G4xw- male	5.45455	5.45455	89.0909
	Dcr2,Mef2G4xw- female	23.3333	13.3333	63.3333
	Dcr2,Mef2G4x27286 female	100	0	0
	Act88FG4xw-	51.6667	6.66667	41.6667
	Act88FG4x27286	5	5	90
	Act88FG4xKK101518	46.6667	26.6667	26.6667
3F		Attached	Torn	Detached
	Mef2G4xw-1d	97.5	0	2.5
	Mef2x27286	79.3103	13.7931	6.89655
	Dcr2,Mef2xw-	98.1818	1.81818	0
	Dcr2,Mef2x27286	15	37.5	47.5
	Mef2G4xw- 90h	100	0	0
	Mef2xKK101518	37.7778	13.3333	48.8889
	Act88Fxw-	96.9388	3.06122	0
	Act88FxKK101518	52.5	25	22.5
3G	1dMef2xw-	2.9318	2.9318	2.9318	2.9318	2.9318	3.1983	3.1983	3.1983	3.1983	3.1983	3.1983	3.1983	3.1983	3.1983	3.1983	3.1983	3.1983	3.1983	3.1983	3.1983	3.1983	3.1983	3.1983	3.1983	3.1983	3.1983	3.5182	3.5182	3.5182	3.5182	3.5182	3.5182	3.5182	3.5182	3.5182	3.5182	3.5182	3.5182	3.5182	3.5182	3.5182	3.5182	3.5182	3.5182	3.5182	3.5182	3.5182	3.5182
	1dMef2x27286	2.4432	2.5869	2.5869	2.5869	2.7063	2.7063	2.7063	2.7063	2.7486	2.7486	2.7486	2.7486	2.7486	2.7486	2.7486	2.7486	2.9318	2.9318	2.9318	2.9318	2.9318	2.9318	2.9318	2.9318	2.9318	2.9318	2.9318	2.9318	3.1412	3.1412	3.1412	3.1412	3.1983	3.1983	3.1983	3.1983	3.1983	3.1983	3.1983	3.1983	3.1983	3.1983	3.1983	3.1983	3.1983	3.1983	3.1983	3.1983
	90Mef2_w-	2.706	2.706	2.706	3.198	2.932	2.932	2.932	2.932	2.932	2.932	2.706	2.706	2.706	3.198	3.198	3.198	2.932	2.932	2.932	3.198	3.198	2.932	2.932	2.932	2.932	2.932	2.932	2.932	2.932	2.932	2.932	2.345	2.345	2.345	2.706	2.706	2.706
	90Mef2_KK101518	2.513			2.513	2.513	2.513	2.706	2.706	2.706	2.706	2.706	2.932	2.932	2.932	2.932	2.932	2.932	3.198	3.198	3.198	3.198
	1dDcr2,Mef2_w-	3.542	3.401	3.401	3.27	3.27	3.27	3.27	3.149	3.149	3.149	3.149	3.542	3.542	3.542	3.542	3.542	3.401	3.401	3.542	3.401	3.401	2.9318	2.9318	3.5182	3.5182	3.5182	3.5182	3.5182	3.5182	3.5182	3.5182	3.5182	3.5182	3.5182	3.5182	3.5182	3.5182	3.5182	3.5182	3.5182	3.5182	3.5182	3.5182	3.5182	3.5182	3.5182	3.5182	3.5182
	1dDcr2,Mef2_27286	2.513	2.7063	2.7063	2.7063	2.7063	2.7063	2.9318	2.9318	2.9318	2.9318	2.9318	3.1983	3.1983	3.1983	3.1983	3.1983	3.1983	3.1983	3.5182	3.5182	3.5182	3.5182	3.5182	3.574	3.575	3.368	3.095	3.063	3.608	3.642	3.436	3.161	3.161	3.3	3.299	3.3	3.231	3.298	3.333	3.264	2.99	2.921	2.994	3.093	2.991	3.06	2.887	3.061
	1dAct88F_w-	3.401	3.542	3.542	3.542	3.149	3.149	3.149	3.542	3.542	3.542	3.542	3.542	3.542	3.542	3.542	3.542	3.696	3.542	3.542	3.542	3.401	3.401	3.401	2.743	2.834	2.834	2.834	3.542	3.542	3.542	3.401	3.401	3.401	3.401	3.542	3.542	3.542	3.401	3.401	3.542	3.542	3.542	3.542	3.401	3.542	3.542	3.542	3.542
	1dAct88F_KK101518	2.932	3.198	3.198	3.198	3.198	3.198	3.518	3.518	3.518	3.518	3.518	3.518	3.518	3.518	3.518	3.518	3.518	3.518	3.518	3.518	3.518	3.518	3.518	3.909	3.909	3.909
3H	1dMef2xw-	0.9276	0.9276	0.9964	0.9964	1.0307	1.0307	1.0307	1.0307	1.0651	1.0651	1.0651	1.0651	1.0651	1.0651	1.0994	1.0994	1.0994	1.0994	1.0994	1.0994	1.1338	1.1338	1.1338	1.1338	1.1338	1.1681	1.1681	1.1681	1.1681	1.1681	1.2025	1.2025	1.2025	1.2025	1.2025	1.2025	1.2369	1.2369	1.2369	1.2369	1.2369	1.2712	1.2712	1.2712	1.2712	1.2712	1.2712	1.2712
	1dMef2x27286	1.0651	1.066	1.07	1.0737	1.1338	1.1338	1.147	1.1681	1.2025	1.2025	1.203	1.2454	1.2454	1.248	1.271	1.2712	1.2884	1.2884	1.2884	1.3056	1.3056	1.331	1.332	1.3399	1.3399	1.3743	1.3743	1.375	1.4086	1.4086	1.409	1.409	1.417	1.417	1.4172	1.418	1.418	1.443	1.443	1.443	1.443	1.443	1.443	1.4774	1.4774	1.478	1.503	1.503
	90hMef2_w-	0.825	0.859	0.893	0.893	0.893	0.893	0.893	0.928	0.928	0.928	0.928	0.928	0.928	0.928	0.928	0.928	0.962	0.962	0.962	0.962	0.962	0.996	0.996	0.996	0.996	0.996	1.031	1.031	1.031	1.031	1.031	1.031	1.065	1.065	1.099	1.099	1.099	1.134	1.168
	90hMef2_KK101518	0.825	0.893	0.893	0.928	0.928	0.996	0.996	1.031	1.031	1.031	1.065	1.065	1.099	1.099	1.099	1.099	1.134	1.134	1.134	1.168	1.168	1.168	1.168	1.168	1.202	1.202	1.271
	1dDcr2,Mef2_w-	0.936	1.241	1.243	1.1	1.103	1.09	1.065	1.15	1.167	1.289	1.23	1.276	1.225	1.187	1.199	1.202	1.176	1.222	1.189	1.181	1.113	0.9964	0.9964	1.0307	1.0307	1.0307	1.0307	1.0307	1.0307	1.0651	1.0651	1.0994	1.1338	1.1338	1.1681	1.1681	1.2025	1.2025	1.2369	1.2369	1.3399	1.443	0.8246	0.8589
	1dDcr2,Mef2_27286	0.481	0.481	0.481	0.481	0.5154	0.5154	0.5154	0.5154	0.5154	0.517	0.5497	0.5841	0.5841	0.5841	0.5841	0.6184	0.6184	0.6184	0.6184	0.6184	0.6184	0.619	0.6528	0.654	0.687	0.687	0.6871	0.688	0.688	0.721	0.721	0.7215	0.7215	0.7215	0.722	0.7559	0.7559	0.756	0.756	0.757	0.757	0.79	0.79	0.7902	0.7902	0.791	0.791	0.793
	1dAct88F_w-	0.996	0.996	0.996	0.996	0.996	1.079	1.079	1.079	1.079	1.079	1.079	1.079	1.079	1.079	1.079	1.079	1.079	1.079	1.079	1.079	1.079	1.079	1.079	1.079	1.162	1.162	1.162	1.162	1.162	1.162	1.162	1.245	1.245	1.245	1.245	1.245	1.245	1.245	1.245	1.245	1.245	1.245	1.245	1.245	1.328	1.328	1.328	1.328
	1dAct88F_KK101518	0.756	0.79	0.79	0.79	0.893	0.893	0.893	0.928	0.962	0.996	0.996	1.031	1.031	1.031	1.065	1.065	1.099	1.099	1.134	1.134	1.134	1.134	1.168	1.168	1.202	1.202	1.237	1.237	1.271	1.271	1.306	1.306	1.306	1.34	1.34	1.374	1.443
[truncated: 147 more columns]
