# Supplementary material for: Rbfox1 is required for myofibril development and maintaining fiber type–specific isoform expression in Drosophila muscles
Source: Life Sci Alliance. 2022 Jan 7;5(4):e202101342. doi: 10.26508/lsa.202101342 (PMC8742874; doi:10.26508/lsa.202101342)
Supplement: Supplementary file 7 [file LSA-2021-01342_TableS1.xlsx]

## Sheet: guide
Table S1 Spreadsheet Tabs. This spreadsheet contains several tables of data for genes that contain Rbfox1 or Bru1 binding motif instances in the Drosophila genome, including the raw output from PWMScan and oRNAment. We provide a table of the coordinates of all motifs in introns, 5′-UTR or 3′-UTR regions, and CDS regions. We also provide membership for each gene in the lists of genes examined in F…
Tab Name	Corresponding Figure Panels	Description
PWMs	Figure S3, S4	position weight matrixes obtained from oRNAment supplemental materials for Rbfox1 and Bru1, used for PWMScan analysis
raw_oRNAment_Rbfox1	Figure S3, S4	raw data downloaded from oRNAment for Rbfox1 binding sites in transcriptome, matched to gene names (http://rnabiology.ircm.qc.ca/oRNAment)
oRNAment_genelists	Figure S3, S4	data from oRNAment with TRUE/FALSE columns to denote if event is in CDS, 5'UTR or 3'UTR regions. Additional TRUE/FALSE columns mark genes/events which belong in a category of interest, including RBPs (RNA binding proteins), TMs (transmembrane proteins), TFs (transcription factors), SPs (sarcomere proteins), RNAipheno (muscle phenotype genes) or corefibrillar (fibrillar genes)
raw_pwmscan_dm6_Rbfox1	Figure S3, S4	raw data output from PWMScan with input Rbfox1 binding position weight matrix from PWMs tab (https://ccg.epfl.ch/pwmscan/)
PWMScan_genelists	Figure S3, S4	data from PWMScan with TRUE/FALSE columns to denote if event is in introns, exons, CDS, 5'UTR or 3'UTR regions. Additional TRUE/FALSE columns mark genes/events which belong in a category of interest, including RBPs (RNA binding proteins), TMs (transmembrane proteins), TFs (transcription factors), SPs (sarcomere proteins), RNAipheno (muscle phenotype genes) or corefibrillar (fibrillar genes)
raw_oRNAment_Bru1	Figure S3, S4	raw data downloaded from oRNAment for Bru1 binding sites in transcriptome, matched to gene names (http://rnabiology.ircm.qc.ca/oRNAment)

## Sheet: PWMs
>Dm a2bp1 Rbfox1 oRNAment007
0.312097	0.0517476	0.0517476	0.584408
0.00421845	0.00421845	0.987345	0.00421845
0.00421845	0.987345	0.00421845	0.00421845
0.987345	0.00421845	0.00421845	0.00421845
0.00421845	0.00421845	0.00421845	0.987345
0.00421845	0.00421845	0.987345	0.00421845
0.313688	0.481445	0.102434	0.102434
>Dm aret1 bru1 oRNAment 010
0.0983441	0.0983441	0.0983441	0.704968
0.00457897	0.00457897	0.711887	0.278955
0.00457897	0.00457897	0.186046	0.804796
0.00457897	0.00457897	0.734631	0.256211
0.00457897	0.00457897	0.00457897	0.986263
0.00457897	0.00457897	0.822769	0.168073
0.028543	0.028543	0.116051	0.826863
>Dm aret2 bru1 oRNAment 011
0.0520167	0.0520167	0.0520167	0.84395
0.102806	0.00655911	0.588242	0.302393
0.00655911	0.00655911	0.00655911	0.980323
0.153198	0.00655911	0.697364	0.142878
0.00655911	0.00655911	0.00655911	0.980323
0.00655911	0.00655911	0.895835	0.0910466
0.0307071	0.0307071	0.0307071	0.907879

## Sheet: raw_oRNAment_Rbfox1
ensembl_gene_id_INT	ensembl_transcript_id_INT	gene_biotype	transcript_biotype	transcript_position	RBP	score	unpaired_probability	chromosome	region	exon_start	exon_end	ensembl_transcript_id	ensembl_gene_id	external_gene_name
11286	88638	1	1	5295	7	1	0.00148562	chr2R	C;C	8873980	8873986	FBtr0088638	FBgn0011286	RyR
11286	88638	1	1	10553	7	0.534039	0.0802664	chr2R	C;C	8881193	8881199	FBtr0088638	FBgn0011286	RyR
11286	304571	1	1	5528	7	1	0.00148562	chr2R	C;C	8873980	8873986	FBtr0304571	FBgn0011286	RyR
11286	304571	1	1	10828	7	0.534039	0.0802664	chr2R	C;C	8881193	8881199	FBtr0304571	FBgn0011286	RyR
11286	304568	1	1	5528	7	1	0.00148562	chr2R	C;C	8873980	8873986	FBtr0304568	FBgn0011286	RyR
11286	304568	1	1	10786	7	0.534039	0.0802664	chr2R	C;C	8881193	8881199	FBtr0304568	FBgn0011286	RyR
11286	308083	1	1	5330	7	1	0.00148562	chr2R	C;C	8873980	8873986	FBtr0308083	FBgn0011286	RyR
11286	308083	1	1	10576	7	0.534039	0.0802664	chr2R	C;C	8881193	8881199	FBtr0308083	FBgn0011286	RyR
11286	88637	1	1	5330	7	1	0.00148562	chr2R	C;C	8873980	8873986	FBtr0088637	FBgn0011286	RyR
11286	88637	1	1	10630	7	0.534039	0.0802664	chr2R	C;C	8881193	8881199	FBtr0088637	FBgn0011286	RyR
11286	304570	1	1	5551	7	1	0.00148562	chr2R	C;C	8873980	8873986	FBtr0304570	FBgn0011286	RyR
11286	304570	1	1	10839	7	0.534039	0.0802664	chr2R	C;C	8881193	8881199	FBtr0304570	FBgn0011286	RyR
11286	304569	1	1	5295	7	1	0.00148562	chr2R	C;C	8873980	8873986	FBtr0304569	FBgn0011286	RyR
11286	304569	1	1	10571	7	0.534039	0.0802664	chr2R	C;C	8881193	8881199	FBtr0304569	FBgn0011286	RyR
11286	88639	1	1	5295	7	1	0.00148562	chr2R	C;C	8873980	8873986	FBtr0088639	FBgn0011286	RyR
11286	88639	1	1	10553	7	0.534039	0.0802664	chr2R	C;C	8881193	8881199	FBtr0088639	FBgn0011286	RyR
11286	304572	1	1	5333	7	1	0.00148562	chr2R	C;C	8873980	8873986	FBtr0304572	FBgn0011286	RyR
11286	304572	1	1	10633	7	0.534039	0.0802664	chr2R	C;C	8881193	8881199	FBtr0304572	FBgn0011286	RyR
11286	88640	1	1	5295	7	1	0.00148562	chr2R	C;C	8873980	8873986	FBtr0088640	FBgn0011286	RyR
11286	88640	1	1	10595	7	0.534039	0.0802664	chr2R	C;C	8881193	8881199	FBtr0088640	FBgn0011286	RyR
3210	343568	1	1	2206	7	0.534039	0.0132336	chrX	C;C	4538289	4538295	FBtr0343568	FBgn0003210	rb
3210	332290	1	1	2206	7	0.534039	0.0132336	chrX	C;C	4538289	4538295	FBtr0332290	FBgn0003210	rb
3210	70702	1	1	2206	7	0.534039	0.0132336	chrX	C;C	4538289	4538295	FBtr0070702	FBgn0003210	rb
33864	87627	1	1	2554	7	0.534039	0.00992595	chr2R	C;C	13670290	13670296	FBtr0087627	FBgn0033864	CG18368
30858	74480	1	1	1366	7	1	0.0336307	chrX	C;C	17655122	17655128	FBtr0074480	FBgn0030858	IntS2
30858	74480	1	1	1664	7	1	0.0035061	chrX	C;C	17654824	17654830	FBtr0074480	FBgn0030858	IntS2
33710	87893	1	1	1623	7	0.651555	0.00790651	chr2R	C;C	12309206	12309212	FBtr0087893	FBgn0033710	CG17739
30668	343332	1	1	447	7	0.534039	0.025578	chrX	5;5	15698321	15698327	FBtr0343332	FBgn0030668	CG8128
35578	308822	1	1	743	7	1	0.0322674	chr3L	5;5	4839347	4839353	FBtr0308822	FBgn0035578	CG13707
266674	84034	1	1	1489	7	0.651555	0.0292614	chr3R	C;C	21106349	21106355	FBtr0084034	FBgn0266674	Sec15
25637	100530	1	1	620	7	1	0.000238256	chrX	5;5	656976	656982	FBtr0100530	FBgn0025637	SkpA
50414	343204	1	1	453	7	1	0.0123145	chr2R	C;C	23384770	23384776	FBtr0343204	FBgn0050414	CG30414
50414	343204	1	1	739	7	1	0.0435558	chr2R	C;C	23384429	23384435	FBtr0343204	FBgn0050414	CG30414
50414	302316	1	1	572	7	1	0.0123145	chr2R	C;C	23384770	23384776	FBtr0302316	FBgn0050414	CG30414
50414	302316	1	1	858	7	1	0.0435558	chr2R	C;C	23384429	23384435	FBtr0302316	FBgn0050414	CG30414
37622	81914	1	1	507	7	0.534039	0.0149539	chr3R	C;C	8732837	8732843	FBtr0081914	FBgn0037622	CG8202
37622	81914	1	1	2011	7	1	0.0230831	chr3R	C;C	8734578	8734584	FBtr0081914	FBgn0037622	CG8202
37622	81914	1	1	2927	7	0.651555	0.0111875	chr3R	3;3	8735673	8735679	FBtr0081914	FBgn0037622	CG8202
52580	74205	1	1	2321	7	0.651555	0.0329491	chrX	C;C	16012001	16012007	FBtr0074205	FBgn0052580	Muc14A
38130	82737	1	1	1501	7	0.534039	0.0148315	chr3R	C;C	13283856	13283862	FBtr0082737	FBgn0038130	CG8630
87040	76393	1	1	422	7	0.651555	0.0513043	chr3L	C;C	9682176	9682182	FBtr0076393	FBgn0087040	alphaTub67C
87040	76393	1	1	1032	7	0.534039	0.0810581	chr3L	C;C	9682786	9682792	FBtr0076393	FBgn0087040	alphaTub67C
87040	76393	1	1	1124	7	1	0.29641	chr3L	C;C	9682878	9682884	FBtr0076393	FBgn0087040	alphaTub67C
87040	76393	1	1	1304	7	1	0.0362031	chr3L	C;C	9683058	9683064	FBtr0076393	FBgn0087040	alphaTub67C
8	71764	1	1	1099	7	0.651555	0.00158753	chr2R	C;C	22163143	22163149	FBtr0071764	FBgn0000008	a
8	71764	1	1	1516	7	0.534039	0.0196026	chr2R	C;C	22163560	22163566	FBtr0071764	FBgn0000008	a
8	71764	1	1	3588	7	0.534039	0.00512691	chr2R	C;C	22171028	22171034	FBtr0071764	FBgn0000008	a
8	100521	1	1	591	7	0.651555	0.00158753	chr2R	C;C	22163143	22163149	FBtr0100521	FBgn0000008	a
8	100521	1	1	1008	7	0.534039	0.0196026	chr2R	C;C	22163560	22163566	FBtr0100521	FBgn0000008	a
8	100521	1	1	3080	7	0.534039	0.00512691	chr2R	C;C	22171028	22171034	FBtr0100521	FBgn0000008	a
8	71763	1	1	773	7	0.651555	0.00158753	chr2R	C;C	22163143	22163149	FBtr0071763	FBgn0000008	a
8	71763	1	1	1190	7	0.534039	0.0196026	chr2R	C;C	22163560	22163566	FBtr0071763	FBgn0000008	a
8	71763	1	1	3262	7	0.534039	0.00512691	chr2R	C;C	22171028	22171034	FBtr0071763	FBgn0000008	a
8	342981	1	1	549	7	0.651555	0.00158753	chr2R	C;C	22163143	22163149	FBtr0342981	FBgn0000008	a
8	342981	1	1	966	7	0.534039	0.0196026	chr2R	C;C	22163560	22163566	FBtr0342981	FBgn0000008	a
8	342981	1	1	3038	7	0.534039	0.00512691	chr2R	C;C	22171028	22171034	FBtr0342981	FBgn0000008	a
43884	305043	1	1	3454	7	0.651555	0.00888388	chr3R	C;C	24238518	24238524	FBtr0305043	FBgn0043884	mask
43884	305043	1	1	4166	7	1	0.0322752	chr3R	C;C	24239230	24239236	FBtr0305043	FBgn0043884	mask
43884	305043	1	1	8181	7	0.651555	0.0692404	chr3R	C;C	24243851	24243857	FBtr0305043	FBgn0043884	mask
43884	345261	1	1	2212	7	0.651555	0.00888388	chr3R	C;C	24238518	24238524	FBtr0345261	FBgn0043884	mask
43884	345261	1	1	2924	7	1	0.0322752	chr3R	C;C	24239230	24239236	FBtr0345261	FBgn0043884	mask
43884	345261	1	1	6948	7	0.651555	0.0692404	chr3R	C;C	24243851	24243857	FBtr0345261	FBgn0043884	mask
43884	84563	1	1	3418	7	0.651555	0.00888388	chr3R	C;C	24238518	24238524	FBtr0084563	FBgn0043884	mask
43884	84563	1	1	4130	7	1	0.0322752	chr3R	C;C	24239230	24239236	FBtr0084563	FBgn0043884	mask
43884	84563	1	1	8154	7	0.651555	0.0692404	chr3R	C;C	24243851	24243857	FBtr0084563	FBgn0043884	mask
43884	84562	1	1	3418	7	0.651555	0.00888388	chr3R	C;C	24238518	24238524	FBtr0084562	FBgn0043884	mask
43884	84562	1	1	4130	7	1	0.0322752	chr3R	C;C	24239230	24239236	FBtr0084562	FBgn0043884	mask
43884	84562	1	1	8154	7	0.651555	0.0692404	chr3R	C;C	24243851	24243857	FBtr0084562	FBgn0043884	mask
43884	334942	1	1	2251	7	0.651555	0.00888388	chr3R	C;C	24238518	24238524	FBtr0334942	FBgn0043884	mask
43884	334942	1	1	2963	7	1	0.0322752	chr3R	C;C	24239230	24239236	FBtr0334942	FBgn0043884	mask
43884	334942	1	1	6987	7	0.651555	0.0692404	chr3R	C;C	24243851	24243857	FBtr0334942	FBgn0043884	mask
43884	334943	1	1	3418	7	0.651555	0.00888388	chr3R	C;C	24238518	24238524	FBtr0334943	FBgn0043884	mask
43884	334943	1	1	4130	7	1	0.0322752	chr3R	C;C	24239230	24239236	FBtr0334943	FBgn0043884	mask
43884	334943	1	1	8151	7	0.651555	0.0692404	chr3R	C;C	24243851	24243857	FBtr0334943	FBgn0043884	mask
30334	73557	1	1	356	7	1	0.00258236	chrX	C;C	11790954	11790960	FBtr0073557	FBgn0030334	Karl
30334	73557	1	1	1294	7	1	0.165616	chrX	3;3	11792130	11792136	FBtr0073557	FBgn0030334	Karl
30334	73556	1	1	356	7	1	0.00258236	chrX	C;C	11790954	11790960	FBtr0073556	FBgn0030334	Karl
30334	346276	1	1	1385	7	1	0.00258236	chrX	C;C	11790954	11790960	FBtr0346276	FBgn0030334	Karl
30334	346276	1	1	2323	7	1	0.165616	chrX	3;3	11792130	11792136	FBtr0346276	FBgn0030334	Karl
30334	346277	1	1	712	7	1	0.00258236	chrX	C;C	11790954	11790960	FBtr0346277	FBgn0030334	Karl
30334	346277	1	1	1650	7	1	0.165616	chrX	3;3	11792130	11792136	FBtr0346277	FBgn0030334	Karl
32478	80437	1	1	970	7	0.534039	0.000344852	chr2L	C;C	13184584	13184590	FBtr0080437	FBgn0032478	CG5458
35101	299866	1	1	2013	7	0.651555	0.0117051	chr3L	C;3	173902	173908	FBtr0299866	FBgn0035101	p130CAS
35101	299864	1	1	2676	7	0.651555	0.0117051	chr3L	C;3	173902	173908	FBtr0299864	FBgn0035101	p130CAS
35101	299865	1	1	1969	7	0.651555	0.0117051	chr3L	C;3	173902	173908	FBtr0299865	FBgn0035101	p130CAS
35101	72475	1	1	2080	7	0.651555	0.0117051	chr3L	C;3	173902	173908	FBtr0072475	FBgn0035101	p130CAS
35101	301889	1	1	2823	7	0.651555	0.0117051	chr3L	C;3	173902	173908	FBtr0301889	FBgn0035101	p130CAS
37200	78552	1	1	879	7	0.534039	0.0665603	chr3L	C;C	22873167	22873173	FBtr0078552	FBgn0037200	CG11109
37200	78553	1	1	909	7	0.534039	0.0665603	chr3L	C;C	22873167	22873173	FBtr0078553	FBgn0037200	CG11109
262125	310266	1	1	1616	7	0.534039	0.045913	chr3R	C;C	5650861	5650867	FBtr0310266	FBgn0262125	Sec23
262125	78711	1	1	1645	7	0.534039	0.045913	chr3R	C;C	5650861	5650867	FBtr0078711	FBgn0262125	Sec23
262125	304794	1	1	1737	7	0.534039	0.045913	chr3R	C;C	5650861	5650867	FBtr0304794	FBgn0262125	Sec23
262125	309091	1	1	1616	7	0.534039	0.045913	chr3R	C;C	5650861	5650867	FBtr0309091	FBgn0262125	Sec23
262125	330314	1	1	1529	7	0.534039	0.045913	chr3R	C;C	5650861	5650867	FBtr0330314	FBgn0262125	Sec23
262125	78710	1	1	1737	7	0.534039	0.045913	chr3R	C;C	5650861	5650867	FBtr0078710	FBgn0262125	Sec23
262125	339320	1	1	1616	7	0.534039	0.045913	chr3R	C;C	5650861	5650867	FBtr0339320	FBgn0262125	Sec23
32305	80187	1	1	4011	7	1	0.0409318	chr2L	3;3	10838225	10838231	FBtr0080187	FBgn0032305	CG6700
32305	80187	1	1	4458	7	0.651555	0.146146	chr2L	3;3	10837778	10837784	FBtr0080187	FBgn0032305	CG6700
32305	301710	1	1	4007	7	1	0.0409318	chr2L	3;3	10838225	10838231	FBtr0301710	FBgn0032305	CG6700
13725	87516	1	1	1491	7	1	0.00874031	chr2R	3;3	14427677	14427683	FBtr0087516	FBgn0013725	phyl
261849	303417	1	1	116	7	0.534039	0.0293461	chrX	C;C	7382868	7382874	FBtr0303417	FBgn0261849	CG42781
263316	302027	1	1	505	7	0.534039	0.053505	chr3R	5;C	11569755	11569761	FBtr0302027	FBgn0263316	Mrp4
33341	88684	1	1	417	7	1	0.00847934	chr2R	C;C	8900952	8900958	FBtr0088684	FBgn0033341	MrgBP
38286	344380	1	1	1935	7	0.534039	0.0207501	chr3R	C;C	15082018	15082024	FBtr0344380	FBgn0038286	CG6966
38286	113236	1	1	1935	7	0.534039	0.0207501	chr3R	C;C	15082018	15082024	FBtr0113236	FBgn0038286	CG6966
37213	78962	1	1	2622	7	0.534039	0.00223815	chr3R	C;C	4183913	4183919	FBtr0078962	FBgn0037213	CG12581
37213	78961	1	1	2554	7	0.534039	0.00223815	chr3R	C;C	4183913	4183919	FBtr0078961	FBgn0037213	CG12581
37213	78961	1	1	3177	7	0.534039	0.168573	chr3R	3;3	4184536	4184542	FBtr0078961	FBgn0037213	CG12581
520	70487	1	1	260	7	0.534039	0.0989236	chrX	C;C	2727958	2727964	FBtr0070487	FBgn0000520	dwg
520	70487	1	1	735	7	0.651555	0.0228597	chrX	C;C	2728714	2728720	FBtr0070487	FBgn0000520	dwg
26268	73468	1	1	531	7	0.534039	0.0322554	chrX	C;C	11168521	11168527	FBtr0073468	FBgn0026268	antdh
51326	82901	1	1	344	7	0.534039	0.105099	chr3R	C;C	14219665	14219671	FBtr0082901	FBgn0051326	CG31326
51326	82901	1	1	1602	7	0.534039	0.0725128	chr3R	3;3	14218288	14218294	FBtr0082901	FBgn0051326	CG31326
263998	330332	1	1	366	7	1	0.0019641	chr2R	C;C	13151045	13151051	FBtr0330332	FBgn0263998	Ack-like
263998	330329	1	1	366	7	1	0.0019641	chr2R	C;C	13151045	13151051	FBtr0330329	FBgn0263998	Ack-like
263998	330329	1	1	4282	7	1	0.00229703	chr2R	3;3	13142906	13142912	FBtr0330329	FBgn0263998	Ack-like
263998	330331	1	1	366	7	1	0.0019641	chr2R	C;C	13151045	13151051	FBtr0330331	FBgn0263998	Ack-like
263998	330331	1	1	4285	7	1	0.00229703	chr2R	3;3	13142906	13142912	FBtr0330331	FBgn0263998	Ack-like
263998	330330	1	1	366	7	1	0.0019641	chr2R	C;C	13151045	13151051	FBtr0330330	FBgn0263998	Ack-like
36035	76412	1	1	515	7	0.534039	0.00305786	chr3L	C;C	9718574	9718580	FBtr0076412	FBgn0036035	CG18178
36035	331542	1	1	483	7	0.534039	0.00305786	chr3L	C;C	9718574	9718580	FBtr0331542	FBgn0036035	CG18178
36173	333215	1	1	1040	7	1	0.00330215	chr3L	3;3	11563922	11563928	FBtr0333215	FBgn0036173	CG7394
36173	305648	1	1	924	7	1	0.00330215	chr3L	3;3	11563922	11563928	FBtr0305648	FBgn0036173	CG7394
261089	340251	1	1	153	7	1	0.053652	chr2L	5;5	17594818	17594824	FBtr0340251	FBgn0261089	Sytalpha
261089	340251	1	1	251	7	1	0.000673055	chr2L	5;5	17594916	17594922	FBtr0340251	FBgn0261089	Sytalpha
261089	303255	1	1	153	7	1	0.053652	chr2L	5;5	17594818	17594824	FBtr0303255	FBgn0261089	Sytalpha
261089	303255	1	1	251	7	1	0.000673055	chr2L	5;5	17594916	17594922	FBtr0303255	FBgn0261089	Sytalpha
39704	85485	1	1	1987	7	1	0.00917539	chr3R	C;C	29824595	29824601	FBtr0085485	FBgn0039704	neo
39704	85486	1	1	2015	7	1	0.00917539	chr3R	C;C	29824595	29824601	FBtr0085486	FBgn0039704	neo
1168	100153	1	1	1262	7	0.534039	0.010125	chr3L	C;C	8678181	8678187	FBtr0100153	FBgn0001168	h
1168	76569	1	1	1066	7	0.534039	0.010125	chr3L	C;C	8678181	8678187	FBtr0076569	FBgn0001168	h
32163	79898	1	1	1011	7	0.651555	0.0331971	chr2L	C;C	9923601	9923607	FBtr0079898	FBgn0032163	TbCMF46
39577	301672	1	1	296	7	0.651555	0.0387574	chr3R	C;C	28304303	28304309	FBtr0301672	FBgn0039577	CG12516
38361	83173	1	1	237	7	0.651555	0.00973783	chr3R	C;C	15788758	15788764	FBtr0083173	FBgn0038361	CG9589
527	84106	1	1	575	7	1	0.000274332	chr3R	C;C	21232735	21232741	FBtr0084106	FBgn0000527	e
527	84106	1	1	2705	7	1	0.0120411	chr3R	C;C	21230269	21230275	FBtr0084106	FBgn0000527	e
37773	306611	1	1	252	7	0.534039	0.150558	chr3R	C;C	10001018	10001024	FBtr0306611	FBgn0037773	CG5359
37773	300257	1	1	252	7	0.534039	0.150558	chr3R	C;C	10001018	10001024	FBtr0300257	FBgn0037773	CG5359
37773	82215	1	1	252	7	0.534039	0.150558	chr3R	C;C	10001018	10001024	FBtr0082215	FBgn0037773	CG5359
29105	72148	1	1	269	7	1	0.0244091	chr2R	5;5	23958111	23958117	FBtr0072148	FBgn0029105	alpha-Catr
29105	330254	1	1	269	7	1	0.0244091	chr2R	5;5	23958111	23958117	FBtr0330254	FBgn0029105	alpha-Catr
51065	113383	1	1	939	7	0.651555	0.00894375	chr3R	C;C	27164657	27164663	FBtr0113383	FBgn0051065	ppk31
267978	86059	1	1	2120	7	1	0.0465538	chr2R	3;3	5706742	5706748	FBtr0086059	FBgn0267978	ap
267978	86058	1	1	3567	7	1	0.0465538	chr2R	3;3	5706742	5706748	FBtr0086058	FBgn0267978	ap
16059	86891	1	1	4083	7	1	0.00454261	chr2R	3;3	17673011	17673017	FBtr0086891	FBgn0016059	Sema1b
16059	86891	1	1	4087	7	0.651555	0.0130802	chr2R	3;3	17673007	17673013	FBtr0086891	FBgn0016059	Sema1b
16059	86890	1	1	4090	7	1	0.00454261	chr2R	3;3	17673011	17673017	FBtr0086890	FBgn0016059	Sema1b
16059	86890	1	1	4094	7	0.651555	0.0130802	chr2R	3;3	17673007	17673013	FBtr0086890	FBgn0016059	Sema1b
33469	339424	1	1	1085	7	1	0.0808513	chr2R	3;3	9968380	9968386	FBtr0339424	FBgn0033469	CG12133
4511	73612	1	1	2659	7	0.651555	0.0328995	chrX	C;C	11771178	11771184	FBtr0073612	FBgn0004511	dy
10113	85619	1	1	2641	7	0.651555	0.0611929	chr3R	C;C	30360012	30360018	FBtr0085619	FBgn0010113	hdc
10113	85619	1	1	4216	7	1	0.069426	chr3R	3;3	30361792	30361798	FBtr0085619	FBgn0010113	hdc
10113	85620	1	1	484	7	0.651555	0.0611929	chr3R	C;C	30360012	30360018	FBtr0085620	FBgn0010113	hdc
10113	85620	1	1	2059	7	1	0.069426	chr3R	3;3	30361792	30361798	FBtr0085620	FBgn0010113	hdc
10113	85621	1	1	2641	7	0.651555	0.0611929	chr3R	C;C	30360012	30360018	FBtr0085621	FBgn0010113	hdc
10113	85621	1	1	4216	7	1	0.069426	chr3R	C;C	30361792	30361798	FBtr0085621	FBgn0010113	hdc
10113	330311	1	1	2641	7	0.651555	0.0611929	chr3R	C;C	30360012	30360018	FBtr0330311	FBgn0010113	hdc
10113	330311	1	1	4216	7	1	0.069426	chr3R	3;3	30361792	30361798	FBtr0330311	FBgn0010113	hdc
10113	330311	1	1	12458	7	1	0.0916651	chr3R	3;3	30370034	30370040	FBtr0330311	FBgn0010113	hdc
85218	112382	1	1	57	7	0.651555	0.0109047	chr2R	5;C	16754501	16754507	FBtr0112382	FBgn0085218	CG34189
29974	71134	1	1	1268	7	1	0.0341621	chrX	C;C	7906090	7906096	FBtr0071134	FBgn0029974	dpr14
29974	71134	1	1	1341	7	0.534039	0.00673621	chrX	C;C	7905967	7905973	FBtr0071134	FBgn0029974	dpr14
29974	307270	1	1	68	7	1	0.0420875	chrX	5;5	7908212	7908218	FBtr0307270	FBgn0029974	dpr14
29974	307270	1	1	1451	7	1	0.0341621	chrX	C;C	7906090	7906096	FBtr0307270	FBgn0029974	dpr14
29974	307270	1	1	1524	7	0.534039	0.00673621	chrX	C;C	7905967	7905973	FBtr0307270	FBgn0029974	dpr14
29974	307270	1	1	2161	7	1	0.07805	chrX	3;3	7905330	7905336	FBtr0307270	FBgn0029974	dpr14
38300	83048	1	1	1270	7	0.534039	0.0149047	chr3R	C;C	15210474	15210480	FBtr0083048	FBgn0038300	Mau2
38300	83048	1	1	1477	7	1	0.0312175	chr3R	C;C	15210681	15210687	FBtr0083048	FBgn0038300	Mau2
39858	85802	1	1	1909	7	0.651555	0.0347023	chr3R	C;C	31601192	31601198	FBtr0085802	FBgn0039858	CycG
39858	85799	1	1	1322	7	0.651555	0.0347023	chr3R	C;C	31601192	31601198	FBtr0085799	FBgn0039858	CycG
39858	333328	1	1	1066	7	0.651555	0.0347023	chr3R	C;C	31601192	31601198	FBtr0333328	FBgn0039858	CycG
39858	85800	1	1	1066	7	0.651555	0.0347023	chr3R	C;C	31601192	31601198	FBtr0085800	FBgn0039858	CycG
39858	85803	1	1	1464	7	0.651555	0.0347023	chr3R	C;C	31601192	31601198	FBtr0085803	FBgn0039858	CycG
39368	337040	1	1	110	7	0.651555	0.0492748	chr3R	C;C	25776052	25776058	FBtr0337040	FBgn0039368	CG17196
39368	84922	1	1	179	7	0.651555	0.00259339	chr3R	C;C	25776052	25776058	FBtr0084922	FBgn0039368	CG17196
52857	70052	1	1	1034	7	0.651555	0.00590084	chrX	3;3	21615467	21615473	FBtr0070052	FBgn0052857	CG32857
33063	332948	1	1	782	7	0.651555	0.00441072	chr2R	C;C	61382606138318	61382606138323	FBtr0332948	FBgn0033063	CG14589
39250	84716	1	1	1843	7	0.651555	0.153479	chr3R	C;C	24924493	24924499	FBtr0084716	FBgn0039250	Mink
28996	89104	1	1	111	7	1	0.00550132	chr4	5;5	607532	607538	FBtr0089104	FBgn0028996	onecut
28996	89104	1	1	4416	7	0.651555	0.0469077	chr4	3;3	600874	600880	FBtr0089104	FBgn0028996	onecut
28996	310610	1	1	111	7	1	0.00550132	chr4	5;5	607532	607538	FBtr0310610	FBgn0028996	onecut
28996	310610	1	1	3724	7	0.651555	0.0469077	chr4	3;3	600874	600880	FBtr0310610	FBgn0028996	onecut
33636	333071	1	1	1245	7	0.534039	0.0113152	chr2R	C;C	11590785	11590791	FBtr0333071	FBgn0033636	tou
33636	333071	1	1	1809	7	0.534039	0.0394537	chr2R	C;C	11590160	11590166	FBtr0333071	FBgn0033636	tou
33636	333071	1	1	9292	7	0.534039	0.0177377	chr2R	C;C	11580431	11580437	FBtr0333071	FBgn0033636	tou
33636	333070	1	1	980	7	0.534039	0.0113152	chr2R	C;C	11590785	11590791	FBtr0333070	FBgn0033636	tou
33636	333070	1	1	1544	7	0.534039	0.0394537	chr2R	C;C	11590160	11590166	FBtr0333070	FBgn0033636	tou
33636	333070	1	1	8919	7	0.534039	0.0177377	chr2R	C;C	11580431	11580437	FBtr0333070	FBgn0033636	tou
33636	88091	1	1	1279	7	0.534039	0.0113152	chr2R	C;C	11590785	11590791	FBtr0088091	FBgn0033636	tou
33636	88091	1	1	1843	7	0.534039	0.0394537	chr2R	C;C	11590160	11590166	FBtr0088091	FBgn0033636	tou
33636	88091	1	1	9041	7	0.534039	0.0177377	chr2R	C;C	11580431	11580437	FBtr0088091	FBgn0033636	tou
33636	113066	1	1	1279	7	0.534039	0.0113152	chr2R	C;C	11590785	11590791	FBtr0113066	FBgn0033636	tou
33636	113066	1	1	1843	7	0.534039	0.0394537	chr2R	C;C	11590160	11590166	FBtr0113066	FBgn0033636	tou
33636	113066	1	1	9437	7	0.534039	0.0177377	chr2R	C;C	11580431	11580437	FBtr0113066	FBgn0033636	tou
33636	88094	1	1	1499	7	0.534039	0.0177377	chr2R	C;C	11580431	11580437	FBtr0088094	FBgn0033636	tou
32997	299924	1	1	888	7	1	0.0107087	chr2R	C;C	4619918	4619924	FBtr0299924	FBgn0032997	CG17486
3089	300340	1	1	978	7	0.534039	0.0230737	chr3L	C;C	19301040	19301046	FBtr0300340	FBgn0003089	pip
3089	75013	1	1	1334	7	1	0.00119399	chr3L	C;C	1930995219309890	1930995619309890	FBtr0075013	FBgn0003089	pip
3089	333897	1	1	1331	7	1	0.00119399	chr3L	C;C	1930995219309890	1930995619309890	FBtr0333897	FBgn0003089	pip
3089	75012	1	1	675	7	0.651555	0.000742387	chr3L	C;C	19311997	19312003	FBtr0075012	FBgn0003089	pip
3089	75012	1	1	1055	7	1	0.00512657	chr3L	C;C	1931161919311310	1931162319311310	FBtr0075012	FBgn0003089	pip
3089	75011	1	1	978	7	0.534039	0.0230737	chr3L	C;C	19301040	19301046	FBtr0075011	FBgn0003089	pip
41111	77633	1	1	6807	7	0.534039	0.234757	chr2L	C;C	2951229	2951235	FBtr0077633	FBgn0041111	lilli
41111	77632	1	1	6975	7	0.534039	0.234757	chr2L	C;C	2951229	2951235	FBtr0077632	FBgn0041111	lilli
41111	452101	1	1	6044	7	0.534039	0.234757	chr2L	C;C	2951229	2951235	FBtr0452101	FBgn0041111	lilli
41111	290040	1	1	4356	7	0.534039	0.234757	chr2L	C;C	2951229	2951235	FBtr0290040	FBgn0041111	lilli
41111	290039	1	1	4587	7	0.534039	0.234757	chr2L	C;C	2951229	2951235	FBtr0290039	FBgn0041111	lilli
41111	290041	1	1	5891	7	0.534039	0.234757	chr2L	C;C	2951229	2951235	FBtr0290041	FBgn0041111	lilli
41111	332458	1	1	6044	7	0.534039	0.234757	chr2L	C;C	2951229	2951235	FBtr0332458	FBgn0041111	lilli
41111	77634	1	1	5696	7	0.534039	0.234757	chr2L	C;C	2951229	2951235	FBtr0077634	FBgn0041111	lilli
41111	290038	1	1	4247	7	0.534039	0.234757	chr2L	C;C	2951229	2951235	FBtr0290038	FBgn0041111	lilli
33692	339595	1	1	1744	7	0.534039	0.0281608	chr2R	3;3	12182322	12182328	FBtr0339595	FBgn0033692	wash
33692	87989	1	1	1699	7	0.534039	0.0281608	chr2R	3;3	12182322	12182328	FBtr0087989	FBgn0033692	wash
24973	70498	1	1	842	7	0.534039	0.00878952	chrX	C;C	2719349	2719355	FBtr0070498	FBgn0024973	CG2701
60296	72417	1	1	448	7	1	0.0232079	chr2R	C;C	24924158	24924164	FBtr0072417	FBgn0060296	pain
263102	88279	1	1	743	7	1	0.00107392	chr2R	5;5	10610800	10610806	FBtr0088279	FBgn0263102	psq
263102	88279	1	1	3380	7	1	0.00962545	chr2R	3;3	10614849	10614855	FBtr0088279	FBgn0263102	psq
263102	88281	1	1	513	7	1	0.00107392	chr2R	5;5	10610800	10610806	FBtr0088281	FBgn0263102	psq
263102	88281	1	1	3150	7	1	0.00962545	chr2R	3;3	10614849	10614855	FBtr0088281	FBgn0263102	psq
263102	88277	1	1	427	7	1	0.00107392	chr2R	5;5	10610800	10610806	FBtr0088277	FBgn0263102	psq
263102	88277	1	1	3064	7	1	0.00962545	chr2R	3;3	10614849	10614855	FBtr0088277	FBgn0263102	psq
263102	100607	1	1	439	7	1	0.00107392	chr2R	5;5	10610800	10610806	FBtr0100607	FBgn0263102	psq
263102	100607	1	1	1310	7	1	0.028148	chr2R	5;C	10611671	10611677	FBtr0100607	FBgn0263102	psq
263102	100607	1	1	3240	7	1	0.00962545	chr2R	3;3	10614849	10614855	FBtr0100607	FBgn0263102	psq
263102	88278	1	1	688	7	1	0.00107392	chr2R	5;5	10610800	10610806	FBtr0088278	FBgn0263102	psq
263102	88278	1	1	3325	7	1	0.00962545	chr2R	3;3	10614849	10614855	FBtr0088278	FBgn0263102	psq
263102	88280	1	1	476	7	1	0.00107392	chr2R	5;5	10610800	10610806	FBtr0088280	FBgn0263102	psq
263102	88280	1	1	3113	7	1	0.00962545	chr2R	3;3	10614849	10614855	FBtr0088280	FBgn0263102	psq
263102	88276	1	1	1330	7	1	0.00107392	chr2R	C;C	10610800	10610806	FBtr0088276	FBgn0263102	psq
263102	88276	1	1	3913	7	1	0.00962545	chr2R	3;3	10614849	10614855	FBtr0088276	FBgn0263102	psq
263102	88275	1	1	1330	7	1	0.00107392	chr2R	C;C	10610800	10610806	FBtr0088275	FBgn0263102	psq
263102	88275	1	1	3967	7	1	0.00962545	chr2R	3;3	10614849	10614855	FBtr0088275	FBgn0263102	psq
263102	88282	1	1	1173	7	1	0.00107392	chr2R	C;C	10610800	10610806	FBtr0088282	FBgn0263102	psq
263102	88282	1	1	3810	7	1	0.00962545	chr2R	3;3	10614849	10614855	FBtr0088282	FBgn0263102	psq
263102	330607	1	1	1330	7	1	0.00107392	chr2R	C;C	10610800	10610806	FBtr0330607	FBgn0263102	psq
263102	330607	1	1	3904	7	1	0.00962545	chr2R	C;C	10614849	10614855	FBtr0330607	FBgn0263102	psq
263102	346958	1	1	1330	7	1	0.00107392	chr2R	C;C	10610800	10610806	FBtr0346958	FBgn0263102	psq
263102	346958	1	1	3904	7	1	0.00962545	chr2R	3;3	10614849	10614855	FBtr0346958	FBgn0263102	psq
263102	100606	1	1	688	7	1	0.00107392	chr2R	5;5	10610800	10610806	FBtr0100606	FBgn0263102	psq
263102	100606	1	1	1559	7	1	0.028148	chr2R	5;C	10611671	10611677	FBtr0100606	FBgn0263102	psq
263102	100606	1	1	3489	7	1	0.00962545	chr2R	3;3	10614849	10614855	FBtr0100606	FBgn0263102	psq
38860	113258	1	1	497	7	1	4.39266e-05	chr3R	5;5	21130792	21130798	FBtr0113258	FBgn0038860	Ice2
38860	84015	1	1	576	7	1	4.39266e-05	chr3R	C;C	21130792	21130798	FBtr0084015	FBgn0038860	Ice2
1325	333162	1	1	1742	7	0.534039	0.0708724	chr2R	C;C	25228726	25228732	FBtr0333162	FBgn0001325	Kr
1325	72449	1	1	1742	7	0.534039	0.0708724	chr2R	C;C	25228726	25228732	FBtr0072449	FBgn0001325	Kr
316	70064	1	1	34	7	1	0.000258856	chrX	5;5	255708	255714	FBtr0070064	FBgn0000316	cin
316	70064	1	1	1332	7	1	0.0127775	chrX	C;C	257240	257246	FBtr0070064	FBgn0000316	cin
316	70065	1	1	34	7	1	0.000258856	chrX	5;5	255708	255714	FBtr0070065	FBgn0000316	cin
316	70065	1	1	1332	7	1	0.0127775	chrX	C;C	257240	257246	FBtr0070065	FBgn0000316	cin
36512	75563	1	1	1165	7	0.534039	0.0357099	chr3L	C;C	15577794	15577800	FBtr0075563	FBgn0036512	CG16979
36512	75563	1	1	1888	7	1	0.015514	chr3L	C;C	15578517	15578523	FBtr0075563	FBgn0036512	CG16979
31635	77412	1	1	526	7	1	0.00500208	chr2L	C;C	4837117	4837123	FBtr0077412	FBgn0031635	tank
31635	77412	1	1	868	7	0.534039	0.00162305	chr2L	C;C	4836775	4836781	FBtr0077412	FBgn0031635	tank
31635	77413	1	1	662	7	1	0.00500208	chr2L	C;C	4837117	4837123	FBtr0077413	FBgn0031635	tank
31635	77413	1	1	1004	7	0.534039	0.00162305	chr2L	C;C	4836775	4836781	FBtr0077413	FBgn0031635	tank
267431	392909	1	1	2350	7	0.534039	0.00182834	chr3R	C;C	1454991	1454997	FBtr0392909	FBgn0267431	Myo81F
20497	79663	1	1	851	7	0.651555	0.0257736	chr2L	C;C	8404768	8404774	FBtr0079663	FBgn0020497	emb
20497	346708	1	1	851	7	0.651555	0.0257736	chr2L	C;C	8404768	8404774	FBtr0346708	FBgn0020497	emb
51897	79673	1	1	2426	7	0.651555	0.115136	chr2L	C;C	8444873	8444879	FBtr0079673	FBgn0051897	CG31897
86916	334063	1	1	1962	7	0.651555	0.0567277	chr3L	C;C	13176512	13176518	FBtr0334063	FBgn0086916	snky
24285	79875	1	1	746	7	0.651555	0.0740133	chr2L	C;C	9913657	9913663	FBtr0079875	FBgn0024285	Srp54
39473	85152	1	1	508	7	0.651555	0.119292	chr3R	C;C	27019183	27019189	FBtr0085152	FBgn0039473	CG17191
34662	302446	1	1	4258	7	0.651555	0.00612924	chr2R	C;C	21825712	21825718	FBtr0302446	FBgn0034662	CG13492
36461	113171	1	1	2007	7	0.534039	0.00582968	chr3L	3;3	14997600	14997606	FBtr0113171	FBgn0036461	Zip71B
36461	347146	1	1	2007	7	0.534039	0.00582968	chr3L	3;3	14997600	14997606	FBtr0347146	FBgn0036461	Zip71B
261610	302921	1	1	1287	7	0.534039	0.00466991	chrX	C;C	5784684	5784690	FBtr0302921	FBgn0261610	CG42699
2567	89934	1	1	287	7	0.651555	0.00888165	chr2R	5;5	9186049	9186055	FBtr0089934	FBgn0002567	Rab32
261555	302711	1	1	500	7	0.651555	0.0467267	chr3L	5;5	9553144	9553150	FBtr0302711	FBgn0261555	CG42673
261555	302710	1	1	3240	7	0.651555	0.0442207	chr3L	3;3	9593848	9593854	FBtr0302710	FBgn0261555	CG42673
261555	302709	1	1	500	7	0.651555	0.0467267	chr3L	5;5	9553144	9553150	FBtr0302709	FBgn0261555	CG42673
261555	302709	1	1	2956	7	0.651555	0.0442207	chr3L	3;3	9593848	9593854	FBtr0302709	FBgn0261555	CG42673
35001	72366	1	1	2681	7	0.651555	0.0721627	chr2R	C;C	24398129	24398135	FBtr0072366	FBgn0035001	Slik
35001	72364	1	1	2288	7	0.651555	0.0721627	chr2R	C;C	24398129	24398135	FBtr0072364	FBgn0035001	Slik
35001	100470	1	1	2288	7	0.651555	0.0721627	chr2R	C;C	24398129	24398135	FBtr0100470	FBgn0035001	Slik
35001	332925	1	1	2330	7	0.651555	0.0721627	chr2R	C;C	24398129	24398135	FBtr0332925	FBgn0035001	Slik
35001	290019	1	1	2247	7	0.651555	0.0721627	chr2R	C;C	24398129	24398135	FBtr0290019	FBgn0035001	Slik
35001	72363	1	1	2288	7	0.651555	0.0721627	chr2R	C;C	24398129	24398135	FBtr0072363	FBgn0035001	Slik
8635	74576	1	1	735	7	1	0.0250734	chrX	C;C	18384501	18384507	FBtr0074576	FBgn0008635	betaCOP
38601	83594	1	1	220	7	0.534039	0.00198087	chr3R	C;C	18301439	18301445	FBtr0083594	FBgn0038601	CG18600
38601	83594	1	1	546	7	0.534039	0.059517	chr3R	C;C	18301113	18301119	FBtr0083594	FBgn0038601	CG18600
85395	308029	1	1	748	7	1	0.00191521	chr2L	5;5	9405879	9405885	FBtr0308029	FBgn0085395	Shawl
85395	332598	1	1	748	7	1	0.00191521	chr2L	5;5	9405879	9405885	FBtr0332598	FBgn0085395	Shawl
51663	77893	1	1	1743	7	0.651555	0.00454633	chr2L	C;C	1867063	1867069	FBtr0077893	FBgn0051663	CG31663
51663	304597	1	1	1743	7	0.651555	0.00454633	chr2L	C;C	1867063	1867069	FBtr0304597	FBgn0051663	CG31663
51663	334826	1	1	22	7	0.651555	0.119597	chr2L	5;5	1881452	1881458	FBtr0334826	FBgn0051663	CG31663
51663	334826	1	1	1911	7	0.651555	0.00454633	chr2L	C;C	1867063	1867069	FBtr0334826	FBgn0051663	CG31663
85190	301006	1	1	260	7	0.651555	0.0294428	chr2L	C;C	10581322	10581328	FBtr0301006	FBgn0085190	CG34161
85190	112352	1	1	260	7	0.651555	0.0294428	chr2L	C;C	10581322	10581328	FBtr0112352	FBgn0085190	CG34161
85190	301005	1	1	245	7	0.651555	0.0635439	chr2L	C;C	10581322	10581328	FBtr0301005	FBgn0085190	CG34161
260941	301056	1	1	1154	7	0.651555	0.0273631	chr3L	5;5	12220621	12220627	FBtr0301056	FBgn0260941	app
260941	301056	1	1	4475	7	0.651555	0.05658	chr3L	3;3	12206315	12206321	FBtr0301056	FBgn0260941	app
260941	334102	1	1	751	7	0.651555	0.0273631	chr3L	5;5	12220621	12220627	FBtr0334102	FBgn0260941	app
260941	334102	1	1	4072	7	0.651555	0.05658	chr3L	3;3	12206315	12206321	FBtr0334102	FBgn0260941	app
260941	334103	1	1	2595	7	0.651555	0.05658	chr3L	3;3	12206315	12206321	FBtr0334103	FBgn0260941	app
260941	301053	1	1	1132	7	0.651555	0.0273631	chr3L	5;5	12220621	12220627	FBtr0301053	FBgn0260941	app
260941	339925	1	1	1100	7	0.651555	0.0273631	chr3L	5;5	12220621	12220627	FBtr0339925	FBgn0260941	app
260941	339925	1	1	4421	7	0.651555	0.05658	chr3L	3;3	12206315	12206321	FBtr0339925	FBgn0260941	app
260941	301052	1	1	1154	7	0.651555	0.0273631	chr3L	5;5	12220621	12220627	FBtr0301052	FBgn0260941	app
260941	304661	1	1	1132	7	0.651555	0.0273631	chr3L	5;5	12220621	12220627	FBtr0304661	FBgn0260941	app
260941	304661	1	1	4338	7	0.651555	0.05658	chr3L	3;3	12206315	12206321	FBtr0304661	FBgn0260941	app
260941	301054	1	1	1154	7	0.651555	0.0273631	chr3L	5;5	12220621	12220627	FBtr0301054	FBgn0260941	app
260941	301057	1	1	1132	7	0.651555	0.0273631	chr3L	5;5	12220621	12220627	FBtr0301057	FBgn0260941	app
260941	301057	1	1	4453	7	0.651555	0.05658	chr3L	3;3	12206315	12206321	FBtr0301057	FBgn0260941	app
260941	301055	1	1	1132	7	0.651555	0.0273631	chr3L	5;5	12220621	12220627	FBtr0301055	FBgn0260941	app
37093	332716	1	1	396	7	1	0.0405662	chr3L	C;C	21517583	21517589	FBtr0332716	FBgn0037093	Cdk12
37093	332716	1	1	2991	7	0.651555	0.0564714	chr3L	C;C	21520547	21520553	FBtr0332716	FBgn0037093	Cdk12
37093	78357	1	1	682	7	1	0.0405662	chr3L	C;C	21517583	21517589	FBtr0078357	FBgn0037093	Cdk12
37093	78357	1	1	3277	7	0.651555	0.0564714	chr3L	C;C	21520547	21520553	FBtr0078357	FBgn0037093	Cdk12
37093	78358	1	1	396	7	1	0.0405662	chr3L	C;C	21517583	21517589	FBtr0078358	FBgn0037093	Cdk12
37093	78358	1	1	2991	7	0.651555	0.0564714	chr3L	C;C	21520547	21520553	FBtr0078358	FBgn0037093	Cdk12
37093	78358	1	1	4253	7	0.651555	0.180493	chr3L	3;3	21522166	21522172	FBtr0078358	FBgn0037093	Cdk12
37093	78358	1	1	4602	7	0.651555	0.00319623	chr3L	3;3	21522515	21522521	FBtr0078358	FBgn0037093	Cdk12
27495	87983	1	1	2216	7	0.534039	0.0272275	chr2R	3;3	12143015	12143021	FBtr0087983	FBgn0027495	Smyd4-4
30141	71363	1	1	317	7	0.651555	0.0166841	chrX	C;C	9602093	9602099	FBtr0071363	FBgn0030141	Gga
20378	71381	1	1	2056	7	1	0.0102238	chrX	C;C	9754456	9754462	FBtr0071381	FBgn0020378	Sp1
20378	310290	1	1	1849	7	1	0.0102238	chrX	C;C	9754456	9754462	FBtr0310290	FBgn0020378	Sp1
20378	273354	1	1	2250	7	1	0.0102238	chrX	C;C	9754456	9754462	FBtr0273354	FBgn0020378	Sp1
20378	331335	1	1	2250	7	1	0.0102238	chrX	C;C	9754456	9754462	FBtr0331335	FBgn0020378	Sp1
85451	310365	1	1	2315	7	0.534039	0.0098057	chrX	C;C	18852051	18852057	FBtr0310365	FBgn0085451	htk
85451	310440	1	1	4410	7	0.534039	0.0098057	chrX	C;C	18852051	18852057	FBtr0310440	FBgn0085451	htk
2948	340297	1	1	1745	7	0.534039	0.111799	chrX	C;C	11584969	11584975	FBtr0340297	FBgn0002948	nod
2948	73516	1	1	1745	7	0.534039	0.111799	chrX	C;C	11584969	11584975	FBtr0073516	FBgn0002948	nod
34075	300575	1	1	2372	7	1	0.246889	chr2R	3;3	16115275	16115281	FBtr0300575	FBgn0034075	Asph
34075	87219	1	1	1587	7	1	0.246889	chr2R	3;3	16115275	16115281	FBtr0087219	FBgn0034075	Asph
34075	310447	1	1	2369	7	1	0.246889	chr2R	3;3	16115275	16115281	FBtr0310447	FBgn0034075	Asph
34075	305092	1	1	1641	7	1	0.246889	chr2R	3;3	16115275	16115281	FBtr0305092	FBgn0034075	Asph
34075	305091	1	1	2426	7	1	0.246889	chr2R	3;3	16115275	16115281	FBtr0305091	FBgn0034075	Asph
261675	77239	1	1	984	7	1	0.0210339	chrX	C;C	20935853	20935859	FBtr0077239	FBgn0261675	Npc1b
35145	72554	1	1	3657	7	0.534039	0.041375	chr3L	C;C	597390	597396	FBtr0072554	FBgn0035145	MED14
35145	72554	1	1	4355	7	1	0.019459	chr3L	C;C	598088	598094	FBtr0072554	FBgn0035145	MED14
35145	344912	1	1	3663	7	0.534039	0.041375	chr3L	C;C	597390	597396	FBtr0344912	FBgn0035145	MED14
35145	344912	1	1	4361	7	1	0.019459	chr3L	C;C	598088	598094	FBtr0344912	FBgn0035145	MED14
261277	346379	1	1	7	7	0.534039	0.00617812	chrX	5;5	11153977	11153983	FBtr0346379	FBgn0261277	rtv
23489	78070	1	1	1081	7	0.534039	0.0249055	chr2L	C;C	578751	578757	FBtr0078070	FBgn0023489	Pph13
266673	84547	1	1	2046	7	1	0.0257121	chr3R	C;C	24137133	24137139	FBtr0084547	FBgn0266673	Sec10
30976	113004	1	1	1771	7	0.534039	0.0893663	chrX	3;3	18909810	18909816	FBtr0113004	FBgn0030976	CG7378
30976	342848	1	1	1798	7	0.534039	0.0893663	chrX	3;3	18909810	18909816	FBtr0342848	FBgn0030976	CG7378
30976	342848	1	1	2823	7	1	0.00720314	chrX	3;3	18910835	18910841	FBtr0342848	FBgn0030976	CG7378
40726	86238	1	1	1549	7	1	0.000184514	chr2R	C;C	20748394	20748400	FBtr0086238	FBgn0040726	dpr1
40726	344877	1	1	1549	7	1	0.000184514	chr2R	C;C	20748394	20748400	FBtr0344877	FBgn0040726	dpr1
29006	86833	1	1	417	7	0.534039	0.0103671	chr2R	5;5	17593208	17593214	FBtr0086833	FBgn0029006	Smurf
29006	86833	1	1	3512	7	0.651555	0.114623	chr2R	C;C	17602475	17602481	FBtr0086833	FBgn0029006	Smurf
29006	333168	1	1	417	7	0.534039	0.0103671	chr2R	5;5	17593208	17593214	FBtr0333168	FBgn0029006	Smurf
29006	333168	1	1	3512	7	0.651555	0.114623	chr2R	C;C	17602475	17602481	FBtr0333168	FBgn0029006	Smurf
23521	70321	1	1	77	7	0.534039	0.0379046	chrX	5;C	1940384	1940390	FBtr0070321	FBgn0023521	CG3587
662	87647	1	1	2231	7	1	0.0296371	chr2R	3;3	13819953	13819959	FBtr0087647	FBgn0000662	fl(2)d
662	304697	1	1	2149	7	1	0.0296371	chr2R	3;3	13819953	13819959	FBtr0304697	FBgn0000662	fl(2)d
662	87648	1	1	1912	7	1	0.0296371	chr2R	3;3	13819953	13819959	FBtr0087648	FBgn0000662	fl(2)d
662	304696	1	1	2099	7	1	0.0296371	chr2R	3;3	13819953	13819959	FBtr0304696	FBgn0000662	fl(2)d
34866	72020	1	1	1101	7	1	0.0136495	chr2R	C;C	23472591	23472597	FBtr0072020	FBgn0034866	Or59c
28974	74404	1	1	903	7	0.651555	0.0217701	chrX	C;C	17158333	17158339	FBtr0074404	FBgn0028974	xmas-2
31318	77966	1	1	1182	7	0.534039	0.00412042	chr2L	C;C	1174940	1174946	FBtr0077966	FBgn0031318	CG4887
31318	331288	1	1	1182	7	0.534039	0.00412042	chr2L	C;C	1174940	1174946	FBtr0331288	FBgn0031318	CG4887
30508	340398	1	1	98	7	0.534039	0.0029518	chrX	5;5	13670181	13670187	FBtr0340398	FBgn0030508	CG15760
30508	340398	1	1	1459	7	1	0.0190655	chrX	C;C	13673040	13673046	FBtr0340398	FBgn0030508	CG15760
30508	73810	1	1	95	7	0.534039	0.00342837	chrX	5;5	13670181	13670187	FBtr0073810	FBgn0030508	CG15760
30508	332888	1	1	98	7	0.534039	0.0029518	chrX	5;5	13670181	13670187	FBtr0332888	FBgn0030508	CG15760
30508	332888	1	1	1459	7	1	0.0190655	chrX	C;C	13673040	13673046	FBtr0332888	FBgn0030508	CG15760
50089	340007	1	1	1956	7	0.534039	0.0273193	chr2R	C;C	15757904	15757910	FBtr0340007	FBgn0050089	CG30089
50089	87285	1	1	3808	7	0.534039	0.00520516	chr2R	C;C	15757904	15757910	FBtr0087285	FBgn0050089	CG30089
263995	330277	1	1	2151	7	0.534039	0.0372579	chr3R	C;C	18010050	18010056	FBtr0330277	FBgn0263995	cpo
263995	330277	1	1	5955	7	0.534039	0.0886925	chr3R	3;3	18016451	18016457	FBtr0330277	FBgn0263995	cpo
263995	330279	1	1	2381	7	0.534039	0.0372579	chr3R	C;C	18010050	18010056	FBtr0330279	FBgn0263995	cpo
263995	330273	1	1	3495	7	0.534039	0.0372579	chr3R	C;C	18010050	18010056	FBtr0330273	FBgn0263995	cpo
263995	330280	1	1	2381	7	0.534039	0.0372579	chr3R	C;C	18010050	18010056	FBtr0330280	FBgn0263995	cpo
263995	330270	1	1	2308	7	0.534039	0.0372579	chr3R	C;C	18010050	18010056	FBtr0330270	FBgn0263995	cpo
263995	330270	1	1	6676	7	0.534039	0.0886925	chr3R	3;3	18016451	18016457	FBtr0330270	FBgn0263995	cpo
263995	330271	1	1	2381	7	0.534039	0.0372579	chr3R	C;C	18010050	18010056	FBtr0330271	FBgn0263995	cpo
263995	330276	1	1	2436	7	0.534039	0.0372579	chr3R	C;C	18010050	18010056	FBtr0330276	FBgn0263995	cpo
263995	330269	1	1	2381	7	0.534039	0.0372579	chr3R	C;C	18010050	18010056	FBtr0330269	FBgn0263995	cpo
263995	330278	1	1	2436	7	0.534039	0.0372579	chr3R	C;C	18010050	18010056	FBtr0330278	FBgn0263995	cpo
263995	330275	1	1	3495	7	0.534039	0.0372579	chr3R	C;C	18010050	18010056	FBtr0330275	FBgn0263995	cpo
263995	330275	1	1	7301	7	0.534039	0.0886925	chr3R	3;3	18016451	18016457	FBtr0330275	FBgn0263995	cpo
263995	330272	1	1	2436	7	0.534039	0.0372579	chr3R	C;C	18010050	18010056	FBtr0330272	FBgn0263995	cpo
263995	330274	1	1	2381	7	0.534039	0.0372579	chr3R	C;C	18010050	18010056	FBtr0330274	FBgn0263995	cpo
263995	330274	1	1	6787	7	0.534039	0.0886925	chr3R	3;3	18016451	18016457	FBtr0330274	FBgn0263995	cpo
37178	78541	1	1	20	7	0.534039	0.0161309	chr3L	5;C	22693786	22693792	FBtr0078541	FBgn0037178	CG12546
263219	299841	1	1	182	7	0.651555	0.00720331	chr3L	5;5	8248566	8248572	FBtr0299841	FBgn0263219	Dscam4
263219	299841	1	1	808	7	1	0.00578282	chr3L	C;C	8255456	8255462	FBtr0299841	FBgn0263219	Dscam4
263219	299839	1	1	182	7	0.651555	0.00720331	chr3L	5;5	8248566	8248572	FBtr0299839	FBgn0263219	Dscam4
263219	299839	1	1	808	7	1	0.00578282	chr3L	C;C	8255456	8255462	FBtr0299839	FBgn0263219	Dscam4
263219	299839	1	1	7252	7	0.534039	0.0774532	chr3L	3;3	8281887	8281893	FBtr0299839	FBgn0263219	Dscam4
263219	333589	1	1	182	7	0.651555	0.00720331	chr3L	5;5	8248566	8248572	FBtr0333589	FBgn0263219	Dscam4
263219	333589	1	1	808	7	1	0.00578282	chr3L	C;C	8255456	8255462	FBtr0333589	FBgn0263219	Dscam4
263219	333589	1	1	7303	7	0.534039	0.0774532	chr3L	3;3	8281887	8281893	FBtr0333589	FBgn0263219	Dscam4
263219	299840	1	1	524	7	1	0.00578282	chr3L	C;C	8255456	8255462	FBtr0299840	FBgn0263219	Dscam4
263219	333590	1	1	72	7	0.651555	0.0307675	chr3L	5;5	8248566	8248572	FBtr0333590	FBgn0263219	Dscam4
263219	333590	1	1	698	7	1	0.00578282	chr3L	C;C	8255456	8255462	FBtr0333590	FBgn0263219	Dscam4
264302	331508	1	1	1072	7	1	0.0162063	chr3L	3;3	7333880	7333886	FBtr0331508	FBgn0264302	CG43780
264302	331507	1	1	1087	7	1	0.0162063	chr3L	3;3	7333880	7333886	FBtr0331507	FBgn0264302	CG43780
85433	112669	1	1	1742	7	0.534039	0.00565744	chr3R	C;C	15364797	15364803	FBtr0112669	FBgn0085433	CG34404
85433	112668	1	1	1675	7	0.534039	0.00565744	chr3R	C;C	15364797	15364803	FBtr0112668	FBgn0085433	CG34404
85433	112667	1	1	2077	7	0.534039	0.00565744	chr3R	C;C	15364797	15364803	FBtr0112667	FBgn0085433	CG34404
263031	306911	1	1	652	7	0.651555	0.00910079	chr2R	5;5	22656188	22656194	FBtr0306911	FBgn0263031	CG43326
36868	330281	1	1	628	7	0.651555	0.0559789	chr3L	C;C	19388330	19388336	FBtr0330281	FBgn0036868	ms(3)76Ba
262739	87613	1	1	656	7	1	0.0675758	chr2R	C;C	13950542	13950548	FBtr0087613	FBgn0262739	AGO1
262739	87613	1	1	3259	7	1	0.0614413	chr2R	3;3	13947752	13947758	FBtr0087613	FBgn0262739	AGO1
262739	305592	1	1	913	7	1	0.0675758	chr2R	C;C	13950542	13950548	FBtr0305592	FBgn0262739	AGO1
262739	305592	1	1	3516	7	1	0.0614413	chr2R	3;3	13947752	13947758	FBtr0305592	FBgn0262739	AGO1
262739	87614	1	1	785	7	1	0.0675758	chr2R	C;C	13950542	13950548	FBtr0087614	FBgn0262739	AGO1
262739	87614	1	1	3388	7	1	0.0614413	chr2R	3;3	13947752	13947758	FBtr0087614	FBgn0262739	AGO1
262739	87612	1	1	913	7	1	0.0675758	chr2R	C;C	13950542	13950548	FBtr0087612	FBgn0262739	AGO1
262739	87612	1	1	3516	7	1	0.0614413	chr2R	3;3	13947752	13947758	FBtr0087612	FBgn0262739	AGO1
37182	78540	1	1	943	7	0.534039	0.0266107	chr3L	C;C	22715830	22715836	FBtr0078540	FBgn0037182	ArfGAP3
37182	330174	1	1	829	7	0.534039	0.0266107	chr3L	C;C	22715830	22715836	FBtr0330174	FBgn0037182	ArfGAP3
37182	330173	1	1	826	7	0.534039	0.0266107	chr3L	C;C	22715830	22715836	FBtr0330173	FBgn0037182	ArfGAP3
37182	330175	1	1	934	7	0.534039	0.0266107	chr3L	C;C	22715830	22715836	FBtr0330175	FBgn0037182	ArfGAP3
37182	113186	1	1	1216	7	0.534039	0.0266107	chr3L	C;C	22715830	22715836	FBtr0113186	FBgn0037182	ArfGAP3
37182	78539	1	1	1230	7	0.534039	0.0266107	chr3L	C;C	22715830	22715836	FBtr0078539	FBgn0037182	ArfGAP3
37182	331775	1	1	932	7	0.534039	0.0266107	chr3L	C;C	22715830	22715836	FBtr0331775	FBgn0037182	ArfGAP3
85491	112768	1	1	254	7	0.651555	0.00667233	chr3L	C;C	8329284	8329290	FBtr0112768	FBgn0085491	CG34462
34763	345500	1	1	1278	7	0.651555	0.0430879	chr2R	3;3	22672249	22672255	FBtr0345500	FBgn0034763	RYBP
34763	71868	1	1	1100	7	0.651555	0.0430879	chr2R	3;3	22672249	22672255	FBtr0071868	FBgn0034763	RYBP
31677	79029	1	1	426	7	0.534039	3.51612e-05	chr2L	3;3	5054584	5054590	FBtr0079029	FBgn0031677	CG14036
34182	331984	1	1	196	7	0.534039	0.0111583	chr2R	C;C	17045003	17045009	FBtr0331984	FBgn0034182	SmydA-7
34182	86972	1	1	53	7	0.534039	0.00345371	chr2R	C;C	17045003	17045009	FBtr0086972	FBgn0034182	SmydA-7
31474	77626	1	1	2182	7	0.534039	0.010693	chr2L	3;3	2867733	2867739	FBtr0077626	FBgn0031474	CG2991
31474	77627	1	1	2073	7	0.534039	0.010693	chr2L	3;3	2867733	2867739	FBtr0077627	FBgn0031474	CG2991
31474	77625	1	1	2272	7	0.534039	0.010693	chr2L	3;3	2867733	2867739	FBtr0077625	FBgn0031474	CG2991
4859	89178	1	1	3007	7	0.534039	0.0358356	chr4	C;C	49637	49643	FBtr0089178	FBgn0004859	ci
4859	306168	1	1	3257	7	0.534039	0.0358356	chr4	C;C	49637	49643	FBtr0306168	FBgn0004859	ci
4859	308074	1	1	2940	7	0.534039	0.0358356	chr4	3;3	49637	49643	FBtr0308074	FBgn0004859	ci
32649	80991	1	1	817	7	1	0.0755266	chr2L	C;C	17531274	17531280	FBtr0080991	FBgn0032649	CG15145
3716	79086	1	1	409	7	1	0.0386806	chr2L	C;C	5221492	5221498	FBtr0079086	FBgn0003716	tkv
3716	79088	1	1	692	7	1	0.0386806	chr2L	C;C	5221492	5221498	FBtr0079088	FBgn0003716	tkv
3716	79087	1	1	448	7	1	0.0386806	chr2L	C;C	5221492	5221498	FBtr0079087	FBgn0003716	tkv
3716	79089	1	1	1179	7	1	0.0386806	chr2L	C;C	5221492	5221498	FBtr0079089	FBgn0003716	tkv
32797	302107	1	1	1002	7	0.534039	0.140007	chr2L	C;C	19515326	19515332	FBtr0302107	FBgn0032797	Hasp
32797	302107	1	1	1985	7	0.534039	0.000834413	chr2L	C;C	19513641	19513647	FBtr0302107	FBgn0032797	Hasp
32797	302107	1	1	3813	7	0.534039	0.102562	chr2L	C;C	19511566	19511572	FBtr0302107	FBgn0032797	Hasp
32797	302107	1	1	4607	7	0.651555	0.0200059	chr2L	C;C	19510022	19510028	FBtr0302107	FBgn0032797	Hasp
32797	302108	1	1	748	7	0.534039	0.140007	chr2L	C;C	19515326	19515332	FBtr0302108	FBgn0032797	Hasp
32797	302108	1	1	1731	7	0.534039	0.000834413	chr2L	C;C	19513641	19513647	FBtr0302108	FBgn0032797	Hasp
32797	302108	1	1	3559	7	0.534039	0.102562	chr2L	C;C	19511566	19511572	FBtr0302108	FBgn0032797	Hasp
32797	302108	1	1	4353	7	0.651555	0.0200059	chr2L	C;C	19510022	19510028	FBtr0302108	FBgn0032797	Hasp
32797	81280	1	1	1002	7	0.534039	0.140007	chr2L	C;C	19515326	19515332	FBtr0081280	FBgn0032797	Hasp
32797	81280	1	1	1985	7	0.534039	0.000834413	chr2L	C;C	19513641	19513647	FBtr0081280	FBgn0032797	Hasp
32797	81280	1	1	3810	7	0.534039	0.102562	chr2L	C;C	19511566	19511572	FBtr0081280	FBgn0032797	Hasp
32797	81280	1	1	4604	7	0.651555	0.0200059	chr2L	C;C	19510022	19510028	FBtr0081280	FBgn0032797	Hasp
32797	81281	1	1	1002	7	0.534039	0.140007	chr2L	C;C	19515326	19515332	FBtr0081281	FBgn0032797	Hasp
32797	81281	1	1	1985	7	0.534039	0.000834413	chr2L	C;C	19513641	19513647	FBtr0081281	FBgn0032797	Hasp
32797	81281	1	1	3810	7	0.534039	0.102562	chr2L	C;C	19511566	19511572	FBtr0081281	FBgn0032797	Hasp
32797	299519	1	1	748	7	0.534039	0.140007	chr2L	C;C	19515326	19515332	FBtr0299519	FBgn0032797	Hasp
85390	308590	1	1	514	7	1	0.0191257	chr2R	C;C	7846897	7846903	FBtr0308590	FBgn0085390	Dgk
85390	112579	1	1	514	7	1	0.0191257	chr2R	C;C	7846897	7846903	FBtr0112579	FBgn0085390	Dgk
1254	73141	1	1	1605	7	1	0.0254057	chr3L	3;3	3511070	3511076	FBtr0073141	FBgn0001254	ImpE2
31860	309812	1	1	257	7	0.534039	0.0603941	chr2L	C;C	6803323	6803329	FBtr0309812	FBgn0031860	CG11236
31860	79339	1	1	257	7	0.534039	0.0603941	chr2L	C;C	6803323	6803329	FBtr0079339	FBgn0031860	CG11236
3401	72237	1	1	539	7	0.534039	0.0153672	chr2R	C;C	23842684	23842690	FBtr0072237	FBgn0003401	shu
39683	85454	1	1	1452	7	1	0.0172687	chr3R	C;C	29696128	29696134	FBtr0085454	FBgn0039683	dmrt99B
39510	273192	1	1	874	7	0.651555	0.029898	chr3R	C;C	27320064	27320070	FBtr0273192	FBgn0039510	CG3339
39510	273192	1	1	2799	7	0.534039	0.00373743	chr3R	C;C	27317653	27317659	FBtr0273192	FBgn0039510	CG3339
39510	273192	1	1	3444	7	1	0.00413324	chr3R	C;C	27316320	27316326	FBtr0273192	FBgn0039510	CG3339
39510	273192	1	1	3825	7	1	0.00473731	chr3R	C;C	27315711	27315717	FBtr0273192	FBgn0039510	CG3339
39510	273192	1	1	3922	7	0.651555	0.0054089	chr3R	C;C	27314509	27314515	FBtr0273192	FBgn0039510	CG3339
39510	273192	1	1	8292	7	1	0.0443616	chr3R	C;C	27307136	27307142	FBtr0273192	FBgn0039510	CG3339
39510	273192	1	1	8775	7	0.651555	0.0337687	chr3R	C;C	27306592	27306598	FBtr0273192	FBgn0039510	CG3339
41225	84346	1	1	1021	7	0.534039	0.213902	chr3R	C;C	23052710	23052716	FBtr0084346	FBgn0041225	Gr94a
29843	70873	1	1	962	7	0.651555	0.159757	chrX	C;C	6099652	6099658	FBtr0070873	FBgn0029843	Nep1
29843	340032	1	1	1151	7	0.651555	0.159757	chrX	C;C	6099652	6099658	FBtr0340032	FBgn0029843	Nep1
29843	343930	1	1	1620	7	0.651555	0.159757	chrX	C;C	6099652	6099658	FBtr0343930	FBgn0029843	Nep1
29843	70872	1	1	983	7	0.651555	0.159757	chrX	C;C	6099652	6099658	FBtr0070872	FBgn0029843	Nep1
41004	306550	1	1	730	7	0.534039	0.0500438	chr2L	C;C	2284925222849320	2284925522849320	FBtr0306550	FBgn0041004	CG17715
29501	72299	1	1	218	7	0.534039	0.0620753	chr2R	C;C	24494736	24494742	FBtr0072299	FBgn0029501	Crtp
261561	302727	1	1	170	7	0.534039	0.130936	chr3R	5;C	5816756	5816762	FBtr0302727	FBgn0261561	CG42675
11771	78510	1	1	312	7	0.534039	0.109238	chr3L	C;C	22287877	22287883	FBtr0078510	FBgn0011771	Hem
11771	78510	1	1	1730	7	0.534039	0.00891518	chr3L	C;C	22286394	22286400	FBtr0078510	FBgn0011771	Hem
11771	78510	1	1	2966	7	0.651555	0.0068925	chr3L	C;C	22285158	22285164	FBtr0078510	FBgn0011771	Hem
261570	340629	1	1	2666	7	0.534039	0.0016695	chrX	C;C	17748714	17748720	FBtr0340629	FBgn0261570	CG42684
261570	340629	1	1	2960	7	0.534039	0.419717	chrX	C;C	17749008	17749014	FBtr0340629	FBgn0261570	CG42684
261570	340629	1	1	3038	7	0.534039	0.0114289	chrX	C;C	17749086	17749092	FBtr0340629	FBgn0261570	CG42684
261570	302835	1	1	3349	7	0.534039	0.0016695	chrX	C;C	17748714	17748720	FBtr0302835	FBgn0261570	CG42684
261570	302835	1	1	3643	7	0.534039	0.419717	chrX	C;C	17749008	17749014	FBtr0302835	FBgn0261570	CG42684
261570	302835	1	1	3721	7	0.534039	0.0114289	chrX	C;C	17749086	17749092	FBtr0302835	FBgn0261570	CG42684
261570	340632	1	1	1464	7	0.534039	0.0287276	chrX	C;C	17739877	17739883	FBtr0340632	FBgn0261570	CG42684
261570	340632	1	1	4600	7	0.534039	0.0016695	chrX	C;C	17748714	17748720	FBtr0340632	FBgn0261570	CG42684
261570	340632	1	1	4894	7	0.534039	0.419717	chrX	C;C	17749008	17749014	FBtr0340632	FBgn0261570	CG42684
261570	340632	1	1	4972	7	0.534039	0.0114289	chrX	C;C	17749086	17749092	FBtr0340632	FBgn0261570	CG42684
261570	340631	1	1	3277	7	0.534039	0.0016695	chrX	C;C	17748714	17748720	FBtr0340631	FBgn0261570	CG42684
261570	340631	1	1	3571	7	0.534039	0.419717	chrX	C;C	17749008	17749014	FBtr0340631	FBgn0261570	CG42684
261570	340631	1	1	3649	7	0.534039	0.0114289	chrX	C;C	17749086	17749092	FBtr0340631	FBgn0261570	CG42684
261570	302834	1	1	3277	7	0.534039	0.0016695	chrX	C;C	17748714	17748720	FBtr0302834	FBgn0261570	CG42684
261570	302834	1	1	3571	7	0.534039	0.419717	chrX	C;C	17749008	17749014	FBtr0302834	FBgn0261570	CG42684
261570	302834	1	1	3649	7	0.534039	0.0114289	chrX	C;C	17749086	17749092	FBtr0302834	FBgn0261570	CG42684
261570	302833	1	1	1464	7	0.534039	0.0287276	chrX	C;C	17739877	17739883	FBtr0302833	FBgn0261570	CG42684
261570	302833	1	1	4600	7	0.534039	0.0016695	chrX	C;C	17748714	17748720	FBtr0302833	FBgn0261570	CG42684
261570	302833	1	1	4894	7	0.534039	0.419717	chrX	C;C	17749008	17749014	FBtr0302833	FBgn0261570	CG42684
261570	302833	1	1	4972	7	0.534039	0.0114289	chrX	C;C	17749086	17749092	FBtr0302833	FBgn0261570	CG42684
261570	302837	1	1	3376	7	0.534039	0.0016695	chrX	C;C	17748714	17748720	FBtr0302837	FBgn0261570	CG42684
261570	302837	1	1	3670	7	0.534039	0.419717	chrX	C;C	17749008	17749014	FBtr0302837	FBgn0261570	CG42684
261570	302837	1	1	3748	7	0.534039	0.0114289	chrX	C;C	17749086	17749092	FBtr0302837	FBgn0261570	CG42684
261570	340630	1	1	3304	7	0.534039	0.0016695	chrX	C;C	17748714	17748720	FBtr0340630	FBgn0261570	CG42684
261570	340630	1	1	3598	7	0.534039	0.419717	chrX	C;C	17749008	17749014	FBtr0340630	FBgn0261570	CG42684
261570	340630	1	1	3676	7	0.534039	0.0114289	chrX	C;C	17749086	17749092	FBtr0340630	FBgn0261570	CG42684
261570	302836	1	1	2666	7	0.534039	0.0016695	chrX	C;C	17748714	17748720	FBtr0302836	FBgn0261570	CG42684
261570	302836	1	1	2960	7	0.534039	0.419717	chrX	C;C	17749008	17749014	FBtr0302836	FBgn0261570	CG42684
261570	302836	1	1	3038	7	0.534039	0.0114289	chrX	C;C	17749086	17749092	FBtr0302836	FBgn0261570	CG42684
33405	332997	1	1	2197	7	1	0.00282885	chr2R	C;C	9372753	9372759	FBtr0332997	FBgn0033405	CG13954
33405	332997	1	1	5049	7	0.651555	0.0491509	chr2R	3;3	9310727	9310733	FBtr0332997	FBgn0033405	CG13954
33405	332997	1	1	5648	7	1	0.0107445	chr2R	3;3	9310128	9310134	FBtr0332997	FBgn0033405	CG13954
33405	332996	1	1	3410	7	1	0.00282885	chr2R	C;C	9372753	9372759	FBtr0332996	FBgn0033405	CG13954
33405	332996	1	1	6262	7	0.651555	0.0491509	chr2R	3;3	9310727	9310733	FBtr0332996	FBgn0033405	CG13954
33405	332996	1	1	6861	7	1	0.0107445	chr2R	3;3	9310128	9310134	FBtr0332996	FBgn0033405	CG13954
37647	82013	1	1	139	7	0.534039	0.128329	chr3R	C;C	8984112	8984118	FBtr0082013	FBgn0037647	RagA-B
259994	336689	1	1	3479	7	1	0.0247959	chrX	3;3	5629249	5629255	FBtr0336689	FBgn0259994	CG42492
262743	305585	1	1	4924	7	0.651555	0.065264	chr2L	3;3	20750295	20750301	FBtr0305585	FBgn0262743	Fs(2)Ket
262743	305586	1	1	6171	7	0.651555	0.065264	chr2L	3;3	20750295	20750301	FBtr0305586	FBgn0262743	Fs(2)Ket
262743	305587	1	1	4052	7	0.651555	0.065264	chr2L	3;3	20750295	20750301	FBtr0305587	FBgn0262743	Fs(2)Ket
259956	300302	1	1	241	7	0.534039	0.120163	chr2L	C;C	3700971	3700977	FBtr0300302	FBgn0259956	Sfp24C1
30268	346270	1	1	2174	7	0.651555	0.0199364	chrX	C;C	11132898	11132904	FBtr0346270	FBgn0030268	Klp10A
30268	73477	1	1	2082	7	0.651555	0.0199364	chrX	C;C	11132898	11132904	FBtr0073477	FBgn0030268	Klp10A
30268	73475	1	1	2086	7	0.651555	0.0199364	chrX	C;C	11132898	11132904	FBtr0073475	FBgn0030268	Klp10A
30268	73479	1	1	2250	7	0.651555	0.0199364	chrX	C;C	11132898	11132904	FBtr0073479	FBgn0030268	Klp10A
30268	73478	1	1	2461	7	0.651555	0.0199364	chrX	C;C	11132898	11132904	FBtr0073478	FBgn0030268	Klp10A
30268	73476	1	1	2086	7	0.651555	0.0199364	chrX	C;C	11132898	11132904	FBtr0073476	FBgn0030268	Klp10A
52106	307887	1	1	635	7	0.651555	0.175235	chr3L	C;C	1277802512777920	1277802612777920	FBtr0307887	FBgn0052106	CG32106
39860	85819	1	1	832	7	1	0.00349719	chr3R	C;C	31617188	31617194	FBtr0085819	FBgn0039860	CG1792
37279	345175	1	1	777	7	1	0.0316484	chr3R	5;5	48122214813260	48122264813260	FBtr0345175	FBgn0037279	CG1129
34717	71812	1	1	437	7	1	0.0240158	chr2R	5;5	22293871	22293877	FBtr0071812	FBgn0034717	CG5819
33449	88477	1	1	49	7	1	0.0787766	chr2R	5;5	9837034	9837040	FBtr0088477	FBgn0033449	CG1663
40493	82730	1	1	1174	7	1	0.0219171	chr3R	C;C	12959338	12959344	FBtr0082730	FBgn0040493	grsm
40493	344095	1	1	451	7	1	0.00766619	chr3R	C;C	12967180	12967186	FBtr0344095	FBgn0040493	grsm
40493	344095	1	1	1451	7	1	0.0219171	chr3R	C;C	12959338	12959344	FBtr0344095	FBgn0040493	grsm
1122	88272	1	1	1094	7	0.651555	0.0078939	chr2R	C;C	10461206	10461212	FBtr0088272	FBgn0001122	Galphao
1122	88272	1	1	2910	7	0.534039	0.0371796	chr2R	3;3	10463155	10463161	FBtr0088272	FBgn0001122	Galphao
1122	88272	1	1	3906	7	0.651555	0.0171845	chr2R	3;3	10464151	10464157	FBtr0088272	FBgn0001122	Galphao
1122	88268	1	1	946	7	0.651555	0.0078939	chr2R	C;C	10461206	10461212	FBtr0088268	FBgn0001122	Galphao
1122	333064	1	1	437	7	0.651555	0.0078939	chr2R	C;C	10461206	10461212	FBtr0333064	FBgn0001122	Galphao
1122	88270	1	1	974	7	0.651555	0.0078939	chr2R	C;C	10461206	10461212	FBtr0088270	FBgn0001122	Galphao
1122	88264	1	1	964	7	0.651555	0.0078939	chr2R	C;C	10461206	10461212	FBtr0088264	FBgn0001122	Galphao
1122	88265	1	1	1019	7	0.651555	0.0078939	chr2R	C;C	10461206	10461212	FBtr0088265	FBgn0001122	Galphao
1122	88266	1	1	1082	7	0.651555	0.0078939	chr2R	C;C	10461206	10461212	FBtr0088266	FBgn0001122	Galphao
1122	88266	1	1	2898	7	0.534039	0.0371796	chr2R	3;3	10463155	10463161	FBtr0088266	FBgn0001122	Galphao
1122	88271	1	1	846	7	0.651555	0.0078939	chr2R	C;C	10461206	10461212	FBtr0088271	FBgn0001122	Galphao
1122	88269	1	1	864	7	0.651555	0.0078939	chr2R	C;C	10461206	10461212	FBtr0088269	FBgn0001122	Galphao
1122	88267	1	1	891	7	0.651555	0.0078939	chr2R	C;C	10461206	10461212	FBtr0088267	FBgn0001122	Galphao
29936	71019	1	1	1252	7	0.651555	0.0524633	chrX	C;C	7103115	7103121	FBtr0071019	FBgn0029936	CG4617
29936	331308	1	1	1252	7	0.651555	0.0524633	chrX	C;C	7103115	7103121	FBtr0331308	FBgn0029936	CG4617
264075	82005	1	1	723	7	0.534039	0.00325901	chr3R	C;C	9019151	9019157	FBtr0082005	FBgn0264075	tgo
264075	336755	1	1	723	7	0.534039	0.00325901	chr3R	C;C	9019151	9019157	FBtr0336755	FBgn0264075	tgo
34447	86535	1	1	48	7	1	0.0748051	chr2R	5;5	19452552	19452558	FBtr0086535	FBgn0034447	CG7744
34447	86535	1	1	1445	7	0.534039	0.00518475	chr2R	C;C	19454388	19454394	FBtr0086535	FBgn0034447	CG7744
30587	73986	1	1	556	7	0.534039	0.0429733	chrX	C;C	14848100	14848106	FBtr0073986	FBgn0030587	CG9522
37466	305315	1	1	2242	7	1	0.00763749	chr3R	3;3	7070462	7070468	FBtr0305315	FBgn0037466	CG1965
37466	81634	1	1	2146	7	1	0.00763749	chr3R	C;C	7070462	7070468	FBtr0081634	FBgn0037466	CG1965
37466	334667	1	1	2151	7	1	0.00763749	chr3R	3;3	7070462	7070468	FBtr0334667	FBgn0037466	CG1965
262511	87176	1	1	929	7	1	0.0551873	chr2R	C;C	16326599	16326605	FBtr0087176	FBgn0262511	Vha44
262511	290031	1	1	520	7	0.534039	0.0239266	chr2R	C;C	16330372	16330378	FBtr0290031	FBgn0262511	Vha44
262511	290031	1	1	2273	7	1	0.0551873	chr2R	C;C	16326599	16326605	FBtr0290031	FBgn0262511	Vha44
262511	290032	1	1	465	7	0.534039	0.0239266	chr2R	C;C	16330372	16330378	FBtr0290032	FBgn0262511	Vha44
262511	290032	1	1	2218	7	1	0.0551873	chr2R	C;C	16326599	16326605	FBtr0290032	FBgn0262511	Vha44
262511	87175	1	1	520	7	0.534039	0.0239266	chr2R	C;C	16330372	16330378	FBtr0087175	FBgn0262511	Vha44
262511	87175	1	1	1091	7	1	0.0551873	chr2R	C;C	16326599	16326605	FBtr0087175	FBgn0262511	Vha44
262511	87173	1	1	874	7	1	0.0551873	chr2R	C;C	16326599	16326605	FBtr0087173	FBgn0262511	Vha44
50104	86928	1	1	254	7	1	0.0435022	chr2R	C;C	17491061	17491067	FBtr0086928	FBgn0050104	NT5E-2
50104	86927	1	1	152	7	1	0.0435022	chr2R	C;C	17491061	17491067	FBtr0086927	FBgn0050104	NT5E-2
265575	340203	1	1	116	7	0.534039	0.0169755	chrX	5;C	3869761	3869767	FBtr0340203	FBgn0265575	yin
38902	84132	1	1	364	7	0.651555	0.00152131	chr3R	C;C	21776555	21776561	FBtr0084132	FBgn0038902	CG6800
35137	72549	1	1	4026	7	0.534039	0.686759	chr3L	3;3	365644	365650	FBtr0072549	FBgn0035137	CG1233
35137	72548	1	1	3973	7	0.534039	0.686759	chr3L	3;3	365644	365650	FBtr0072548	FBgn0035137	CG1233
37940	82428	1	1	407	7	0.534039	0.0415518	chr3R	C;C	11712125	11712131	FBtr0082428	FBgn0037940	CG14720
263397	290292	1	1	399	7	1	0.039641	chr2R	C;C	14291768	14291774	FBtr0290292	FBgn0263397	Ih
263397	290292	1	1	709	7	1	0.192505	chr2R	C;C	14292269	14292275	FBtr0290292	FBgn0263397	Ih
263397	290292	1	1	867	7	0.651555	0.0392209	chr2R	C;C	14296746	14296752	FBtr0290292	FBgn0263397	Ih
263397	308836	1	1	542	7	1	0.039641	chr2R	C;C	14291768	14291774	FBtr0308836	FBgn0263397	Ih
263397	308836	1	1	852	7	1	0.192505	chr2R	C;C	14292269	14292275	FBtr0308836	FBgn0263397	Ih
263397	308836	1	1	1010	7	0.651555	0.0392209	chr2R	C;C	14296746	14296752	FBtr0308836	FBgn0263397	Ih
263397	100370	1	1	5004	7	1	0.039641	chr2R	C;C	14291768	14291774	FBtr0100370	FBgn0263397	Ih
263397	100370	1	1	5314	7	1	0.192505	chr2R	C;C	14292269	14292275	FBtr0100370	FBgn0263397	Ih
263397	100370	1	1	5472	7	0.651555	0.0392209	chr2R	C;C	14296746	14296752	FBtr0100370	FBgn0263397	Ih
263397	290111	1	1	4962	7	1	0.039641	chr2R	C;C	14291768	14291774	FBtr0290111	FBgn0263397	Ih
263397	290111	1	1	5287	7	1	0.137246	chr2R	C;C	14292269	14292275	FBtr0290111	FBgn0263397	Ih
263397	290109	1	1	4962	7	1	0.039641	chr2R	C;C	14291768	14291774	FBtr0290109	FBgn0263397	Ih
263397	290109	1	1	5287	7	1	0.137246	chr2R	C;C	14292269	14292275	FBtr0290109	FBgn0263397	Ih
263397	290109	1	1	5445	7	0.651555	0.0392209	chr2R	C;C	14296746	14296752	FBtr0290109	FBgn0263397	Ih
263397	290110	1	1	4962	7	1	0.039641	chr2R	C;C	14291768	14291774	FBtr0290110	FBgn0263397	Ih
263397	290110	1	1	5272	7	1	0.192505	chr2R	C;C	14292269	14292275	FBtr0290110	FBgn0263397	Ih
263397	290110	1	1	5526	7	0.651555	0.0506237	chr2R	C;C	14296746	14296752	FBtr0290110	FBgn0263397	Ih
263397	100369	1	1	5716	7	1	0.039641	chr2R	C;C	14291768	14291774	FBtr0100369	FBgn0263397	Ih
263397	100369	1	1	6026	7	1	0.192505	chr2R	C;C	14292269	14292275	FBtr0100369	FBgn0263397	Ih
263397	100369	1	1	6184	7	0.651555	0.0392209	chr2R	C;C	14296746	14296752	FBtr0100369	FBgn0263397	Ih
263397	308837	1	1	540	7	1	0.039641	chr2R	C;C	14291768	14291774	FBtr0308837	FBgn0263397	Ih
263397	308837	1	1	865	7	1	0.137246	chr2R	C;C	14292269	14292275	FBtr0308837	FBgn0263397	Ih
263397	308834	1	1	540	7	1	0.039641	chr2R	C;C	14291768	14291774	FBtr0308834	FBgn0263397	Ih
263397	308834	1	1	850	7	1	0.192505	chr2R	C;C	14292269	14292275	FBtr0308834	FBgn0263397	Ih
263397	308834	1	1	1008	7	0.651555	0.0392209	chr2R	C;C	14296746	14296752	FBtr0308834	FBgn0263397	Ih
263397	308835	1	1	501	7	1	0.039641	chr2R	C;C	14291768	14291774	FBtr0308835	FBgn0263397	Ih
263397	308835	1	1	811	7	1	0.192505	chr2R	C;C	14292269	14292275	FBtr0308835	FBgn0263397	Ih
263397	308835	1	1	969	7	0.651555	0.0392209	chr2R	C;C	14296746	14296752	FBtr0308835	FBgn0263397	Ih
263397	100372	1	1	4962	7	1	0.039641	chr2R	C;C	14291768	14291774	FBtr0100372	FBgn0263397	Ih
263397	100372	1	1	5287	7	1	0.137246	chr2R	C;C	14292269	14292275	FBtr0100372	FBgn0263397	Ih
263397	100372	1	1	5541	7	0.651555	0.0506237	chr2R	C;C	14296746	14296752	FBtr0100372	FBgn0263397	Ih
3292	76146	1	1	1612	7	1	0.00488202	chr3L	C;C	11585830	11585836	FBtr0076146	FBgn0003292	rt
260945	300561	1	1	2919	7	0.534039	0.0150069	chr3L	C;C	12785773	12785779	FBtr0300561	FBgn0260945	Atg1
260945	75945	1	1	2859	7	0.534039	0.0150069	chr3L	C;C	12785773	12785779	FBtr0075945	FBgn0260945	Atg1
3248	83697	1	1	499	7	0.651555	0.00143958	chr3R	C;C	18900018	18900024	FBtr0083697	FBgn0003248	Rh2
283467	336864	1	1	68	7	0.651555	0.00696983	chr2L	C;C	15256230	15256236	FBtr0336864	FBgn0283467	Pol32
283467	303164	1	1	68	7	0.651555	0.00696983	chr2L	C;C	15256230	15256236	FBtr0303164	FBgn0283467	Pol32
37810	82231	1	1	92	7	1	0.0611913	chr3R	5;5	10333207	10333213	FBtr0082231	FBgn0037810	sle
35205	72669	1	1	1587	7	0.534039	0.0989872	chr3L	C;C	1309315	1309321	FBtr0072669	FBgn0035205	Ctr9
35205	72669	1	1	2270	7	0.651555	0.00645973	chr3L	C;C	1310061	1310067	FBtr0072669	FBgn0035205	Ctr9
35205	72668	1	1	1655	7	0.534039	0.0989872	chr3L	C;C	1309315	1309321	FBtr0072668	FBgn0035205	Ctr9
35205	72668	1	1	2338	7	0.651555	0.00645973	chr3L	C;C	1310061	1310067	FBtr0072668	FBgn0035205	Ctr9
30891	339540	1	1	592	7	0.534039	0.0157489	chrX	C;C	18086353	18086359	FBtr0339540	FBgn0030891	Ada3
30891	339540	1	1	967	7	1	0.0291133	chrX	C;C	18086728	18086734	FBtr0339540	FBgn0030891	Ada3
30891	74510	1	1	592	7	0.534039	0.0157489	chrX	C;C	18086353	18086359	FBtr0074510	FBgn0030891	Ada3
30891	74510	1	1	967	7	1	0.0291133	chrX	C;C	18086728	18086734	FBtr0074510	FBgn0030891	Ada3
259163	331540	1	1	1405	7	0.534039	0.176133	chr3L	C;C	9749208	9749214	FBtr0331540	FBgn0259163	CG42268
259163	331540	1	1	1409	7	1	0.0044914	chr3L	C;C	9749204	9749210	FBtr0331540	FBgn0259163	CG42268
259163	299606	1	1	315	7	1	0.00517213	chr3L	5;5	9760074	9760080	FBtr0299606	FBgn0259163	CG42268
259163	299606	1	1	1726	7	0.534039	0.176133	chr3L	C;C	9749208	9749214	FBtr0299606	FBgn0259163	CG42268
259163	299606	1	1	1730	7	1	0.0044914	chr3L	C;C	9749204	9749210	FBtr0299606	FBgn0259163	CG42268
259163	301858	1	1	1405	7	0.534039	0.176133	chr3L	C;C	9749208	9749214	FBtr0301858	FBgn0259163	CG42268
259163	301858	1	1	1409	7	1	0.0044914	chr3L	C;C	9749204	9749210	FBtr0301858	FBgn0259163	CG42268
259163	331537	1	1	1565	7	0.534039	0.176133	chr3L	C;C	9749208	9749214	FBtr0331537	FBgn0259163	CG42268
259163	331537	1	1	1569	7	1	0.0044914	chr3L	C;C	9749204	9749210	FBtr0331537	FBgn0259163	CG42268
259163	299607	1	1	1405	7	0.534039	0.176133	chr3L	C;C	9749208	9749214	FBtr0299607	FBgn0259163	CG42268
259163	299607	1	1	1409	7	1	0.0044914	chr3L	C;C	9749204	9749210	FBtr0299607	FBgn0259163	CG42268
259163	331541	1	1	1405	7	0.534039	0.176133	chr3L	C;C	9749208	9749214	FBtr0331541	FBgn0259163	CG42268
259163	331541	1	1	1409	7	1	0.0044914	chr3L	C;C	9749204	9749210	FBtr0331541	FBgn0259163	CG42268
13765	87704	1	1	2754	7	1	0.00876717	chr2R	C;C	13441237	13441243	FBtr0087704	FBgn0013765	cnn
13765	309889	1	1	2963	7	1	0.00876717	chr2R	C;C	13441237	13441243	FBtr0309889	FBgn0013765	cnn
13765	309893	1	1	2443	7	1	0.00876717	chr2R	C;C	13441237	13441243	FBtr0309893	FBgn0013765	cnn
13765	309892	1	1	2532	7	1	0.00876717	chr2R	C;C	13441237	13441243	FBtr0309892	FBgn0013765	cnn
13765	100654	1	1	2273	7	1	0.00876717	chr2R	C;C	13441237	13441243	FBtr0100654	FBgn0013765	cnn
13765	87703	1	1	2455	7	1	0.00876717	chr2R	C;C	13441237	13441243	FBtr0087703	FBgn0013765	cnn
13765	100656	1	1	2784	7	1	0.00876717	chr2R	C;C	13441237	13441243	FBtr0100656	FBgn0013765	cnn
13765	309891	1	1	3145	7	1	0.00876717	chr2R	C;C	13441237	13441243	FBtr0309891	FBgn0013765	cnn
23527	70398	1	1	1818	7	1	0.00582594	chrX	3;3	2264723	2264729	FBtr0070398	FBgn0023527	CG3071
35204	331867	1	1	1012	7	0.534039	0.0115089	chr3L	C;C	1306400	1306406	FBtr0331867	FBgn0035204	CG2277
35204	345006	1	1	706	7	0.534039	0.0115089	chr3L	C;C	1306400	1306406	FBtr0345006	FBgn0035204	CG2277
35204	72729	1	1	1012	7	0.534039	0.0115089	chr3L	C;C	1306400	1306406	FBtr0072729	FBgn0035204	CG2277
34440	86523	1	1	1686	7	0.651555	0.0310017	chr2R	C;C	19383658	19383664	FBtr0086523	FBgn0034440	CG10073
34440	310321	1	1	1682	7	0.651555	0.0310017	chr2R	C;C	19383658	19383664	FBtr0310321	FBgn0034440	CG10073
51358	82554	1	1	1749	7	1	0.121223	chr3R	3;3	12029760	12029766	FBtr0082554	FBgn0051358	CG31358
51358	339640	1	1	1749	7	1	0.116778	chr3R	3;3	12029760	12029766	FBtr0339640	FBgn0051358	CG31358
51358	339640	1	1	1851	7	1	0.208279	chr3R	3;3	12027857	12027863	FBtr0339640	FBgn0051358	CG31358
711	71447	1	1	1729	7	0.651555	0.0323263	chrX	3;3	10407664	10407670	FBtr0071447	FBgn0000711	flw
711	333305	1	1	1729	7	0.651555	0.0323263	chrX	3;3	10407664	10407670	FBtr0333305	FBgn0000711	flw
711	71446	1	1	2122	7	0.651555	0.0323263	chrX	3;3	10407664	10407670	FBtr0071446	FBgn0000711	flw
39420	300399	1	1	1930	7	1	0.00955361	chr3R	3;3	26275106	26275112	FBtr0300399	FBgn0039420	CG6154
38490	83409	1	1	546	7	0.534039	0.00971071	chr3R	C;C	17151194	17151200	FBtr0083409	FBgn0038490	CG5285
34470	345676	1	1	75	7	1	0.0103753	chr2R	5;5	19703834	19703840	FBtr0345676	FBgn0034470	Obp56d
52082	76216	1	1	4545	7	1	0.0808266	chr3L	3;3	11163284	11163290	FBtr0076216	FBgn0052082	IRSp53
36890	74942	1	1	141	7	1	0.0156536	chr3L	C;C	19601774	19601780	FBtr0074942	FBgn0036890	CG9368
36890	74944	1	1	141	7	1	0.0156536	chr3L	C;C	19601774	19601780	FBtr0074944	FBgn0036890	CG9368
36890	336786	1	1	141	7	1	0.0156536	chr3L	C;C	19601774	19601780	FBtr0336786	FBgn0036890	CG9368
36890	336786	1	1	855	7	0.651555	0.0354847	chr3L	3;3	19602553	19602559	FBtr0336786	FBgn0036890	CG9368
28647	300735	1	1	2426	7	0.651555	0.01987	chr3R	C;C	25337914	25337920	FBtr0300735	FBgn0028647	CG11902
35643	77027	1	1	121	7	0.534039	0.0300559	chr3L	C;C	5882425	5882431	FBtr0077027	FBgn0035643	CG13287
35643	77027	1	1	1037	7	1	0.159959	chr3L	C;C	5883341	5883347	FBtr0077027	FBgn0035643	CG13287
35643	330086	1	1	121	7	0.534039	0.0300559	chr3L	C;C	5882425	5882431	FBtr0330086	FBgn0035643	CG13287
35643	330086	1	1	1037	7	1	0.159959	chr3L	C;C	5883341	5883347	FBtr0330086	FBgn0035643	CG13287
39959	113748	1	1	1505	7	1	0.00317142	chr3L	C;C	27973760	27973766	FBtr0113748	FBgn0039959	CG17514
37239	78914	1	1	995	7	1	0.0176498	chr3R	C;C	4380257	4380263	FBtr0078914	FBgn0037239	Sfxn1-3
37239	78913	1	1	715	7	1	0.0176498	chr3R	C;C	4380257	4380263	FBtr0078913	FBgn0037239	Sfxn1-3
37239	78916	1	1	728	7	1	0.0176498	chr3R	C;C	4380257	4380263	FBtr0078916	FBgn0037239	Sfxn1-3
37239	78915	1	1	670	7	1	0.0176498	chr3R	C;C	4380257	4380263	FBtr0078915	FBgn0037239	Sfxn1-3
4842	345268	1	1	1911	7	1	0.0829781	chr3R	3;3	27057234	27057240	FBtr0345268	FBgn0004842	RYa-R
4811	81316	1	1	1325	7	1	0.0164322	chr2L	3;3	19792779	19792785	FBtr0081316	FBgn0004811	fs(2)ltoPP43
266136	302282	1	1	136	7	0.651555	0.0785634	chr3L	5;5	19791584	19791590	FBtr0302282	FBgn0266136	Gyc76C
39536	330108	1	1	2445	7	0.534039	8.37702e-05	chr3R	C;C	27667723	27667729	FBtr0330108	FBgn0039536	unc80
39536	330112	1	1	2445	7	0.534039	8.37702e-05	chr3R	C;C	27667723	27667729	FBtr0330112	FBgn0039536	unc80
39536	330110	1	1	2454	7	0.534039	8.37702e-05	chr3R	C;C	27667723	27667729	FBtr0330110	FBgn0039536	unc80
39536	330111	1	1	2463	7	0.534039	8.37702e-05	chr3R	C;C	27667723	27667729	FBtr0330111	FBgn0039536	unc80
39536	330109	1	1	2385	7	0.534039	8.37702e-05	chr3R	C;C	27667723	27667729	FBtr0330109	FBgn0039536	unc80
260934	330244	1	1	5572	7	0.534039	0.159885	chr2R	3;3	19485180	19485186	FBtr0330244	FBgn0260934	par-1
260934	100393	1	1	1880	7	0.534039	0.0134838	chr2R	3;3	19466373	19466379	FBtr0100393	FBgn0260934	par-1
33658	88062	1	1	34	7	0.534039	0.0313861	chr2R	5;C	11863212	11863218	FBtr0088062	FBgn0033658	Twdlbeta
39469	85075	1	1	439	7	0.534039	0.0101939	chr3R	C;C	26995486	26995492	FBtr0085075	FBgn0039469	TwdlC
33906	302452	1	1	689	7	1	0.0296291	chr2R	C;C	14172602	14172608	FBtr0302452	FBgn0033906	CG8331
33906	302451	1	1	543	7	1	0.0296291	chr2R	C;C	14172602	14172608	FBtr0302451	FBgn0033906	CG8331
33906	302453	1	1	512	7	1	0.0296291	chr2R	C;C	14172602	14172608	FBtr0302453	FBgn0033906	CG8331
33906	87525	1	1	512	7	1	0.0296291	chr2R	C;C	14172602	14172608	FBtr0087525	FBgn0033906	CG8331
11230	79545	1	1	2734	7	0.534039	0.015907	chr2L	C;C	8068325	8068331	FBtr0079545	FBgn0011230	poe
11230	79545	1	1	3058	7	0.534039	0.0174871	chr2L	C;C	8067940	8067946	FBtr0079545	FBgn0011230	poe
11230	79545	1	1	6985	7	0.534039	0.0827484	chr2L	C;C	8063944	8063950	FBtr0079545	FBgn0011230	poe
11230	79545	1	1	10766	7	0.534039	0.00672758	chr2L	C;C	8059996	8060002	FBtr0079545	FBgn0011230	poe
11230	79545	1	1	12223	7	1	0.0114308	chr2L	C;C	8058483	8058489	FBtr0079545	FBgn0011230	poe
11230	79545	1	1	14519	7	0.534039	0.00762606	chr2L	C;C	8056075	8056081	FBtr0079545	FBgn0011230	poe
11230	79545	1	1	15244	7	0.651555	0.0313581	chr2L	C;C	8055350	8055356	FBtr0079545	FBgn0011230	poe
11230	79545	1	1	15314	7	0.651555	0.0118499	chr2L	C;C	8055280	8055286	FBtr0079545	FBgn0011230	poe
11230	333088	1	1	2734	7	0.534039	0.015907	chr2L	C;C	8068325	8068331	FBtr0333088	FBgn0011230	poe
11230	333088	1	1	3058	7	0.534039	0.0174871	chr2L	C;C	8067940	8067946	FBtr0333088	FBgn0011230	poe
11230	333088	1	1	6985	7	0.534039	0.0827484	chr2L	C;C	8063944	8063950	FBtr0333088	FBgn0011230	poe
11230	333088	1	1	10766	7	0.534039	0.00672758	chr2L	C;C	8059996	8060002	FBtr0333088	FBgn0011230	poe
11230	333088	1	1	12223	7	1	0.0114308	chr2L	C;C	8058483	8058489	FBtr0333088	FBgn0011230	poe
11230	333088	1	1	14519	7	0.534039	0.00762606	chr2L	C;C	8056075	8056081	FBtr0333088	FBgn0011230	poe
11230	333088	1	1	15244	7	0.651555	0.0313581	chr2L	C;C	8055350	8055356	FBtr0333088	FBgn0011230	poe
11230	333088	1	1	15314	7	0.651555	0.0118499	chr2L	C;C	8055280	8055286	FBtr0333088	FBgn0011230	poe
24326	334320	1	1	1616	7	0.534039	0.0642035	chr3R	3;3	8648659	8648665	FBtr0334320	FBgn0024326	Mkk4
24326	334320	1	1	2932	7	0.534039	0.0256345	chr3R	3;3	8647343	8647349	FBtr0334320	FBgn0024326	Mkk4
24326	300443	1	1	1616	7	0.534039	0.0642035	chr3R	3;3	8648659	8648665	FBtr0300443	FBgn0024326	Mkk4
24326	81892	1	1	1616	7	0.534039	0.0642035	chr3R	3;3	8648659	8648665	FBtr0081892	FBgn0024326	Mkk4
28496	86721	1	1	3031	7	0.534039	0.0031816	chr2R	C;C	18469600	18469606	FBtr0086721	FBgn0028496	CG30116
28496	86718	1	1	2908	7	0.534039	0.0031816	chr2R	C;C	18469600	18469606	FBtr0086718	FBgn0028496	CG30116
28496	86719	1	1	2908	7	0.534039	0.0031816	chr2R	C;C	18469600	18469606	FBtr0086719	FBgn0028496	CG30116
28496	86719	1	1	6437	7	1	0.0290117	chr2R	3;3	18456863	18456869	FBtr0086719	FBgn0028496	CG30116
28496	86720	1	1	3031	7	0.534039	0.0031816	chr2R	C;C	18469600	18469606	FBtr0086720	FBgn0028496	CG30116
53144	302517	1	1	962	7	1	0.0667244	chr2R	C;C	10757359	10757365	FBtr0302517	FBgn0053144	CG33144
53144	302517	1	1	1874	7	1	0.0241597	chr2R	C;C	10756320	10756326	FBtr0302517	FBgn0053144	CG33144
53144	302517	1	1	3292	7	1	0.00600242	chr2R	C;C	10742067	10742073	FBtr0302517	FBgn0053144	CG33144
53144	88254	1	1	782	7	1	0.0667244	chr2R	C;C	10757359	10757365	FBtr0088254	FBgn0053144	CG33144
53144	88254	1	1	1694	7	1	0.0241597	chr2R	C;C	10756320	10756326	FBtr0088254	FBgn0053144	CG33144
53144	88254	1	1	3112	7	1	0.00600242	chr2R	C;C	10742067	10742073	FBtr0088254	FBgn0053144	CG33144
29945	71051	1	1	901	7	1	0.0066736	chrX	C;C	7330110	7330116	FBtr0071051	FBgn0029945	CG18155
33543	345662	1	1	226	7	0.534039	0.0140144	chr2R	5;5	10730917	10730923	FBtr0345662	FBgn0033543	CG12338
35025	72308	1	1	2100	7	0.651555	0.0298527	chr2R	C;C	24567832	24567838	FBtr0072308	FBgn0035025	uri
35187	72638	1	1	849	7	1	0.0826925	chr3L	C;C	1192062	1192068	FBtr0072638	FBgn0035187	Trh
35187	72638	1	1	1317	7	0.534039	0.00389632	chr3L	C;C	1191302	1191308	FBtr0072638	FBgn0035187	Trh
31856	290242	1	1	1349	7	0.534039	0.000918817	chr2L	C;C	6758273	6758279	FBtr0290242	FBgn0031856	CG11322
25835	300673	1	1	691	7	0.651555	0.00204914	chrX	C;C	147181	147187	FBtr0300673	FBgn0025835	CG17707
25835	300673	1	1	2321	7	1	0.00849992	chrX	C;C	145219	145225	FBtr0300673	FBgn0025835	CG17707
25835	300673	1	1	2784	7	0.651555	0.143412	chrX	C;C	144634	144640	FBtr0300673	FBgn0025835	CG17707
25835	340051	1	1	691	7	0.651555	0.00204914	chrX	C;C	147181	147187	FBtr0340051	FBgn0025835	CG17707
25835	340051	1	1	2318	7	1	0.00849992	chrX	C;C	145219	145225	FBtr0340051	FBgn0025835	CG17707
25835	340051	1	1	2781	7	0.651555	0.143412	chrX	C;C	144634	144640	FBtr0340051	FBgn0025835	CG17707
32025	345779	1	1	2116	7	1	0.364159	chr2L	3;3	8351077	8351083	FBtr0345779	FBgn0032025	CG7778
35790	332140	1	1	1314	7	0.534039	0.0705347	chr3L	C;C	7493344	7493350	FBtr0332140	FBgn0035790	Cyp316a1
52369	76783	1	1	1346	7	1	0.0378979	chr3L	C;C	7803323	7803329	FBtr0076783	FBgn0052369	CG32369
52369	304992	1	1	2207	7	1	0.0378979	chr3L	C;C	7803323	7803329	FBtr0304992	FBgn0052369	CG32369
11300	88658	1	1	4205	7	1	0.0635695	chr2R	3;3	8962163	8962169	FBtr0088658	FBgn0011300	babo
11300	300599	1	1	4124	7	1	0.0635695	chr2R	3;3	8962163	8962169	FBtr0300599	FBgn0011300	babo
11300	88659	1	1	4142	7	1	0.0635695	chr2R	3;3	8962163	8962169	FBtr0088659	FBgn0011300	babo
13759	301327	1	1	6439	7	1	0.0212781	chr3R	3;3	21783498	21783504	FBtr0301327	FBgn0013759	CASK
454	82831	1	1	1316	7	0.651555	0.00964259	chr3R	C;C	13784959	13784965	FBtr0082831	FBgn0000454	Dip-B
454	82833	1	1	1220	7	0.651555	0.00964259	chr3R	C;C	13784959	13784965	FBtr0082833	FBgn0000454	Dip-B
454	345229	1	1	1095	7	0.651555	0.00964259	chr3R	C;C	13784959	13784965	FBtr0345229	FBgn0000454	Dip-B
454	82832	1	1	1329	7	0.651555	0.00964259	chr3R	C;C	13784959	13784965	FBtr0082832	FBgn0000454	Dip-B
31260	78080	1	1	1075	7	0.534039	0.0234358	chr2L	C;C	543506	543512	FBtr0078080	FBgn0031260	Spp
10385	88432	1	1	115	7	0.651555	0.000961098	chr2R	C;C	10054455	10054461	FBtr0088432	FBgn0010385	Def
26370	87383	1	1	1353	7	0.651555	0.20556	chr2R	C;C	15383888	15383894	FBtr0087383	FBgn0026370	SRPK
26370	87383	1	1	2306	7	1	0.0742209	chr2R	C;C	15385037	15385043	FBtr0087383	FBgn0026370	SRPK
26370	87384	1	1	1348	7	0.651555	0.20556	chr2R	C;C	15383888	15383894	FBtr0087384	FBgn0026370	SRPK
26370	87384	1	1	2301	7	1	0.0742209	chr2R	C;C	15385037	15385043	FBtr0087384	FBgn0026370	SRPK
26370	87384	1	1	4662	7	0.534039	0.0602352	chr2R	3;3	15387398	15387404	FBtr0087384	FBgn0026370	SRPK
26370	330628	1	1	1353	7	0.651555	0.20556	chr2R	C;C	15383888	15383894	FBtr0330628	FBgn0026370	SRPK
26370	330628	1	1	2306	7	1	0.0742209	chr2R	C;C	15385037	15385043	FBtr0330628	FBgn0026370	SRPK
26370	87385	1	1	715	7	0.651555	0.20556	chr2R	C;C	15383888	15383894	FBtr0087385	FBgn0026370	SRPK
26370	87385	1	1	1668	7	1	0.0742209	chr2R	C;C	15385037	15385043	FBtr0087385	FBgn0026370	SRPK
26370	87385	1	1	4029	7	0.534039	0.0602352	chr2R	3;3	15387398	15387404	FBtr0087385	FBgn0026370	SRPK
36747	75195	1	1	613	7	0.534039	0.0161263	chr3L	C;C	17728625	17728631	FBtr0075195	FBgn0036747	CG6052
250871	305609	1	1	3290	7	0.651555	0.0627676	chrX	3;3	11908431	11908437	FBtr0305609	FBgn0250871	pot
250871	73594	1	1	3290	7	0.651555	0.0627676	chrX	3;3	11908431	11908437	FBtr0073594	FBgn0250871	pot
250871	73595	1	1	3325	7	0.651555	0.0627676	chrX	3;3	11908431	11908437	FBtr0073595	FBgn0250871	pot
24366	70238	1	1	623	7	0.534039	0.0582823	chrX	C;C	1333345	1333351	FBtr0070238	FBgn0024366	CG11409
24366	70238	1	1	3210	7	0.651555	0.0204589	chrX	C;C	1330758	1330764	FBtr0070238	FBgn0024366	CG11409
24366	342730	1	1	563	7	0.534039	0.0582823	chrX	C;C	1333345	1333351	FBtr0342730	FBgn0024366	CG11409
24366	342730	1	1	3150	7	0.651555	0.0204589	chrX	C;C	1330758	1330764	FBtr0342730	FBgn0024366	CG11409
261984	113248	1	1	1370	7	0.534039	0.00304121	chr3R	C;C	19856714	19856720	FBtr0113248	FBgn0261984	Ire1
2905	82662	1	1	2409	7	1	0.199002	chr3R	C;C	12709763	12709769	FBtr0082662	FBgn0002905	mus308
24754	87351	1	1	1501	7	1	0.0427449	chr2R	C;C	15566581	15566587	FBtr0087351	FBgn0024754	Flo1
24754	87352	1	1	1513	7	1	0.0427449	chr2R	C;C	15566581	15566587	FBtr0087352	FBgn0024754	Flo1
34964	72168	1	1	3530	7	0.534039	0.195283	chr2R	C;C	24041588	24041594	FBtr0072168	FBgn0034964	IntS1
34964	72168	1	1	4181	7	1	0.00612088	chr2R	C;C	24042239	24042245	FBtr0072168	FBgn0034964	IntS1
34093	344080	1	1	101	7	1	0.000448571	chr2R	5;5	16226145	16226151	FBtr0344080	FBgn0034093	CG15706
34093	344080	1	1	1528	7	0.651555	0.0022966	chr2R	C;C	16223734	16223740	FBtr0344080	FBgn0034093	CG15706
34093	344079	1	1	2055	7	0.651555	0.0022966	chr2R	C;C	16223734	16223740	FBtr0344079	FBgn0034093	CG15706
34093	340024	1	1	1335	7	0.651555	0.0022966	chr2R	C;C	16223734	16223740	FBtr0340024	FBgn0034093	CG15706
34093	87191	1	1	1937	7	0.651555	0.0022966	chr2R	C;C	16223734	16223740	FBtr0087191	FBgn0034093	CG15706
34093	344081	1	1	327	7	1	0.0356158	chr2R	5;5	16226796	16226802	FBtr0344081	FBgn0034093	CG15706
34093	344081	1	1	1896	7	0.651555	0.0022966	chr2R	C;C	16223734	16223740	FBtr0344081	FBgn0034093	CG15706
36451	333075	1	1	259	7	0.651555	0.237791	chr3L	5;5	14792083	14792089	FBtr0333075	FBgn0036451	CG9425
36451	333075	1	1	3799	7	1	0.032261	chr3L	C;C	14796301	14796307	FBtr0333075	FBgn0036451	CG9425
36451	333074	1	1	199	7	0.651555	0.237791	chr3L	5;5	14792083	14792089	FBtr0333074	FBgn0036451	CG9425
36451	333074	1	1	3739	7	1	0.032261	chr3L	C;C	14796301	14796307	FBtr0333074	FBgn0036451	CG9425
36451	75693	1	1	283	7	0.651555	0.237791	chr3L	5;5	14792083	14792089	FBtr0075693	FBgn0036451	CG9425
36451	75693	1	1	3823	7	1	0.032261	chr3L	C;C	14796301	14796307	FBtr0075693	FBgn0036451	CG9425
31952	343423	1	1	773	7	1	0.0438653	chr2L	C;C	7806788	7806794	FBtr0343423	FBgn0031952	cdc14
31952	343423	1	1	791	7	0.651555	0.00154339	chr2L	C;C	7806770	7806776	FBtr0343423	FBgn0031952	cdc14
31952	79492	1	1	773	7	1	0.0438653	chr2L	C;C	7806788	7806794	FBtr0079492	FBgn0031952	cdc14
31952	79492	1	1	791	7	0.651555	0.00154339	chr2L	C;C	7806770	7806776	FBtr0079492	FBgn0031952	cdc14
31952	301330	1	1	773	7	1	0.0438653	chr2L	C;C	7806788	7806794	FBtr0301330	FBgn0031952	cdc14
31952	301330	1	1	791	7	0.651555	0.00154339	chr2L	C;C	7806770	7806776	FBtr0301330	FBgn0031952	cdc14
31952	301331	1	1	773	7	1	0.0438653	chr2L	C;C	7806788	7806794	FBtr0301331	FBgn0031952	cdc14
31952	301331	1	1	791	7	0.651555	0.00154339	chr2L	C;C	7806770	7806776	FBtr0301331	FBgn0031952	cdc14
31952	343424	1	1	773	7	1	0.0438653	chr2L	C;C	7806788	7806794	FBtr0343424	FBgn0031952	cdc14
31952	343424	1	1	791	7	0.651555	0.00154339	chr2L	C;C	7806770	7806776	FBtr0343424	FBgn0031952	cdc14
31952	343424	1	1	3218	7	1	0.0388124	chr2L	3;3	7804005	7804011	FBtr0343424	FBgn0031952	cdc14
38894	84113	1	1	449	7	1	0.0257383	chr3R	C;C	21665743	21665749	FBtr0084113	FBgn0038894	CG15497
30884	344233	1	1	128	7	0.651555	0.0392226	chrX	5;5	17911590	17911596	FBtr0344233	FBgn0030884	CG6847
30884	344233	1	1	724	7	0.534039	0.0248845	chrX	5;C	17918914	17918920	FBtr0344233	FBgn0030884	CG6847
30884	344233	1	1	2561	7	0.534039	0.058206	chrX	C;C	17922543	17922549	FBtr0344233	FBgn0030884	CG6847
30884	74505	1	1	128	7	0.651555	0.0392226	chrX	5;5	17911590	17911596	FBtr0074505	FBgn0030884	CG6847
30884	74505	1	1	659	7	0.534039	0.0248845	chrX	5;C	17918914	17918920	FBtr0074505	FBgn0030884	CG6847
30884	74505	1	1	2496	7	0.534039	0.058206	chrX	C;C	17922543	17922549	FBtr0074505	FBgn0030884	CG6847
50295	332465	1	1	1346	7	0.534039	0.000881259	chr2R	C;C	20875529	20875535	FBtr0332465	FBgn0050295	Ipk1
50295	71515	1	1	1346	7	0.534039	0.000881259	chr2R	C;C	20875529	20875535	FBtr0071515	FBgn0050295	Ipk1
50295	342794	1	1	535	7	0.534039	0.000881259	chr2R	C;C	20875529	20875535	FBtr0342794	FBgn0050295	Ipk1
50295	113368	1	1	1346	7	0.534039	0.000881259	chr2R	C;C	20875529	20875535	FBtr0113368	FBgn0050295	Ipk1
30631	74011	1	1	2022	7	1	0.0029625	chrX	C;C	15347731	15347737	FBtr0074011	FBgn0030631	CG6227
30631	74011	1	1	2586	7	0.651555	0.00345707	chrX	C;C	15348295	15348301	FBtr0074011	FBgn0030631	CG6227
50379	305125	1	1	349	7	0.651555	0.135075	chr2R	C;C	7941332	7941338	FBtr0305125	FBgn0050379	CG30379
261574	332722	1	1	349	7	0.651555	0.137804	chr3L	C;C	20009079	20009085	FBtr0332722	FBgn0261574	kug
261574	332722	1	1	4900	7	0.651555	0.0310021	chr3L	C;C	20013989	20013995	FBtr0332722	FBgn0261574	kug
261574	332722	1	1	11733	7	1	0.00168352	chr3L	C;C	20021356	20021362	FBtr0332722	FBgn0261574	kug
261574	332721	1	1	349	7	0.651555	0.137804	chr3L	C;C	20009079	20009085	FBtr0332721	FBgn0261574	kug
261574	332721	1	1	4900	7	0.651555	0.0310021	chr3L	C;C	20013989	20013995	FBtr0332721	FBgn0261574	kug
261574	332721	1	1	11733	7	1	0.00168352	chr3L	C;C	20021356	20021362	FBtr0332721	FBgn0261574	kug
261574	346077	1	1	468	7	0.651555	0.137804	chr3L	C;C	20009079	20009085	FBtr0346077	FBgn0261574	kug
261574	346077	1	1	5019	7	0.651555	0.0310021	chr3L	C;C	20013989	20013995	FBtr0346077	FBgn0261574	kug
261574	346077	1	1	11852	7	1	0.00168352	chr3L	C;C	20021356	20021362	FBtr0346077	FBgn0261574	kug
24244	344768	1	1	1496	7	0.534039	0.00115523	chr2L	3;3	3547779	3547785	FBtr0344768	FBgn0024244	drm
24244	344768	1	1	1521	7	0.534039	0.000264985	chr2L	3;3	3547804	3547810	FBtr0344768	FBgn0024244	drm
24244	77531	1	1	2027	7	0.534039	0.00115523	chr2L	3;3	3547779	3547785	FBtr0077531	FBgn0024244	drm
24244	77531	1	1	2052	7	0.534039	0.000264985	chr2L	3;3	3547804	3547810	FBtr0077531	FBgn0024244	drm
24244	77530	1	1	1927	7	0.534039	0.00115523	chr2L	3;3	3547779	3547785	FBtr0077530	FBgn0024244	drm
24244	77530	1	1	1952	7	0.534039	0.000264985	chr2L	3;3	3547804	3547810	FBtr0077530	FBgn0024244	drm
51660	336831	1	1	4733	7	0.534039	0.0418443	chr2L	3;3	4876398	4876404	FBtr0336831	FBgn0051660	smog
51660	336831	1	1	4737	7	1	0.0414155	chr2L	3;3	4876402	4876408	FBtr0336831	FBgn0051660	smog
24510	72790	1	1	2976	7	0.651555	0.0330481	chr3L	C;C	1790648	1790654	FBtr0072790	FBgn0024510	dlt
24510	72790	1	1	3785	7	1	0.0136176	chr3L	C;C	1789839	1789845	FBtr0072790	FBgn0024510	dlt
284225	452124	1	1	2353	7	0.651555	0.0048555	chr2L	3;3	16246245	16246251	FBtr0452124	FBgn0284225	CG46309
34315	86771	1	1	647	7	0.651555	0.028374	chr2R	C;C	18183382	18183388	FBtr0086771	FBgn0034315	CG5721
85432	100246	1	1	3675	7	0.651555	0.0333623	chr4	3;3	101300	101306	FBtr0100246	FBgn0085432	pan
85432	309803	1	1	6536	7	1	0.0514088	chr4	3;3	112335	112341	FBtr0309803	FBgn0085432	pan
1253	76606	1	1	698	7	1	0.0176033	chr3L	C;C	8379930	8379936	FBtr0076606	FBgn0001253	ImpE1
1253	76606	1	1	2473	7	0.651555	0.0437902	chr3L	C;C	8387448	8387454	FBtr0076606	FBgn0001253	ImpE1
1253	76607	1	1	698	7	1	0.0176063	chr3L	C;C	8379930	8379936	FBtr0076607	FBgn0001253	ImpE1
1253	333057	1	1	754	7	1	0.0176033	chr3L	C;C	8379930	8379936	FBtr0333057	FBgn0001253	ImpE1
1253	333057	1	1	2529	7	0.651555	0.0437902	chr3L	C;C	8387448	8387454	FBtr0333057	FBgn0001253	ImpE1
263705	310333	1	1	7058	7	1	0.00180701	chrX	C;C	10948037	10948043	FBtr0310333	FBgn0263705	Myo10A
263705	346278	1	1	7155	7	1	0.00180701	chrX	C;C	10948037	10948043	FBtr0346278	FBgn0263705	Myo10A
263705	310334	1	1	7331	7	1	0.00180701	chrX	C;C	10948037	10948043	FBtr0310334	FBgn0263705	Myo10A
260857	74989	1	1	65	7	0.651555	0.0513211	chr3L	5;5	19261459	19261465	FBtr0074989	FBgn0260857	Bet1
260857	74990	1	1	65	7	0.651555	0.0513211	chr3L	5;5	19261459	19261465	FBtr0074990	FBgn0260857	Bet1
10414	343316	1	1	1608	7	1	0.056292	chr2R	C;C	24407500	24407506	FBtr0343316	FBgn0010414	SerT
10414	72362	1	1	1066	7	1	0.056292	chr2R	C;C	24407500	24407506	FBtr0072362	FBgn0010414	SerT
26620	302613	1	1	938	7	0.534039	0.00793877	chr3R	C;C	4735308	4735314	FBtr0302613	FBgn0026620	tacc
26620	306654	1	1	2152	7	1	0.00134087	chr3R	C;C	4742371	4742377	FBtr0306654	FBgn0026620	tacc
26620	306654	1	1	3572	7	0.534039	0.00793877	chr3R	C;C	4735308	4735314	FBtr0306654	FBgn0026620	tacc
26620	332446	1	1	2466	7	1	0.00134087	chr3R	C;C	4742371	4742377	FBtr0332446	FBgn0026620	tacc
26620	332446	1	1	3886	7	0.534039	0.00793877	chr3R	C;C	4735308	4735314	FBtr0332446	FBgn0026620	tacc
26620	302616	1	1	2625	7	1	0.00134087	chr3R	C;C	4742371	4742377	FBtr0302616	FBgn0026620	tacc
26620	302616	1	1	4045	7	0.534039	0.00793877	chr3R	C;C	4735308	4735314	FBtr0302616	FBgn0026620	tacc
26620	302615	1	1	2273	7	1	0.00134087	chr3R	C;C	4742371	4742377	FBtr0302615	FBgn0026620	tacc
26620	302615	1	1	3651	7	0.534039	0.00793877	chr3R	C;C	4735308	4735314	FBtr0302615	FBgn0026620	tacc
26620	89949	1	1	896	7	0.534039	0.00793877	chr3R	C;C	4735308	4735314	FBtr0089949	FBgn0026620	tacc
26620	89951	1	1	889	7	0.534039	0.00793877	chr3R	C;C	4735308	4735314	FBtr0089951	FBgn0026620	tacc
26620	89953	1	1	2625	7	1	0.00134087	chr3R	C;C	4742371	4742377	FBtr0089953	FBgn0026620	tacc
26620	89953	1	1	4003	7	0.534039	0.00793877	chr3R	C;C	4735308	4735314	FBtr0089953	FBgn0026620	tacc
26620	302614	1	1	2273	7	1	0.00134087	chr3R	C;C	4742371	4742377	FBtr0302614	FBgn0026620	tacc
26620	302614	1	1	3693	7	0.534039	0.00793877	chr3R	C;C	4735308	4735314	FBtr0302614	FBgn0026620	tacc
26620	332445	1	1	2625	7	1	0.00134087	chr3R	C;C	4742371	4742377	FBtr0332445	FBgn0026620	tacc
26620	332445	1	1	4045	7	0.534039	0.00793877	chr3R	C;C	4735308	4735314	FBtr0332445	FBgn0026620	tacc
26620	89950	1	1	931	7	0.534039	0.00793877	chr3R	C;C	4735308	4735314	FBtr0089950	FBgn0026620	tacc
26620	89952	1	1	2580	7	1	0.00134087	chr3R	C;C	4742371	4742377	FBtr0089952	FBgn0026620	tacc
26620	89952	1	1	3958	7	0.534039	0.00793877	chr3R	C;C	4735308	4735314	FBtr0089952	FBgn0026620	tacc
26620	89955	1	1	2273	7	1	0.00134087	chr3R	C;C	4742371	4742377	FBtr0089955	FBgn0026620	tacc
26620	89955	1	1	3690	7	0.534039	0.00793877	chr3R	C;C	4735308	4735314	FBtr0089955	FBgn0026620	tacc
39241	84710	1	1	348	7	1	0.00138707	chr3R	C;C	24879372	24879378	FBtr0084710	FBgn0039241	CG11089
39241	303476	1	1	271	7	1	0.00138707	chr3R	C;C	24879372	24879378	FBtr0303476	FBgn0039241	CG11089
260799	111114	1	1	1792	7	1	0.0662447	chr2R	C;C	4608600	4608606	FBtr0111114	FBgn0260799	p120ctn
35798	301221	1	1	185	7	0.534039	0.00395541	chr3L	C;C	7563111	7563117	FBtr0301221	FBgn0035798	frac
35798	301221	1	1	3834	7	0.651555	0.000972265	chr3L	C;C	7567992	7567998	FBtr0301221	FBgn0035798	frac
35798	301221	1	1	4018	7	1	0.0312651	chr3L	C;C	7568176	7568182	FBtr0301221	FBgn0035798	frac
35798	331839	1	1	185	7	0.534039	0.00395541	chr3L	C;C	7563111	7563117	FBtr0331839	FBgn0035798	frac
35798	331839	1	1	3261	7	0.651555	0.000972265	chr3L	C;C	7567992	7567998	FBtr0331839	FBgn0035798	frac
35798	331839	1	1	3445	7	1	0.0312651	chr3L	C;C	7568176	7568182	FBtr0331839	FBgn0035798	frac
35798	331840	1	1	132	7	0.534039	0.00395541	chr3L	C;C	7563111	7563117	FBtr0331840	FBgn0035798	frac
35798	331840	1	1	3208	7	0.651555	0.000972265	chr3L	C;C	7567992	7567998	FBtr0331840	FBgn0035798	frac
35798	331840	1	1	3392	7	1	0.0312651	chr3L	C;C	7568176	7568182	FBtr0331840	FBgn0035798	frac
35798	290277	1	1	132	7	0.534039	0.00395541	chr3L	C;C	7563111	7563117	FBtr0290277	FBgn0035798	frac
35798	290277	1	1	3781	7	0.651555	0.000972265	chr3L	C;C	7567992	7567998	FBtr0290277	FBgn0035798	frac
35798	290277	1	1	3965	7	1	0.0312651	chr3L	C;C	7568176	7568182	FBtr0290277	FBgn0035798	frac
35798	301222	1	1	501	7	0.534039	0.00395541	chr3L	C;C	7563111	7563117	FBtr0301222	FBgn0035798	frac
35798	301222	1	1	4150	7	0.651555	0.000972265	chr3L	C;C	7567992	7567998	FBtr0301222	FBgn0035798	frac
35798	301222	1	1	4334	7	1	0.0312651	chr3L	C;C	7568176	7568182	FBtr0301222	FBgn0035798	frac
33497	339429	1	1	5188	7	0.534039	0.0284514	chr2R	3;3	10206725	10206731	FBtr0339429	FBgn0033497	CG12912
1078	75086	1	1	1192	7	0.651555	0.0432872	chr3L	5;5	18800111	18800117	FBtr0075086	FBgn0001078	ftz-f1
1078	75086	1	1	4128	7	0.651555	0.282695	chr3L	C;C	18753209	18753215	FBtr0075086	FBgn0001078	ftz-f1
1078	347045	1	1	231	7	1	0.0778989	chr3L	5;5	18765507	18765513	FBtr0347045	FBgn0001078	ftz-f1
1078	347045	1	1	1428	7	0.534039	0.0384773	chr3L	C;C	18764310	18764316	FBtr0347045	FBgn0001078	ftz-f1
1078	347045	1	1	3639	7	0.651555	0.282695	chr3L	C;C	18753209	18753215	FBtr0347045	FBgn0001078	ftz-f1
1078	304627	1	1	231	7	1	0.0778989	chr3L	5;5	18765507	18765513	FBtr0304627	FBgn0001078	ftz-f1
1078	304627	1	1	1428	7	0.534039	0.0384773	chr3L	C;C	18764310	18764316	FBtr0304627	FBgn0001078	ftz-f1
1078	304627	1	1	3489	7	0.651555	0.282695	chr3L	C;C	18753209	18753215	FBtr0304627	FBgn0001078	ftz-f1
1078	75087	1	1	640	7	0.534039	0.0384773	chr3L	C;C	18764310	18764316	FBtr0075087	FBgn0001078	ftz-f1
1078	75087	1	1	2701	7	0.651555	0.282695	chr3L	C;C	18753209	18753215	FBtr0075087	FBgn0001078	ftz-f1
53970	100013	1	1	283	7	0.534039	0.0791647	chr3R	C;C	26355814	26355820	FBtr0100013	FBgn0053970	CG33970
53970	100012	1	1	1598	7	0.534039	0.0791647	chr3R	C;C	26355814	26355820	FBtr0100012	FBgn0053970	CG33970
53970	346107	1	1	1598	7	0.534039	0.0791647	chr3R	C;C	26355814	26355820	FBtr0346107	FBgn0053970	CG33970
29834	305345	1	1	2944	7	0.534039	0.0279353	chrX	C;C	6044916	6044922	FBtr0305345	FBgn0029834	CG5937
29834	305345	1	1	4558	7	0.651555	0.023649	chrX	C;C	6046660	6046666	FBtr0305345	FBgn0029834	CG5937
29834	305346	1	1	2962	7	0.534039	0.0279353	chrX	C;C	6044916	6044922	FBtr0305346	FBgn0029834	CG5937
29834	305346	1	1	4576	7	0.651555	0.023649	chrX	C;C	6046660	6046666	FBtr0305346	FBgn0029834	CG5937
32614	332333	1	1	443	7	0.651555	0.0174429	chr2L	5;5	16847646	16847652	FBtr0332333	FBgn0032614	CG13284
33504	336694	1	1	1045	7	0.534039	0.00346472	chr2R	C;C	10282667	10282673	FBtr0336694	FBgn0033504	CAP
33504	336694	1	1	2487	7	0.651555	0.0427645	chr2R	C;C	10284109	10284115	FBtr0336694	FBgn0033504	CAP
33504	336696	1	1	3931	7	0.534039	0.00346472	chr2R	C;C	10282667	10282673	FBtr0336696	FBgn0033504	CAP
33504	336696	1	1	5373	7	0.651555	0.0427645	chr2R	C;C	10284109	10284115	FBtr0336696	FBgn0033504	CAP
33504	88341	1	1	3931	7	0.534039	0.00346472	chr2R	C;C	10282667	10282673	FBtr0088341	FBgn0033504	CAP
33504	88341	1	1	5373	7	0.651555	0.0427645	chr2R	C;C	10284109	10284115	FBtr0088341	FBgn0033504	CAP
33504	88344	1	1	4306	7	0.651555	0.0201462	chr2R	C;C	10300112	10300118	FBtr0088344	FBgn0033504	CAP
33504	299830	1	1	3931	7	0.534039	0.00346472	chr2R	C;C	10282667	10282673	FBtr0299830	FBgn0033504	CAP
33504	299830	1	1	5373	7	0.651555	0.0427645	chr2R	C;C	10284109	10284115	FBtr0299830	FBgn0033504	CAP
33504	299830	1	1	6336	7	1	0.00183333	chr2R	3;3	10285680	10285686	FBtr0299830	FBgn0033504	CAP
33504	301131	1	1	3931	7	0.534039	0.00346472	chr2R	C;C	10282667	10282673	FBtr0301131	FBgn0033504	CAP
33504	301131	1	1	5373	7	0.651555	0.0427645	chr2R	C;C	10284109	10284115	FBtr0301131	FBgn0033504	CAP
33504	306691	1	1	3931	7	0.534039	0.00346472	chr2R	C;C	10282667	10282673	FBtr0306691	FBgn0033504	CAP
33504	306691	1	1	5373	7	0.651555	0.0427645	chr2R	C;C	10284109	10284115	FBtr0306691	FBgn0033504	CAP
33504	299826	1	1	3931	7	0.534039	0.00346472	chr2R	C;C	10282667	10282673	FBtr0299826	FBgn0033504	CAP
33504	299826	1	1	5373	7	0.651555	0.0427645	chr2R	C;C	10284109	10284115	FBtr0299826	FBgn0033504	CAP
33504	336695	1	1	3931	7	0.534039	0.00346472	chr2R	C;C	10282667	10282673	FBtr0336695	FBgn0033504	CAP
33504	336695	1	1	5373	7	0.651555	0.0427645	chr2R	C;C	10284109	10284115	FBtr0336695	FBgn0033504	CAP
33504	301965	1	1	4306	7	0.651555	0.0201462	chr2R	C;C	10300112	10300118	FBtr0301965	FBgn0033504	CAP
35954	76521	1	1	659	7	0.534039	0.0491265	chr3L	C;C	9006171	9006177	FBtr0076521	FBgn0035954	Doc3
29752	340478	1	1	263	7	0.534039	0.432148	chrX	C;C	5311486	5311492	FBtr0340478	FBgn0029752	TrxT
29752	340478	1	1	354	7	0.534039	0.038259	chrX	C;C	5311395	5311401	FBtr0340478	FBgn0029752	TrxT
29752	70755	1	1	263	7	0.534039	0.432148	chrX	C;C	5311486	5311492	FBtr0070755	FBgn0029752	TrxT
29752	70755	1	1	354	7	0.534039	0.038259	chrX	C;C	5311395	5311401	FBtr0070755	FBgn0029752	TrxT
50197	87494	1	1	163	7	0.651555	0.03154	chr2R	C;C	14514328	14514334	FBtr0087494	FBgn0050197	CG30197
29963	71150	1	1	244	7	0.534039	0.0101914	chrX	C;C	7853994	7854000	FBtr0071150	FBgn0029963	CG10920
29963	71150	1	1	1170	7	0.534039	0.00352062	chrX	C;C	7853068	7853074	FBtr0071150	FBgn0029963	CG10920
39915	89972	1	1	2563	7	0.651555	0.00448137	chr4	3;3	635019	635025	FBtr0089972	FBgn0039915	Gat
39915	89971	1	1	2521	7	0.651555	0.00448137	chr4	3;3	635019	635025	FBtr0089971	FBgn0039915	Gat
31549	301590	1	1	1108	7	0.534039	0.0299497	chr2L	C;C	3528875	3528881	FBtr0301590	FBgn0031549	Spindly
31549	301590	1	1	2378	7	0.651555	0.0518345	chr2L	3;3	3527545	3527551	FBtr0301590	FBgn0031549	Spindly
53971	100014	1	1	121	7	1	0.00343373	chr3L	C;C	1531132	1531138	FBtr0100014	FBgn0053971	Ir62a
53971	100014	1	1	1570	7	0.651555	0.0535896	chr3L	C;C	1529683	1529689	FBtr0100014	FBgn0053971	Ir62a
38608	83586	1	1	1399	7	0.651555	0.0905454	chr3R	3;3	18364333	18364339	FBtr0083586	FBgn0038608	WRNexo
38608	302307	1	1	1402	7	0.651555	0.0905454	chr3R	3;3	18364333	18364339	FBtr0302307	FBgn0038608	WRNexo
38608	339976	1	1	1399	7	0.651555	0.0905454	chr3R	3;3	18364333	18364339	FBtr0339976	FBgn0038608	WRNexo
4198	331733	1	1	4885	7	0.534039	0.00331315	chrX	C;C	7672710	7672716	FBtr0331733	FBgn0004198	ct
4198	331733	1	1	4919	7	0.534039	0.0639993	chrX	C;C	7672744	7672750	FBtr0331733	FBgn0004198	ct
4198	331733	1	1	9368	7	0.651555	0.027689	chrX	3;3	7677193	7677199	FBtr0331733	FBgn0004198	ct
4198	71068	1	1	4888	7	0.534039	0.00331315	chrX	C;C	7672710	7672716	FBtr0071068	FBgn0004198	ct
4198	71068	1	1	4922	7	0.534039	0.0639993	chrX	C;C	7672744	7672750	FBtr0071068	FBgn0004198	ct
4198	71068	1	1	9371	7	0.651555	0.027689	chrX	3;3	7677193	7677199	FBtr0071068	FBgn0004198	ct
4198	114613	1	1	5512	7	0.534039	0.00331315	chrX	C;C	7672710	7672716	FBtr0114613	FBgn0004198	ct
4198	114613	1	1	5546	7	0.534039	0.0639993	chrX	C;C	7672744	7672750	FBtr0114613	FBgn0004198	ct
4198	114613	1	1	9995	7	0.651555	0.027689	chrX	3;3	7677193	7677199	FBtr0114613	FBgn0004198	ct
4198	305134	1	1	5182	7	0.534039	0.00331315	chrX	C;C	7672710	7672716	FBtr0305134	FBgn0004198	ct
4198	305134	1	1	5216	7	0.534039	0.0639993	chrX	C;C	7672744	7672750	FBtr0305134	FBgn0004198	ct
4198	305134	1	1	9665	7	0.651555	0.027689	chrX	3;3	7677193	7677199	FBtr0305134	FBgn0004198	ct
546	302439	1	1	2240	7	0.534039	0.068771	chr2R	C;C	6094567	6094573	FBtr0302439	FBgn0000546	EcR
546	302439	1	1	4138	7	1	0.0932497	chr2R	3;3	6092143	6092149	FBtr0302439	FBgn0000546	EcR
546	302439	1	1	5626	7	0.534039	0.143883	chr2R	3;3	6090655	6090661	FBtr0302439	FBgn0000546	EcR
546	86010	1	1	1604	7	0.534039	0.068771	chr2R	C;C	6094567	6094573	FBtr0086010	FBgn0000546	EcR
546	86010	1	1	3502	7	1	0.0932497	chr2R	3;3	6092143	6092149	FBtr0086010	FBgn0000546	EcR
546	86010	1	1	4990	7	0.534039	0.143883	chr2R	3;3	6090655	6090661	FBtr0086010	FBgn0000546	EcR
546	86012	1	1	1355	7	0.534039	0.068771	chr2R	C;C	6094567	6094573	FBtr0086012	FBgn0000546	EcR
546	86012	1	1	3253	7	1	0.0932497	chr2R	3;3	6092143	6092149	FBtr0086012	FBgn0000546	EcR
546	86012	1	1	4741	7	0.534039	0.143883	chr2R	3;3	6090655	6090661	FBtr0086012	FBgn0000546	EcR
546	86008	1	1	1479	7	0.534039	0.068771	chr2R	C;C	6094567	6094573	FBtr0086008	FBgn0000546	EcR
546	86008	1	1	3377	7	1	0.0932497	chr2R	3;3	6092143	6092149	FBtr0086008	FBgn0000546	EcR
546	86008	1	1	4865	7	0.534039	0.143883	chr2R	3;3	6090655	6090661	FBtr0086008	FBgn0000546	EcR
546	86009	1	1	1558	7	0.534039	0.068771	chr2R	C;C	6094567	6094573	FBtr0086009	FBgn0000546	EcR
546	86009	1	1	3456	7	1	0.0932497	chr2R	3;3	6092143	6092149	FBtr0086009	FBgn0000546	EcR
546	86011	1	1	2321	7	0.534039	0.068771	chr2R	C;C	6094567	6094573	FBtr0086011	FBgn0000546	EcR
36923	303781	1	1	609	7	0.534039	0.240013	chr3L	C;C	19982428	19982434	FBtr0303781	FBgn0036923	CG17732
36923	303781	1	1	891	7	0.651555	0.00163416	chr3L	C;C	19982710	19982716	FBtr0303781	FBgn0036923	CG17732
36923	303781	1	1	1600	7	0.534039	0.0115513	chr3L	C;C	19983419	19983425	FBtr0303781	FBgn0036923	CG17732
10548	88993	1	1	91	7	1	0.0632397	chr2R	5;5	7474033	7474039	FBtr0088993	FBgn0010548	Aldh-III
10548	300478	1	1	91	7	1	0.113847	chr2R	5;5	7474033	7474039	FBtr0300478	FBgn0010548	Aldh-III
10548	310676	1	1	91	7	1	0.0632397	chr2R	5;5	7474033	7474039	FBtr0310676	FBgn0010548	Aldh-III
10548	300477	1	1	91	7	1	0.0632397	chr2R	5;5	7474033	7474039	FBtr0300477	FBgn0010548	Aldh-III
51742	81025	1	1	877	7	0.651555	0.0177561	chr2L	C;C	17991295	17991301	FBtr0081025	FBgn0051742	Prosbeta5R2
51742	340183	1	1	877	7	0.651555	0.0177561	chr2L	C;C	17991295	17991301	FBtr0340183	FBgn0051742	Prosbeta5R2
52113	273390	1	1	8375	7	0.534039	0.00133021	chr3L	C;C	12764628	12764634	FBtr0273390	FBgn0052113	CG32113
52113	273390	1	1	10127	7	1	0.243363	chr3L	C;C	12766559	12766565	FBtr0273390	FBgn0052113	CG32113
52113	273390	1	1	10181	7	0.651555	0.0234142	chr3L	C;C	12766613	12766619	FBtr0273390	FBgn0052113	CG32113
52113	273390	1	1	10733	7	0.651555	0.0937646	chr3L	C;C	12767280	12767286	FBtr0273390	FBgn0052113	CG32113
38870	84050	1	1	1267	7	0.651555	0.0503685	chr3R	C;C	21220457	21220463	FBtr0084050	FBgn0038870	Oga
39038	84343	1	1	1006	7	1	0.0433373	chr3R	C;C	23014704	23014710	FBtr0084343	FBgn0039038	CG6688
27505	80301	1	1	3061	7	1	0.00102669	chr2L	C;C	12059824	12059830	FBtr0080301	FBgn0027505	Rab3-GAP
27505	80302	1	1	3061	7	1	0.00102669	chr2L	C;C	12059824	12059830	FBtr0080302	FBgn0027505	Rab3-GAP
27360	71676	1	1	141	7	0.534039	0.0080915	chr2R	5;5	21690921	21690927	FBtr0071676	FBgn0027360	Tim10
27360	71677	1	1	212	7	0.534039	0.0080915	chr2R	5;5	21690921	21690927	FBtr0071677	FBgn0027360	Tim10
30400	331718	1	1	4980	7	0.651555	0.0995141	chrX	3;3	12569900	12569906	FBtr0331718	FBgn0030400	CG11138
30400	73662	1	1	5070	7	0.651555	0.0995141	chrX	3;3	12569900	12569906	FBtr0073662	FBgn0030400	CG11138
30230	71502	1	1	427	7	0.534039	0.0310558	chrX	C;C	10753515	10753521	FBtr0071502	FBgn0030230	Rph
30230	71502	1	1	2367	7	1	0.0886578	chrX	3;3	10749529	10749535	FBtr0071502	FBgn0030230	Rph
30230	332296	1	1	427	7	0.534039	0.0310558	chrX	5;5	10753515	10753521	FBtr0332296	FBgn0030230	Rph
30230	332296	1	1	2714	7	1	0.0886578	chrX	3;3	10749529	10749535	FBtr0332296	FBgn0030230	Rph
30230	332295	1	1	1083	7	0.534039	0.0310558	chrX	5;5	10753515	10753521	FBtr0332295	FBgn0030230	Rph
30230	332295	1	1	3015	7	1	0.0886578	chrX	3;3	10749529	10749535	FBtr0332295	FBgn0030230	Rph
30230	301558	1	1	427	7	0.534039	0.0310558	chrX	5;5	10753515	10753521	FBtr0301558	FBgn0030230	Rph
30230	301558	1	1	2882	7	1	0.0886578	chrX	3;3	10749529	10749535	FBtr0301558	FBgn0030230	Rph
32648	303652	1	1	863	7	0.651555	0.50795	chr2L	C;C	17528077	17528083	FBtr0303652	FBgn0032648	CG15144
32648	303652	1	1	1957	7	0.651555	0.0061819	chr2L	C;C	17526983	17526989	FBtr0303652	FBgn0032648	CG15144
2926	76984	1	1	3509	7	1	0.114328	chr3L	C;C	6599251	6599257	FBtr0076984	FBgn0002926	ndl
36770	75153	1	1	383	7	1	0.0943304	chr3L	5;5	17907423	17907429	FBtr0075153	FBgn0036770	Prestin
261258	333386	1	1	2419	7	0.651555	0.0249663	chr3L	C;C	21422563	21422569	FBtr0333386	FBgn0261258	rgn
261258	78346	1	1	2468	7	0.651555	0.0249663	chr3L	C;C	21422563	21422569	FBtr0078346	FBgn0261258	rgn
261258	309230	1	1	2443	7	0.651555	0.0249663	chr3L	C;C	21422563	21422569	FBtr0309230	FBgn0261258	rgn
261258	333385	1	1	2492	7	0.651555	0.0249663	chr3L	C;C	21422563	21422569	FBtr0333385	FBgn0261258	rgn
45477	73196	1	1	604	7	1	0.0789897	chr3L	C;C	4030976	4030982	FBtr0073196	FBgn0045477	Gr64c
45477	309790	1	1	1920	7	1	0.0789897	chr3L	C;C	4030976	4030982	FBtr0309790	FBgn0045477	Gr64c
35993	76504	1	1	1295	7	0.534039	0.01725	chr3L	C;C	9440809	9440815	FBtr0076504	FBgn0035993	Nf-YA
39066	84374	1	1	708	7	0.534039	0.00183944	chr3R	C;C	23252562	23252568	FBtr0084374	FBgn0039066	EloA
39066	84374	1	1	2472	7	1	0.00407357	chr3R	3;3	23254675	23254681	FBtr0084374	FBgn0039066	EloA
39066	84375	1	1	536	7	0.534039	0.00183944	chr3R	C;C	23252562	23252568	FBtr0084375	FBgn0039066	EloA
39066	84375	1	1	2300	7	1	0.00407357	chr3R	3;3	23254675	23254681	FBtr0084375	FBgn0039066	EloA
38695	346143	1	1	116	7	0.651555	0.0087057	chr3R	5;5	19256893	19256899	FBtr0346143	FBgn0038695	CG14280
38695	346143	1	1	1115	7	0.534039	0.116283	chr3R	C;C	19257892	19257898	FBtr0346143	FBgn0038695	CG14280
38695	83738	1	1	626	7	0.534039	0.116283	chr3R	C;C	19257892	19257898	FBtr0083738	FBgn0038695	CG14280
11763	87741	1	1	2261	7	0.534039	0.209895	chr2R	3;3	13228016	13228022	FBtr0087741	FBgn0011763	Dp
259243	302641	1	1	20	7	1	0.00154185	chr3L	5;5	20816138	20816144	FBtr0302641	FBgn0259243	Pka-R1
259243	300528	1	1	20	7	1	0.00154185	chr3L	5;5	20816138	20816144	FBtr0300528	FBgn0259243	Pka-R1
259243	300530	1	1	20	7	1	0.0676311	chr3L	5;5	20816138	20816144	FBtr0300530	FBgn0259243	Pka-R1
259243	302643	1	1	20	7	1	0.0133545	chr3L	5;5	20816138	20816144	FBtr0302643	FBgn0259243	Pka-R1
259243	300535	1	1	20	7	1	0.140228	chr3L	5;5	20816138	20816144	FBtr0300535	FBgn0259243	Pka-R1
259243	299891	1	1	20	7	1	0.00154185	chr3L	5;5	20816138	20816144	FBtr0299891	FBgn0259243	Pka-R1
259243	302642	1	1	20	7	1	0.0676311	chr3L	5;5	20816138	20816144	FBtr0302642	FBgn0259243	Pka-R1
259243	299892	1	1	20	7	1	0.00154185	chr3L	5;5	20816138	20816144	FBtr0299892	FBgn0259243	Pka-R1
259243	300534	1	1	20	7	1	0.0133545	chr3L	5;5	20816138	20816144	FBtr0300534	FBgn0259243	Pka-R1
20626	84801	1	1	795	7	0.534039	0.0376549	chr3R	C;C	24937421	24937427	FBtr0084801	FBgn0020626	Osbp
32168	343747	1	1	1286	7	0.534039	0.0154903	chr2L	C;C	9952827	9952833	FBtr0343747	FBgn0032168	CG13126
32168	343747	1	1	1654	7	0.534039	0.025548	chr2L	3;3	9952400	9952406	FBtr0343747	FBgn0032168	CG13126
32168	79892	1	1	1286	7	0.534039	0.0154903	chr2L	C;C	9952827	9952833	FBtr0079892	FBgn0032168	CG13126
38964	84230	1	1	137	7	0.534039	0.0407053	chr3R	C;C	22420762	22420768	FBtr0084230	FBgn0038964	Nop56
85447	330122	1	1	4372	7	0.651555	0.0191839	chr3L	C;C	5722409	5722415	FBtr0330122	FBgn0085447	sif
85447	330122	1	1	5840	7	1	0.0121545	chr3L	C;C	5738494	5738500	FBtr0330122	FBgn0085447	sif
85447	330123	1	1	4974	7	0.651555	0.0191839	chr3L	C;C	5722409	5722415	FBtr0330123	FBgn0085447	sif
85447	330123	1	1	6442	7	1	0.0121545	chr3L	C;C	5738494	5738500	FBtr0330123	FBgn0085447	sif
85447	330123	1	1	7561	7	1	0.00201942	chr3L	C;C	5740253	5740259	FBtr0330123	FBgn0085447	sif
85447	330123	1	1	13491	7	1	0.144795	chr3L	3;3	5746183	5746189	FBtr0330123	FBgn0085447	sif
85447	330125	1	1	4947	7	0.651555	0.0191839	chr3L	C;C	5722409	5722415	FBtr0330125	FBgn0085447	sif
85447	330125	1	1	6442	7	1	0.0121545	chr3L	C;C	5738494	5738500	FBtr0330125	FBgn0085447	sif
85447	112712	1	1	4917	7	0.651555	0.0191839	chr3L	C;C	5722409	5722415	FBtr0112712	FBgn0085447	sif
85447	112712	1	1	6385	7	1	0.0121545	chr3L	C;C	5738494	5738500	FBtr0112712	FBgn0085447	sif
85447	112712	1	1	7504	7	1	0.00201942	chr3L	C;C	5740253	5740259	FBtr0112712	FBgn0085447	sif
85447	112712	1	1	13434	7	1	0.144795	chr3L	3;3	5746183	5746189	FBtr0112712	FBgn0085447	sif
85447	330124	1	1	1845	7	0.651555	0.0191839	chr3L	C;C	5722409	5722415	FBtr0330124	FBgn0085447	sif
85447	330124	1	1	3340	7	1	0.0121545	chr3L	C;C	5738494	5738500	FBtr0330124	FBgn0085447	sif
85447	346962	1	1	4929	7	0.651555	0.0191839	chr3L	C;C	5722409	5722415	FBtr0346962	FBgn0085447	sif
85447	346962	1	1	6397	7	1	0.0121545	chr3L	C;C	5738494	5738500	FBtr0346962	FBgn0085447	sif
85447	346962	1	1	7516	7	1	0.00201942	chr3L	C;C	5740253	5740259	FBtr0346962	FBgn0085447	sif
85447	346962	1	1	13446	7	1	0.144795	chr3L	3;3	5746183	5746189	FBtr0346962	FBgn0085447	sif
85447	340654	1	1	4577	7	0.651555	0.0191839	chr3L	C;C	5722409	5722415	FBtr0340654	FBgn0085447	sif
85447	340654	1	1	6072	7	1	0.0121545	chr3L	C;C	5738494	5738500	FBtr0340654	FBgn0085447	sif
85447	340655	1	1	4893	7	0.651555	0.0191839	chr3L	C;C	5722409	5722415	FBtr0340655	FBgn0085447	sif
85447	340655	1	1	6388	7	1	0.0121545	chr3L	C;C	5738494	5738500	FBtr0340655	FBgn0085447	sif
85447	330126	1	1	2950	7	1	0.00703484	chr3L	C;C	5698015	5698021	FBtr0330126	FBgn0085447	sif
85447	330126	1	1	5157	7	0.651555	0.0191839	chr3L	C;C	5722409	5722415	FBtr0330126	FBgn0085447	sif
85447	330126	1	1	6652	7	1	0.0121545	chr3L	C;C	5738494	5738500	FBtr0330126	FBgn0085447	sif
85447	330126	1	1	7771	7	1	0.00201942	chr3L	C;C	5740253	5740259	FBtr0330126	FBgn0085447	sif
85447	330126	1	1	13701	7	1	0.144795	chr3L	3;3	5746183	5746189	FBtr0330126	FBgn0085447	sif
85447	112709	1	1	2950	7	1	0.00703484	chr3L	C;C	5698015	5698021	FBtr0112709	FBgn0085447	sif
85447	112709	1	1	5157	7	0.651555	0.0191839	chr3L	C;C	5722409	5722415	FBtr0112709	FBgn0085447	sif
85447	112709	1	1	6625	7	1	0.0121545	chr3L	C;C	5738494	5738500	FBtr0112709	FBgn0085447	sif
85447	112710	1	1	2950	7	1	0.00703484	chr3L	C;C	5698015	5698021	FBtr0112710	FBgn0085447	sif
85447	112710	1	1	5157	7	0.651555	0.0191839	chr3L	C;C	5722409	5722415	FBtr0112710	FBgn0085447	sif
85447	112710	1	1	6652	7	1	0.0121545	chr3L	C;C	5738494	5738500	FBtr0112710	FBgn0085447	sif
85447	340656	1	1	5929	7	0.651555	0.0191839	chr3L	C;C	5722409	5722415	FBtr0340656	FBgn0085447	sif
85447	340656	1	1	7424	7	1	0.0121545	chr3L	C;C	5738494	5738500	FBtr0340656	FBgn0085447	sif
85447	340656	1	1	8543	7	1	0.00201942	chr3L	C;C	5740253	5740259	FBtr0340656	FBgn0085447	sif
85447	340656	1	1	14473	7	1	0.144795	chr3L	3;3	5746183	5746189	FBtr0340656	FBgn0085447	sif
85447	112708	1	1	3927	7	0.651555	0.0191839	chr3L	C;C	5722409	5722415	FBtr0112708	FBgn0085447	sif
85447	112708	1	1	5395	7	1	0.0121545	chr3L	C;C	5738494	5738500	FBtr0112708	FBgn0085447	sif
86694	344538	1	1	3639	7	0.534039	0.0430245	chr3L	3;3	5790178	5790184	FBtr0344538	FBgn0086694	Bre1
46689	83996	1	1	1275	7	1	0.0844982	chr3R	3;3	20770869	20770875	FBtr0083996	FBgn0046689	Takl1
28863	344778	1	1	6317	7	0.651555	0.00956979	chr2L	3;3	15645989	15645995	FBtr0344778	FBgn0028863	CG4587
28863	344777	1	1	6317	7	0.651555	0.00956979	chr2L	3;3	15645989	15645995	FBtr0344777	FBgn0028863	CG4587
39385	84938	1	1	1018	7	0.534039	0.0220522	chr3R	C;C	25894513	25894519	FBtr0084938	FBgn0039385	CG5913
261046	330211	1	1	856	7	1	0.00182455	chr3R	C;C	17494089	17494095	FBtr0330211	FBgn0261046	Dscam3
261046	330212	1	1	856	7	1	0.00182455	chr3R	C;C	17494089	17494095	FBtr0330212	FBgn0261046	Dscam3
261046	113397	1	1	1261	7	1	0.00182455	chr3R	C;C	17494089	17494095	FBtr0113397	FBgn0261046	Dscam3
261046	113398	1	1	856	7	1	0.00182455	chr3R	C;C	17494089	17494095	FBtr0113398	FBgn0261046	Dscam3
33998	87402	1	1	3655	7	0.534039	0.0139279	chr2R	C;C	15207279	15207285	FBtr0087402	FBgn0033998	row
33998	329939	1	1	3655	7	0.534039	0.0139279	chr2R	C;C	15207279	15207285	FBtr0329939	FBgn0033998	row
25383	70257	1	1	431	7	0.534039	0.00366717	chrX	C;C	1473012	1473018	FBtr0070257	FBgn0025383	CG14780
3731	71654	1	1	2173	7	1	0.00572859	chr2R	C;C	21555890	21555896	FBtr0071654	FBgn0003731	Egfr
3731	71653	1	1	1747	7	1	0.00572859	chr2R	C;C	21555890	21555896	FBtr0071653	FBgn0003731	Egfr
51224	83691	1	1	184	7	0.651555	0.0137189	chr3R	5;5	18659119	18659125	FBtr0083691	FBgn0051224	CG31224
51224	83691	1	1	795	7	1	0.00186693	chr3R	C;C	18656934	18656940	FBtr0083691	FBgn0051224	CG31224
51224	344326	1	1	301	7	1	0.00186693	chr3R	C;C	18656934	18656940	FBtr0344326	FBgn0051224	CG31224
51224	344327	1	1	184	7	0.651555	0.0137189	chr3R	5;5	18659119	18659125	FBtr0344327	FBgn0051224	CG31224
51224	344327	1	1	1029	7	1	0.00186693	chr3R	C;C	18656934	18656940	FBtr0344327	FBgn0051224	CG31224
259720	344455	1	1	56	7	0.651555	0.0293936	chr3L	5;5	19263822	19263828	FBtr0344455	FBgn0259720	CG42374
35539	73292	1	1	968	7	1	0.0129799	chr3L	C;C	4401910	4401916	FBtr0073292	FBgn0035539	slow
35539	73292	1	1	1205	7	0.651555	0.00920735	chr3L	C;C	4402147	4402153	FBtr0073292	FBgn0035539	slow
35539	73291	1	1	1228	7	1	0.0129799	chr3L	C;C	4401910	4401916	FBtr0073291	FBgn0035539	slow
35539	73291	1	1	1465	7	0.651555	0.00920735	chr3L	C;C	4402147	4402153	FBtr0073291	FBgn0035539	slow
34718	71851	1	1	2905	7	0.651555	0.00150848	chr2R	3;3	22298370	22298376	FBtr0071851	FBgn0034718	wdp
34718	71852	1	1	2703	7	0.651555	0.00150848	chr2R	3;3	22298370	22298376	FBtr0071852	FBgn0034718	wdp
34718	71850	1	1	2875	7	0.651555	0.00150848	chr2R	3;3	22298370	22298376	FBtr0071850	FBgn0034718	wdp
34718	342984	1	1	2693	7	0.651555	0.00150848	chr2R	3;3	22298370	22298376	FBtr0342984	FBgn0034718	wdp
34718	71849	1	1	2924	7	0.651555	0.00150848	chr2R	3;3	22298370	22298376	FBtr0071849	FBgn0034718	wdp
38199	113232	1	1	835	7	1	0.0102283	chr3R	3;3	14092519	14092525	FBtr0113232	FBgn0038199	CCHa1
27598	85704	1	1	186	7	1	0.00219627	chr3R	5;5	30808803	30808809	FBtr0085704	FBgn0027598	cindr
27598	85704	1	1	3504	7	1	0.10099	chr3R	3;3	30826247	30826253	FBtr0085704	FBgn0027598	cindr
27598	310068	1	1	186	7	1	0.00219627	chr3R	5;5	30808803	30808809	FBtr0310068	FBgn0027598	cindr
27598	310068	1	1	3584	7	1	0.10099	chr3R	3;3	30826247	30826253	FBtr0310068	FBgn0027598	cindr
27598	85706	1	1	2003	7	1	0.10099	chr3R	3;3	30826247	30826253	FBtr0085706	FBgn0027598	cindr
27598	310072	1	1	1921	7	1	0.10099	chr3R	3;3	30826247	30826253	FBtr0310072	FBgn0027598	cindr
27598	85705	1	1	2495	7	1	0.10099	chr3R	3;3	30826247	30826253	FBtr0085705	FBgn0027598	cindr
27598	310424	1	1	186	7	1	0.00219627	chr3R	5;5	30808803	30808809	FBtr0310424	FBgn0027598	cindr
27598	310424	1	1	3681	7	1	0.10099	chr3R	3;3	30826247	30826253	FBtr0310424	FBgn0027598	cindr
27598	310070	1	1	2672	7	1	0.10099	chr3R	3;3	30826247	30826253	FBtr0310070	FBgn0027598	cindr
27598	310069	1	1	2666	7	1	0.10099	chr3R	3;3	30826247	30826253	FBtr0310069	FBgn0027598	cindr
27598	310071	1	1	1977	7	1	0.10099	chr3R	3;3	30826247	30826253	FBtr0310071	FBgn0027598	cindr
31975	79534	1	1	1700	7	0.534039	0.0171939	chr2L	C;C	8025885	8025891	FBtr0079534	FBgn0031975	Tg
31975	79533	1	1	1847	7	0.534039	0.0171939	chr2L	C;C	8025885	8025891	FBtr0079533	FBgn0031975	Tg
257	74727	1	1	1507	7	1	0.0148503	chrX	C;C	19567614	19567620	FBtr0074727	FBgn0000257	car
257	331158	1	1	1507	7	1	0.0148503	chrX	C;C	19567614	19567620	FBtr0331158	FBgn0000257	car
257	74728	1	1	1431	7	1	0.0148503	chrX	C;C	19567614	19567620	FBtr0074728	FBgn0000257	car
37832	82274	1	1	594	7	1	0.000727617	chr3R	C;C	10780347	10780353	FBtr0082274	FBgn0037832	Desi
52302	72881	1	1	120	7	0.651555	0.016028	chr3L	C;C	2268945	2268951	FBtr0072881	FBgn0052302	CG32302
52302	72881	1	1	654	7	0.651555	0.055641	chr3L	C;C	2269479	2269485	FBtr0072881	FBgn0052302	CG32302
31844	333517	1	1	1050	7	0.651555	0.0337231	chr2L	3;3	6662435	6662441	FBtr0333517	FBgn0031844	CG13771
31844	79323	1	1	1046	7	0.651555	0.0337231	chr2L	C;C	6662435	6662441	FBtr0079323	FBgn0031844	CG13771
31473	77686	1	1	1234	7	1	0.0467418	chr2L	C;C	2849961	2849967	FBtr0077686	FBgn0031473	CG3104
31473	335132	1	1	1659	7	1	0.0467418	chr2L	C;C	2849961	2849967	FBtr0335132	FBgn0031473	CG3104
31473	77687	1	1	1197	7	1	0.0467418	chr2L	C;C	2849961	2849967	FBtr0077687	FBgn0031473	CG3104
261885	89582	1	1	945	7	0.534039	0.00871576	chr3R	C;C	17716378	17716384	FBtr0089582	FBgn0261885	osa
261885	89582	1	1	2636	7	0.534039	0.116496	chr3R	C;C	17698863	17698869	FBtr0089582	FBgn0261885	osa
261885	89582	1	1	3183	7	1	0.011261	chr3R	C;C	17698316	17698322	FBtr0089582	FBgn0261885	osa
261885	301487	1	1	654	7	0.534039	0.00871576	chr3R	C;C	17716378	17716384	FBtr0301487	FBgn0261885	osa
261885	301487	1	1	2345	7	0.534039	0.116496	chr3R	C;C	17698863	17698869	FBtr0301487	FBgn0261885	osa
261885	301487	1	1	2892	7	1	0.011261	chr3R	C;C	17698316	17698322	FBtr0301487	FBgn0261885	osa
261885	335025	1	1	945	7	0.534039	0.00871576	chr3R	C;C	17716378	17716384	FBtr0335025	FBgn0261885	osa
261885	335025	1	1	2636	7	0.534039	0.116496	chr3R	C;C	17698863	17698869	FBtr0335025	FBgn0261885	osa
261885	335025	1	1	3183	7	1	0.011261	chr3R	C;C	17698316	17698322	FBtr0335025	FBgn0261885	osa
261885	89583	1	1	945	7	0.534039	0.00871576	chr3R	C;C	17716378	17716384	FBtr0089583	FBgn0261885	osa
261885	89583	1	1	2636	7	0.534039	0.116496	chr3R	C;C	17698863	17698869	FBtr0089583	FBgn0261885	osa
261885	89583	1	1	3183	7	1	0.011261	chr3R	C;C	17698316	17698322	FBtr0089583	FBgn0261885	osa
261885	335024	1	1	654	7	0.534039	0.00871576	chr3R	C;C	17716378	17716384	FBtr0335024	FBgn0261885	osa
261885	335024	1	1	2345	7	0.534039	0.116496	chr3R	C;C	17698863	17698869	FBtr0335024	FBgn0261885	osa
261885	335024	1	1	2892	7	1	0.011261	chr3R	C;C	17698316	17698322	FBtr0335024	FBgn0261885	osa
261885	89581	1	1	945	7	0.534039	0.00871576	chr3R	C;C	17716378	17716384	FBtr0089581	FBgn0261885	osa
261885	89581	1	1	2636	7	0.534039	0.116496	chr3R	C;C	17698863	17698869	FBtr0089581	FBgn0261885	osa
261885	89581	1	1	3183	7	1	0.011261	chr3R	C;C	17698316	17698322	FBtr0089581	FBgn0261885	osa
35390	73005	1	1	496	7	0.651555	0.0315182	chr3L	C;C	3045890	3045896	FBtr0073005	FBgn0035390	scramb2
261086	78957	1	1	62	7	0.651555	0.00777135	chr3R	5;5	4319001	4319007	FBtr0078957	FBgn0261086	Syt14
261086	339551	1	1	62	7	0.651555	0.00777135	chr3R	5;5	4319001	4319007	FBtr0339551	FBgn0261086	Syt14
261086	336485	1	1	62	7	0.651555	0.00777135	chr3R	5;5	4319001	4319007	FBtr0336485	FBgn0261086	Syt14
261086	336485	1	1	3177	7	0.534039	0.0684607	chr3R	3;3	4315142	4315148	FBtr0336485	FBgn0261086	Syt14
31250	78094	1	1	1122	7	1	0.0648275	chr2L	C;C	356462	356468	FBtr0078094	FBgn0031250	Ent1
31250	78095	1	1	1073	7	1	0.0648275	chr2L	C;C	356462	356468	FBtr0078095	FBgn0031250	Ent1
31250	330651	1	1	1055	7	1	0.0648275	chr2L	C;C	356462	356468	FBtr0330651	FBgn0031250	Ent1
27491	331670	1	1	104	7	0.534039	0.0579701	chr2L	5;5	10310846	10310852	FBtr0331670	FBgn0027491	Cdk5alpha
11828	72952	1	1	1989	7	0.534039	0.0148527	chr3L	C;C	2608440	2608446	FBtr0072952	FBgn0011828	Pxn
11828	72952	1	1	2858	7	0.534039	0.0514989	chr3L	C;C	2603774	2603780	FBtr0072952	FBgn0011828	Pxn
11828	72954	1	1	1625	7	0.534039	0.0148527	chr3L	C;C	2608440	2608446	FBtr0072954	FBgn0011828	Pxn
11828	72954	1	1	2494	7	0.534039	0.0514989	chr3L	C;C	2603774	2603780	FBtr0072954	FBgn0011828	Pxn
11828	72951	1	1	1931	7	0.534039	0.0148527	chr3L	C;C	2608440	2608446	FBtr0072951	FBgn0011828	Pxn
11828	72951	1	1	2800	7	0.534039	0.0514989	chr3L	C;C	2603774	2603780	FBtr0072951	FBgn0011828	Pxn
11828	72953	1	1	2001	7	0.534039	0.0148527	chr3L	C;C	2608440	2608446	FBtr0072953	FBgn0011828	Pxn
11828	72953	1	1	2870	7	0.534039	0.0514989	chr3L	C;C	2603774	2603780	FBtr0072953	FBgn0011828	Pxn
51087	335233	1	1	1126	7	1	0.176976	chr3R	C;C	25311412	25311418	FBtr0335233	FBgn0051087	CG31087
51087	84855	1	1	1113	7	1	0.176976	chr3R	C;C	25311412	25311418	FBtr0084855	FBgn0051087	CG31087
52319	72714	1	1	770	7	0.534039	0.011185	chr3L	3;3	1471284	1471290	FBtr0072714	FBgn0052319	Naa30B
4394	80392	1	1	2408	7	0.534039	0.00660293	chr2L	C;C	12685088	12685094	FBtr0080392	FBgn0004394	pdm2
4394	340539	1	1	2510	7	0.534039	0.00660293	chr2L	C;C	12685088	12685094	FBtr0340539	FBgn0004394	pdm2
4394	340540	1	1	3067	7	0.534039	0.00660293	chr2L	C;C	12685088	12685094	FBtr0340540	FBgn0004394	pdm2
4394	80393	1	1	952	7	0.534039	0.00660293	chr2L	C;C	12685088	12685094	FBtr0080393	FBgn0004394	pdm2
33058	301687	1	1	1544	7	0.534039	0.00596061	chr2R	C;C	6065999	6066005	FBtr0301687	FBgn0033058	CCHa2-R
33058	85975	1	1	1544	7	0.534039	0.00596061	chr2R	C;C	6065999	6066005	FBtr0085975	FBgn0033058	CCHa2-R
30844	74491	1	1	1062	7	0.651555	0.00406036	chrX	C;C	17567847	17567853	FBtr0074491	FBgn0030844	ppk23
30844	329827	1	1	1062	7	0.651555	0.00406036	chrX	C;C	17567847	17567853	FBtr0329827	FBgn0030844	ppk23
30844	112998	1	1	1062	7	0.651555	0.00406036	chrX	C;C	17567847	17567853	FBtr0112998	FBgn0030844	ppk23
30844	100574	1	1	1062	7	0.651555	0.00406036	chrX	C;C	17567847	17567853	FBtr0100574	FBgn0030844	ppk23
51189	300817	1	1	401	7	0.651555	0.0482357	chr3R	C;C	21045378	21045384	FBtr0300817	FBgn0051189	CG31189
37341	78689	1	1	640	7	0.651555	0.113498	chr3R	C;C	5566678	5566684	FBtr0078689	FBgn0037341	CG12746
37341	78692	1	1	682	7	0.651555	0.113498	chr3R	C;C	5566678	5566684	FBtr0078692	FBgn0037341	CG12746
37341	290215	1	1	810	7	0.651555	0.113498	chr3R	C;C	5566678	5566684	FBtr0290215	FBgn0037341	CG12746
39153	84584	1	1	1312	7	1	0.0333559	chr3R	C;C	24128575	24128581	FBtr0084584	FBgn0039153	GatB
11604	87842	1	1	1160	7	1	0.0838407	chr2R	C;C	12638128	12638134	FBtr0087842	FBgn0011604	Iswi
11604	87842	1	1	2899	7	1	0.00598775	chr2R	C;C	12639926	12639932	FBtr0087842	FBgn0011604	Iswi
11604	87841	1	1	1266	7	1	0.0838407	chr2R	C;C	12638128	12638134	FBtr0087841	FBgn0011604	Iswi
11604	87841	1	1	3005	7	1	0.00598775	chr2R	C;C	12639926	12639932	FBtr0087841	FBgn0011604	Iswi
11604	87843	1	1	1204	7	1	0.0838407	chr2R	C;C	12638128	12638134	FBtr0087843	FBgn0011604	Iswi
11604	87843	1	1	2943	7	1	0.00598775	chr2R	C;C	12639926	12639932	FBtr0087843	FBgn0011604	Iswi
30648	74040	1	1	930	7	1	0.0588561	chrX	3;3	15483965	15483971	FBtr0074040	FBgn0030648	CG6340
30648	74040	1	1	1206	7	1	0.0834967	chrX	3;3	15484241	15484247	FBtr0074040	FBgn0030648	CG6340
53958	99994	1	1	2354	7	1	0.020478	chr2R	3;3	18184697	18184703	FBtr0099994	FBgn0053958	CG33958
53958	99994	1	1	2626	7	0.534039	0.0165295	chr2R	3;3	18184425	18184431	FBtr0099994	FBgn0053958	CG33958
14073	73323	1	1	1722	7	1	0.00849535	chr3L	C;C	4514962	4514968	FBtr0073323	FBgn0014073	Tie
36785	299605	1	1	1301	7	0.651555	0.0110728	chr3L	C;C	18299629	18299635	FBtr0299605	FBgn0036785	CG13700
36785	332865	1	1	1292	7	0.651555	0.0132479	chr3L	C;C	18299629	18299635	FBtr0332865	FBgn0036785	CG13700
36785	332866	1	1	1304	7	0.651555	0.0120159	chr3L	C;C	18299629	18299635	FBtr0332866	FBgn0036785	CG13700
36785	332864	1	1	1295	7	0.651555	0.011297	chr3L	C;C	18299629	18299635	FBtr0332864	FBgn0036785	CG13700
34053	114558	1	1	379	7	1	0.0470837	chr2R	C;C	15945411	15945417	FBtr0114558	FBgn0034053	Cyp4aa1
24230	81288	1	1	303	7	0.534039	0.123223	chr2L	C;C	19444376	19444382	FBtr0081288	FBgn0024230	Hs2st
26147	304951	1	1	6759	7	1	0.00574907	chr2L	3;3	10997133	10997139	FBtr0304951	FBgn0026147	CG16833
26147	304952	1	1	6071	7	1	0.00574907	chr2L	3;3	10997133	10997139	FBtr0304952	FBgn0026147	CG16833
536	308617	1	1	339	7	1	0.165385	chrX	5;5	16278667	16278673	FBtr0308617	FBgn0000536	eas
536	308617	1	1	1699	7	0.651555	0.106582	chrX	5;5	16280027	16280033	FBtr0308617	FBgn0000536	eas
536	74214	1	1	88	7	1	0.165385	chrX	5;5	16278667	16278673	FBtr0074214	FBgn0000536	eas
536	343520	1	1	339	7	1	0.165385	chrX	5;5	16278667	16278673	FBtr0343520	FBgn0000536	eas
536	343520	1	1	1647	7	0.651555	0.106582	chrX	5;5	16280027	16280033	FBtr0343520	FBgn0000536	eas
30870	74462	1	1	490	7	0.534039	0.0598411	chrX	5;C	17831318	17831324	FBtr0074462	FBgn0030870	CG6398
30870	342784	1	1	490	7	0.534039	0.0598411	chrX	5;C	17831318	17831324	FBtr0342784	FBgn0030870	CG6398
29719	70689	1	1	326	7	0.651555	0.00633742	chrX	C;C	4653914	4653920	FBtr0070689	FBgn0029719	CG15473
262508	304812	1	1	2029	7	0.534039	0.0240892	chr3L	C;C	8592219	8592225	FBtr0304812	FBgn0262508	CG43078
39108	345300	1	1	329	7	0.534039	0.0809547	chr3R	C;C	23721107	23721113	FBtr0345300	FBgn0039108	CG10232
86677	333065	1	1	7651	7	1	0.0047357	chr2R	3;3	12087914	12087920	FBtr0333065	FBgn0086677	jeb
86677	333065	1	1	7968	7	1	0.0125415	chr2R	3;3	12087597	12087603	FBtr0333065	FBgn0086677	jeb
4509	336804	1	1	3429	7	0.534039	0.0541228	chr3R	3;3	25353596	25353602	FBtr0336804	FBgn0004509	Fur1
52428	300452	1	1	908	7	0.651555	0.00238232	chr3L	C;C	20470912	20470918	FBtr0300452	FBgn0052428	CG32428
52428	78222	1	1	962	7	0.651555	0.00238232	chr3L	C;C	20470912	20470918	FBtr0078222	FBgn0052428	CG32428
1133	71548	1	1	929	7	0.534039	0.0191579	chr2R	C;C	21010909	21010915	FBtr0071548	FBgn0001133	grau
1133	71548	1	1	1210	7	0.534039	0.0177638	chr2R	C;C	21010504	21010510	FBtr0071548	FBgn0001133	grau
22213	80930	1	1	3157	7	1	0.0978679	chr2L	3;3	16821229	16821235	FBtr0080930	FBgn0022213	Cse1
3366	73393	1	1	4949	7	1	0.0264168	chrX	C;C	11074911	11074917	FBtr0073393	FBgn0003366	sev
50273	346948	1	1	348	7	0.651555	0.0260632	chr2R	C;C	22667630	22667636	FBtr0346948	FBgn0050273	CG30273
50273	346948	1	1	1074	7	0.651555	0.0233546	chr2R	3;3	22668689	22668695	FBtr0346948	FBgn0050273	CG30273
11281	345251	1	1	816	7	1	0.062002	chr3R	3;3	5972155	5972161	FBtr0345251	FBgn0011281	Obp83a
11281	78656	1	1	832	7	1	0.062002	chr3R	3;3	5972155	5972161	FBtr0078656	FBgn0011281	Obp83a
11281	345250	1	1	878	7	1	0.062002	chr3R	3;3	5972155	5972161	FBtr0345250	FBgn0011281	Obp83a
34073	87255	1	1	1966	7	1	0.102372	chr2R	C;C	16100524	16100530	FBtr0087255	FBgn0034073	CG8414
83975	301074	1	1	4198	7	0.651555	0.0793199	chr3R	C;C	20228041	20228047	FBtr0301074	FBgn0083975	Nlg4
83975	301680	1	1	4198	7	0.651555	0.0841417	chr3R	C;C	20228041	20228047	FBtr0301680	FBgn0083975	Nlg4
83975	301075	1	1	4217	7	0.651555	0.0793199	chr3R	C;C	20228041	20228047	FBtr0301075	FBgn0083975	Nlg4
83975	346343	1	1	4198	7	0.651555	0.0793199	chr3R	C;C	20228041	20228047	FBtr0346343	FBgn0083975	Nlg4
30459	73738	1	1	868	7	1	0.010737	chrX	C;C	13191009	13191015	FBtr0073738	FBgn0030459	CG12723
264560	87897	1	1	2901	7	0.651555	0.0054597	chr2R	C;C	12329574	12329580	FBtr0087897	FBgn0264560	garz
264560	305075	1	1	2901	7	0.651555	0.0054597	chr2R	C;C	12329574	12329580	FBtr0305075	FBgn0264560	garz
264560	87898	1	1	2901	7	0.651555	0.0054597	chr2R	C;C	12329574	12329580	FBtr0087898	FBgn0264560	garz
34082	87250	1	1	1369	7	0.534039	0.0267765	chr2R	3;3	16157340	16157346	FBtr0087250	FBgn0034082	CG10734
53888	91892	1	1	362	7	0.534039	0.0633356	chr2L	C;C	21487881	21487887	FBtr0091892	FBgn0053888	His2B:CG33888
261245	74318	1	1	496	7	1	0.00194782	chrX	C;C	16680010	16680016	FBtr0074318	FBgn0261245	sing
16070	76549	1	1	1116	7	0.651555	0.00959325	chr3L	C;C	8994854	8994860	FBtr0076549	FBgn0016070	smg
16070	76550	1	1	1098	7	0.651555	0.00959325	chr3L	C;C	8994854	8994860	FBtr0076550	FBgn0016070	smg
16070	290104	1	1	893	7	0.651555	0.00959325	chr3L	C;C	8994854	8994860	FBtr0290104	FBgn0016070	smg
16070	76551	1	1	990	7	0.651555	0.00959325	chr3L	C;C	8994854	8994860	FBtr0076551	FBgn0016070	smg
16070	290103	1	1	946	7	0.651555	0.00959325	chr3L	C;C	8994854	8994860	FBtr0290103	FBgn0016070	smg
16070	290103	1	1	3369	7	0.534039	0.0666153	chr3L	C;C	8992374	8992380	FBtr0290103	FBgn0016070	smg
250911	290341	1	1	4821	7	0.651555	0.0360835	chr3L	3;3	2641695	2641701	FBtr0290341	FBgn0250911	CG42245
39491	85130	1	1	368	7	1	0.024799	chr3R	C;C	27124314	27124320	FBtr0085130	FBgn0039491	CG6059
39491	85130	1	1	410	7	0.651555	0.07357	chr3R	C;C	27124272	27124278	FBtr0085130	FBgn0039491	CG6059
39491	85130	1	1	2194	7	1	0.283583	chr3R	C;C	27122314	27122320	FBtr0085130	FBgn0039491	CG6059
38819	83919	1	1	962	7	0.534039	0.0771347	chr3R	C;C	20671926	20671932	FBtr0083919	FBgn0038819	Cpr92F
39848	85810	1	1	361	7	0.534039	0.0148103	chr3R	C;C	31459502	31459508	FBtr0085810	FBgn0039848	lox
31431	77750	1	1	935	7	1	0.020899	chr2L	C;C	2551714	2551720	FBtr0077750	FBgn0031431	CG3515
37376	78669	1	1	1008	7	0.651555	0.0591764	chr3R	C;C	5787840	5787846	FBtr0078669	FBgn0037376	Hat1
37376	78669	1	1	1318	7	0.651555	0.0057631	chr3R	C;C	5787530	5787536	FBtr0078669	FBgn0037376	Hat1
37376	78670	1	1	1082	7	0.651555	0.0591764	chr3R	C;C	5787840	5787846	FBtr0078670	FBgn0037376	Hat1
37376	78670	1	1	1392	7	0.651555	0.0057631	chr3R	C;C	5787530	5787536	FBtr0078670	FBgn0037376	Hat1
39016	84324	1	1	1739	7	0.651555	0.036096	chr3R	C;C	22739346	22739352	FBtr0084324	FBgn0039016	Dcr-1
3475	339234	1	1	3009	7	0.651555	0.0280859	chr2L	3;3	20345310	20345316	FBtr0339234	FBgn0003475	spir
25378	344154	1	1	1231	7	1	0.0336699	chrX	3;3	1708815	1708821	FBtr0344154	FBgn0025378	CG3795
31016	309224	1	1	3986	7	1	4.40779e-05	chrX	3;3	19469617	19469623	FBtr0309224	FBgn0031016	kek5
31016	74707	1	1	4019	7	1	4.40779e-05	chrX	3;3	19469617	19469623	FBtr0074707	FBgn0031016	kek5
31016	309223	1	1	4119	7	1	4.40779e-05	chrX	3;3	19469617	19469623	FBtr0309223	FBgn0031016	kek5
31016	74708	1	1	3949	7	1	4.40779e-05	chrX	3;3	19469617	19469623	FBtr0074708	FBgn0031016	kek5
37044	345136	1	1	256	7	0.534039	0.267632	chr3L	C;C	21028462	21028468	FBtr0345136	FBgn0037044	CG10585
37044	78287	1	1	547	7	0.534039	0.267632	chr3L	C;C	21028462	21028468	FBtr0078287	FBgn0037044	CG10585
263738	310382	1	1	690	7	0.534039	0.0425059	chr3R	C;C	18254666	18254672	FBtr0310382	FBgn0263738	Ada2a
263738	310382	1	1	1097	7	1	0.0109485	chr3R	C;C	18254201	18254207	FBtr0310382	FBgn0263738	Ada2a
263738	310381	1	1	735	7	0.534039	0.0425059	chr3R	C;C	18254666	18254672	FBtr0310381	FBgn0263738	Ada2a
263738	310381	1	1	1142	7	1	0.0109485	chr3R	C;C	18254201	18254207	FBtr0310381	FBgn0263738	Ada2a
263738	310383	1	1	735	7	0.534039	0.0425059	chr3R	C;C	18254666	18254672	FBtr0310383	FBgn0263738	Ada2a
263738	310383	1	1	1142	7	1	0.0109485	chr3R	C;C	18254201	18254207	FBtr0310383	FBgn0263738	Ada2a
263738	310384	1	1	690	7	0.534039	0.0425059	chr3R	C;C	18254666	18254672	FBtr0310384	FBgn0263738	Ada2a
263738	310384	1	1	1097	7	1	0.0109485	chr3R	C;C	18254201	18254207	FBtr0310384	FBgn0263738	Ada2a
263738	310380	1	1	690	7	0.534039	0.0425059	chr3R	C;C	18254666	18254672	FBtr0310380	FBgn0263738	Ada2a
263738	310380	1	1	1097	7	1	0.0109485	chr3R	C;C	18254201	18254207	FBtr0310380	FBgn0263738	Ada2a
38505	83437	1	1	3	7	0.534039	3.10007e-06	chr3R	5;C	17407879	17407885	FBtr0083437	FBgn0038505	CG17283
38505	83437	1	1	873	7	0.651555	0.00689174	chr3R	C;C	17408749	17408755	FBtr0083437	FBgn0038505	CG17283
35567	73367	1	1	586	7	1	0.163212	chr3L	C;C	4688182	4688188	FBtr0073367	FBgn0035567	CG7514
34103	87136	1	1	265	7	0.651555	0.180673	chr2R	C;C	16280280	16280286	FBtr0087136	FBgn0034103	prim
39665	85434	1	1	1266	7	1	0.00990724	chr3R	3;3	29491530	29491536	FBtr0085434	FBgn0039665	CG2310
39665	85433	1	1	1070	7	1	0.00990724	chr3R	3;3	29491530	29491536	FBtr0085433	FBgn0039665	CG2310
38204	301280	1	1	270	7	0.651555	0.00460913	chr3R	C;C	14111890	14111896	FBtr0301280	FBgn0038204	CG14357
3510	346862	1	1	559	7	0.534039	0.66124	chr3R	5;5	30040331	30040337	FBtr0346862	FBgn0003510	Sry-alpha
33960	87472	1	1	779	7	0.534039	0.0393696	chr2R	C;C	14755000	14755006	FBtr0087472	FBgn0033960	CG10151
33960	87472	1	1	1108	7	0.651555	0.0592327	chr2R	C;C	14754671	14754677	FBtr0087472	FBgn0033960	CG10151
33960	87473	1	1	649	7	0.534039	0.0393696	chr2R	C;C	14755000	14755006	FBtr0087473	FBgn0033960	CG10151
33960	87473	1	1	978	7	0.651555	0.0592327	chr2R	C;C	14754671	14754677	FBtr0087473	FBgn0033960	CG10151
33960	289934	1	1	779	7	0.534039	0.0393696	chr2R	C;C	14755000	14755006	FBtr0289934	FBgn0033960	CG10151
33960	289934	1	1	1108	7	0.651555	0.0592327	chr2R	C;C	14754671	14754677	FBtr0289934	FBgn0033960	CG10151
33960	87471	1	1	638	7	0.534039	0.0393696	chr2R	C;C	14755000	14755006	FBtr0087471	FBgn0033960	CG10151
33960	87471	1	1	967	7	0.651555	0.0592327	chr2R	C;C	14754671	14754677	FBtr0087471	FBgn0033960	CG10151
29697	70645	1	1	887	7	0.534039	0.00733824	chrX	C;C	4219122	4219128	FBtr0070645	FBgn0029697	CG15570
26206	333475	1	1	3234	7	0.534039	0.0405097	chrX	C;C	9168944	9168950	FBtr0333475	FBgn0026206	mei-P26
26206	333475	1	1	3558	7	1	0.0155374	chrX	C;C	9169522	9169528	FBtr0333475	FBgn0026206	mei-P26
26206	333473	1	1	2796	7	0.534039	0.0405097	chrX	C;C	9168944	9168950	FBtr0333473	FBgn0026206	mei-P26
26206	333473	1	1	3120	7	1	0.0155374	chrX	C;C	9169522	9169528	FBtr0333473	FBgn0026206	mei-P26
26206	333473	1	1	15053	7	1	0.190977	chrX	3;3	9181783	9181789	FBtr0333473	FBgn0026206	mei-P26
26206	333474	1	1	3206	7	0.534039	0.0405097	chrX	C;C	9168944	9168950	FBtr0333474	FBgn0026206	mei-P26
26206	333474	1	1	3581	7	1	0.0129358	chrX	C;C	9169522	9169528	FBtr0333474	FBgn0026206	mei-P26
26206	333474	1	1	15514	7	1	0.190977	chrX	3;3	9181783	9181789	FBtr0333474	FBgn0026206	mei-P26
26206	71303	1	1	3098	7	0.534039	0.0405097	chrX	C;C	9168944	9168950	FBtr0071303	FBgn0026206	mei-P26
26206	71303	1	1	3422	7	1	0.0155374	chrX	C;C	9169522	9169528	FBtr0071303	FBgn0026206	mei-P26
26206	340341	1	1	2781	7	0.534039	0.0405097	chrX	C;C	9168944	9168950	FBtr0340341	FBgn0026206	mei-P26
26206	340341	1	1	3156	7	1	0.0129358	chrX	C;C	9169522	9169528	FBtr0340341	FBgn0026206	mei-P26
264978	335169	1	1	521	7	1	0.594746	chr2L	C;C	2492013	2492019	FBtr0335169	FBgn0264978	Slh
264978	335169	1	1	3617	7	0.651555	0.0421988	chr2L	3;3	2488793	2488799	FBtr0335169	FBgn0264978	Slh
264978	77782	1	1	521	7	1	0.594746	chr2L	C;C	2492013	2492019	FBtr0077782	FBgn0264978	Slh
13997	75999	1	1	1785	7	0.534039	0.132724	chr3L	C;C	12153267	12153273	FBtr0075999	FBgn0013997	Nrx-IV
13997	75999	1	1	1854	7	1	0.014545	chr3L	C;C	12153336	12153342	FBtr0075999	FBgn0013997	Nrx-IV
13997	75998	1	1	1785	7	0.534039	0.132724	chr3L	C;C	12153267	12153273	FBtr0075998	FBgn0013997	Nrx-IV
13997	75998	1	1	1854	7	1	0.014545	chr3L	C;C	12153336	12153342	FBtr0075998	FBgn0013997	Nrx-IV
39398	84948	1	1	1307	7	0.651555	0.270897	chr3R	C;C	25960710	25960716	FBtr0084948	FBgn0039398	CG14540
30204	71462	1	1	243	7	0.534039	0.0628463	chrX	C;C	10459427	10459433	FBtr0071462	FBgn0030204	Or9a
284435	345993	1	1	571	7	1	0.0359891	chrX	5;5	143404	143410	FBtr0345993	FBgn0284435	tyn
284435	345994	1	1	642	7	1	0.0359891	chrX	5;5	143404	143410	FBtr0345994	FBgn0284435	tyn
284435	340057	1	1	551	7	1	0.0359891	chrX	5;5	143404	143410	FBtr0340057	FBgn0284435	tyn
86130	78009	1	1	49	7	0.534039	0.129299	chr2L	5;C	811633	811639	FBtr0078009	FBgn0086130	Dbp21E2
259938	305152	1	1	3429	7	0.534039	0.00925286	chr3R	C;C	10399090	10399096	FBtr0305152	FBgn0259938	cwo
259938	305152	1	1	4220	7	1	0.0590691	chr3R	3;3	10399881	10399887	FBtr0305152	FBgn0259938	cwo
259938	305151	1	1	2845	7	0.534039	0.00925286	chr3R	C;C	10399090	10399096	FBtr0305151	FBgn0259938	cwo
259938	305151	1	1	3636	7	1	0.0590691	chr3R	3;3	10399881	10399887	FBtr0305151	FBgn0259938	cwo
259938	82246	1	1	2969	7	0.534039	0.00925286	chr3R	C;C	10399090	10399096	FBtr0082246	FBgn0259938	cwo
259938	82246	1	1	3760	7	1	0.0590691	chr3R	3;3	10399881	10399887	FBtr0082246	FBgn0259938	cwo
33973	87449	1	1	1815	7	0.534039	0.00169601	chr2R	C;C	14857244	14857250	FBtr0087449	FBgn0033973	HPS1
37432	81710	1	1	671	7	0.534039	0.395863	chr3R	3;3	6343726	6343732	FBtr0081710	FBgn0037432	CG10298
37901	82402	1	1	853	7	0.534039	0.27662	chr3R	C;C	11434782	11434788	FBtr0082402	FBgn0037901	CG6744
37901	308211	1	1	757	7	0.534039	0.27662	chr3R	C;C	11434782	11434788	FBtr0308211	FBgn0037901	CG6744
31961	343419	1	1	1290	7	1	0.0558979	chr2L	C;C	7884331	7884337	FBtr0343419	FBgn0031961	CG7102
31961	79559	1	1	1290	7	1	0.0558979	chr2L	C;C	7884331	7884337	FBtr0079559	FBgn0031961	CG7102
31875	79350	1	1	904	7	1	0.0168444	chr2L	C;C	6957912	6957918	FBtr0079350	FBgn0031875	CG3430
31875	79350	1	1	1359	7	1	0.00953541	chr2L	C;C	6958425	6958431	FBtr0079350	FBgn0031875	CG3430
39079	273202	1	1	1183	7	1	0.158812	chr3R	C;C	23485046	23485052	FBtr0273202	FBgn0039079	Ir94g
39079	273202	1	1	1423	7	0.651555	0.0148532	chr3R	C;C	23485286	23485292	FBtr0273202	FBgn0039079	Ir94g
38809	300803	1	1	1214	7	1	0.0182847	chr3R	C;C	20583607	20583613	FBtr0300803	FBgn0038809	CG16953
38679	83729	1	1	3964	7	0.534039	0.0595198	chr3R	C;C	19129084	19129090	FBtr0083729	FBgn0038679	CG6040
51548	78736	1	1	618	7	1	0.0129016	chr3R	C;C	5636228	5636234	FBtr0078736	FBgn0051548	CG31548
38363	334591	1	1	273	7	0.651555	0.0419012	chr3R	C;C	15793084	15793090	FBtr0334591	FBgn0038363	Acyp2
38363	83174	1	1	273	7	0.651555	0.0419012	chr3R	C;C	15793084	15793090	FBtr0083174	FBgn0038363	Acyp2
38511	83442	1	1	1609	7	1	0.0131098	chr3R	C;C	17444843	17444849	FBtr0083442	FBgn0038511	cysu
38511	83442	1	1	2913	7	0.651555	0.0450297	chr3R	3;3	17446332	17446338	FBtr0083442	FBgn0038511	cysu
51388	304709	1	1	1212	7	0.534039	0.0174609	chr3R	3;3	11239420	11239426	FBtr0304709	FBgn0051388	CG31388
51388	304709	1	1	1216	7	0.651555	0.0151212	chr3R	3;3	11239424	11239430	FBtr0304709	FBgn0051388	CG31388
51388	82356	1	1	1122	7	0.534039	0.0174609	chr3R	C;C	11239420	11239426	FBtr0082356	FBgn0051388	CG31388
51388	82356	1	1	1126	7	0.651555	0.0151212	chr3R	C;C	11239424	11239430	FBtr0082356	FBgn0051388	CG31388
31622	77422	1	1	852	7	1	0.178872	chr2L	C;C	4689791	4689797	FBtr0077422	FBgn0031622	CG3251
51800	81179	1	1	459	7	0.534039	0.392668	chr2L	C;C	19034000	19034006	FBtr0081179	FBgn0051800	CG31800
51800	81179	1	1	597	7	1	0.0085114	chr2L	C;C	19033804	19033810	FBtr0081179	FBgn0051800	CG31800
51163	305036	1	1	950	7	1	0.12741	chr3R	5;5	22174154	22174160	FBtr0305036	FBgn0051163	SKIP
51163	305036	1	1	3901	7	0.651555	0.00935484	chr3R	C;C	22293057	22293063	FBtr0305036	FBgn0051163	SKIP
51163	305037	1	1	945	7	1	0.12741	chr3R	5;5	22174154	22174160	FBtr0305037	FBgn0051163	SKIP
51163	305037	1	1	3785	7	0.651555	0.0361856	chr3R	C;C	22293057	22293063	FBtr0305037	FBgn0051163	SKIP
51163	301028	1	1	945	7	1	0.12741	chr3R	5;5	22174154	22174160	FBtr0301028	FBgn0051163	SKIP
51163	301028	1	1	3896	7	0.651555	0.00935484	chr3R	C;C	22293057	22293063	FBtr0301028	FBgn0051163	SKIP
51163	330381	1	1	945	7	1	0.12741	chr3R	5;5	22174154	22174160	FBtr0330381	FBgn0051163	SKIP
51163	330381	1	1	3560	7	0.651555	0.00935484	chr3R	C;C	22293057	22293063	FBtr0330381	FBgn0051163	SKIP
51163	336712	1	1	1146	7	1	0.12741	chr3R	5;5	22174154	22174160	FBtr0336712	FBgn0051163	SKIP
51163	336712	1	1	3986	7	0.651555	0.00935484	chr3R	C;C	22293057	22293063	FBtr0336712	FBgn0051163	SKIP
51163	84197	1	1	945	7	1	0.12741	chr3R	5;5	22174154	22174160	FBtr0084197	FBgn0051163	SKIP
51163	84197	1	1	3560	7	0.651555	0.00935484	chr3R	C;C	22293057	22293063	FBtr0084197	FBgn0051163	SKIP
31762	332602	1	1	2377	7	1	0.0229656	chr2L	C;C	6008760	6008766	FBtr0332602	FBgn0031762	CG9098
31762	332602	1	1	2905	7	0.651555	0.0562299	chr2L	C;C	6007922	6007928	FBtr0332602	FBgn0031762	CG9098
31762	79228	1	1	2388	7	1	0.0229656	chr2L	C;C	6008760	6008766	FBtr0079228	FBgn0031762	CG9098
31762	79228	1	1	2916	7	0.651555	0.0562299	chr2L	C;C	6007922	6007928	FBtr0079228	FBgn0031762	CG9098
31762	79229	1	1	2046	7	1	0.0229656	chr2L	C;C	6008760	6008766	FBtr0079229	FBgn0031762	CG9098
31762	79229	1	1	2574	7	0.651555	0.0562299	chr2L	C;C	6007922	6007928	FBtr0079229	FBgn0031762	CG9098
38816	334641	1	1	117	7	0.651555	0.299332	chr3R	5;5	20635597	20635603	FBtr0334641	FBgn0038816	Lrrk
38816	334641	1	1	3886	7	1	0.00616056	chr3R	C;C	20639955	20639961	FBtr0334641	FBgn0038816	Lrrk
38816	112788	1	1	3613	7	1	0.00616056	chr3R	C;C	20639955	20639961	FBtr0112788	FBgn0038816	Lrrk
38816	334640	1	1	117	7	0.651555	0.356196	chr3R	5;5	20635597	20635603	FBtr0334640	FBgn0038816	Lrrk
38816	334640	1	1	3613	7	1	0.00616056	chr3R	C;C	20639955	20639961	FBtr0334640	FBgn0038816	Lrrk
34518	100495	1	1	821	7	1	0.00434854	chr2R	C;C	20551137	20551143	FBtr0100495	FBgn0034518	CG13430
34518	100496	1	1	199	7	1	0.00434854	chr2R	C;C	20551137	20551143	FBtr0100496	FBgn0034518	CG13430
265002	335509	1	1	975	7	0.534039	0.0345459	chr2L	C;C	10137165	10137171	FBtr0335509	FBgn0265002	CG44153
265002	335509	1	1	3096	7	0.651555	0.0195396	chr2L	C;C	10081249	10081255	FBtr0335509	FBgn0265002	CG44153
265002	335510	1	1	975	7	0.534039	0.0345459	chr2L	C;C	10137165	10137171	FBtr0335510	FBgn0265002	CG44153
265002	335510	1	1	3096	7	0.651555	0.0195396	chr2L	C;C	10081249	10081255	FBtr0335510	FBgn0265002	CG44153
37924	82418	1	1	1307	7	0.534039	0.0488905	chr3R	C;C	11630264	11630270	FBtr0082418	FBgn0037924	CG14712
24920	343784	1	1	107	7	0.534039	0.0152462	chr2L	C;C	2969525	2969531	FBtr0343784	FBgn0024920	Ts
24920	77679	1	1	107	7	0.534039	0.0152462	chr2L	C;C	2969525	2969531	FBtr0077679	FBgn0024920	Ts
37763	82154	1	1	280	7	1	0.00641306	chr3R	C;C	9816621	9816627	FBtr0082154	FBgn0037763	CG16904
34308	345416	1	1	1533	7	0.534039	0.00708768	chr2R	C;C	18162920	18162926	FBtr0345416	FBgn0034308	CG10915
34308	86746	1	1	1533	7	0.534039	0.00708768	chr2R	C;C	18162920	18162926	FBtr0086746	FBgn0034308	CG10915
39909	89105	1	1	774	7	1	0.0184623	chr4	C;C	569145	569151	FBtr0089105	FBgn0039909	ND-49
39909	333676	1	1	785	7	1	0.0184623	chr4	C;C	569145	569151	FBtr0333676	FBgn0039909	ND-49
29997	340140	1	1	1069	7	0.534039	0.0155829	chrX	C;C	8098795	8098801	FBtr0340140	FBgn0029997	CG2258
29997	71111	1	1	1505	7	0.534039	0.0155829	chrX	C;C	8098795	8098801	FBtr0071111	FBgn0029997	CG2258
29997	71109	1	1	1710	7	0.534039	0.0155829	chrX	C;C	8098795	8098801	FBtr0071109	FBgn0029997	CG2258
29997	71110	1	1	1046	7	0.534039	0.0155829	chrX	C;C	8098795	8098801	FBtr0071110	FBgn0029997	CG2258
39188	84629	1	1	882	7	0.534039	0.0275284	chr3R	C;C	24357050	24357056	FBtr0084629	FBgn0039188	Golgin84
34824	71975	1	1	1611	7	0.651555	0.0061533	chr2R	C;C	23124425	23124431	FBtr0071975	FBgn0034824	Klp59C
30625	74001	1	1	995	7	0.534039	5.97546e-05	chrX	C;C	15294469	15294475	FBtr0074001	FBgn0030625	CG5877
30625	340433	1	1	995	7	0.534039	5.97546e-05	chrX	C;C	15294469	15294475	FBtr0340433	FBgn0030625	CG5877
30625	74002	1	1	274	7	0.534039	5.97546e-05	chrX	C;C	15294469	15294475	FBtr0074002	FBgn0030625	CG5877
46258	85217	1	1	1847	7	0.651555	0.0350623	chr3R	3;3	27692744	27692750	FBtr0085217	FBgn0046258	CG12880
35348	306577	1	1	976	7	0.651555	0.000734125	chr3L	C;C	2500073	2500079	FBtr0306577	FBgn0035348	CG16758
35348	72965	1	1	808	7	0.651555	0.000734125	chr3L	C;C	2500073	2500079	FBtr0072965	FBgn0035348	CG16758
35348	331414	1	1	1048	7	0.651555	0.000734125	chr3L	C;C	2500073	2500079	FBtr0331414	FBgn0035348	CG16758
35348	72966	1	1	604	7	0.651555	0.000734125	chr3L	C;C	2500073	2500079	FBtr0072966	FBgn0035348	CG16758
35348	72963	1	1	919	7	0.651555	0.000734125	chr3L	C;C	2500073	2500079	FBtr0072963	FBgn0035348	CG16758
35348	72964	1	1	847	7	0.651555	0.000734125	chr3L	C;C	2500073	2500079	FBtr0072964	FBgn0035348	CG16758
33813	87742	1	1	244	7	0.534039	0.045404	chr2R	C;C	13230888	13230894	FBtr0087742	FBgn0033813	fsd
15379	77193	1	1	90	7	0.534039	0.0348603	chrX	5;C	21345448	21345454	FBtr0077193	FBgn0015379	dod
268063	76793	1	1	2771	7	0.534039	0.0122898	chr3L	3;3	7527163	7527169	FBtr0076793	FBgn0268063	ltl
268063	332144	1	1	3257	7	0.534039	0.0122898	chr3L	3;3	7527163	7527169	FBtr0332144	FBgn0268063	ltl
263511	70781	1	1	1184	7	0.534039	0.0352048	chrX	C;C	5606433	5606439	FBtr0070781	FBgn0263511	Vsx1
263511	340495	1	1	1184	7	0.534039	0.0352048	chrX	C;C	5606433	5606439	FBtr0340495	FBgn0263511	Vsx1
31688	79061	1	1	1644	7	0.651555	0.531837	chr2L	3;3	5209317	5209323	FBtr0079061	FBgn0031688	Cyp28d2
2609	84958	1	1	504	7	1	0.0171412	chr3R	C;C	26022327	26022333	FBtr0084958	FBgn0002609	E(spl)m3-HLH
264489	332826	1	1	2019	7	1	0.0709743	chr3L	3;3	9833817	9833823	FBtr0332826	FBgn0264489	CG43897
264489	332822	1	1	2270	7	1	0.0709743	chr3L	3;3	9833817	9833823	FBtr0332822	FBgn0264489	CG43897
264489	332833	1	1	2384	7	1	0.0709743	chr3L	3;3	9833817	9833823	FBtr0332833	FBgn0264489	CG43897
264489	332830	1	1	5400	7	1	0.0709743	chr3L	3;3	9833817	9833823	FBtr0332830	FBgn0264489	CG43897
264489	332819	1	1	2711	7	1	0.0709743	chr3L	3;3	9833817	9833823	FBtr0332819	FBgn0264489	CG43897
264489	332828	1	1	2545	7	1	0.0709743	chr3L	3;3	9833817	9833823	FBtr0332828	FBgn0264489	CG43897
264489	332835	1	1	2739	7	1	0.0709743	chr3L	3;3	9833817	9833823	FBtr0332835	FBgn0264489	CG43897
264489	332820	1	1	1986	7	1	0.0709743	chr3L	3;3	9833817	9833823	FBtr0332820	FBgn0264489	CG43897
264489	332832	1	1	3017	7	1	0.0709743	chr3L	3;3	9833817	9833823	FBtr0332832	FBgn0264489	CG43897
264489	332829	1	1	2578	7	1	0.0709743	chr3L	3;3	9833817	9833823	FBtr0332829	FBgn0264489	CG43897
264489	332827	1	1	2547	7	1	0.0709743	chr3L	3;3	9833817	9833823	FBtr0332827	FBgn0264489	CG43897
264489	332821	1	1	2968	7	1	0.0709743	chr3L	3;3	9833817	9833823	FBtr0332821	FBgn0264489	CG43897
264489	332834	1	1	2298	7	1	0.0709743	chr3L	3;3	9833817	9833823	FBtr0332834	FBgn0264489	CG43897
264489	332831	1	1	5058	7	1	0.0709743	chr3L	3;3	9833817	9833823	FBtr0332831	FBgn0264489	CG43897
264489	332825	1	1	2273	7	1	0.0709743	chr3L	3;3	9833817	9833823	FBtr0332825	FBgn0264489	CG43897
264489	332823	1	1	2427	7	1	0.0709743	chr3L	3;3	9833817	9833823	FBtr0332823	FBgn0264489	CG43897
264489	332824	1	1	2527	7	1	0.0709743	chr3L	3;3	9833817	9833823	FBtr0332824	FBgn0264489	CG43897
53156	87681	1	1	234	7	1	0.0329367	chr2R	5;5	13552189	13552195	FBtr0087681	FBgn0053156	CG33156
53156	87682	1	1	234	7	1	0.0329367	chr2R	C;C	13552189	13552195	FBtr0087682	FBgn0053156	CG33156
34496	86304	1	1	1816	7	1	0.0029621	chr2R	C;C	20276978	20276984	FBtr0086304	FBgn0034496	CG9143
2535	333555	1	1	469	7	0.534039	0.576337	chr2R	3;3	8438173	8438179	FBtr0333555	FBgn0002535	Lcp4
2535	88744	1	1	469	7	0.534039	0.547946	chr2R	3;3	8438173	8438179	FBtr0088744	FBgn0002535	Lcp4
31492	77648	1	1	1531	7	0.651555	0.0110023	chr2L	C;C	3024872	3024878	FBtr0077648	FBgn0031492	CG3542
52987	79735	1	1	260	7	1	0.0610449	chr2L	C;C	8864071	8864077	FBtr0079735	FBgn0052987	CG32987
30863	340633	1	1	1112	7	0.534039	0.0592274	chrX	C;C	17701095	17701101	FBtr0340633	FBgn0030863	CG8188
30863	74476	1	1	1359	7	0.534039	0.0592274	chrX	C;C	17701095	17701101	FBtr0074476	FBgn0030863	CG8188
30863	346186	1	1	1112	7	0.534039	0.0592274	chrX	C;C	17701095	17701101	FBtr0346186	FBgn0030863	CG8188
30863	100463	1	1	1112	7	0.534039	0.0592274	chrX	C;C	17701095	17701101	FBtr0100463	FBgn0030863	CG8188
285913	82923	1	1	1046	7	0.651555	0.194315	chr3R	C;C	14300945	14300951	FBtr0082923	FBgn0285913	red
285913	309997	1	1	932	7	0.651555	0.194315	chr3R	C;C	14300945	14300951	FBtr0309997	FBgn0285913	red
285913	82921	1	1	1193	7	0.651555	0.194315	chr3R	C;C	14300945	14300951	FBtr0082921	FBgn0285913	red
285913	344157	1	1	1412	7	0.651555	0.194315	chr3R	C;C	14300945	14300951	FBtr0344157	FBgn0285913	red
285913	309998	1	1	804	7	0.651555	0.194315	chr3R	C;C	14300945	14300951	FBtr0309998	FBgn0285913	red
285913	309999	1	1	990	7	0.651555	0.194315	chr3R	C;C	14300945	14300951	FBtr0309999	FBgn0285913	red
285913	82922	1	1	874	7	0.651555	0.194315	chr3R	C;C	14300945	14300951	FBtr0082922	FBgn0285913	red
39313	89644	1	1	619	7	1	0.0688975	chr3R	C;C	25282280	25282286	FBtr0089644	FBgn0039313	CG11892
39313	89645	1	1	689	7	1	0.0688975	chr3R	C;C	25282280	25282286	FBtr0089645	FBgn0039313	CG11892
34513	86217	1	1	669	7	0.534039	0.0186039	chr2R	C;C	20537308	20537314	FBtr0086217	FBgn0034513	CG13423
34513	86217	1	1	676	7	1	0.000838179	chr2R	C;C	20537315	20537321	FBtr0086217	FBgn0034513	CG13423
29746	344669	1	1	3630	7	1	0.166651	chrX	C;C	5175682	5175688	FBtr0344669	FBgn0029746	CG15465
29746	344669	1	1	12420	7	0.534039	0.031818	chrX	3;3	5247391	5247397	FBtr0344669	FBgn0029746	CG15465
29746	344669	1	1	15065	7	1	0.0278438	chrX	3;3	5250423	5250429	FBtr0344669	FBgn0029746	CG15465
29746	70742	1	1	974	7	1	0.166651	chrX	C;C	5175682	5175688	FBtr0070742	FBgn0029746	CG15465
29746	70742	1	1	9143	7	0.534039	0.031818	chrX	3;3	5247391	5247397	FBtr0070742	FBgn0029746	CG15465
29746	70742	1	1	11788	7	1	0.0278438	chrX	3;3	5250423	5250429	FBtr0070742	FBgn0029746	CG15465
261993	303823	1	1	493	7	0.651555	0.0119902	chr3R	C;C	24366669	24366675	FBtr0303823	FBgn0261993	CG42811
266557	308253	1	1	3917	7	1	0.0142303	chr2L	C;C	238788	238794	FBtr0308253	FBgn0266557	kis
266557	308253	1	1	11882	7	0.651555	0.0171795	chr2L	C;C	217235	217241	FBtr0308253	FBgn0266557	kis
266557	308255	1	1	4098	7	1	0.0142303	chr2L	C;C	238788	238794	FBtr0308255	FBgn0266557	kis
266557	308255	1	1	11607	7	0.651555	0.0171795	chr2L	C;C	217235	217241	FBtr0308255	FBgn0266557	kis
266557	78145	1	1	2101	7	0.651555	0.0171795	chr2L	C;C	217235	217241	FBtr0078145	FBgn0266557	kis
266557	78144	1	1	3917	7	1	0.0142303	chr2L	C;C	238788	238794	FBtr0078144	FBgn0266557	kis
266557	78144	1	1	11819	7	0.651555	0.0171795	chr2L	C;C	217235	217241	FBtr0078144	FBgn0266557	kis
266557	299837	1	1	3917	7	1	0.0142303	chr2L	C;C	238788	238794	FBtr0299837	FBgn0266557	kis
266557	299837	1	1	12404	7	0.651555	0.0171795	chr2L	C;C	217235	217241	FBtr0299837	FBgn0266557	kis
266557	308254	1	1	3917	7	1	0.0142303	chr2L	C;C	238788	238794	FBtr0308254	FBgn0266557	kis
266557	308254	1	1	11609	7	0.651555	0.0171795	chr2L	C;C	217235	217241	FBtr0308254	FBgn0266557	kis
30803	310519	1	1	662	7	0.534039	0.093652	chrX	C;C	16887755	16887761	FBtr0310519	FBgn0030803	CG4880
30803	310519	1	1	845	7	0.534039	0.0421225	chrX	C;C	16887938	16887944	FBtr0310519	FBgn0030803	CG4880
30803	74342	1	1	725	7	0.534039	0.093652	chrX	C;C	16887755	16887761	FBtr0074342	FBgn0030803	CG4880
30803	74342	1	1	908	7	0.534039	0.0421225	chrX	C;C	16887938	16887944	FBtr0074342	FBgn0030803	CG4880
27836	86773	1	1	160	7	0.651555	0.00674302	chr2R	5;5	18172441	18172447	FBtr0086773	FBgn0027836	Dgp-1
40091	71934	1	1	1164	7	0.534039	0.0549106	chr2R	C;C	22642479	22642485	FBtr0071934	FBgn0040091	Ugt58Fa
40091	345505	1	1	1164	7	0.534039	0.0549106	chr2R	C;C	22642479	22642485	FBtr0345505	FBgn0040091	Ugt58Fa
40396	70508	1	1	688	7	0.651555	0.0352984	chrX	C;C	3175981	3175987	FBtr0070508	FBgn0040396	CG3939
40396	343600	1	1	504	7	0.651555	0.0352984	chrX	C;C	3175981	3175987	FBtr0343600	FBgn0040396	CG3939
52698	336923	1	1	5664	7	0.651555	0.0222022	chrX	3;3	9852907	9852913	FBtr0336923	FBgn0052698	CG32698
53906	91910	1	1	362	7	0.534039	0.0633356	chr2L	C;C	21433348	21433354	FBtr0091910	FBgn0053906	His2B:CG33906
31739	79160	1	1	171	7	1	0.0225568	chr2L	C;C	5801798	5801804	FBtr0079160	FBgn0031739	CG14005
31739	332037	1	1	171	7	1	0.0225568	chr2L	C;C	5801798	5801804	FBtr0332037	FBgn0031739	CG14005
50047	87905	1	1	1620	7	0.651555	0.0669617	chr2R	C;C	12353995	12354001	FBtr0087905	FBgn0050047	CG30047
43025	75192	1	1	555	7	0.534039	0.0634889	chr3L	C;C	17756375	17756381	FBtr0075192	FBgn0043025	Adgf-A2
43025	110847	1	1	535	7	0.534039	0.0634889	chr3L	C;C	17756375	17756381	FBtr0110847	FBgn0043025	Adgf-A2
43025	110846	1	1	541	7	0.534039	0.0634889	chr3L	C;C	17756375	17756381	FBtr0110846	FBgn0043025	Adgf-A2
31281	332974	1	1	1072	7	0.534039	0.00466585	chr2L	C;C	814757	814763	FBtr0332974	FBgn0031281	Saf6
31281	78041	1	1	1081	7	0.534039	0.00466585	chr2L	C;C	814757	814763	FBtr0078041	FBgn0031281	Saf6
33712	339628	1	1	102	7	0.534039	0.139316	chr2R	5;C	12321340	12321346	FBtr0339628	FBgn0033712	mIF3
33712	472670	1	1	102	7	0.534039	0.139316	chr2R	5;C	12321340	12321346	FBtr0472670	FBgn0033712	mIF3
33712	87896	1	1	102	7	0.534039	0.139316	chr2R	5;C	12321340	12321346	FBtr0087896	FBgn0033712	mIF3
36235	290131	1	1	2745	7	0.534039	0.111893	chr3L	C;C	11988692	11988698	FBtr0290131	FBgn0036235	CG6938
36235	330171	1	1	2745	7	0.534039	0.111893	chr3L	C;C	11988692	11988698	FBtr0330171	FBgn0036235	CG6938
52174	299819	1	1	1550	7	1	0.0906388	chr3L	5;5	17431634	17431640	FBtr0299819	FBgn0052174	CG32174
39904	89126	1	1	4943	7	0.651555	0.00276858	chr4	C;C	372382	372388	FBtr0089126	FBgn0039904	Hcf
39904	345284	1	1	4639	7	0.651555	0.00276858	chr4	C;C	372382	372388	FBtr0345284	FBgn0039904	Hcf
39904	345284	1	1	6823	7	0.651555	0.0566917	chr4	3;3	374566	374572	FBtr0345284	FBgn0039904	Hcf
39904	345284	1	1	7467	7	0.651555	0.187053	chr4	3;3	375210	375216	FBtr0345284	FBgn0039904	Hcf
39904	307379	1	1	4969	7	0.651555	0.00276858	chr4	C;C	372382	372388	FBtr0307379	FBgn0039904	Hcf
39904	89125	1	1	4639	7	0.651555	0.00276858	chr4	C;C	372382	372388	FBtr0089125	FBgn0039904	Hcf
39904	89125	1	1	6823	7	0.651555	0.0566917	chr4	3;3	374566	374572	FBtr0089125	FBgn0039904	Hcf
39904	334479	1	1	4787	7	0.651555	0.00276858	chr4	C;C	372382	372388	FBtr0334479	FBgn0039904	Hcf
85486	112763	1	1	898	7	1	0.00794443	chr2R	C;C	16671396	16671402	FBtr0112763	FBgn0085486	CG34457
85486	345621	1	1	826	7	1	0.00794443	chr2R	C;C	16671396	16671402	FBtr0345621	FBgn0085486	CG34457
26143	70182	1	1	1532	7	1	0.00107455	chrX	C;C	1028966	1028972	FBtr0070182	FBgn0026143	CDC45L
29506	336871	1	1	336	7	0.651555	0.0182343	chr2R	C;C	7017196	7017202	FBtr0336871	FBgn0029506	Tsp42Ee
29506	86180	1	1	349	7	0.651555	0.0182343	chr2R	C;C	7017196	7017202	FBtr0086180	FBgn0029506	Tsp42Ee
30685	340307	1	1	1223	7	0.651555	0.0769336	chrX	C;C	15755537	15755543	FBtr0340307	FBgn0030685	Graf
30685	74197	1	1	415	7	1	0.000947641	chrX	5;5	15760171	15760177	FBtr0074197	FBgn0030685	Graf
30685	74197	1	1	1281	7	0.651555	0.0769336	chrX	C;C	15755537	15755543	FBtr0074197	FBgn0030685	Graf
30685	74198	1	1	1223	7	0.651555	0.0769336	chrX	C;C	15755537	15755543	FBtr0074198	FBgn0030685	Graf
30685	74194	1	1	996	7	0.651555	0.0769336	chrX	C;C	15755537	15755543	FBtr0074194	FBgn0030685	Graf
30685	340305	1	1	415	7	1	0.000947641	chrX	5;5	15760171	15760177	FBtr0340305	FBgn0030685	Graf
30685	340305	1	1	1281	7	0.651555	0.0769336	chrX	C;C	15755537	15755543	FBtr0340305	FBgn0030685	Graf
30685	345133	1	1	906	7	0.651555	0.0769336	chrX	C;C	15755537	15755543	FBtr0345133	FBgn0030685	Graf
30685	340306	1	1	996	7	0.651555	0.0769336	chrX	C;C	15755537	15755543	FBtr0340306	FBgn0030685	Graf
3892	89427	1	1	3908	7	0.534039	0.00810448	chr2R	C;C	8663611	8663617	FBtr0089427	FBgn0003892	ptc
285963	472696	1	1	3647	7	0.651555	0.056758	chr3R	C;C	26943618	26943624	FBtr0472696	FBgn0285963	CG46339
285963	472700	1	1	3551	7	0.651555	0.056758	chr3R	C;C	26943618	26943624	FBtr0472700	FBgn0285963	CG46339
285963	472695	1	1	3314	7	0.651555	0.056758	chr3R	C;C	26943618	26943624	FBtr0472695	FBgn0285963	CG46339
285963	472699	1	1	3218	7	0.651555	0.056758	chr3R	C;C	26943618	26943624	FBtr0472699	FBgn0285963	CG46339
285963	472697	1	1	3350	7	0.651555	0.056758	chr3R	C;C	26943618	26943624	FBtr0472697	FBgn0285963	CG46339
285963	472698	1	1	3683	7	0.651555	0.056758	chr3R	C;C	26943618	26943624	FBtr0472698	FBgn0285963	CG46339
51546	78737	1	1	230	7	0.651555	0.0791707	chr3R	C;C	5635388	5635394	FBtr0078737	FBgn0051546	CG31546
29728	332313	1	1	1282	7	1	0.0242361	chrX	C;C	4802552	4802558	FBtr0332313	FBgn0029728	CG2861
29728	70731	1	1	1282	7	1	0.0242361	chrX	C;C	4802552	4802558	FBtr0070731	FBgn0029728	CG2861
29728	332312	1	1	1282	7	1	0.0242361	chrX	C;C	4802552	4802558	FBtr0332312	FBgn0029728	CG2861
29728	302037	1	1	1151	7	1	0.0242361	chrX	C;C	4802552	4802558	FBtr0302037	FBgn0029728	CG2861
27529	301207	1	1	1521	7	1	0.0779282	chr2R	C;C	20322813	20322819	FBtr0301207	FBgn0027529	tapas
27529	86280	1	1	1521	7	1	0.0779282	chr2R	C;C	20322813	20322819	FBtr0086280	FBgn0027529	tapas
27529	86281	1	1	1328	7	1	0.0779282	chr2R	C;C	20322813	20322819	FBtr0086281	FBgn0027529	tapas
27529	309253	1	1	1269	7	1	0.0779282	chr2R	C;C	20322813	20322819	FBtr0309253	FBgn0027529	tapas
264962	339985	1	1	1176	7	1	0.00377607	chr2R	C;C	14868077	14868083	FBtr0339985	FBgn0264962	Pcf11
264962	339986	1	1	1176	7	1	0.00377607	chr2R	C;C	14868077	14868083	FBtr0339986	FBgn0264962	Pcf11
264962	302294	1	1	1176	7	1	0.00377607	chr2R	C;C	14868077	14868083	FBtr0302294	FBgn0264962	Pcf11
264962	301513	1	1	1176	7	1	0.00377607	chr2R	C;C	14868077	14868083	FBtr0301513	FBgn0264962	Pcf11
264962	302560	1	1	1176	7	1	0.00377607	chr2R	C;C	14868077	14868083	FBtr0302560	FBgn0264962	Pcf11
264962	345528	1	1	1176	7	1	0.00377607	chr2R	C;C	14868077	14868083	FBtr0345528	FBgn0264962	Pcf11
31119	77312	1	1	1712	7	0.534039	0.0182532	chrX	C;C	20514149	20514155	FBtr0077312	FBgn0031119	CG1812
15400	80252	1	1	5111	7	0.651555	0.0132893	chr2L	3;3	11625056	11625062	FBtr0080252	FBgn0015400	kek2
4583	78059	1	1	933	7	0.534039	0.117362	chr2L	5;C	438422	438428	FBtr0078059	FBgn0004583	ex
4583	329832	1	1	715	7	0.534039	0.117301	chr2L	5;C	438422	438428	FBtr0329832	FBgn0004583	ex
31939	79505	1	1	419	7	1	0.110889	chr2L	C;C	7730519	7730525	FBtr0079505	FBgn0031939	CG13796
31939	79503	1	1	532	7	1	0.110889	chr2L	C;C	7730519	7730525	FBtr0079503	FBgn0031939	CG13796
31939	79504	1	1	516	7	1	0.110889	chr2L	C;C	7730519	7730525	FBtr0079504	FBgn0031939	CG13796
31939	114496	1	1	478	7	1	0.110889	chr2L	C;C	7730519	7730525	FBtr0114496	FBgn0031939	CG13796
51523	345142	1	1	694	7	1	0.0043183	chr3R	C;C	4467880	4467886	FBtr0345142	FBgn0051523	CG31523
51523	345142	1	1	1147	7	1	0.00369511	chr3R	C;C	44672944466843	44672994466843	FBtr0345142	FBgn0051523	CG31523
51523	335429	1	1	813	7	0.534039	0.0191878	chr3R	5;5	4472843	4472849	FBtr0335429	FBgn0051523	CG31523
51523	335429	1	1	1350	7	1	0.0043183	chr3R	C;C	4467880	4467886	FBtr0335429	FBgn0051523	CG31523
51523	335429	1	1	1803	7	1	0.00369511	chr3R	C;C	44672944466843	44672994466843	FBtr0335429	FBgn0051523	CG31523
51523	78936	1	1	674	7	1	0.0043183	chr3R	C;C	4467880	4467886	FBtr0078936	FBgn0051523	CG31523
51523	78936	1	1	1127	7	1	0.00369511	chr3R	C;C	44672944466843	44672994466843	FBtr0078936	FBgn0051523	CG31523
51523	335430	1	1	703	7	1	0.0043183	chr3R	C;C	4467880	4467886	FBtr0335430	FBgn0051523	CG31523
51523	335430	1	1	1156	7	1	0.00369511	chr3R	C;C	44672944466843	44672994466843	FBtr0335430	FBgn0051523	CG31523
51523	78937	1	1	1018	7	1	0.0043183	chr3R	C;C	4467880	4467886	FBtr0078937	FBgn0051523	CG31523
51523	78937	1	1	1471	7	1	0.00369511	chr3R	C;C	44672944466843	44672994466843	FBtr0078937	FBgn0051523	CG31523
51523	78935	1	1	745	7	1	0.0043183	chr3R	C;C	4467880	4467886	FBtr0078935	FBgn0051523	CG31523
51523	78935	1	1	1198	7	1	0.00369511	chr3R	C;C	44672944466843	44672994466843	FBtr0078935	FBgn0051523	CG31523
51523	78938	1	1	562	7	1	0.0043183	chr3R	C;C	4467880	4467886	FBtr0078938	FBgn0051523	CG31523
51523	78938	1	1	1015	7	1	0.00369511	chr3R	C;C	44672944466843	44672994466843	FBtr0078938	FBgn0051523	CG31523
34416	86574	1	1	144	7	0.534039	0.126307	chr2R	5;5	19059674	19059680	FBtr0086574	FBgn0034416	CG15109
262005	303831	1	1	208	7	0.651555	0.0367601	chr3R	C;C	17404895	17404901	FBtr0303831	FBgn0262005	CG42823
30892	89576	1	1	933	7	0.534039	0.0113055	chrX	C;C	18089433	18089439	FBtr0089576	FBgn0030892	CG7206
30892	308352	1	1	991	7	0.534039	0.0113055	chrX	3;3	18089433	18089439	FBtr0308352	FBgn0030892	CG7206
264699	333915	1	1	1949	7	0.651555	0.00634723	chr3L	C;C	23786252	23786258	FBtr0333915	FBgn0264699	CG43968
264699	333915	1	1	2087	7	0.651555	0.0774693	chr3L	C;C	23786390	23786396	FBtr0333915	FBgn0264699	CG43968
32848	81335	1	1	1602	7	1	0.00444256	chr2L	C;C	20095659	20095665	FBtr0081335	FBgn0032848	nesd
32848	81334	1	1	1479	7	1	0.00444256	chr2L	C;C	20095659	20095665	FBtr0081334	FBgn0032848	nesd
50048	332424	1	1	3388	7	0.651555	0.0811946	chr2R	C;C	12398403	12398409	FBtr0332424	FBgn0050048	CG30048
50048	332425	1	1	3388	7	0.651555	0.0811946	chr2R	C;C	12398403	12398409	FBtr0332425	FBgn0050048	CG30048
284250	302927	1	1	3589	7	1	0.0320968	chr2R	C;C	14464474	14464480	FBtr0302927	FBgn0284250	Oaz
284250	302926	1	1	3209	7	1	0.0320968	chr2R	C;C	14464474	14464480	FBtr0302926	FBgn0284250	Oaz
22786	71070	1	1	1964	7	0.534039	0.00201111	chrX	C;C	7724183	7724189	FBtr0071070	FBgn0022786	Hira
22786	71070	1	1	2360	7	0.534039	0.0325892	chrX	C;C	7724723	7724729	FBtr0071070	FBgn0022786	Hira
22786	71070	1	1	2591	7	0.534039	0.139905	chrX	C;C	7725021	7725027	FBtr0071070	FBgn0022786	Hira
28717	84935	1	1	1559	7	1	0.0683698	chr3R	C;C	25891129	25891135	FBtr0084935	FBgn0028717	Lnk
28717	339160	1	1	1400	7	1	0.0683698	chr3R	C;C	25891129	25891135	FBtr0339160	FBgn0028717	Lnk
28717	339161	1	1	1400	7	1	0.0683698	chr3R	C;C	25891129	25891135	FBtr0339161	FBgn0028717	Lnk
28717	339162	1	1	1190	7	1	0.0683698	chr3R	C;C	25891129	25891135	FBtr0339162	FBgn0028717	Lnk
28717	84937	1	1	1385	7	1	0.0683698	chr3R	C;C	25891129	25891135	FBtr0084937	FBgn0028717	Lnk
28717	84936	1	1	1190	7	1	0.0683698	chr3R	C;C	25891129	25891135	FBtr0084936	FBgn0028717	Lnk
36463	333876	1	1	807	7	0.534039	0.00853119	chr3L	C;C	15007941	15007947	FBtr0333876	FBgn0036463	Reck
36463	333876	1	1	2453	7	1	0.0706919	chr3L	C;C	15003116	15003122	FBtr0333876	FBgn0036463	Reck
36463	333876	1	1	2815	7	0.534039	0.00637977	chr3L	C;C	15002754	15002760	FBtr0333876	FBgn0036463	Reck
36463	75671	1	1	839	7	0.534039	0.00853119	chr3L	C;C	15007941	15007947	FBtr0075671	FBgn0036463	Reck
36463	75671	1	1	2485	7	1	0.0706919	chr3L	C;C	15003116	15003122	FBtr0075671	FBgn0036463	Reck
36463	75671	1	1	2847	7	0.534039	0.00637977	chr3L	C;C	15002754	15002760	FBtr0075671	FBgn0036463	Reck
259234	339382	1	1	4557	7	0.534039	0.0325998	chr2R	C;C	9474346	9474352	FBtr0339382	FBgn0259234	Camta
259234	339382	1	1	4857	7	0.534039	0.00401829	chr2R	C;C	9474646	9474652	FBtr0339382	FBgn0259234	Camta
259234	299847	1	1	3839	7	0.534039	0.0325998	chr2R	C;C	9474346	9474352	FBtr0299847	FBgn0259234	Camta
259234	299847	1	1	4139	7	0.534039	0.00401829	chr2R	C;C	9474646	9474652	FBtr0299847	FBgn0259234	Camta
259234	300527	1	1	4560	7	0.534039	0.0325998	chr2R	C;C	9474346	9474352	FBtr0300527	FBgn0259234	Camta
259234	300527	1	1	4860	7	0.534039	0.00401829	chr2R	C;C	9474646	9474652	FBtr0300527	FBgn0259234	Camta
259234	301766	1	1	4557	7	0.534039	0.0325998	chr2R	C;C	9474346	9474352	FBtr0301766	FBgn0259234	Camta
259234	301766	1	1	4857	7	0.534039	0.00401829	chr2R	C;C	9474646	9474652	FBtr0301766	FBgn0259234	Camta
259234	299846	1	1	3839	7	0.534039	0.0325998	chr2R	C;C	9474346	9474352	FBtr0299846	FBgn0259234	Camta
259234	299846	1	1	4139	7	0.534039	0.00401829	chr2R	C;C	9474646	9474652	FBtr0299846	FBgn0259234	Camta
259234	339381	1	1	3168	7	0.534039	0.0325998	chr2R	C;C	9474346	9474352	FBtr0339381	FBgn0259234	Camta
259234	339381	1	1	3468	7	0.534039	0.00401829	chr2R	C;C	9474646	9474652	FBtr0339381	FBgn0259234	Camta
259234	299845	1	1	4560	7	0.534039	0.0325998	chr2R	C;C	9474346	9474352	FBtr0299845	FBgn0259234	Camta
259234	299845	1	1	4860	7	0.534039	0.00401829	chr2R	C;C	9474646	9474652	FBtr0299845	FBgn0259234	Camta
31918	330720	1	1	249	7	0.534039	0.0161022	chr2L	C;C	7471709	7471715	FBtr0330720	FBgn0031918	CG6055
31918	79449	1	1	302	7	0.534039	0.0161022	chr2L	C;C	7471709	7471715	FBtr0079449	FBgn0031918	CG6055
53874	91878	1	1	362	7	0.534039	0.0633356	chr2L	C;C	21523001	21523007	FBtr0091878	FBgn0053874	His2B:CG33874
39186	334603	1	1	3214	7	0.534039	0.0314372	chr3R	3;3	24345172	24345178	FBtr0334603	FBgn0039186	CG5746
23534	340145	1	1	668	7	0.534039	0.027561	chrX	C;C	495694	495700	FBtr0340145	FBgn0023534	CG17778
23534	70080	1	1	443	7	0.534039	0.027561	chrX	C;C	495694	495700	FBtr0070080	FBgn0023534	CG17778
36660	333610	1	1	1927	7	0.651555	0.0110171	chr3L	C;C	16777742	16777748	FBtr0333610	FBgn0036660	CG13025
36660	75346	1	1	1927	7	0.651555	0.0110171	chr3L	C;C	16777742	16777748	FBtr0075346	FBgn0036660	CG13025
31359	305618	1	1	1832	7	1	0.0149719	chr2L	3;3	1716801	1716807	FBtr0305618	FBgn0031359	Rim2
31359	306167	1	1	1788	7	1	0.0149719	chr2L	3;3	1716801	1716807	FBtr0306167	FBgn0031359	Rim2
45486	80963	1	1	229	7	0.651555	0.0621688	chr2L	C;C	17179001	17179007	FBtr0080963	FBgn0045486	Gr36b
263510	88228	1	1	1337	7	1	0.0169016	chr2R	C;C	10877085	10877091	FBtr0088228	FBgn0263510	nclb
265988	304060	1	1	3583	7	0.534039	0.0227431	chr3L	C;C	1958693	1958699	FBtr0304060	FBgn0265988	mv
265988	304060	1	1	5490	7	1	0.0042404	chr3L	C;C	1956674	1956680	FBtr0304060	FBgn0265988	mv
53900	91904	1	1	362	7	0.534039	0.0633356	chr2L	C;C	21457498	21457504	FBtr0091904	FBgn0053900	His2B:CG33900
40371	70069	1	1	897	7	1	0.0542601	chrX	C;C	308778	308784	FBtr0070069	FBgn0040371	CG12470
53696	91684	1	1	1537	7	0.534039	0.135302	chr3L	C;C	9650996	9651002	FBtr0091684	FBgn0053696	CNMaR
10379	83228	1	1	2692	7	0.534039	0.0737392	chr3R	3;3	16103559	16103565	FBtr0083228	FBgn0010379	Akt1
10379	344470	1	1	2344	7	0.534039	0.0737392	chr3R	3;3	16103559	16103565	FBtr0344470	FBgn0010379	Akt1
10379	83226	1	1	2692	7	0.534039	0.0737392	chr3R	3;3	16103559	16103565	FBtr0083226	FBgn0010379	Akt1
10379	83227	1	1	2757	7	0.534039	0.0737392	chr3R	3;3	16103559	16103565	FBtr0083227	FBgn0010379	Akt1
10379	344717	1	1	2757	7	0.534039	0.0737392	chr3R	3;3	16103559	16103565	FBtr0344717	FBgn0010379	Akt1
27578	336460	1	1	252	7	0.534039	0.0569789	chr3R	C;C	28883945	28883951	FBtr0336460	FBgn0027578	CG14526
264502	332933	1	1	5433	7	0.534039	0.0169241	chrX	C;C	10917445	10917451	FBtr0332933	FBgn0264502	CG43901
264502	332933	1	1	5853	7	0.534039	0.00571352	chrX	C;C	10917865	10917871	FBtr0332933	FBgn0264502	CG43901
264502	332932	1	1	5628	7	0.534039	0.0169241	chrX	C;C	10917445	10917451	FBtr0332932	FBgn0264502	CG43901
264502	332932	1	1	6048	7	0.534039	0.00571352	chrX	C;C	10917865	10917871	FBtr0332932	FBgn0264502	CG43901
264502	332932	1	1	9054	7	1	0.000692435	chrX	3;3	10922188	10922194	FBtr0332932	FBgn0264502	CG43901
264502	344828	1	1	5430	7	0.534039	0.0169241	chrX	C;C	10917445	10917451	FBtr0344828	FBgn0264502	CG43901
264502	344828	1	1	5850	7	0.534039	0.00571352	chrX	C;C	10917865	10917871	FBtr0344828	FBgn0264502	CG43901
38143	82766	1	1	221	7	0.651555	0.0516034	chr3R	C;C	13379039	13379045	FBtr0082766	FBgn0038143	CG9813
38143	335460	1	1	151	7	0.651555	0.0516034	chr3R	C;C	13379039	13379045	FBtr0335460	FBgn0038143	CG9813
38143	82767	1	1	151	7	0.651555	0.0516034	chr3R	C;C	13379039	13379045	FBtr0082767	FBgn0038143	CG9813
38143	82769	1	1	156	7	0.651555	0.0516034	chr3R	C;C	13379039	13379045	FBtr0082769	FBgn0038143	CG9813
38143	82765	1	1	407	7	0.651555	0.0516034	chr3R	C;C	13379039	13379045	FBtr0082765	FBgn0038143	CG9813
38143	82768	1	1	151	7	0.651555	0.0516034	chr3R	C;C	13379039	13379045	FBtr0082768	FBgn0038143	CG9813
38143	82770	1	1	156	7	0.651555	0.0516034	chr3R	C;C	13379039	13379045	FBtr0082770	FBgn0038143	CG9813
32138	79848	1	1	348	7	0.651555	0.0220758	chr2L	C;C	9710813	9710819	FBtr0079848	FBgn0032138	CG4364
43364	78084	1	1	911	7	1	0.00261227	chr2L	5;5	478771	478777	FBtr0078084	FBgn0043364	cbt
266173	343752	1	1	124	7	0.534039	0.00310254	chr3R	5;5	21359638	21359644	FBtr0343752	FBgn0266173	pre-mod(mdg4)-K
266173	343752	1	1	1079	7	1	0.107116	chr3R	3;3	21358683	21358689	FBtr0343752	FBgn0266173	pre-mod(mdg4)-K
266173	433526	1	1	124	7	0.534039	0.00310254	chr3R	5;5	21359638	21359644	FBtr0433526	FBgn0266173	pre-mod(mdg4)-K
266173	433526	1	1	1079	7	1	0.107116	chr3R	3;3	21358683	21358689	FBtr0433526	FBgn0266173	pre-mod(mdg4)-K
36567	75496	1	1	71	7	0.534039	0.0411989	chr3L	C;C	16097416	16097422	FBtr0075496	FBgn0036567	CG13074
36567	75496	1	1	1408	7	0.651555	0.00446678	chr3L	3;3	16095886	16095892	FBtr0075496	FBgn0036567	CG13074
33215	88928	1	1	36	7	0.651555	0.0413193	chr2R	5;5	7712614	7712620	FBtr0088928	FBgn0033215	CG1942
11705	331454	1	1	1221	7	1	0.0806796	chr2L	3;3	8986191	8986197	FBtr0331454	FBgn0011705	rost
11705	331453	1	1	1351	7	1	0.0806796	chr2L	3;3	8986191	8986197	FBtr0331453	FBgn0011705	rost
11705	79782	1	1	1116	7	1	0.0806796	chr2L	3;3	8986191	8986197	FBtr0079782	FBgn0011705	rost
52365	76746	1	1	1029	7	1	0.0315724	chr3L	C;C	7893494	7893500	FBtr0076746	FBgn0052365	CG32365
52365	339897	1	1	1508	7	1	0.0315724	chr3L	C;C	7893494	7893500	FBtr0339897	FBgn0052365	CG32365
53288	301013	1	1	2937	7	1	0.00114748	chr3L	C;C	21432253	21432259	FBtr0301013	FBgn0053288	CG33288
34543	342718	1	1	1299	7	0.651555	0.0105102	chr2R	3;3	20672900	20672906	FBtr0342718	FBgn0034543	galla-1
261261	334947	1	1	3662	7	0.534039	0.0508119	chr3R	C;C	5710061	5710067	FBtr0334947	FBgn0261261	plx
261261	302091	1	1	3572	7	0.534039	0.0508119	chr3R	C;C	5710061	5710067	FBtr0302091	FBgn0261261	plx
261261	302092	1	1	2719	7	0.534039	0.0508119	chr3R	C;C	5710061	5710067	FBtr0302092	FBgn0261261	plx
261261	302090	1	1	2812	7	0.534039	0.0508119	chr3R	C;C	5710061	5710067	FBtr0302090	FBgn0261261	plx
261261	334948	1	1	2557	7	0.534039	0.0508119	chr3R	C;C	5710061	5710067	FBtr0334948	FBgn0261261	plx
50343	308205	1	1	846	7	1	0.0506356	chr2R	3;3	9253038	9253044	FBtr0308205	FBgn0050343	CG30343
50343	88594	1	1	1017	7	1	0.0506356	chr2R	3;3	9253038	9253044	FBtr0088594	FBgn0050343	CG30343
44051	76328	1	1	512	7	0.534039	0.287358	chr3L	3;3	9798932	9798938	FBtr0076328	FBgn0044051	Ilp1
37710	82113	1	1	464	7	1	0.266732	chr3R	C;C	9563010	9563016	FBtr0082113	FBgn0037710	CG9393
37710	332808	1	1	464	7	1	0.266732	chr3R	C;C	9563010	9563016	FBtr0332808	FBgn0037710	CG9393
27084	71366	1	1	477	7	1	0.00579161	chrX	C;C	9607975	9607981	FBtr0071366	FBgn0027084	LysRS
27084	71367	1	1	731	7	1	0.00579161	chrX	C;C	9607975	9607981	FBtr0071367	FBgn0027084	LysRS
27084	303560	1	1	668	7	1	0.00579161	chrX	C;C	9607975	9607981	FBtr0303560	FBgn0027084	LysRS
26575	290069	1	1	3173	7	0.651555	0.195598	chrX	C;C	16432018	16432024	FBtr0290069	FBgn0026575	hang
26575	290069	1	1	5541	7	1	0.000107804	chrX	C;C	16435233	16435239	FBtr0290069	FBgn0026575	hang
26575	343571	1	1	2381	7	0.651555	0.195598	chrX	C;C	16432018	16432024	FBtr0343571	FBgn0026575	hang
26575	343571	1	1	4749	7	1	0.000107804	chrX	C;C	16435233	16435239	FBtr0343571	FBgn0026575	hang
26575	74276	1	1	2381	7	0.651555	0.195598	chrX	C;C	16432018	16432024	FBtr0074276	FBgn0026575	hang
26575	74276	1	1	4737	7	1	0.000107804	chrX	C;C	16435233	16435239	FBtr0074276	FBgn0026575	hang
36549	75512	1	1	163	7	0.534039	0.00352509	chr3L	5;C	15968367	15968373	FBtr0075512	FBgn0036549	CG10516
284408	342811	1	1	2333	7	0.651555	0.0313569	chrX	C;C	2490783	2490789	FBtr0342811	FBgn0284408	trol
284408	342808	1	1	4382	7	0.651555	0.0313569	chrX	C;C	2490783	2490789	FBtr0342808	FBgn0284408	trol
284408	342826	1	1	3758	7	0.651555	0.0313569	chrX	C;C	2490783	2490789	FBtr0342826	FBgn0284408	trol
284408	342814	1	1	2810	7	0.651555	0.0313569	chrX	C;C	2490783	2490789	FBtr0342814	FBgn0284408	trol
284408	342821	1	1	2882	7	0.651555	0.0313569	chrX	C;C	2490783	2490789	FBtr0342821	FBgn0284408	trol
284408	342825	1	1	3116	7	0.651555	0.0313569	chrX	C;C	2490783	2490789	FBtr0342825	FBgn0284408	trol
284408	342813	1	1	3599	7	0.651555	0.0313569	chrX	C;C	2490783	2490789	FBtr0342813	FBgn0284408	trol
284408	342812	1	1	3050	7	0.651555	0.0313569	chrX	C;C	2490783	2490789	FBtr0342812	FBgn0284408	trol
284408	342815	1	1	2567	7	0.651555	0.0313569	chrX	C;C	2490783	2490789	FBtr0342815	FBgn0284408	trol
284408	342810	1	1	3515	7	0.651555	0.0313569	chrX	C;C	2490783	2490789	FBtr0342810	FBgn0284408	trol
284408	342820	1	1	4502	7	0.651555	0.0313569	chrX	C;C	2490783	2490789	FBtr0342820	FBgn0284408	trol
284408	342816	1	1	4046	7	0.651555	0.0313569	chrX	C;C	2490783	2490789	FBtr0342816	FBgn0284408	trol
284408	342819	1	1	4502	7	0.651555	0.0313569	chrX	C;C	2490783	2490789	FBtr0342819	FBgn0284408	trol
284408	342807	1	1	3170	7	0.651555	0.0313569	chrX	C;C	2490783	2490789	FBtr0342807	FBgn0284408	trol
284408	342807	1	1	10294	7	1	0.0490225	chrX	3;3	2479910	2479916	FBtr0342807	FBgn0284408	trol
284408	342817	1	1	3599	7	0.651555	0.0313569	chrX	C;C	2490783	2490789	FBtr0342817	FBgn0284408	trol
284408	342809	1	1	2423	7	0.651555	0.061552	chrX	C;C	2490783	2490789	FBtr0342809	FBgn0284408	trol
284408	342806	1	1	4265	7	0.651555	0.0313569	chrX	C;C	2490783	2490789	FBtr0342806	FBgn0284408	trol
284408	342824	1	1	2648	7	0.651555	0.0313569	chrX	C;C	2490783	2490789	FBtr0342824	FBgn0284408	trol
284408	342805	1	1	3858	7	0.651555	0.061552	chrX	C;C	2490783	2490789	FBtr0342805	FBgn0284408	trol
284408	342818	1	1	2564	7	0.651555	0.0313569	chrX	C;C	2490783	2490789	FBtr0342818	FBgn0284408	trol
284408	342823	1	1	2414	7	0.651555	0.0313569	chrX	C;C	2490783	2490789	FBtr0342823	FBgn0284408	trol
284408	342823	1	1	9538	7	1	0.0490225	chrX	3;3	2479910	2479916	FBtr0342823	FBgn0284408	trol
284408	342823	1	1	12458	7	1	0.0333408	chrX	3;3	2476990	2476996	FBtr0342823	FBgn0284408	trol
284408	342822	1	1	3170	7	0.651555	0.0313569	chrX	C;C	2490783	2490789	FBtr0342822	FBgn0284408	trol
30613	307207	1	1	1373	7	0.651555	0.00731504	chrX	C;C	15094689	15094695	FBtr0307207	FBgn0030613	Rab3-GEF
30613	307207	1	1	2597	7	0.651555	0.117922	chrX	C;C	15098290	15098296	FBtr0307207	FBgn0030613	Rab3-GEF
30613	452148	1	1	1373	7	0.651555	0.00731504	chrX	C;C	15094689	15094695	FBtr0452148	FBgn0030613	Rab3-GEF
30613	452148	1	1	2630	7	0.651555	0.117922	chrX	C;C	15098290	15098296	FBtr0452148	FBgn0030613	Rab3-GEF
30613	452148	1	1	3308	7	0.534039	0.0128872	chrX	C;C	1509903615099240	1509903715099250	FBtr0452148	FBgn0030613	Rab3-GEF
30613	307209	1	1	1397	7	0.651555	0.00731504	chrX	C;C	15094689	15094695	FBtr0307209	FBgn0030613	Rab3-GEF
30613	307209	1	1	2621	7	0.651555	0.117922	chrX	C;C	15098290	15098296	FBtr0307209	FBgn0030613	Rab3-GEF
30613	307210	1	1	1373	7	0.651555	0.00731504	chrX	C;C	15094689	15094695	FBtr0307210	FBgn0030613	Rab3-GEF
30613	307210	1	1	2597	7	0.651555	0.117922	chrX	C;C	15098290	15098296	FBtr0307210	FBgn0030613	Rab3-GEF
30613	346798	1	1	1373	7	0.651555	0.00731504	chrX	C;C	15094689	15094695	FBtr0346798	FBgn0030613	Rab3-GEF
30613	346798	1	1	2630	7	0.651555	0.117922	chrX	C;C	15098290	15098296	FBtr0346798	FBgn0030613	Rab3-GEF
30613	330401	1	1	1373	7	0.651555	0.00731504	chrX	C;C	15094689	15094695	FBtr0330401	FBgn0030613	Rab3-GEF
30613	330401	1	1	2630	7	0.651555	0.117922	chrX	C;C	15098290	15098296	FBtr0330401	FBgn0030613	Rab3-GEF
30613	452146	1	1	1373	7	0.651555	0.00731504	chrX	C;C	15094689	15094695	FBtr0452146	FBgn0030613	Rab3-GEF
30613	452146	1	1	2630	7	0.651555	0.117922	chrX	C;C	15098290	15098296	FBtr0452146	FBgn0030613	Rab3-GEF
30613	452146	1	1	3308	7	0.534039	0.0128872	chrX	C;C	1509903615099240	1509903715099250	FBtr0452146	FBgn0030613	Rab3-GEF
30613	452147	1	1	1373	7	0.651555	0.00731504	chrX	C;C	15094689	15094695	FBtr0452147	FBgn0030613	Rab3-GEF
30613	452147	1	1	2630	7	0.651555	0.117922	chrX	C;C	15098290	15098296	FBtr0452147	FBgn0030613	Rab3-GEF
30613	452147	1	1	3308	7	0.534039	0.0128872	chrX	C;C	1509903615099240	1509903715099250	FBtr0452147	FBgn0030613	Rab3-GEF
30613	307208	1	1	1364	7	0.651555	0.00731504	chrX	C;C	15094689	15094695	FBtr0307208	FBgn0030613	Rab3-GEF
30613	307208	1	1	2588	7	0.651555	0.117922	chrX	C;C	15098290	15098296	FBtr0307208	FBgn0030613	Rab3-GEF
30613	307208	1	1	3266	7	0.534039	0.0128872	chrX	C;C	1509903615099240	1509903715099250	FBtr0307208	FBgn0030613	Rab3-GEF
30613	330400	1	1	1373	7	0.651555	0.00731504	chrX	C;C	15094689	15094695	FBtr0330400	FBgn0030613	Rab3-GEF
30613	330400	1	1	2597	7	0.651555	0.117922	chrX	C;C	15098290	15098296	FBtr0330400	FBgn0030613	Rab3-GEF
38897	84125	1	1	1331	7	1	0.00207804	chr3R	C;C	21742586	21742592	FBtr0084125	FBgn0038897	CG5849
38897	301164	1	1	1331	7	1	0.00207804	chr3R	C;C	21742586	21742592	FBtr0301164	FBgn0038897	CG5849
34435	86518	1	1	941	7	1	0.196343	chr2R	C;C	1934294619343010	1934295119343010	FBtr0086518	FBgn0034435	fest
34435	86518	1	1	2606	7	0.651555	0.247672	chr2R	3;3	19345116	19345122	FBtr0086518	FBgn0034435	fest
259173	299641	1	1	4354	7	1	0.00345022	chr3L	C;C	7143894	7143900	FBtr0299641	FBgn0259173	corn
259173	333375	1	1	4473	7	1	0.00345022	chr3L	3;3	7143894	7143900	FBtr0333375	FBgn0259173	corn
259173	333374	1	1	4336	7	1	0.00345022	chr3L	C;C	7143894	7143900	FBtr0333374	FBgn0259173	corn
51019	85665	1	1	1099	7	1	0.00127834	chr3R	C;C	30598355	30598361	FBtr0085665	FBgn0051019	CG31019
51019	85665	1	1	1113	7	0.534039	0.00194561	chr3R	C;C	30598369	30598375	FBtr0085665	FBgn0051019	CG31019
51019	85665	1	1	1263	7	0.534039	0.00365009	chr3R	C;C	30598519	30598525	FBtr0085665	FBgn0051019	CG31019
51019	335439	1	1	1030	7	1	0.00142011	chr3R	C;C	30598355	30598361	FBtr0335439	FBgn0051019	CG31019
51019	335439	1	1	1044	7	0.534039	0.00194484	chr3R	C;C	30598369	30598375	FBtr0335439	FBgn0051019	CG31019
51019	335439	1	1	1194	7	0.534039	0.00365009	chr3R	C;C	30598519	30598525	FBtr0335439	FBgn0051019	CG31019
31181	77213	1	1	402	7	0.534039	0.00461144	chrX	C;C	21478537	21478543	FBtr0077213	FBgn0031181	Ir20a
261549	333602	1	1	8721	7	0.651555	0.0168067	chrX	3;3	9028051	9028057	FBtr0333602	FBgn0261549	rdgA
37406	78588	1	1	702	7	0.534039	2.93254e-05	chr3R	C;C	6174513	6174519	FBtr0078588	FBgn0037406	Osi1
50280	300929	1	1	501	7	0.534039	0.0164187	chr2R	C;C	22114206	22114212	FBtr0300929	FBgn0050280	CG30280
50280	300928	1	1	501	7	0.534039	0.0164187	chr2R	C;C	22114206	22114212	FBtr0300928	FBgn0050280	CG30280
4880	73165	1	1	1973	7	1	0.00103949	chr3L	C;C	3986902	3986908	FBtr0073165	FBgn0004880	scrt
4880	333136	1	1	1973	7	1	0.00103949	chr3L	C;C	3986902	3986908	FBtr0333136	FBgn0004880	scrt
31118	345015	1	1	4664	7	0.534039	0.00594763	chrX	C;C	20474365	20474371	FBtr0345015	FBgn0031118	RhoGAP19D
31118	345015	1	1	8274	7	0.651555	0.0378202	chrX	3;3	20470478	20470484	FBtr0345015	FBgn0031118	RhoGAP19D
31118	304906	1	1	5149	7	0.534039	0.00594763	chrX	C;C	20474365	20474371	FBtr0304906	FBgn0031118	RhoGAP19D
31118	304906	1	1	8759	7	0.651555	0.0378202	chrX	3;3	20470478	20470484	FBtr0304906	FBgn0031118	RhoGAP19D
31118	340405	1	1	5149	7	0.534039	0.00594763	chrX	C;C	20474365	20474371	FBtr0340405	FBgn0031118	RhoGAP19D
31118	340405	1	1	8972	7	0.651555	0.0378202	chrX	3;3	20470478	20470484	FBtr0340405	FBgn0031118	RhoGAP19D
31118	77320	1	1	5074	7	0.534039	0.00594763	chrX	C;C	20474365	20474371	FBtr0077320	FBgn0031118	RhoGAP19D
31118	301537	1	1	5071	7	0.534039	0.00594763	chrX	C;C	20474365	20474371	FBtr0301537	FBgn0031118	RhoGAP19D
31118	301537	1	1	8681	7	0.651555	0.0378202	chrX	3;3	20470478	20470484	FBtr0301537	FBgn0031118	RhoGAP19D
36663	345074	1	1	759	7	0.534039	0.0133282	chr3L	C;C	16796260	16796266	FBtr0345074	FBgn0036663	CG9674
36663	345074	1	1	5062	7	1	0.0816724	chr3L	3;3	1679099916790940	1679100416790940	FBtr0345074	FBgn0036663	CG9674
36663	75344	1	1	869	7	0.534039	0.0133282	chr3L	C;C	16796260	16796266	FBtr0075344	FBgn0036663	CG9674
36663	75344	1	1	4422	7	1	0.0816724	chr3L	C;C	1679099916790940	1679100416790940	FBtr0075344	FBgn0036663	CG9674
36663	75341	1	1	759	7	0.534039	0.0133282	chr3L	C;C	16796260	16796266	FBtr0075341	FBgn0036663	CG9674
36663	75341	1	1	4312	7	1	0.0816724	chr3L	C;C	1679099916790940	1679100416790940	FBtr0075341	FBgn0036663	CG9674
36663	333608	1	1	759	7	0.534039	0.0133282	chr3L	C;C	16796260	16796266	FBtr0333608	FBgn0036663	CG9674
36663	333608	1	1	4315	7	1	0.0816724	chr3L	C;C	1679099916790940	1679100416790940	FBtr0333608	FBgn0036663	CG9674
36663	305915	1	1	767	7	0.534039	0.0133282	chr3L	C;C	16796260	16796266	FBtr0305915	FBgn0036663	CG9674
36663	305915	1	1	4837	7	1	0.0816724	chr3L	3;3	1679099916790940	1679100416790940	FBtr0305915	FBgn0036663	CG9674
36663	333609	1	1	759	7	0.534039	0.0133282	chr3L	C;C	16796260	16796266	FBtr0333609	FBgn0036663	CG9674
36663	333609	1	1	4829	7	1	0.0816724	chr3L	3;3	1679099916790940	1679100416790940	FBtr0333609	FBgn0036663	CG9674
36663	305916	1	1	788	7	0.534039	0.0133282	chr3L	C;C	16796260	16796266	FBtr0305916	FBgn0036663	CG9674
36663	305916	1	1	4344	7	1	0.0816724	chr3L	C;C	1679099916790940	1679100416790940	FBtr0305916	FBgn0036663	CG9674
33166	89007	1	1	1825	7	0.534039	0.0117343	chr2R	C;C	7398948	7398954	FBtr0089007	FBgn0033166	Eaf
33166	89009	1	1	1373	7	0.534039	0.0117343	chr2R	C;C	7398948	7398954	FBtr0089009	FBgn0033166	Eaf
33166	89008	1	1	2427	7	0.534039	0.0117343	chr2R	C;C	7398948	7398954	FBtr0089008	FBgn0033166	Eaf
33166	89006	1	1	2504	7	0.534039	0.0117343	chr2R	C;C	7398948	7398954	FBtr0089006	FBgn0033166	Eaf
32536	100327	1	1	1538	7	1	0.0362471	chr2L	C;C	13917031	13917037	FBtr0100327	FBgn0032536	Ance-3
32536	343641	1	1	1538	7	1	0.0362471	chr2L	C;C	13917031	13917037	FBtr0343641	FBgn0032536	Ance-3
39861	337032	1	1	690	7	0.534039	0.00863199	chr3R	C;C	31619654	31619660	FBtr0337032	FBgn0039861	pasha
39861	337032	1	1	1245	7	0.534039	0.00181269	chr3R	C;C	31620209	31620215	FBtr0337032	FBgn0039861	pasha
39861	337032	1	1	2083	7	0.651555	0.156004	chr3R	3;3	31621162	31621168	FBtr0337032	FBgn0039861	pasha
39861	85820	1	1	1141	7	0.534039	0.00863199	chr3R	C;C	31619654	31619660	FBtr0085820	FBgn0039861	pasha
39861	85820	1	1	1696	7	0.534039	0.00181269	chr3R	C;C	31620209	31620215	FBtr0085820	FBgn0039861	pasha
39861	85820	1	1	2534	7	0.651555	0.156004	chr3R	3;3	31621162	31621168	FBtr0085820	FBgn0039861	pasha
39861	337031	1	1	417	7	0.534039	0.00863199	chr3R	C;C	31619654	31619660	FBtr0337031	FBgn0039861	pasha
39861	337031	1	1	972	7	0.534039	0.00181269	chr3R	C;C	31620209	31620215	FBtr0337031	FBgn0039861	pasha
39861	337031	1	1	1810	7	0.651555	0.156004	chr3R	3;3	31621162	31621168	FBtr0337031	FBgn0039861	pasha
263597	310089	1	1	159	7	1	0.00020211	chr3R	3;3	27695042	27695048	FBtr0310089	FBgn0263597	Acp98AB
58160	333380	1	1	1633	7	0.534039	0.098166	chr3L	3;3	26226198	26226204	FBtr0333380	FBgn0058160	CG40160
58160	333380	1	1	3165	7	0.534039	0.229762	chr3L	3;3	26227730	26227736	FBtr0333380	FBgn0058160	CG40160
4400	86897	1	1	229	7	0.651555	0.0118786	chr2R	C;C	17633281	17633287	FBtr0086897	FBgn0004400	rhi
4400	86897	1	1	1030	7	0.534039	0.00620593	chr2R	C;C	1763248417632230	1763248617632230	FBtr0086897	FBgn0004400	rhi
50157	86186	1	1	81	7	0.651555	0.00173596	chr2R	5;5	6975046	6975052	FBtr0086186	FBgn0050157	CG30157
45759	76900	1	1	1959	7	0.534039	0.106944	chr3L	C;C	6993995	6994001	FBtr0076900	FBgn0045759	bin
53882	91886	1	1	362	7	0.534039	0.0633356	chr2L	C;C	21503024	21503030	FBtr0091886	FBgn0053882	His2B:CG33882
3165	81990	1	1	4745	7	0.651555	0.0106854	chr3R	C;C	9071811	9071817	FBtr0081990	FBgn0003165	pum
3165	81990	1	1	6087	7	0.651555	0.0101783	chr3R	3;3	9070324	9070330	FBtr0081990	FBgn0003165	pum
3165	81991	1	1	4743	7	0.651555	0.0106854	chr3R	C;C	9071811	9071817	FBtr0081991	FBgn0003165	pum
3165	81991	1	1	6085	7	0.651555	0.0101783	chr3R	3;3	9070324	9070330	FBtr0081991	FBgn0003165	pum
3165	81993	1	1	3378	7	0.651555	0.0106854	chr3R	C;C	9071811	9071817	FBtr0081993	FBgn0003165	pum
3165	81993	1	1	4720	7	0.651555	0.0101783	chr3R	3;3	9070324	9070330	FBtr0081993	FBgn0003165	pum
3165	305197	1	1	2739	7	0.651555	0.0106854	chr3R	C;C	9071811	9071817	FBtr0305197	FBgn0003165	pum
3165	305197	1	1	4081	7	0.651555	0.0101783	chr3R	3;3	9070324	9070330	FBtr0305197	FBgn0003165	pum
3165	81994	1	1	2769	7	0.651555	0.0106854	chr3R	C;C	9071811	9071817	FBtr0081994	FBgn0003165	pum
3165	81994	1	1	4111	7	0.651555	0.0101783	chr3R	3;3	9070324	9070330	FBtr0081994	FBgn0003165	pum
3165	333668	1	1	2727	7	0.651555	0.0106854	chr3R	C;C	9071811	9071817	FBtr0333668	FBgn0003165	pum
3165	333668	1	1	4069	7	0.651555	0.0101783	chr3R	3;3	9070324	9070330	FBtr0333668	FBgn0003165	pum
3165	81992	1	1	4893	7	0.651555	0.0106854	chr3R	C;C	9071811	9071817	FBtr0081992	FBgn0003165	pum
3165	81992	1	1	6235	7	0.651555	0.0101783	chr3R	3;3	9070324	9070330	FBtr0081992	FBgn0003165	pum
3165	333667	1	1	4893	7	0.651555	0.0106854	chr3R	C;C	9071811	9071817	FBtr0333667	FBgn0003165	pum
3165	333667	1	1	6235	7	0.651555	0.0101783	chr3R	3;3	9070324	9070330	FBtr0333667	FBgn0003165	pum
29870	343373	1	1	3130	7	0.651555	0.0197308	chrX	3;3	6370438	6370444	FBtr0343373	FBgn0029870	Marf
29870	70909	1	1	2957	7	0.651555	0.0197308	chrX	3;3	6370438	6370444	FBtr0070909	FBgn0029870	Marf
29870	70910	1	1	3118	7	0.651555	0.0197308	chrX	3;3	6370438	6370444	FBtr0070910	FBgn0029870	Marf
152	74372	1	1	824	7	0.534039	0.08951	chrX	C;C	16682371	16682377	FBtr0074372	FBgn0000152	Axs
262030	303925	1	1	123	7	0.534039	0.272489	chr3L	C;C	2005522	2005528	FBtr0303925	FBgn0262030	CG42841
262030	333432	1	1	123	7	0.534039	0.272489	chr3L	C;C	2005522	2005528	FBtr0333432	FBgn0262030	CG42841
262030	333432	1	1	947	7	0.651555	0.135406	chr3L	3;3	2003242	2003248	FBtr0333432	FBgn0262030	CG42841
35724	76937	1	1	1986	7	0.651555	0.059687	chr3L	C;C	6965646	6965652	FBtr0076937	FBgn0035724	CG10064
250850	86252	1	1	1112	7	0.651555	0.00362695	chr2R	C;C	20639563	20639569	FBtr0086252	FBgn0250850	rig
11785	84604	1	1	1339	7	0.651555	0.187802	chr3R	C;C	24321761	24321767	FBtr0084604	FBgn0011785	BRWD3
11785	84604	1	1	3481	7	0.651555	0.0292062	chr3R	C;C	24324104	24324110	FBtr0084604	FBgn0011785	BRWD3
27330	344164	1	1	1106	7	0.534039	0.00560589	chrX	C;C	8719046	8719052	FBtr0344164	FBgn0027330	l(1)G0020
27330	71280	1	1	1106	7	0.534039	0.00560589	chrX	C;C	8719046	8719052	FBtr0071280	FBgn0027330	l(1)G0020
30510	73846	1	1	378	7	1	0.0194137	chrX	C;C	13680014	13680020	FBtr0073846	FBgn0030510	CG12177
30510	346119	1	1	480	7	1	0.0194137	chrX	C;C	13680014	13680020	FBtr0346119	FBgn0030510	CG12177
30510	340399	1	1	181	7	1	0.0194137	chrX	C;C	13680014	13680020	FBtr0340399	FBgn0030510	CG12177
4066	74210	1	1	340	7	1	0.00265448	chrX	C;C	16276687	16276693	FBtr0074210	FBgn0004066	Prosalpha4
32296	80119	1	1	1064	7	0.534039	0.00194379	chr2L	C;C	10742814	10742820	FBtr0080119	FBgn0032296	CG6729
37252	78926	1	1	3059	7	0.651555	0.0350173	chr3R	C;C	4440758	4440764	FBtr0078926	FBgn0037252	CG14650
51217	83353	1	1	1176	7	0.651555	0.0787396	chr3R	C;C	16653661	16653667	FBtr0083353	FBgn0051217	modSP
36780	332861	1	1	1111	7	0.534039	0.0767335	chr3L	3;3	18153753	18153759	FBtr0332861	FBgn0036780	CG7330
34519	100677	1	1	821	7	1	0.00434854	chr2R	3;3	20551137	20551143	FBtr0100677	FBgn0034519	CG18065
27492	85204	1	1	4773	7	0.534039	0.0604289	chr3R	3;3	27563737	27563743	FBtr0085204	FBgn0027492	wdb
27492	85205	1	1	5017	7	0.534039	0.0604289	chr3R	3;3	27563737	27563743	FBtr0085205	FBgn0027492	wdb
27492	85208	1	1	4764	7	0.534039	0.0604289	chr3R	3;3	27563737	27563743	FBtr0085208	FBgn0027492	wdb
30240	73380	1	1	2403	7	0.651555	0.0461297	chrX	C;C	10851305	10851311	FBtr0073380	FBgn0030240	CG2202
37021	78277	1	1	1032	7	1	0.0336564	chr3L	C;C	20783752	20783758	FBtr0078277	FBgn0037021	CG11399
37021	78277	1	1	1137	7	1	0.00815304	chr3L	C;C	20783647	20783653	FBtr0078277	FBgn0037021	CG11399
37021	78277	1	1	2292	7	1	0.018657	chr3L	C;C	20782305	20782311	FBtr0078277	FBgn0037021	CG11399
11739	85720	1	1	2530	7	0.534039	0.102155	chr3R	C;C	30793211	30793217	FBtr0085720	FBgn0011739	wts
262570	345650	1	1	4071	7	1	0.0126008	chr2R	3;3	17481759	17481765	FBtr0345650	FBgn0262570	CG43110
31757	79172	1	1	741	7	1	0.00219276	chr2L	C;C	5969307	5969313	FBtr0079172	FBgn0031757	Ucp4C
33955	339982	1	1	1557	7	0.651555	0.00566487	chr2R	3;3	14670298	14670304	FBtr0339982	FBgn0033955	CG12866
33955	339981	1	1	1562	7	0.651555	0.00566487	chr2R	C;C	14670298	14670304	FBtr0339981	FBgn0033955	CG12866
33955	300765	1	1	1556	7	0.651555	0.00566487	chr2R	C;C	14670298	14670304	FBtr0300765	FBgn0033955	CG12866
33955	300764	1	1	1553	7	0.651555	0.00566487	chr2R	C;C	14670298	14670304	FBtr0300764	FBgn0033955	CG12866
19968	329956	1	1	3699	7	0.651555	0.0859242	chr2R	C;C	15523404	15523410	FBtr0329956	FBgn0019968	Khc-73
19968	329956	1	1	4142	7	0.534039	0.0152038	chr2R	C;C	15522906	15522912	FBtr0329956	FBgn0019968	Khc-73
19968	329957	1	1	3960	7	0.651555	0.0859242	chr2R	C;C	15523404	15523410	FBtr0329957	FBgn0019968	Khc-73
19968	329957	1	1	4403	7	0.534039	0.00270227	chr2R	C;C	15522906	15522912	FBtr0329957	FBgn0019968	Khc-73
19968	346265	1	1	4002	7	0.651555	0.0859242	chr2R	C;C	15523404	15523410	FBtr0346265	FBgn0019968	Khc-73
19968	346265	1	1	4445	7	0.534039	0.00270227	chr2R	C;C	15522906	15522912	FBtr0346265	FBgn0019968	Khc-73
19968	87357	1	1	4002	7	0.651555	0.0859242	chr2R	C;C	15523404	15523410	FBtr0087357	FBgn0019968	Khc-73
19968	87357	1	1	4445	7	0.534039	0.00276917	chr2R	C;C	15522906	15522912	FBtr0087357	FBgn0019968	Khc-73
19968	329955	1	1	3960	7	0.651555	0.0859242	chr2R	C;C	15523404	15523410	FBtr0329955	FBgn0019968	Khc-73
19968	329955	1	1	4403	7	0.534039	0.00270227	chr2R	C;C	15522906	15522912	FBtr0329955	FBgn0019968	Khc-73
3041	112817	1	1	1249	7	1	0.00141877	chr3L	C;C	7898418	7898424	FBtr0112817	FBgn0003041	pbl
3041	112817	1	1	1482	7	0.534039	0.15127	chr3L	C;C	7898122	7898128	FBtr0112817	FBgn0003041	pbl
3041	112817	1	1	1507	7	1	0.00327731	chr3L	C;C	7898097	7898103	FBtr0112817	FBgn0003041	pbl
3041	112817	1	1	2598	7	0.534039	0.0147385	chr3L	C;C	7896822	7896828	FBtr0112817	FBgn0003041	pbl
3041	76771	1	1	333	7	0.651555	0.165662	chr3L	5;5	7911615	7911621	FBtr0076771	FBgn0003041	pbl
3041	76771	1	1	1604	7	1	0.00141877	chr3L	C;C	7898418	7898424	FBtr0076771	FBgn0003041	pbl
3041	76771	1	1	1837	7	0.534039	0.15127	chr3L	C;C	7898122	7898128	FBtr0076771	FBgn0003041	pbl
3041	76771	1	1	1862	7	1	0.00327731	chr3L	C;C	7898097	7898103	FBtr0076771	FBgn0003041	pbl
3041	76771	1	1	2953	7	0.534039	0.0147385	chr3L	C;C	7896822	7896828	FBtr0076771	FBgn0003041	pbl
3041	76772	1	1	333	7	0.651555	0.165662	chr3L	5;5	7911615	7911621	FBtr0076772	FBgn0003041	pbl
3041	76772	1	1	2978	7	1	0.00141877	chr3L	C;C	7898418	7898424	FBtr0076772	FBgn0003041	pbl
3041	76772	1	1	3211	7	0.534039	0.15127	chr3L	C;C	7898122	7898128	FBtr0076772	FBgn0003041	pbl
3041	76772	1	1	3236	7	1	0.00327731	chr3L	C;C	7898097	7898103	FBtr0076772	FBgn0003041	pbl
3041	76772	1	1	4327	7	0.534039	0.0147385	chr3L	C;C	7896822	7896828	FBtr0076772	FBgn0003041	pbl
3041	76773	1	1	1242	7	1	0.00141877	chr3L	C;C	7898418	7898424	FBtr0076773	FBgn0003041	pbl
3041	76773	1	1	1475	7	0.534039	0.15127	chr3L	C;C	7898122	7898128	FBtr0076773	FBgn0003041	pbl
3041	76773	1	1	1500	7	1	0.00327731	chr3L	C;C	7898097	7898103	FBtr0076773	FBgn0003041	pbl
3041	76773	1	1	2591	7	0.534039	0.0147385	chr3L	C;C	7896822	7896828	FBtr0076773	FBgn0003041	pbl
3041	76774	1	1	2616	7	1	0.00141877	chr3L	C;C	7898418	7898424	FBtr0076774	FBgn0003041	pbl
3041	76774	1	1	2849	7	0.534039	0.15127	chr3L	C;C	7898122	7898128	FBtr0076774	FBgn0003041	pbl
3041	76774	1	1	2874	7	1	0.00327731	chr3L	C;C	7898097	7898103	FBtr0076774	FBgn0003041	pbl
3041	76774	1	1	3965	7	0.534039	0.0147385	chr3L	C;C	7896822	7896828	FBtr0076774	FBgn0003041	pbl
3041	306647	1	1	529	7	1	0.00141877	chr3L	C;C	7898418	7898424	FBtr0306647	FBgn0003041	pbl
3041	306647	1	1	762	7	0.534039	0.15127	chr3L	C;C	7898122	7898128	FBtr0306647	FBgn0003041	pbl
3041	306647	1	1	787	7	1	0.00327731	chr3L	C;C	7898097	7898103	FBtr0306647	FBgn0003041	pbl
3041	306647	1	1	1878	7	0.534039	0.0147385	chr3L	C;C	7896822	7896828	FBtr0306647	FBgn0003041	pbl
4581	344878	1	1	1039	7	0.651555	0.211522	chr2R	C;C	23857876	23857882	FBtr0344878	FBgn0004581	bgcn
4581	72232	1	1	1039	7	0.651555	0.211522	chr2R	C;C	23857876	23857882	FBtr0072232	FBgn0004581	bgcn
51739	80919	1	1	700	7	1	0.000494097	chr2L	C;C	16828263	16828269	FBtr0080919	FBgn0051739	AspRS-m
51739	331622	1	1	566	7	1	0.000494097	chr2L	C;C	16828263	16828269	FBtr0331622	FBgn0051739	AspRS-m
51739	331623	1	1	666	7	1	0.000494097	chr2L	C;C	16828263	16828269	FBtr0331623	FBgn0051739	AspRS-m
16081	333859	1	1	1064	7	1	0.347983	chr3L	C;C	9670970	9670976	FBtr0333859	FBgn0016081	fry
16081	333859	1	1	1880	7	0.534039	0.0928057	chr3L	C;C	9670154	9670160	FBtr0333859	FBgn0016081	fry
16081	333859	1	1	5917	7	0.534039	0.0764931	chr3L	C;C	9642613	9642619	FBtr0333859	FBgn0016081	fry
16081	333859	1	1	6944	7	0.534039	2.09015e-05	chr3L	C;C	9637276	9637282	FBtr0333859	FBgn0016081	fry
16081	333859	1	1	8392	7	1	0.0340623	chr3L	C;C	9635761	9635767	FBtr0333859	FBgn0016081	fry
16081	333859	1	1	8909	7	0.534039	0.0425399	chr3L	C;C	9634877	9634883	FBtr0333859	FBgn0016081	fry
16081	306240	1	1	1423	7	1	0.347983	chr3L	C;C	9670970	9670976	FBtr0306240	FBgn0016081	fry
16081	306240	1	1	2239	7	0.534039	0.0928057	chr3L	C;C	9670154	9670160	FBtr0306240	FBgn0016081	fry
16081	306240	1	1	6276	7	0.534039	0.0764931	chr3L	C;C	9642613	9642619	FBtr0306240	FBgn0016081	fry
16081	306240	1	1	7303	7	0.534039	2.09015e-05	chr3L	C;C	9637276	9637282	FBtr0306240	FBgn0016081	fry
16081	306240	1	1	8751	7	1	0.0340623	chr3L	C;C	9635761	9635767	FBtr0306240	FBgn0016081	fry
16081	306240	1	1	9268	7	0.534039	0.0425399	chr3L	C;C	9634877	9634883	FBtr0306240	FBgn0016081	fry
16081	306241	1	1	1064	7	1	0.347983	chr3L	C;C	9670970	9670976	FBtr0306241	FBgn0016081	fry
16081	306241	1	1	1880	7	0.534039	0.0928057	chr3L	C;C	9670154	9670160	FBtr0306241	FBgn0016081	fry
16081	306241	1	1	5773	7	0.534039	0.0764931	chr3L	C;C	9642613	9642619	FBtr0306241	FBgn0016081	fry
16081	306241	1	1	6800	7	0.534039	2.09015e-05	chr3L	C;C	9637276	9637282	FBtr0306241	FBgn0016081	fry
16081	306241	1	1	8248	7	1	0.0340623	chr3L	C;C	9635761	9635767	FBtr0306241	FBgn0016081	fry
16081	306241	1	1	8765	7	0.534039	0.0425399	chr3L	C;C	9634877	9634883	FBtr0306241	FBgn0016081	fry
16081	333858	1	1	1423	7	1	0.347983	chr3L	C;C	9670970	9670976	FBtr0333858	FBgn0016081	fry
16081	333858	1	1	2239	7	0.534039	0.0928057	chr3L	C;C	9670154	9670160	FBtr0333858	FBgn0016081	fry
16081	333858	1	1	6132	7	0.534039	0.0764931	chr3L	C;C	9642613	9642619	FBtr0333858	FBgn0016081	fry
16081	333858	1	1	7159	7	0.534039	2.09015e-05	chr3L	C;C	9637276	9637282	FBtr0333858	FBgn0016081	fry
16081	333858	1	1	8607	7	1	0.0340623	chr3L	C;C	9635761	9635767	FBtr0333858	FBgn0016081	fry
16081	333858	1	1	9124	7	0.534039	0.0425399	chr3L	C;C	9634877	9634883	FBtr0333858	FBgn0016081	fry
16081	301435	1	1	1064	7	1	0.347983	chr3L	C;C	9670970	9670976	FBtr0301435	FBgn0016081	fry
16081	301435	1	1	1880	7	0.534039	0.0928057	chr3L	C;C	9670154	9670160	FBtr0301435	FBgn0016081	fry
16081	301435	1	1	5917	7	0.534039	0.0764931	chr3L	C;C	9642613	9642619	FBtr0301435	FBgn0016081	fry
16081	301435	1	1	6944	7	0.534039	2.09015e-05	chr3L	C;C	9637276	9637282	FBtr0301435	FBgn0016081	fry
16081	301435	1	1	8392	7	1	0.0340623	chr3L	C;C	9635761	9635767	FBtr0301435	FBgn0016081	fry
16081	301435	1	1	8909	7	0.534039	0.0425399	chr3L	C;C	9634877	9634883	FBtr0301435	FBgn0016081	fry
16081	76417	1	1	1064	7	1	0.347983	chr3L	C;C	9670970	9670976	FBtr0076417	FBgn0016081	fry
16081	76417	1	1	1880	7	0.534039	0.0928057	chr3L	C;C	9670154	9670160	FBtr0076417	FBgn0016081	fry
16081	76417	1	1	5773	7	0.534039	0.0764931	chr3L	C;C	9642613	9642619	FBtr0076417	FBgn0016081	fry
16081	76417	1	1	6800	7	0.534039	2.09015e-05	chr3L	C;C	9637276	9637282	FBtr0076417	FBgn0016081	fry
16081	76417	1	1	8248	7	1	0.0340623	chr3L	C;C	9635761	9635767	FBtr0076417	FBgn0016081	fry
16081	76417	1	1	8765	7	0.534039	0.0425399	chr3L	C;C	9634877	9634883	FBtr0076417	FBgn0016081	fry
16081	306242	1	1	1064	7	1	0.347983	chr3L	C;C	9670970	9670976	FBtr0306242	FBgn0016081	fry
16081	306242	1	1	1880	7	0.534039	0.0928057	chr3L	C;C	9670154	9670160	FBtr0306242	FBgn0016081	fry
16081	306242	1	1	5917	7	0.534039	0.0764931	chr3L	C;C	9642613	9642619	FBtr0306242	FBgn0016081	fry
16081	306242	1	1	6944	7	0.534039	2.09015e-05	chr3L	C;C	9637276	9637282	FBtr0306242	FBgn0016081	fry
16081	306242	1	1	8392	7	1	0.0340623	chr3L	C;C	9635761	9635767	FBtr0306242	FBgn0016081	fry
16081	306242	1	1	8909	7	0.534039	0.0425399	chr3L	C;C	9634877	9634883	FBtr0306242	FBgn0016081	fry
16081	333860	1	1	1064	7	1	0.347983	chr3L	C;C	9670970	9670976	FBtr0333860	FBgn0016081	fry
16081	333860	1	1	1880	7	0.534039	0.0928057	chr3L	C;C	9670154	9670160	FBtr0333860	FBgn0016081	fry
16081	333860	1	1	5773	7	0.534039	0.0764931	chr3L	C;C	9642613	9642619	FBtr0333860	FBgn0016081	fry
16081	333860	1	1	6800	7	0.534039	2.09015e-05	chr3L	C;C	9637276	9637282	FBtr0333860	FBgn0016081	fry
16081	333860	1	1	8248	7	1	0.0340623	chr3L	C;C	9635761	9635767	FBtr0333860	FBgn0016081	fry
16081	333860	1	1	8765	7	0.534039	0.0425399	chr3L	C;C	9634877	9634883	FBtr0333860	FBgn0016081	fry
261563	302734	1	1	2672	7	1	0.0560263	chr2L	C;C	14320237	14320243	FBtr0302734	FBgn0261563	wb
261563	302734	1	1	3219	7	0.651555	0.0476181	chr2L	C;C	14320784	14320790	FBtr0302734	FBgn0261563	wb
261563	305063	1	1	691	7	0.534039	0.184823	chr2L	5;C	14263718	14263724	FBtr0305063	FBgn0261563	wb
261563	305063	1	1	823	7	0.534039	0.0681163	chr2L	C;C	14263850	14263856	FBtr0305063	FBgn0261563	wb
261563	305063	1	1	1682	7	1	0.0528373	chr2L	C;C	14286200	14286206	FBtr0305063	FBgn0261563	wb
261563	305063	1	1	3304	7	1	0.0430036	chr2L	C;C	14287822	14287828	FBtr0305063	FBgn0261563	wb
261563	305063	1	1	3497	7	0.534039	0.00236169	chr2L	C;C	14288317	14288323	FBtr0305063	FBgn0261563	wb
261563	305063	1	1	4822	7	1	0.0560263	chr2L	C;C	14320237	14320243	FBtr0305063	FBgn0261563	wb
261563	305063	1	1	5369	7	0.651555	0.0476181	chr2L	C;C	14320784	14320790	FBtr0305063	FBgn0261563	wb
261563	302733	1	1	2546	7	1	0.0560263	chr2L	C;C	14320237	14320243	FBtr0302733	FBgn0261563	wb
261563	302733	1	1	3093	7	0.651555	0.0476181	chr2L	C;C	14320784	14320790	FBtr0302733	FBgn0261563	wb
261563	302735	1	1	2485	7	1	0.0560263	chr2L	C;C	14320237	14320243	FBtr0302735	FBgn0261563	wb
261563	302735	1	1	3032	7	0.651555	0.0476181	chr2L	C;C	14320784	14320790	FBtr0302735	FBgn0261563	wb
261563	302731	1	1	691	7	0.534039	0.184823	chr2L	5;C	14263718	14263724	FBtr0302731	FBgn0261563	wb
261563	302731	1	1	823	7	0.534039	0.0681163	chr2L	C;C	14263850	14263856	FBtr0302731	FBgn0261563	wb
261563	302731	1	1	1682	7	1	0.0528373	chr2L	C;C	14286200	14286206	FBtr0302731	FBgn0261563	wb
261563	302731	1	1	3304	7	1	0.0430036	chr2L	C;C	14287822	14287828	FBtr0302731	FBgn0261563	wb
261563	302731	1	1	3497	7	0.534039	0.00236169	chr2L	C;C	14288317	14288323	FBtr0302731	FBgn0261563	wb
261563	302731	1	1	4822	7	1	0.0560263	chr2L	C;C	14320237	14320243	FBtr0302731	FBgn0261563	wb
261563	302731	1	1	5369	7	0.651555	0.0476181	chr2L	C;C	14320784	14320790	FBtr0302731	FBgn0261563	wb
261563	302732	1	1	2464	7	1	0.0560263	chr2L	C;C	14320237	14320243	FBtr0302732	FBgn0261563	wb
261563	302732	1	1	3011	7	0.651555	0.0476181	chr2L	C;C	14320784	14320790	FBtr0302732	FBgn0261563	wb
40813	346389	1	1	10	7	0.534039	0.000200215	chr3L	5;5	13356386	13356392	FBtr0346389	FBgn0040813	Nplp2
36995	78223	1	1	2879	7	0.534039	0.00811174	chr3L	C;C	20456992	20456998	FBtr0078223	FBgn0036995	atk
36995	331569	1	1	2564	7	0.534039	0.00811174	chr3L	C;C	20456992	20456998	FBtr0331569	FBgn0036995	atk
36995	331570	1	1	2681	7	0.534039	0.00811174	chr3L	C;C	20456992	20456998	FBtr0331570	FBgn0036995	atk
31306	332271	1	1	1740	7	1	0.0105669	chr2L	3;3	1140190	1140196	FBtr0332271	FBgn0031306	CG4577
31306	77957	1	1	1737	7	1	0.0105669	chr2L	3;3	1140190	1140196	FBtr0077957	FBgn0031306	CG4577
30628	74020	1	1	494	7	0.534039	0.0291495	chrX	C;C	15332654	15332660	FBtr0074020	FBgn0030628	CG9114
30628	74020	1	1	2282	7	0.651555	0.169645	chrX	3;3	15330810	15330816	FBtr0074020	FBgn0030628	CG9114
51935	77916	1	1	2946	7	1	0.0130726	chr2L	3;3	1594927	1594933	FBtr0077916	FBgn0051935	CG31935
29820	345313	1	1	1809	7	0.651555	0.026538	chrX	3;3	5882880	5882886	FBtr0345313	FBgn0029820	CG16721
29820	70821	1	1	2034	7	0.651555	0.026538	chrX	3;3	5882880	5882886	FBtr0070821	FBgn0029820	CG16721
29820	339948	1	1	1930	7	0.651555	0.026538	chrX	3;3	5882880	5882886	FBtr0339948	FBgn0029820	CG16721
53181	113453	1	1	532	7	1	0.0865806	chrX	5;5	8511275	8511281	FBtr0113453	FBgn0053181	CG33181
31489	331629	1	1	1084	7	1	0.107005	chr2L	3;3	3016712	3016718	FBtr0331629	FBgn0031489	CG17224
31489	77672	1	1	1217	7	1	0.107005	chr2L	3;3	3016712	3016718	FBtr0077672	FBgn0031489	CG17224
31489	77671	1	1	1242	7	1	0.0807578	chr2L	3;3	3016712	3016718	FBtr0077671	FBgn0031489	CG17224
31489	300815	1	1	1160	7	1	0.0807578	chr2L	3;3	3016712	3016718	FBtr0300815	FBgn0031489	CG17224
33983	303760	1	1	2515	7	0.534039	0.013576	chr2R	3;3	14929825	14929831	FBtr0303760	FBgn0033983	ADPS
37897	82387	1	1	736	7	0.651555	0.000264958	chr3R	C;C	11422882	11422888	FBtr0082387	FBgn0037897	CG5270
37897	82387	1	1	2664	7	1	0.0152727	chr3R	C;C	11424879	11424885	FBtr0082387	FBgn0037897	CG5270
37897	82387	1	1	5427	7	0.651555	0.00368072	chr3R	C;C	11427814	11427820	FBtr0082387	FBgn0037897	CG5270
37897	82387	1	1	6193	7	1	0.0119227	chr3R	C;C	11428580	11428586	FBtr0082387	FBgn0037897	CG5270
37648	81960	1	1	1240	7	0.534039	0.0959823	chr3R	3;3	8994720	8994726	FBtr0081960	FBgn0037648	CG11975
37648	336753	1	1	1240	7	0.534039	0.0959823	chr3R	3;3	8994720	8994726	FBtr0336753	FBgn0037648	CG11975
3079	344007	1	1	3203	7	1	0.0886886	chrX	C;C	2342762	2342768	FBtr0344007	FBgn0003079	Raf
3079	70401	1	1	2203	7	1	0.0886886	chrX	C;C	2342762	2342768	FBtr0070401	FBgn0003079	Raf
33076	305958	1	1	212	7	0.534039	0.133451	chr2R	C;C	6600706	6600712	FBtr0305958	FBgn0033076	CG15233
26378	86462	1	1	551	7	1	0.00137041	chr2R	C;C	19492697	19492703	FBtr0086462	FBgn0026378	Rep
261532	83619	1	1	886	7	0.651555	0.0719927	chr3R	C;C	18182427	18182433	FBtr0083619	FBgn0261532	cdm
261532	83619	1	1	2285	7	0.534039	0.0225614	chr3R	C;C	18180797	18180803	FBtr0083619	FBgn0261532	cdm
261532	336472	1	1	886	7	0.651555	0.0719927	chr3R	C;C	18182427	18182433	FBtr0336472	FBgn0261532	cdm
261532	336472	1	1	2285	7	0.534039	0.0225614	chr3R	C;C	18180797	18180803	FBtr0336472	FBgn0261532	cdm
52107	345345	1	1	1171	7	1	0.165319	chr3L	C;C	12860060	12860066	FBtr0345345	FBgn0052107	CG32107
52107	345344	1	1	1171	7	1	0.165319	chr3L	C;C	12860060	12860066	FBtr0345344	FBgn0052107	CG32107
285943	87126	1	1	2190	7	0.534039	0.0344776	chr2R	C;C	16497067	16497073	FBtr0087126	FBgn0285943	knon
36373	75810	1	1	1266	7	0.534039	0.128354	chr3L	C;C	13501855	13501861	FBtr0075810	FBgn0036373	Tgi
36373	75811	1	1	340	7	1	0.00562974	chr3L	C;C	13495967	13495973	FBtr0075811	FBgn0036373	Tgi
36373	75811	1	1	1407	7	0.534039	0.128354	chr3L	C;C	13501855	13501861	FBtr0075811	FBgn0036373	Tgi
50051	114521	1	1	389	7	1	0.00880576	chr2R	C;C	12436648	12436654	FBtr0114521	FBgn0050051	Tmem18
10380	74789	1	1	279	7	1	0.044394	chrX	C;C	19731568	19731574	FBtr0074789	FBgn0010380	AP-1-2beta
83960	110838	1	1	1039	7	1	0.141528	chr2L	C;C	4959565	4959571	FBtr0110838	FBgn0083960	CG34124
83960	110838	1	1	2837	7	0.534039	0.00337062	chr2L	C;C	4961476	4961482	FBtr0110838	FBgn0083960	CG34124
83960	110838	1	1	2897	7	0.651555	0.308574	chr2L	C;C	4961809	4961815	FBtr0110838	FBgn0083960	CG34124
264895	334850	1	1	690	7	0.534039	0.00527233	chr2L	C;C	7536462	7536468	FBtr0334850	FBgn0264895	RapGAP1
264895	334850	1	1	1521	7	0.651555	0.00590323	chr2L	C;C	7500882	7500888	FBtr0334850	FBgn0264895	RapGAP1
264895	334850	1	1	4129	7	1	0.021025	chr2L	3;3	7498131	7498137	FBtr0334850	FBgn0264895	RapGAP1
264895	334847	1	1	367	7	0.651555	0.058796	chr2L	5;5	7530201	7530207	FBtr0334847	FBgn0264895	RapGAP1
264895	334847	1	1	2010	7	0.651555	0.00590323	chr2L	C;C	7500882	7500888	FBtr0334847	FBgn0264895	RapGAP1
264895	334847	1	1	4618	7	1	0.021025	chr2L	3;3	7498131	7498137	FBtr0334847	FBgn0264895	RapGAP1
264895	334848	1	1	450	7	0.534039	0.000348677	chr2L	C;C	7536462	7536468	FBtr0334848	FBgn0264895	RapGAP1
264895	334848	1	1	1281	7	0.651555	0.00590323	chr2L	C;C	7500882	7500888	FBtr0334848	FBgn0264895	RapGAP1
264895	334848	1	1	3889	7	1	0.021025	chr2L	3;3	7498131	7498137	FBtr0334848	FBgn0264895	RapGAP1
264895	334846	1	1	773	7	0.534039	0.00527233	chr2L	C;C	7536462	7536468	FBtr0334846	FBgn0264895	RapGAP1
264895	334846	1	1	1604	7	0.651555	0.00590323	chr2L	C;C	7500882	7500888	FBtr0334846	FBgn0264895	RapGAP1
264895	334846	1	1	4212	7	1	0.021025	chr2L	3;3	7498131	7498137	FBtr0334846	FBgn0264895	RapGAP1
264895	334849	1	1	749	7	0.534039	0.000228801	chr2L	C;C	7536462	7536468	FBtr0334849	FBgn0264895	RapGAP1
264895	334849	1	1	1580	7	0.651555	0.00590323	chr2L	C;C	7500882	7500888	FBtr0334849	FBgn0264895	RapGAP1
264895	334849	1	1	4188	7	1	0.021025	chr2L	3;3	7498131	7498137	FBtr0334849	FBgn0264895	RapGAP1
39478	331705	1	1	1603	7	0.651555	0.0324426	chr3R	C;C	27060259	27060265	FBtr0331705	FBgn0039478	Nep5
39478	113296	1	1	1603	7	0.651555	0.0324426	chr3R	C;C	27060259	27060265	FBtr0113296	FBgn0039478	Nep5
39478	331704	1	1	1603	7	0.651555	0.0324426	chr3R	C;C	27060259	27060265	FBtr0331704	FBgn0039478	Nep5
39478	346156	1	1	2024	7	0.651555	0.0324426	chr3R	C;C	27060259	27060265	FBtr0346156	FBgn0039478	Nep5
20307	71775	1	1	2294	7	0.534039	0.0075204	chr2R	C;C	22283738	22283744	FBtr0071775	FBgn0020307	dve
20307	71775	1	1	4113	7	0.651555	0.120313	chr2R	3;3	22285680	22285686	FBtr0071775	FBgn0020307	dve
20307	71776	1	1	860	7	0.534039	0.0075204	chr2R	C;C	22283738	22283744	FBtr0071776	FBgn0020307	dve
20307	71776	1	1	2679	7	0.651555	0.120313	chr2R	3;3	22285680	22285686	FBtr0071776	FBgn0020307	dve
39877	307551	1	1	478	7	0.534039	0.0950147	chr3R	C;C	31793316	31793322	FBtr0307551	FBgn0039877	CG2118
39877	85856	1	1	299	7	0.534039	0.0950147	chr3R	C;C	31793316	31793322	FBtr0085856	FBgn0039877	CG2118
39877	85855	1	1	209	7	0.534039	0.0950147	chr3R	5;C	31793316	31793322	FBtr0085855	FBgn0039877	CG2118
39877	307552	1	1	78	7	0.534039	0.0950147	chr3R	5;C	31793316	31793322	FBtr0307552	FBgn0039877	CG2118
26438	301317	1	1	1695	7	0.651555	0.126699	chr2L	C;C	738803	738809	FBtr0301317	FBgn0026438	Eaat2
26438	301316	1	1	1924	7	0.651555	0.126699	chr2L	C;C	738803	738809	FBtr0301316	FBgn0026438	Eaat2
26438	78043	1	1	1583	7	0.651555	0.126699	chr2L	C;C	738803	738809	FBtr0078043	FBgn0026438	Eaat2
36911	89595	1	1	842	7	1	0.00669946	chr3L	C;C	19816648	19816654	FBtr0089595	FBgn0036911	Fibp
36911	89596	1	1	909	7	1	0.00669946	chr3L	C;C	19816648	19816654	FBtr0089596	FBgn0036911	Fibp
[truncated: 11,080 more rows]

## Sheet: oRNAment_genelists
chromosome	start	end	width	FBgn	FBtr	geneid	type	typecds	endtype	statisticscore	unpairedprobability	symbol	species	newFBgn	CGnumber	oldCGnumbers	type3utr	type5utr	CDS	UTR3	UTR5	RBPs	TMs	TFs	SPs	RNAipheno	corefibrillar
2R	8873980	8873986	7	FBgn0011286	FBtr0088638	RyR	C;C	C	C	1	0.00148562	RyR	Dmel	FBgn0011286	CG10844		NA	NA	1	NA	NA	0	1	0	1	0	0
X	4538289	4538295	7	FBgn0003210	FBtr0343568	rb	C;C	C	C	0.534039	0.0132336	rb	Dmel	FBgn0003210	CG11427		NA	NA	1	NA	NA	0	0	0	0	1	0
2R	13670290	13670296	7	FBgn0033864	FBtr0087627	CG18368	C;C	C	C	0.534039	0.00992595	CG18368	Dmel	FBgn0033864	CG18368		NA	NA	1	NA	NA	0	0	0	0	0	0
X	17655122	17655128	7	FBgn0030858	FBtr0074480	IntS2	C;C	C	C	1	0.0336307	IntS2	Dmel	FBgn0030858	CG8211		NA	NA	1	NA	NA	0	0	0	0	1	0
2R	12309206	12309212	7	FBgn0033710	FBtr0087893	CG17739	C;C	C	C	0.651555	0.00790651	CG17739	Dmel	FBgn0033710	CG17739		NA	NA	1	NA	NA	0	1	0	0	0	0
3R	21106349	21106355	7	FBgn0266674	FBtr0084034	Sec15	C;C	C	C	0.651555	0.0292614	Sec15	Dmel	FBgn0266674	CG7034		NA	NA	1	NA	NA	0	0	0	0	1	0
2R	23384770	23384776	7	FBgn0050414	FBtr0343204	CG30414	C;C	C	C	1	0.0123145	CG30414	Dmel	FBgn0050414	CG30414	CG3487	NA	NA	1	NA	NA	0	0	0	0	0	0
3R	8732837	8732843	7	FBgn0037622	FBtr0081914	CG8202	C;C	C	C	0.534039	0.0149539	CG8202	Dmel	FBgn0037622	CG8202		3	NA	1	1	NA	0	0	0	0	0	0
X	16012001	16012007	7	FBgn0052580	FBtr0074205	Muc14A	C;C	C	C	0.651555	0.0329491	Muc14A	Dmel	FBgn0052580	CG32580		NA	NA	1	NA	NA	0	0	0	0	0	0
3R	13283856	13283862	7	FBgn0038130	FBtr0082737	CG8630	C;C	C	C	0.534039	0.0148315	CG8630	Dmel	FBgn0038130	CG8630		NA	NA	1	NA	NA	0	1	0	0	0	1
3L	9682176	9682182	7	FBgn0087040	FBtr0076393	alphaTub67C	C;C	C	C	0.651555	0.0513043	alphaTub67C	Dmel	FBgn0087040	CG8308		NA	NA	1	NA	NA	0	0	0	0	1	0
2R	22163143	22163149	7	FBgn0000008	FBtr0071764	a	C;C	C	C	0.651555	0.00158753	a	Dmel	FBgn0000008	CG6741	CG13505	NA	NA	1	NA	NA	0	0	0	0	0	0
3R	24238518	24238524	7	FBgn0043884	FBtr0305043	mask	C;C	C	C	0.651555	0.00888388	mask	Dmel	FBgn0043884	CG33106	CG6268,CG6313,CG18671,CG31138	NA	NA	1	NA	NA	1	0	0	1	1	0
X	11790954	11790960	7	FBgn0030334	FBtr0073557	Karl	C;C	C	C	1	0.00258236	Karl	Dmel	FBgn0030334	CG4139		3	NA	1	1	NA	0	0	0	0	0	0
2L	13184584	13184590	7	FBgn0032478	FBtr0080437	CG5458	C;C	C	C	0.534039	0.000344852	Rsph1	Dmel	FBgn0032478	CG5458		NA	NA	1	NA	NA	0	0	0	0	1	0
3L	173902	173908	7	FBgn0035101	FBtr0299866	p130CAS	C;3	C	3	0.651555	0.0117051	p130CAS	Dmel	FBgn0035101	CG1212		NA	NA	1	NA	NA	0	0	0	0	0	0
3L	22873167	22873173	7	FBgn0037200	FBtr0078552	CG11109	C;C	C	C	0.534039	0.0665603	CG11109	Dmel	FBgn0037200	CG11109		NA	NA	1	NA	NA	1	0	0	0	0	0
3R	5650861	5650867	7	FBgn0262125	FBtr0310266	Sec23	C;C	C	C	0.534039	0.045913	Sec23	Dmel	FBgn0262125	CG1250		NA	NA	1	NA	NA	0	0	0	0	1	0
X	7382868	7382874	7	FBgn0261849	FBtr0303417	CG42781	C;C	C	C	0.534039	0.0293461	CG42781	Dmel	FBgn0261849	CG42781		NA	NA	1	NA	NA	0	0	0	0	0	0
2R	8900952	8900958	7	FBgn0033341	FBtr0088684	MrgBP	C;C	C	C	1	0.00847934	MrgBP	Dmel	FBgn0033341	CG13746		NA	NA	1	NA	NA	0	0	0	0	1	0
3R	15082018	15082024	7	FBgn0038286	FBtr0344380	CG6966	C;C	C	C	0.534039	0.0207501	CG6966	Dmel	FBgn0038286	CG6966		NA	NA	1	NA	NA	0	0	0	0	0	0
3R	4183913	4183919	7	FBgn0037213	FBtr0078962	CG12581	C;C	C	C	0.534039	0.00223815	CG12581	Dmel	FBgn0037213	CG12581		3	NA	1	1	NA	0	0	0	0	0	0
X	2727958	2727964	7	FBgn0000520	FBtr0070487	dwg	C;C	C	C	0.534039	0.0989236	dwg	Dmel	FBgn0000520	CG2711	CG2714	NA	NA	1	NA	NA	0	0	1	0	0	0
X	11168521	11168527	7	FBgn0026268	FBtr0073468	antdh	C;C	C	C	0.534039	0.0322554	antdh	Dmel	FBgn0026268	CG1386		NA	NA	1	NA	NA	0	0	0	0	0	0
3R	14219665	14219671	7	FBgn0051326	FBtr0082901	CG31326	C;C	C	C	0.534039	0.105099	CG31326	Dmel	FBgn0051326	CG31326	CG9645	3	NA	1	1	NA	0	0	0	0	0	0
2R	13151045	13151051	7	FBgn0263998	FBtr0330332	Ack-like	C;C	C	C	1	0.0019641	Ack-like	Dmel	FBgn0263998	CG43741	CG3969,CG33007	3	NA	1	1	NA	0	0	0	0	0	0
3L	9718574	9718580	7	FBgn0036035	FBtr0076412	CG18178	C;C	C	C	0.534039	0.00305786	CG18178	Dmel	FBgn0036035	CG18178		NA	NA	1	NA	NA	1	0	0	0	0	0
3R	29824595	29824601	7	FBgn0039704	FBtr0085485	neo	C;C	C	C	1	0.00917539	neo	Dmel	FBgn0039704	CG7802		NA	NA	1	NA	NA	0	1	0	0	0	0
3L	8678181	8678187	7	FBgn0001168	FBtr0100153	h	C;C	C	C	0.534039	0.010125	h	Dmel	FBgn0001168	CG6494		NA	NA	1	NA	NA	0	0	1	0	0	0
2L	9923601	9923607	7	FBgn0032163	FBtr0079898	TbCMF46	C;C	C	C	0.651555	0.0331971	TbCMF46	Dmel	FBgn0032163	CG13125		NA	NA	1	NA	NA	0	0	0	0	0	0
3R	28304303	28304309	7	FBgn0039577	FBtr0301672	CG12516	C;C	C	C	0.651555	0.0387574	CG12516	Dmel	FBgn0039577	CG12516		NA	NA	1	NA	NA	0	0	0	0	0	0
3R	15788758	15788764	7	FBgn0038361	FBtr0083173	CG9589	C;C	C	C	0.651555	0.00973783	Uros2	Dmel	FBgn0038361	CG9589		NA	NA	1	NA	NA	0	0	0	0	0	0
3R	21232735	21232741	7	FBgn0000527	FBtr0084106	e	C;C	C	C	1	0.000274332	e	Dmel	FBgn0000527	CG3331		NA	NA	1	NA	NA	0	0	0	0	0	0
3R	10001018	10001024	7	FBgn0037773	FBtr0306611	CG5359	C;C	C	C	0.534039	0.150558	CG5359	Dmel	FBgn0037773	CG5359		NA	NA	1	NA	NA	0	0	0	0	0	0
3R	27164657	27164663	7	FBgn0051065	FBtr0113383	ppk31	C;C	C	C	0.651555	0.00894375	ppk31	Dmel	FBgn0051065	CG31065		NA	NA	1	NA	NA	0	1	0	0	0	0
X	11771178	11771184	7	FBgn0004511	FBtr0073612	dy	C;C	C	C	0.651555	0.0328995	dy	Dmel	FBgn0004511	CG9355		NA	NA	1	NA	NA	0	1	0	0	0	0
3R	30360012	30360018	7	FBgn0010113	FBtr0085619	hdc	C;C	C	C	0.651555	0.0611929	hdc	Dmel	FBgn0010113	CG15532		3	NA	1	1	NA	0	0	0	0	1	0
X	7906090	7906096	7	FBgn0029974	FBtr0071134	dpr14	C;C	C	C	1	0.0341621	dpr14	Dmel	FBgn0029974	CG10946		3	5	1	1	1	0	1	0	0	0	0
3R	15210474	15210480	7	FBgn0038300	FBtr0083048	Mau2	C;C	C	C	0.534039	0.0149047	Mau2	Dmel	FBgn0038300	CG4203		NA	NA	1	NA	NA	0	0	0	0	0	0
3R	31601192	31601198	7	FBgn0039858	FBtr0085802	CycG	C;C	C	C	0.651555	0.0347023	CycG	Dmel	FBgn0039858	CG11525		NA	NA	1	NA	NA	0	0	0	0	1	0
3R	25776052	25776058	7	FBgn0039368	FBtr0337040	CG17196	C;C	C	C	0.651555	0.0492748	CG17196	Dmel	FBgn0039368	CG17196		NA	NA	1	NA	NA	0	1	0	0	0	0
2R	6.13826e+06	6.13826e+06	7	FBgn0033063	FBtr0332948	CG14589	C;C	C	C	0.651555	0.00441072	CG14589	Dmel	FBgn0033063	CG14589		NA	NA	1	NA	NA	0	0	0	0	1	0
3R	24924493	24924499	7	FBgn0039250	FBtr0084716	Mink	C;C	C	C	0.651555	0.153479	Mink	Dmel	FBgn0039250	CG11120		NA	NA	1	NA	NA	0	0	0	0	0	0
2R	11590785	11590791	7	FBgn0033636	FBtr0333071	tou	C;C	C	C	0.534039	0.0113152	tou	Dmel	FBgn0033636	CG10897		NA	NA	1	NA	NA	0	0	0	0	0	0
2R	4619918	4619924	7	FBgn0032997	FBtr0299924	CG17486	C;C	C	C	1	0.0107087	CG17486	Dmel	FBgn0032997	CG17486	CG40291	NA	NA	1	NA	NA	0	0	0	0	0	0
3L	19301040	19301046	7	FBgn0003089	FBtr0300340	pip	C;C	C	C	0.534039	0.0230737	pip	Dmel	FBgn0003089	CG9614		NA	NA	1	NA	NA	0	1	0	0	0	0
2L	2951229	2951235	7	FBgn0041111	FBtr0077633	lilli	C;C	C	C	0.534039	0.234757	lilli	Dmel	FBgn0041111	CG8817		NA	NA	1	NA	NA	0	0	1	0	0	0
X	2719349	2719355	7	FBgn0024973	FBtr0070498	CG2701	C;C	C	C	0.534039	0.00878952	CG2701	Dmel	FBgn0024973	CG2701		NA	NA	1	NA	NA	0	0	0	0	0	0
2R	24924158	24924164	7	FBgn0060296	FBtr0072417	pain	C;C	C	C	1	0.0232079	pain	Dmel	FBgn0060296	CG15860		NA	NA	1	NA	NA	0	1	0	0	0	0
2R	10610800	10610806	7	FBgn0263102	FBtr0088276	psq	C;C	C	C	1	0.00107392	psq	Dmel	FBgn0263102	CG2368		3	5	1	1	1	0	0	1	0	0	0
3R	21130792	21130798	7	FBgn0038860	FBtr0084015	Ice2	C;C	C	C	1	4.39266e-05	Ice2	Dmel	FBgn0038860	CG10825		NA	5	1	NA	1	0	0	0	0	0	0
2R	25228726	25228732	7	FBgn0001325	FBtr0333162	Kr	C;C	C	C	0.534039	0.0708724	Kr	Dmel	FBgn0001325	CG3340		NA	NA	1	NA	NA	0	0	1	0	0	0
X	257240	257246	7	FBgn0000316	FBtr0070064	cin	C;C	C	C	1	0.0127775	cin	Dmel	FBgn0000316	CG2945		NA	5	1	NA	1	0	0	0	0	0	0
3L	15577794	15577800	7	FBgn0036512	FBtr0075563	CG16979	C;C	C	C	0.534039	0.0357099	CG16979	Dmel	FBgn0036512	CG16979		NA	NA	1	NA	NA	0	1	0	0	0	0
2L	4837117	4837123	7	FBgn0031635	FBtr0077412	tank	C;C	C	C	1	0.00500208	tank	Dmel	FBgn0031635	CG15626		NA	NA	1	NA	NA	0	1	0	0	0	0
3R	1454991	1454997	7	FBgn0267431	FBtr0392909	Myo81F	C;C	C	C	0.534039	0.00182834	Myo81F	Dmel	FBgn0267431	CG45784	CG42621,CG15831,CG40155,CG42622,CG41518,CG42623,CG40204,CG42624,CG41281,CG41527	NA	NA	1	NA	NA	0	1	0	0	0	0
2L	8404768	8404774	7	FBgn0020497	FBtr0079663	emb	C;C	C	C	0.651555	0.0257736	emb	Dmel	FBgn0020497	CG13387		NA	NA	1	NA	NA	0	0	0	0	1	0
2L	8444873	8444879	7	FBgn0051897	FBtr0079673	CG31897	C;C	C	C	0.651555	0.115136	CG31897	Dmel	FBgn0051897	CG31897		NA	NA	1	NA	NA	0	0	0	0	0	0
3L	13176512	13176518	7	FBgn0086916	FBtr0334063	snky	C;C	C	C	0.651555	0.0567277	snky	Dmel	FBgn0086916	CG11281		NA	NA	1	NA	NA	0	1	0	0	0	0
2L	9913657	9913663	7	FBgn0024285	FBtr0079875	Srp54	C;C	C	C	0.651555	0.0740133	Srp54	Dmel	FBgn0024285	CG4602		NA	NA	1	NA	NA	1	0	0	0	0	0
3R	27019183	27019189	7	FBgn0039473	FBtr0085152	CG17191	C;C	C	C	0.651555	0.119292	CG17191	Dmel	FBgn0039473	CG17191		NA	NA	1	NA	NA	0	0	0	0	0	0
2R	21825712	21825718	7	FBgn0034662	FBtr0302446	CG13492	C;C	C	C	0.651555	0.00612924	CG13492	Dmel	FBgn0034662	CG13492		NA	NA	1	NA	NA	0	0	0	0	0	0
X	5784684	5784690	7	FBgn0261610	FBtr0302921	CG42699	C;C	C	C	0.534039	0.00466991	CG42699	Dmel	FBgn0261610	CG42699	CG15770,CG4064	NA	NA	1	NA	NA	0	0	0	0	0	0
2R	24398129	24398135	7	FBgn0035001	FBtr0072366	Slik	C;C	C	C	0.651555	0.0721627	Slik	Dmel	FBgn0035001	CG4527		NA	NA	1	NA	NA	0	0	0	0	0	0
X	18384501	18384507	7	FBgn0008635	FBtr0074576	betaCOP	C;C	C	C	1	0.0250734	betaCOP	Dmel	FBgn0008635	CG6223		NA	NA	1	NA	NA	0	0	0	0	1	0
3R	18301439	18301445	7	FBgn0038601	FBtr0083594	CG18600	C;C	C	C	0.534039	0.00198087	Polr1E	Dmel	FBgn0038601	CG18600		NA	NA	1	NA	NA	0	0	0	0	1	0
2L	1867063	1867069	7	FBgn0051663	FBtr0077893	CG31663	C;C	C	C	0.651555	0.00454633	CG31663	Dmel	FBgn0051663	CG31663	CG15360,CG15359	NA	5	1	NA	1	0	1	0	0	0	0
2L	10581322	10581328	7	FBgn0085190	FBtr0301006	CG34161	C;C	C	C	0.651555	0.0294428	CG34161	Dmel	FBgn0085190	CG34161		NA	NA	1	NA	NA	0	0	0	0	0	0
3L	21517583	21517589	7	FBgn0037093	FBtr0332716	Cdk12	C;C	C	C	1	0.0405662	Cdk12	Dmel	FBgn0037093	CG7597		3	NA	1	1	NA	0	0	0	0	1	0
X	9602093	9602099	7	FBgn0030141	FBtr0071363	Gga	C;C	C	C	0.651555	0.0166841	Gga	Dmel	FBgn0030141	CG3002		NA	NA	1	NA	NA	0	0	0	0	0	0
X	9754456	9754462	7	FBgn0020378	FBtr0071381	Sp1	C;C	C	C	1	0.0102238	Sp1	Dmel	FBgn0020378	CG1343		NA	NA	1	NA	NA	0	0	1	0	0	0
X	18852051	18852057	7	FBgn0085451	FBtr0310365	htk	C;C	C	C	0.534039	0.0098057	htk	Dmel	FBgn0085451	CG34422	CG7282,CG7274	NA	NA	1	NA	NA	0	0	1	0	1	0
X	11584969	11584975	7	FBgn0002948	FBtr0340297	nod	C;C	C	C	0.534039	0.111799	nod	Dmel	FBgn0002948	CG1763		NA	NA	1	NA	NA	0	0	0	0	0	0
X	20935853	20935859	7	FBgn0261675	FBtr0077239	Npc1b	C;C	C	C	1	0.0210339	Npc1b	Dmel	FBgn0261675	CG12092	CG11233	NA	NA	1	NA	NA	0	1	0	0	0	0
3L	597390	597396	7	FBgn0035145	FBtr0072554	MED14	C;C	C	C	0.534039	0.041375	MED14	Dmel	FBgn0035145	CG12031		NA	NA	1	NA	NA	0	0	0	0	0	0
2L	578751	578757	7	FBgn0023489	FBtr0078070	Pph13	C;C	C	C	0.534039	0.0249055	Pph13	Dmel	FBgn0023489	CG2819		NA	NA	1	NA	NA	0	0	1	0	0	0
3R	24137133	24137139	7	FBgn0266673	FBtr0084547	Sec10	C;C	C	C	1	0.0257121	Sec10	Dmel	FBgn0266673	CG6159		NA	NA	1	NA	NA	0	0	0	0	0	0
2R	20748394	20748400	7	FBgn0040726	FBtr0086238	dpr1	C;C	C	C	1	0.000184514	dpr1	Dmel	FBgn0040726	CG13439		NA	NA	1	NA	NA	0	0	0	0	0	0
2R	17602475	17602481	7	FBgn0029006	FBtr0086833	Smurf	C;C	C	C	0.651555	0.114623	Smurf	Dmel	FBgn0029006	CG4943		NA	5	1	NA	1	0	0	0	0	0	0
2R	23472591	23472597	7	FBgn0034866	FBtr0072020	Or59c	C;C	C	C	1	0.0136495	Or59c	Dmel	FBgn0034866	CG17226		NA	NA	1	NA	NA	0	1	0	0	0	0
X	17158333	17158339	7	FBgn0028974	FBtr0074404	xmas-2	C;C	C	C	0.651555	0.0217701	xmas	Dmel	FBgn0286809	CG46386	CG32561,CG32562,CG8919	NA	NA	1	NA	NA	1	0	0	0	0	0
2L	1174940	1174946	7	FBgn0031318	FBtr0077966	CG4887	C;C	C	C	0.534039	0.00412042	CG4887	Dmel	FBgn0031318	CG4887		NA	NA	1	NA	NA	1	0	0	0	0	0
X	13673040	13673046	7	FBgn0030508	FBtr0340398	CG15760	C;C	C	C	1	0.0190655	CG15760	Dmel	FBgn0030508	CG15760		NA	5	1	NA	1	0	1	0	0	0	0
2R	15757904	15757910	7	FBgn0050089	FBtr0340007	CG30089	C;C	C	C	0.534039	0.0273193	CG30089	Dmel	FBgn0050089	CG30089	CG12305,CG12967,CG12966	NA	NA	1	NA	NA	0	1	0	0	0	0
3R	18010050	18010056	7	FBgn0263995	FBtr0330277	cpo	C;C	C	C	0.534039	0.0372579	cpo	Dmel	FBgn0263995	CG43738	CG31243,CG42457,CG12349,CG18435,CG18434	3	NA	1	1	NA	1	0	0	0	0	0
3L	8255456	8255462	7	FBgn0263219	FBtr0299841	Dscam4	C;C	C	C	1	0.00578282	Dscam4	Dmel	FBgn0263219	CG42330	CG13672,CG33274,CG7060,CG18630	3	5	1	1	1	0	1	0	0	0	0
3R	15364797	15364803	7	FBgn0085433	FBtr0112669	CG34404	C;C	C	C	0.534039	0.00565744	CG34404	Dmel	FBgn0085433	CG34404	CG6156,CG18496	NA	NA	1	NA	NA	0	0	0	0	0	0
3L	19388330	19388336	7	FBgn0036868	FBtr0330281	ms(3)76Ba	C;C	C	C	0.651555	0.0559789	ms(3)76Ba	Dmel	FBgn0036868	CG14087		NA	NA	1	NA	NA	0	0	0	0	0	0
2R	13950542	13950548	7	FBgn0262739	FBtr0087613	AGO1	C;C	C	C	1	0.0675758	AGO1	Dmel	FBgn0262739	CG6671		3	NA	1	1	NA	1	0	0	0	0	0
3L	22715830	22715836	7	FBgn0037182	FBtr0078540	ArfGAP3	C;C	C	C	0.534039	0.0266107	ArfGAP3	Dmel	FBgn0037182	CG6838		NA	NA	1	NA	NA	0	0	0	0	0	0
3L	8329284	8329290	7	FBgn0085491	FBtr0112768	CG34462	C;C	C	C	0.651555	0.00667233	CG34462	Dmel	FBgn0085491	CG34462	CG7072	NA	NA	1	NA	NA	0	0	0	0	0	0
2R	17045003	17045009	7	FBgn0034182	FBtr0331984	SmydA-7	C;C	C	C	0.534039	0.0111583	SmydA-7	Dmel	FBgn0034182	CG9640		NA	NA	1	NA	NA	0	0	0	0	0	1
4	49637	49643	7	FBgn0004859	FBtr0089178	ci	C;C	C	C	0.534039	0.0358356	ci	Dmel	FBgn0004859	CG2125		3	NA	1	1	NA	0	0	1	0	0	0
2L	17531274	17531280	7	FBgn0032649	FBtr0080991	CG15145	C;C	C	C	1	0.0755266	CG15145	Dmel	FBgn0032649	CG15145		NA	NA	1	NA	NA	0	0	0	0	0	0
2L	5221492	5221498	7	FBgn0003716	FBtr0079086	tkv	C;C	C	C	1	0.0386806	tkv	Dmel	FBgn0003716	CG14026		NA	NA	1	NA	NA	0	1	0	0	0	0
2L	19515326	19515332	7	FBgn0032797	FBtr0302107	Hasp	C;C	C	C	0.534039	0.140007	Hasp	Dmel	FBgn0032797	CG10186		NA	NA	1	NA	NA	0	0	0	0	0	0
2R	7846897	7846903	7	FBgn0085390	FBtr0308590	Dgk	C;C	C	C	1	0.0191257	Dgk	Dmel	FBgn0085390	CG34361	CG12820,CG18654,CG1535	NA	NA	1	NA	NA	0	0	0	0	0	0
2L	6803323	6803329	7	FBgn0031860	FBtr0309812	CG11236	C;C	C	C	0.534039	0.0603941	Daao2	Dmel	FBgn0031860	CG11236		NA	NA	1	NA	NA	0	0	0	0	0	0
2R	23842684	23842690	7	FBgn0003401	FBtr0072237	shu	C;C	C	C	0.534039	0.0153672	shu	Dmel	FBgn0003401	CG4735		NA	NA	1	NA	NA	0	0	0	0	0	0
3R	29696128	29696134	7	FBgn0039683	FBtr0085454	dmrt99B	C;C	C	C	1	0.0172687	dmrt99B	Dmel	FBgn0039683	CG15504		NA	NA	1	NA	NA	0	0	1	0	0	0
3R	27320064	27320070	7	FBgn0039510	FBtr0273192	CG3339	C;C	C	C	0.651555	0.029898	CG3339	Dmel	FBgn0039510	CG3339		NA	NA	1	NA	NA	0	0	0	0	0	0
3R	23052710	23052716	7	FBgn0041225	FBtr0084346	Gr94a	C;C	C	C	0.534039	0.213902	Gr94a	Dmel	FBgn0041225	CG31280		NA	NA	1	NA	NA	0	1	0	0	0	0
X	6099652	6099658	7	FBgn0029843	FBtr0070873	Nep1	C;C	C	C	0.651555	0.159757	Nep1	Dmel	FBgn0029843	CG5905	CG5894,CG5914	NA	NA	1	NA	NA	0	1	0	0	1	0
2L	2.28493e+07	2.28493e+07	7	FBgn0041004	FBtr0306550	CG17715	C;C	C	C	0.534039	0.0500438	CG17715	Dmel	FBgn0041004	CG17715	CG18603	NA	NA	1	NA	NA	0	1	0	0	0	0
2R	24494736	24494742	7	FBgn0029501	FBtr0072299	Crtp	C;C	C	C	0.534039	0.0620753	Crtp	Dmel	FBgn0029501	CG13580		NA	NA	1	NA	NA	0	0	0	0	0	0
3L	22287877	22287883	7	FBgn0011771	FBtr0078510	Hem	C;C	C	C	0.534039	0.109238	Hem	Dmel	FBgn0011771	CG5837		NA	NA	1	NA	NA	0	1	0	0	0	0
X	17748714	17748720	7	FBgn0261570	FBtr0340629	CG42684	C;C	C	C	0.534039	0.0016695	raskol	Dmel	FBgn0261570	CG42684	CG32560,CG32559,CG42270,CG15816,CG5960,CG5898	NA	NA	1	NA	NA	0	0	0	0	0	0
2R	9372753	9372759	7	FBgn0033405	FBtr0332997	CG13954	C;C	C	C	1	0.00282885	CG13954	Dmel	FBgn0033405	CG13954		3	NA	1	1	NA	0	1	0	0	0	0
3R	8984112	8984118	7	FBgn0037647	FBtr0082013	RagA-B	C;C	C	C	0.534039	0.128329	RagA-B	Dmel	FBgn0037647	CG11968		NA	NA	1	NA	NA	0	0	0	0	0	0
2L	3700971	3700977	7	FBgn0259956	FBtr0300302	Sfp24C1	C;C	C	C	0.534039	0.120163	Sfp24C1	Dmel	FBgn0259956	CG42466		NA	NA	1	NA	NA	0	0	0	0	0	0
X	11132898	11132904	7	FBgn0030268	FBtr0346270	Klp10A	C;C	C	C	0.651555	0.0199364	Klp10A	Dmel	FBgn0030268	CG1453		NA	NA	1	NA	NA	0	0	0	0	0	0
3L	1.2778e+07	1.2778e+07	7	FBgn0052106	FBtr0307887	CG32106	C;C	C	C	0.651555	0.175235	CG32106	Dmel	FBgn0052106	CG32106		NA	NA	1	NA	NA	0	0	0	0	0	0
3R	31617188	31617194	7	FBgn0039860	FBtr0085819	CG1792	C;C	C	C	1	0.00349719	CG1792	Dmel	FBgn0039860	CG1792		NA	NA	1	NA	NA	0	0	1	0	0	0
3R	12959338	12959344	7	FBgn0040493	FBtr0082730	grsm	C;C	C	C	1	0.0219171	grsm	Dmel	FBgn0040493	CG7340		NA	NA	1	NA	NA	0	0	0	0	0	0
2R	10461206	10461212	7	FBgn0001122	FBtr0088272	Galphao	C;C	C	C	0.651555	0.0078939	Galphao	Dmel	FBgn0001122	CG2204		3	NA	1	1	NA	0	0	0	0	0	0
X	7103115	7103121	7	FBgn0029936	FBtr0071019	CG4617	C;C	C	C	0.651555	0.0524633	CG4617	Dmel	FBgn0029936	CG4617		NA	NA	1	NA	NA	0	0	0	0	0	0
3R	9019151	9019157	7	FBgn0264075	FBtr0082005	tgo	C;C	C	C	0.534039	0.00325901	tgo	Dmel	FBgn0264075	CG11987		NA	NA	1	NA	NA	0	0	1	0	0	0
2R	19454388	19454394	7	FBgn0034447	FBtr0086535	CG7744	C;C	C	C	0.534039	0.00518475	CG7744	Dmel	FBgn0034447	CG7744		NA	5	1	NA	1	0	1	0	0	1	0
X	14848100	14848106	7	FBgn0030587	FBtr0073986	CG9522	C;C	C	C	0.534039	0.0429733	CG9522	Dmel	FBgn0030587	CG9522		NA	NA	1	NA	NA	0	0	0	0	0	0
3R	7070462	7070468	7	FBgn0037466	FBtr0081634	CG1965	C;C	C	C	1	0.00763749	CG1965	Dmel	FBgn0037466	CG1965		3	NA	1	1	NA	0	0	0	0	1	0
2R	16326599	16326605	7	FBgn0262511	FBtr0087176	Vha44	C;C	C	C	1	0.0551873	Vha44	Dmel	FBgn0287825	CG8048		NA	NA	1	NA	NA	0	0	0	0	0	0
2R	17491061	17491067	7	FBgn0050104	FBtr0086928	NT5E-2	C;C	C	C	1	0.0435022	NT5E-2	Dmel	FBgn0050104	CG30104	CG4837	NA	NA	1	NA	NA	0	1	0	0	0	0
3R	21776555	21776561	7	FBgn0038902	FBtr0084132	CG6800	C;C	C	C	0.651555	0.00152131	CG6800	Dmel	FBgn0038902	CG6800		NA	NA	1	NA	NA	0	0	0	0	0	0
3R	11712125	11712131	7	FBgn0037940	FBtr0082428	CG14720	C;C	C	C	0.534039	0.0415518	CG14720	Dmel	FBgn0037940	CG14720		NA	NA	1	NA	NA	0	0	0	0	0	0
2R	14291768	14291774	7	FBgn0263397	FBtr0290292	Ih	C;C	C	C	1	0.039641	Ih	Dmel	FBgn0263397	CG8585	CR30068	NA	NA	1	NA	NA	0	1	0	0	0	0
3L	11585830	11585836	7	FBgn0003292	FBtr0076146	rt	C;C	C	C	1	0.00488202	rt	Dmel	FBgn0003292	CG6097		NA	NA	1	NA	NA	0	1	0	1	0	0
3L	12785773	12785779	7	FBgn0260945	FBtr0300561	Atg1	C;C	C	C	0.534039	0.0150069	Atg1	Dmel	FBgn0260945	CG10967		NA	NA	1	NA	NA	0	0	0	0	0	0
3R	18900018	18900024	7	FBgn0003248	FBtr0083697	Rh2	C;C	C	C	0.651555	0.00143958	Rh2	Dmel	FBgn0003248	CG16740		NA	NA	1	NA	NA	0	1	0	0	0	0
2L	15256230	15256236	7	FBgn0283467	FBtr0336864	Pol32	C;C	C	C	0.651555	0.00696983	PolD3	Dmel	FBgn0283467	CG3975		NA	NA	1	NA	NA	0	0	0	0	0	0
3L	1309315	1309321	7	FBgn0035205	FBtr0072669	Ctr9	C;C	C	C	0.534039	0.0989872	Ctr9	Dmel	FBgn0035205	CG2469		NA	NA	1	NA	NA	0	0	0	0	0	0
X	18086353	18086359	7	FBgn0030891	FBtr0339540	Ada3	C;C	C	C	0.534039	0.0157489	Ada3	Dmel	FBgn0030891	CG7098		NA	NA	1	NA	NA	0	0	0	0	0	0
3L	9749208	9749214	7	FBgn0259163	FBtr0331540	CG42268	C;C	C	C	0.534039	0.176133	CG42268	Dmel	FBgn0259163	CG42268	CG32044,CG32046,CG6740,CG14170	NA	5	1	NA	1	0	0	0	0	0	0
2R	13441237	13441243	7	FBgn0013765	FBtr0087704	cnn	C;C	C	C	1	0.00876717	cnn	Dmel	FBgn0013765	CG4832	CG18370	NA	NA	1	NA	NA	0	1	0	0	0	0
3L	1306400	1306406	7	FBgn0035204	FBtr0331867	CG2277	C;C	C	C	0.534039	0.0115089	Nt5a	Dmel	FBgn0035204	CG2277		NA	NA	1	NA	NA	0	0	0	0	0	0
2R	19383658	19383664	7	FBgn0034440	FBtr0086523	CG10073	C;C	C	C	0.651555	0.0310017	CG10073	Dmel	FBgn0034440	CG10073		NA	NA	1	NA	NA	0	1	0	0	0	0
3R	17151194	17151200	7	FBgn0038490	FBtr0083409	CG5285	C;C	C	C	0.534039	0.00971071	Smug	Dmel	FBgn0038490	CG5285		NA	NA	1	NA	NA	0	0	0	0	0	0
3L	19601774	19601780	7	FBgn0036890	FBtr0074942	CG9368	C;C	C	C	1	0.0156536	CG9368	Dmel	FBgn0036890	CG9368		3	NA	1	1	NA	0	1	0	0	0	0
3R	25337914	25337920	7	FBgn0028647	FBtr0300735	CG11902	C;C	C	C	0.651555	0.01987	CG11902	Dmel	FBgn0028647	CG11902		NA	NA	1	NA	NA	0	0	1	0	0	0
3L	5882425	5882431	7	FBgn0035643	FBtr0077027	CG13287	C;C	C	C	0.534039	0.0300559	CG13287	Dmel	FBgn0035643	CG13287		NA	NA	1	NA	NA	0	0	1	0	1	0
3L	27973760	27973766	7	FBgn0039959	FBtr0113748	CG17514	C;C	C	C	1	0.00317142	l(3)80Fj	Dmel	FBgn0287182	CG17514		NA	NA	1	NA	NA	0	0	0	0	0	0
3R	4380257	4380263	7	FBgn0037239	FBtr0078914	Sfxn1-3	C;C	C	C	1	0.0176498	Sfxn1-3	Dmel	FBgn0037239	CG11739		NA	NA	1	NA	NA	0	1	0	0	0	0
3R	27667723	27667729	7	FBgn0039536	FBtr0330108	unc80	C;C	C	C	0.534039	8.37702e-05	unc80	Dmel	FBgn0039536	CG18437		NA	NA	1	NA	NA	0	1	0	0	0	0
3R	26995486	26995492	7	FBgn0039469	FBtr0085075	TwdlC	C;C	C	C	0.534039	0.0101939	TwdlC	Dmel	FBgn0039469	CG14254		NA	NA	1	NA	NA	0	0	0	0	0	0
2R	14172602	14172608	7	FBgn0033906	FBtr0302452	CG8331	C;C	C	C	1	0.0296291	ReepB	Dmel	FBgn0033906	CG8331		NA	NA	1	NA	NA	0	1	0	0	0	0
2L	8068325	8068331	7	FBgn0011230	FBtr0079545	poe	C;C	C	C	0.534039	0.015907	poe	Dmel	FBgn0011230	CG14472		NA	NA	1	NA	NA	0	0	0	0	0	0
2R	18469600	18469606	7	FBgn0028496	FBtr0086721	CG30116	C;C	C	C	0.534039	0.0031816	CG30116	Dmel	FBgn0028496	CG30116	CG5512,CG17671	3	NA	1	1	NA	0	0	0	0	0	0
2R	10757359	10757365	7	FBgn0053144	FBtr0302517	CG33144	C;C	C	C	1	0.0667244	CG33144	Dmel	FBgn0053144	CG33144	CG12339,CG7621	NA	NA	1	NA	NA	0	1	0	0	1	0
X	7330110	7330116	7	FBgn0029945	FBtr0071051	CG18155	C;C	C	C	1	0.0066736	Acsf3	Dmel	FBgn0029945	CG18155		NA	NA	1	NA	NA	0	0	0	0	1	0
2R	24567832	24567838	7	FBgn0035025	FBtr0072308	uri	C;C	C	C	0.651555	0.0298527	uri	Dmel	FBgn0035025	CG11416		NA	NA	1	NA	NA	0	0	0	0	0	0
3L	1192062	1192068	7	FBgn0035187	FBtr0072638	Trh	C;C	C	C	1	0.0826925	Trh	Dmel	FBgn0035187	CG9122		NA	NA	1	NA	NA	0	0	0	0	0	0
2L	6758273	6758279	7	FBgn0031856	FBtr0290242	CG11322	C;C	C	C	0.534039	0.000918817	CG11322	Dmel	FBgn0031856	CG11322		NA	NA	1	NA	NA	0	0	0	0	0	0
X	147181	147187	7	FBgn0025835	FBtr0300673	CG17707	C;C	C	C	0.651555	0.00204914	CG17707	Dmel	FBgn0025835	CG17707		NA	NA	1	NA	NA	0	1	0	0	0	0
3L	7493344	7493350	7	FBgn0035790	FBtr0332140	Cyp316a1	C;C	C	C	0.534039	0.0705347	Cyp316a1	Dmel	FBgn0035790	CG8540		NA	NA	1	NA	NA	0	0	0	0	0	0
3L	7803323	7803329	7	FBgn0052369	FBtr0076783	CG32369	C;C	C	C	1	0.0378979	CG32369	Dmel	FBgn0052369	CG32369	CG7388,CG13684	NA	NA	1	NA	NA	0	0	0	0	0	0
3R	13784959	13784965	7	FBgn0000454	FBtr0082831	Dip-B	C;C	C	C	0.651555	0.00964259	Dip-B	Dmel	FBgn0000454	CG9285		NA	NA	1	NA	NA	0	0	0	0	0	0
2L	543506	543512	7	FBgn0031260	FBtr0078080	Spp	C;C	C	C	0.534039	0.0234358	Spp	Dmel	FBgn0031260	CG11840		NA	NA	1	NA	NA	0	1	0	0	0	0
2R	10054455	10054461	7	FBgn0010385	FBtr0088432	Def	C;C	C	C	0.651555	0.000961098	Def	Dmel	FBgn0010385	CG1385		NA	NA	1	NA	NA	0	0	0	0	0	0
2R	15383888	15383894	7	FBgn0026370	FBtr0087383	SRPK	C;C	C	C	0.651555	0.20556	SRPK	Dmel	FBgn0286813	CG8174		3	NA	1	1	NA	0	0	0	0	0	0
3L	17728625	17728631	7	FBgn0036747	FBtr0075195	CG6052	C;C	C	C	0.534039	0.0161263	CG6052	Dmel	FBgn0036747	CG6052		NA	NA	1	NA	NA	0	1	0	0	0	0
X	1333345	1333351	7	FBgn0024366	FBtr0070238	CG11409	C;C	C	C	0.534039	0.0582823	CG11409	Dmel	FBgn0024366	CG11409		NA	NA	1	NA	NA	0	0	0	0	0	0
3R	19856714	19856720	7	FBgn0261984	FBtr0113248	Ire1	C;C	C	C	0.534039	0.00304121	Ire1	Dmel	FBgn0261984	CG4583		NA	NA	1	NA	NA	0	1	0	0	0	0
3R	12709763	12709769	7	FBgn0002905	FBtr0082662	mus308	C;C	C	C	1	0.199002	PolQ	Dmel	FBgn0002905	CG6019		NA	NA	1	NA	NA	0	0	0	0	0	0
2R	15566581	15566587	7	FBgn0024754	FBtr0087351	Flo1	C;C	C	C	1	0.0427449	Flo1	Dmel	FBgn0024754	CG8200		NA	NA	1	NA	NA	0	0	0	0	0	0
2R	24041588	24041594	7	FBgn0034964	FBtr0072168	IntS1	C;C	C	C	0.534039	0.195283	IntS1	Dmel	FBgn0034964	CG3173		NA	NA	1	NA	NA	0	1	0	0	1	0
2R	16223734	16223740	7	FBgn0034093	FBtr0344080	CG15706	C;C	C	C	0.651555	0.0022966	CG15706	Dmel	FBgn0034093	CG15706		NA	5	1	NA	1	0	1	0	0	0	0
3L	14796301	14796307	7	FBgn0036451	FBtr0333075	CG9425	C;C	C	C	1	0.032261	Helz	Dmel	FBgn0036451	CG9425		NA	5	1	NA	1	1	0	0	0	0	0
2L	7806788	7806794	7	FBgn0031952	FBtr0343423	cdc14	C;C	C	C	1	0.0438653	cdc14	Dmel	FBgn0031952	CG7134		3	NA	1	1	NA	0	0	0	0	0	0
3R	21665743	21665749	7	FBgn0038894	FBtr0084113	CG15497	C;C	C	C	1	0.0257383	CG15497	Dmel	FBgn0038894	CG15497		NA	NA	1	NA	NA	0	0	0	0	0	0
X	17922543	17922549	7	FBgn0030884	FBtr0344233	CG6847	C;C	C	C	0.534039	0.058206	CG6847	Dmel	FBgn0030884	CG6847		NA	5	1	NA	1	0	0	0	0	0	0
2R	20875529	20875535	7	FBgn0050295	FBtr0332465	Ipk1	C;C	C	C	0.534039	0.000881259	Ipk1	Dmel	FBgn0050295	CG30295	CG15230,CG15229,CG15228	NA	NA	1	NA	NA	0	0	0	0	0	0
X	15347731	15347737	7	FBgn0030631	FBtr0074011	CG6227	C;C	C	C	1	0.0029625	Prp5	Dmel	FBgn0030631	CG6227		NA	NA	1	NA	NA	1	0	0	0	1	0
2R	7941332	7941338	7	FBgn0050379	FBtr0305125	CG30379	C;C	C	C	0.651555	0.135075	CG30379	Dmel	FBgn0050379	CG30379		NA	NA	1	NA	NA	0	1	0	0	0	0
3L	20009079	20009085	7	FBgn0261574	FBtr0332722	kug	C;C	C	C	0.651555	0.137804	kug	Dmel	FBgn0261574	CG7749		NA	NA	1	NA	NA	0	1	0	0	0	0
3L	1790648	1790654	7	FBgn0024510	FBtr0072790	dlt	C;C	C	C	0.651555	0.0330481	dlt	Dmel	FBgn0024510	CG32315	CG1977	NA	NA	1	NA	NA	0	0	0	0	0	0
2R	18183382	18183388	7	FBgn0034315	FBtr0086771	CG5721	C;C	C	C	0.651555	0.028374	CG5721	Dmel	FBgn0034315	CG5721		NA	NA	1	NA	NA	0	0	0	0	0	0
3L	8379930	8379936	7	FBgn0001253	FBtr0076606	ImpE1	C;C	C	C	1	0.0176033	ImpE1	Dmel	FBgn0001253	CG32356	CG7116,CG13668	NA	NA	1	NA	NA	0	0	0	0	0	0
X	10948037	10948043	7	FBgn0263705	FBtr0310333	Myo10A	C;C	C	C	1	0.00180701	Myo10A	Dmel	FBgn0263705	CG43657	CG2174,CG16922,CG2136	NA	NA	1	NA	NA	0	0	0	0	1	0
2R	24407500	24407506	7	FBgn0010414	FBtr0343316	SerT	C;C	C	C	1	0.056292	SerT	Dmel	FBgn0010414	CG4545		NA	NA	1	NA	NA	0	1	0	0	0	0
3R	4735308	4735314	7	FBgn0026620	FBtr0302613	tacc	C;C	C	C	0.534039	0.00793877	tacc	Dmel	FBgn0026620	CG9765		NA	NA	1	NA	NA	0	0	0	0	0	0
3R	24879372	24879378	7	FBgn0039241	FBtr0084710	CG11089	C;C	C	C	1	0.00138707	CG11089	Dmel	FBgn0039241	CG11089		NA	NA	1	NA	NA	0	0	0	0	0	0
2R	4608600	4608606	7	FBgn0260799	FBtr0111114	p120ctn	C;C	C	C	1	0.0662447	p120ctn	Dmel	FBgn0260799	CG17484		NA	NA	1	NA	NA	0	0	0	0	0	0
3L	7563111	7563117	7	FBgn0035798	FBtr0301221	frac	C;C	C	C	0.534039	0.00395541	frac	Dmel	FBgn0035798	CG7526		NA	NA	1	NA	NA	0	0	0	0	0	0
3L	18753209	18753215	7	FBgn0001078	FBtr0075086	ftz-f1	C;C	C	C	0.651555	0.282695	ftz-f1	Dmel	FBgn0001078	CG4059	CG13378	NA	5	1	NA	1	0	0	1	0	1	0
3R	26355814	26355820	7	FBgn0053970	FBtr0100013	CG33970	C;C	C	C	0.534039	0.0791647	osy	Dmel	FBgn0053970	CG33970	CG31085,CG14559,CG6162,CG6166	NA	NA	1	NA	NA	0	1	0	0	1	0
X	6044916	6044922	7	FBgn0029834	FBtr0305345	CG5937	C;C	C	C	0.534039	0.0279353	CG5937	Dmel	FBgn0029834	CG5937		NA	NA	1	NA	NA	0	0	0	0	0	0
2R	10282667	10282673	7	FBgn0033504	FBtr0336694	CAP	C;C	C	C	0.534039	0.00346472	CAP	Dmel	FBgn0033504	CG18408	CG18409,CG3451	3	NA	1	1	NA	0	0	0	0	0	0
3L	9006171	9006177	7	FBgn0035954	FBtr0076521	Doc3	C;C	C	C	0.534039	0.0491265	Doc3	Dmel	FBgn0035954	CG5093		NA	NA	1	NA	NA	0	0	1	0	0	0
X	5311486	5311492	7	FBgn0029752	FBtr0340478	TrxT	C;C	C	C	0.534039	0.432148	TrxT	Dmel	FBgn0029752	CG3315		NA	NA	1	NA	NA	0	0	0	0	0	0
2R	14514328	14514334	7	FBgn0050197	FBtr0087494	CG30197	C;C	C	C	0.651555	0.03154	CG30197	Dmel	FBgn0050197	CG30197		NA	NA	1	NA	NA	0	0	0	0	0	0
X	7853994	7854000	7	FBgn0029963	FBtr0071150	CG10920	C;C	C	C	0.534039	0.0101914	CG10920	Dmel	FBgn0029963	CG10920		NA	NA	1	NA	NA	0	0	0	0	0	0
2L	3528875	3528881	7	FBgn0031549	FBtr0301590	Spindly	C;C	C	C	0.534039	0.0299497	Spindly	Dmel	FBgn0031549	CG15415		3	NA	1	1	NA	0	0	0	0	0	0
3L	1531132	1531138	7	FBgn0053971	FBtr0100014	Ir62a	C;C	C	C	1	0.00343373	Ir62a	Dmel	FBgn0053971	CG33971	CG12090	NA	NA	1	NA	NA	0	1	0	0	0	0
X	7672710	7672716	7	FBgn0004198	FBtr0331733	ct	C;C	C	C	0.534039	0.00331315	ct	Dmel	FBgn0004198	CG11387		3	NA	1	1	NA	0	0	1	0	1	0
2R	6094567	6094573	7	FBgn0000546	FBtr0302439	EcR	C;C	C	C	0.534039	0.068771	EcR	Dmel	FBgn0000546	CG1765	CG8347	3	NA	1	1	NA	0	0	1	0	1	0
3L	19982428	19982434	7	FBgn0036923	FBtr0303781	CG17732	C;C	C	C	0.534039	0.240013	CG17732	Dmel	FBgn0036923	CG17732		NA	NA	1	NA	NA	0	0	0	0	0	0
2L	17991295	17991301	7	FBgn0051742	FBtr0081025	Prosbeta5R2	C;C	C	C	0.651555	0.0177561	Prosbeta5R2	Dmel	FBgn0051742	CG31742		NA	NA	1	NA	NA	0	0	0	0	0	0
3L	12764628	12764634	7	FBgn0052113	FBtr0273390	CG32113	C;C	C	C	0.534039	0.00133021	Vps13D	Dmel	FBgn0052113	CG32113	CG11003,CG11002	NA	NA	1	NA	NA	0	0	0	0	1	0
3R	21220457	21220463	7	FBgn0038870	FBtr0084050	Oga	C;C	C	C	0.651555	0.0503685	Oga	Dmel	FBgn0038870	CG5871		NA	NA	1	NA	NA	0	0	0	0	0	0
3R	23014704	23014710	7	FBgn0039038	FBtr0084343	CG6688	C;C	C	C	1	0.0433373	CG6688	Dmel	FBgn0039038	CG6688		NA	NA	1	NA	NA	0	0	0	0	0	0
2L	12059824	12059830	7	FBgn0027505	FBtr0080301	Rab3-GAP	C;C	C	C	1	0.00102669	Rab3-GAP	Dmel	FBgn0027505	CG7061		NA	NA	1	NA	NA	0	0	0	0	0	0
X	10753515	10753521	7	FBgn0030230	FBtr0071502	Rph	C;C	C	C	0.534039	0.0310558	Rph	Dmel	FBgn0030230	CG11556		3	5	1	1	1	0	0	0	0	0	0
2L	17528077	17528083	7	FBgn0032648	FBtr0303652	CG15144	C;C	C	C	0.651555	0.50795	CG15144	Dmel	FBgn0032648	CG15144		NA	NA	1	NA	NA	0	0	0	0	0	0
3L	6599251	6599257	7	FBgn0002926	FBtr0076984	ndl	C;C	C	C	1	0.114328	ndl	Dmel	FBgn0002926	CG10129		NA	NA	1	NA	NA	0	0	0	0	0	0
3L	21422563	21422569	7	FBgn0261258	FBtr0333386	rgn	C;C	C	C	0.651555	0.0249663	rgn	Dmel	FBgn0261258	CG6014		NA	NA	1	NA	NA	0	0	0	0	0	0
3L	4030976	4030982	7	FBgn0045477	FBtr0073196	Gr64c	C;C	C	C	1	0.0789897	Gr64c	Dmel	FBgn0045477	CG32256	CG14986	NA	NA	1	NA	NA	0	1	0	0	0	0
3L	9440809	9440815	7	FBgn0035993	FBtr0076504	Nf-YA	C;C	C	C	0.534039	0.01725	Nf-YA	Dmel	FBgn0035993	CG3891		NA	NA	1	NA	NA	0	0	1	0	0	0
3R	23252562	23252568	7	FBgn0039066	FBtr0084374	EloA	C;C	C	C	0.534039	0.00183944	EloA	Dmel	FBgn0039066	CG6755		3	NA	1	1	NA	0	1	0	0	0	0
3R	19257892	19257898	7	FBgn0038695	FBtr0346143	CG14280	C;C	C	C	0.534039	0.116283	CG14280	Dmel	FBgn0038695	CG14280		NA	5	1	NA	1	0	0	0	0	0	0
3R	24937421	24937427	7	FBgn0020626	FBtr0084801	Osbp	C;C	C	C	0.534039	0.0376549	Osbp	Dmel	FBgn0020626	CG6708		NA	NA	1	NA	NA	0	0	0	0	0	0
2L	9952827	9952833	7	FBgn0032168	FBtr0343747	CG13126	C;C	C	C	0.534039	0.0154903	CG13126	Dmel	FBgn0032168	CG13126		3	NA	1	1	NA	0	0	0	0	0	0
3R	22420762	22420768	7	FBgn0038964	FBtr0084230	Nop56	C;C	C	C	0.534039	0.0407053	Nop56	Dmel	FBgn0038964	CG13849		NA	NA	1	NA	NA	0	0	0	0	0	0
3L	5722409	5722415	7	FBgn0085447	FBtr0330122	sif	C;C	C	C	0.651555	0.0191839	sif	Dmel	FBgn0085447	CG34418	CG32414,CG5406,CG5256	3	NA	1	1	NA	0	1	0	0	0	0
3R	25894513	25894519	7	FBgn0039385	FBtr0084938	CG5913	C;C	C	C	0.534039	0.0220522	CG5913	Dmel	FBgn0039385	CG5913		NA	NA	1	NA	NA	0	0	0	0	0	0
3R	17494089	17494095	7	FBgn0261046	FBtr0330211	Dscam3	C;C	C	C	1	0.00182455	Dscam3	Dmel	FBgn0261046	CG31190	CG8106,CG12536	NA	NA	1	NA	NA	0	1	0	0	0	0
2R	15207279	15207285	7	FBgn0033998	FBtr0087402	row	C;C	C	C	0.534039	0.0139279	row	Dmel	FBgn0033998	CG8092		NA	NA	1	NA	NA	0	0	1	0	0	0
X	1473012	1473018	7	FBgn0025383	FBtr0070257	CG14780	C;C	C	C	0.534039	0.00366717	CG14780	Dmel	FBgn0025383	CG14780		NA	NA	1	NA	NA	0	0	0	0	0	0
2R	21555890	21555896	7	FBgn0003731	FBtr0071654	Egfr	C;C	C	C	1	0.00572859	Egfr	Dmel	FBgn0003731	CG10079		NA	NA	1	NA	NA	0	1	0	0	0	0
3R	18656934	18656940	7	FBgn0051224	FBtr0083691	CG31224	C;C	C	C	1	0.00186693	CG31224	Dmel	FBgn0051224	CG31224	CG7696,CG17796	NA	5	1	NA	1	0	0	1	0	0	0
3L	4401910	4401916	7	FBgn0035539	FBtr0073292	slow	C;C	C	C	1	0.0129799	slow	Dmel	FBgn0035539	CG7447		NA	NA	1	NA	NA	0	0	0	0	0	0
2L	8025885	8025891	7	FBgn0031975	FBtr0079534	Tg	C;C	C	C	0.534039	0.0171939	Tg	Dmel	FBgn0031975	CG7356		NA	NA	1	NA	NA	0	0	0	0	0	0
X	19567614	19567620	7	FBgn0000257	FBtr0074727	car	C;C	C	C	1	0.0148503	car	Dmel	FBgn0000257	CG12230		NA	NA	1	NA	NA	0	0	0	0	1	0
3R	10780347	10780353	7	FBgn0037832	FBtr0082274	Desi	C;C	C	C	1	0.000727617	Desi	Dmel	FBgn0037832	CG14686		NA	NA	1	NA	NA	0	1	0	0	0	0
3L	2268945	2268951	7	FBgn0052302	FBtr0072881	CG32302	C;C	C	C	0.651555	0.016028	CG32302	Dmel	FBgn0052302	CG32302	CG13805	NA	NA	1	NA	NA	0	0	0	0	0	0
2L	6662435	6662441	7	FBgn0031844	FBtr0079323	CG13771	C;C	C	C	0.651555	0.0337231	CG13771	Dmel	FBgn0031844	CG13771		3	NA	1	1	NA	0	0	0	0	0	0
2L	2849961	2849967	7	FBgn0031473	FBtr0077686	CG3104	C;C	C	C	1	0.0467418	CG3104	Dmel	FBgn0031473	CG3104		NA	NA	1	NA	NA	0	0	0	0	1	0
3R	17716378	17716384	7	FBgn0261885	FBtr0089582	osa	C;C	C	C	0.534039	0.00871576	osa	Dmel	FBgn0261885	CG7467		NA	NA	1	NA	NA	0	0	0	0	1	0
3L	3045890	3045896	7	FBgn0035390	FBtr0073005	scramb2	C;C	C	C	0.651555	0.0315182	scramb2	Dmel	FBgn0035390	CG1893		NA	NA	1	NA	NA	0	0	0	0	0	0
2L	356462	356468	7	FBgn0031250	FBtr0078094	Ent1	C;C	C	C	1	0.0648275	Ent1	Dmel	FBgn0031250	CG11907		NA	NA	1	NA	NA	0	1	0	0	0	0
3L	2608440	2608446	7	FBgn0011828	FBtr0072952	Pxn	C;C	C	C	0.534039	0.0148527	Pxn	Dmel	FBgn0011828	CG12002		NA	NA	1	NA	NA	0	0	0	0	1	0
3R	25311412	25311418	7	FBgn0051087	FBtr0335233	CG31087	C;C	C	C	1	0.176976	CG31087	Dmel	FBgn0051087	CG31087	CG10551	NA	NA	1	NA	NA	0	0	0	0	0	0
2L	12685088	12685094	7	FBgn0004394	FBtr0080392	pdm2	C;C	C	C	0.534039	0.00660293	pdm2	Dmel	FBgn0004394	CG12287	CG15487,CG15486	NA	NA	1	NA	NA	0	0	1	0	0	0
2R	6065999	6066005	7	FBgn0033058	FBtr0301687	CCHa2-R	C;C	C	C	0.534039	0.00596061	CCHa2-R	Dmel	FBgn0033058	CG14593	CG14594	NA	NA	1	NA	NA	0	1	0	0	0	0
X	17567847	17567853	7	FBgn0030844	FBtr0074491	ppk23	C;C	C	C	0.651555	0.00406036	ppk23	Dmel	FBgn0030844	CG8527		NA	NA	1	NA	NA	0	1	0	0	0	0
3R	21045378	21045384	7	FBgn0051189	FBtr0300817	CG31189	C;C	C	C	0.651555	0.0482357	CG31189	Dmel	FBgn0051189	CG31189	CG7096	NA	NA	1	NA	NA	0	0	0	0	0	0
3R	5566678	5566684	7	FBgn0037341	FBtr0078689	CG12746	C;C	C	C	0.651555	0.113498	CG12746	Dmel	FBgn0037341	CG12746		NA	NA	1	NA	NA	0	1	0	0	0	0
3R	24128575	24128581	7	FBgn0039153	FBtr0084584	GatB	C;C	C	C	1	0.0333559	GatB	Dmel	FBgn0039153	CG5463		NA	NA	1	NA	NA	0	0	0	0	1	0
2R	12638128	12638134	7	FBgn0011604	FBtr0087842	Iswi	C;C	C	C	1	0.0838407	Iswi	Dmel	FBgn0011604	CG8625		NA	NA	1	NA	NA	0	0	0	0	0	0
3L	4514962	4514968	7	FBgn0014073	FBtr0073323	Tie	C;C	C	C	1	0.00849535	Tie	Dmel	FBgn0014073	CG7525		NA	NA	1	NA	NA	0	1	0	0	0	0
3L	18299629	18299635	7	FBgn0036785	FBtr0299605	CG13700	C;C	C	C	0.651555	0.0110728	CG13700	Dmel	FBgn0036785	CG13700		NA	NA	1	NA	NA	0	0	0	0	0	0
2R	15945411	15945417	7	FBgn0034053	FBtr0114558	Cyp4aa1	C;C	C	C	1	0.0470837	Cyp4aa1	Dmel	FBgn0034053	CG8302		NA	NA	1	NA	NA	0	1	0	0	0	0
2L	19444376	19444382	7	FBgn0024230	FBtr0081288	Hs2st	C;C	C	C	0.534039	0.123223	Hs2st	Dmel	FBgn0024230	CG10234		NA	NA	1	NA	NA	0	0	0	0	0	0
X	4653914	4653920	7	FBgn0029719	FBtr0070689	CG15473	C;C	C	C	0.651555	0.00633742	CG15473	Dmel	FBgn0029719	CG15473		NA	NA	1	NA	NA	0	0	0	0	0	0
3L	8592219	8592225	7	FBgn0262508	FBtr0304812	CG43078	C;C	C	C	0.534039	0.0240892	CG43078	Dmel	FBgn0262508	CG43078	CG32352,CG32353,CG32355,CG17926,CG6239	NA	NA	1	NA	NA	0	1	0	0	0	0
3R	23721107	23721113	7	FBgn0039108	FBtr0345300	CG10232	C;C	C	C	0.534039	0.0809547	CG10232	Dmel	FBgn0039108	CG10232		NA	NA	1	NA	NA	0	0	0	0	0	0
3L	20470912	20470918	7	FBgn0052428	FBtr0300452	CG32428	C;C	C	C	0.651555	0.00238232	CG32428	Dmel	FBgn0052428	CG32428	CG5145,CG13249	NA	NA	1	NA	NA	0	0	0	0	0	0
2R	21010909	21010915	7	FBgn0001133	FBtr0071548	grau	C;C	C	C	0.534039	0.0191579	grau	Dmel	FBgn0001133	CG33133	CG3282	NA	NA	1	NA	NA	0	0	1	0	0	0
X	11074911	11074917	7	FBgn0003366	FBtr0073393	sev	C;C	C	C	1	0.0264168	sev	Dmel	FBgn0003366	CG18085		NA	NA	1	NA	NA	0	1	0	0	0	0
2R	22667630	22667636	7	FBgn0050273	FBtr0346948	CG30273	C;C	C	C	0.651555	0.0260632	CG30273	Dmel	FBgn0050273	CG30273	CG13515	3	NA	1	1	NA	0	0	0	0	0	0
2R	16100524	16100530	7	FBgn0034073	FBtr0087255	CG8414	C;C	C	C	1	0.102372	CG8414	Dmel	FBgn0034073	CG8414		NA	NA	1	NA	NA	0	0	0	0	1	0
3R	20228041	20228047	7	FBgn0083975	FBtr0301074	Nlg4	C;C	C	C	0.651555	0.0793199	Nlg4	Dmel	FBgn0083975	CG34139	CG5030,CG31499,CG31209,CG5035,CG15683,CG15682	NA	NA	1	NA	NA	0	1	0	0	0	0
X	13191009	13191015	7	FBgn0030459	FBtr0073738	CG12723	C;C	C	C	1	0.010737	CG12723	Dmel	FBgn0030459	CG12723		NA	NA	1	NA	NA	0	0	0	0	0	0
2R	12329574	12329580	7	FBgn0264560	FBtr0087897	garz	C;C	C	C	0.651555	0.0054597	garz	Dmel	FBgn0264560	CG8487		NA	NA	1	NA	NA	0	0	0	0	1	0
2L	21487881	21487887	7	FBgn0053888	FBtr0091892	His2B:CG33888	C;C	C	C	0.534039	0.0633356	His2B:CG33888	Dmel	FBgn0053888	CG33888		NA	NA	1	NA	NA	0	0	0	0	0	0
X	16680010	16680016	7	FBgn0261245	FBtr0074318	sing	C;C	C	C	1	0.00194782	sing	Dmel	FBgn0261245	CG13011		NA	NA	1	NA	NA	0	1	0	0	1	0
3L	8994854	8994860	7	FBgn0016070	FBtr0076549	smg	C;C	C	C	0.651555	0.00959325	smg	Dmel	FBgn0016070	CG5263		NA	NA	1	NA	NA	1	0	0	0	0	0
3R	27124314	27124320	7	FBgn0039491	FBtr0085130	CG6059	C;C	C	C	1	0.024799	CG6059	Dmel	FBgn0039491	CG6059		NA	NA	1	NA	NA	0	0	0	0	0	0
3R	20671926	20671932	7	FBgn0038819	FBtr0083919	Cpr92F	C;C	C	C	0.534039	0.0771347	Cpr92F	Dmel	FBgn0038819	CG5494		NA	NA	1	NA	NA	0	0	0	0	0	0
3R	31459502	31459508	7	FBgn0039848	FBtr0085810	lox	C;C	C	C	0.534039	0.0148103	Loxl1	Dmel	FBgn0039848	CG11335		NA	NA	1	NA	NA	0	0	0	0	0	0
2L	2551714	2551720	7	FBgn0031431	FBtr0077750	CG3515	C;C	C	C	1	0.020899	CG3515	Dmel	FBgn0031431	CG3515		NA	NA	1	NA	NA	0	0	0	0	0	0
3R	5787840	5787846	7	FBgn0037376	FBtr0078669	Hat1	C;C	C	C	0.651555	0.0591764	Hat1	Dmel	FBgn0037376	CG2051		NA	NA	1	NA	NA	0	0	0	0	0	0
3R	22739346	22739352	7	FBgn0039016	FBtr0084324	Dcr-1	C;C	C	C	0.651555	0.036096	Dcr-1	Dmel	FBgn0039016	CG4792		NA	NA	1	NA	NA	1	0	0	0	0	0
3L	21028462	21028468	7	FBgn0037044	FBtr0345136	CG10585	C;C	C	C	0.534039	0.267632	Pdss2	Dmel	FBgn0037044	CG10585		NA	NA	1	NA	NA	0	0	0	0	1	0
3R	18254666	18254672	7	FBgn0263738	FBtr0310382	Ada2a	C;C	C	C	0.534039	0.0425059	Ada2a	Dmel	FBgn0263738	CG43663	CG7150,CG31318,CG33520	NA	NA	1	NA	NA	0	0	0	0	1	0
3R	17408749	17408755	7	FBgn0038505	FBtr0083437	CG17283	C;C	C	C	0.651555	0.00689174	CG17283	Dmel	FBgn0038505	CG17283		NA	5	1	NA	1	0	0	0	0	0	0
3L	4688182	4688188	7	FBgn0035567	FBtr0073367	CG7514	C;C	C	C	1	0.163212	CG7514	Dmel	FBgn0035567	CG7514		NA	NA	1	NA	NA	0	1	0	0	0	0
2R	16280280	16280286	7	FBgn0034103	FBtr0087136	prim	C;C	C	C	0.651555	0.180673	prim	Dmel	FBgn0034103	CG15704		NA	NA	1	NA	NA	0	0	0	0	0	0
3R	14111890	14111896	7	FBgn0038204	FBtr0301280	CG14357	C;C	C	C	0.651555	0.00460913	CG14357	Dmel	FBgn0038204	CG14357		NA	NA	1	NA	NA	0	0	0	0	0	0
2R	14755000	14755006	7	FBgn0033960	FBtr0087472	CG10151	C;C	C	C	0.534039	0.0393696	CG10151	Dmel	FBgn0033960	CG10151		NA	NA	1	NA	NA	0	0	0	0	0	0
X	4219122	4219128	7	FBgn0029697	FBtr0070645	CG15570	C;C	C	C	0.534039	0.00733824	CG15570	Dmel	FBgn0029697	CG15570		NA	NA	1	NA	NA	0	0	0	0	0	0
X	9168944	9168950	7	FBgn0026206	FBtr0333475	mei-P26	C;C	C	C	0.534039	0.0405097	mei-P26	Dmel	FBgn0026206	CG12218		3	NA	1	1	NA	0	0	0	0	0	0
2L	2492013	2492019	7	FBgn0264978	FBtr0335169	Slh	C;C	C	C	1	0.594746	Slh	Dmel	FBgn0264978	CG3539	CG15393	3	NA	1	1	NA	0	0	0	0	1	0
3L	12153267	12153273	7	FBgn0013997	FBtr0075999	Nrx-IV	C;C	C	C	0.534039	0.132724	Nrx-IV	Dmel	FBgn0013997	CG6827	CG682	NA	NA	1	NA	NA	0	1	0	0	0	0
3R	25960710	25960716	7	FBgn0039398	FBtr0084948	CG14540	C;C	C	C	0.651555	0.270897	CG14540	Dmel	FBgn0039398	CG14540		NA	NA	1	NA	NA	0	0	0	0	0	0
X	10459427	10459433	7	FBgn0030204	FBtr0071462	Or9a	C;C	C	C	0.534039	0.0628463	Or9a	Dmel	FBgn0030204	CG15302		NA	NA	1	NA	NA	0	1	0	0	0	0
3R	10399090	10399096	7	FBgn0259938	FBtr0305152	cwo	C;C	C	C	0.534039	0.00925286	cwo	Dmel	FBgn0259938	CG17100		3	NA	1	1	NA	0	0	1	0	1	0
2R	14857244	14857250	7	FBgn0033973	FBtr0087449	HPS1	C;C	C	C	0.534039	0.00169601	HPS1	Dmel	FBgn0033973	CG12855		NA	NA	1	NA	NA	0	0	0	0	0	0
3R	11434782	11434788	7	FBgn0037901	FBtr0082402	CG6744	C;C	C	C	0.534039	0.27662	Exd2	Dmel	FBgn0037901	CG6744		NA	NA	1	NA	NA	0	1	0	0	0	0
2L	7884331	7884337	7	FBgn0031961	FBtr0343419	CG7102	C;C	C	C	1	0.0558979	CG7102	Dmel	FBgn0031961	CG7102	CG17973	NA	NA	1	NA	NA	0	0	0	0	0	0
2L	6957912	6957918	7	FBgn0031875	FBtr0079350	CG3430	C;C	C	C	1	0.0168444	CG3430	Dmel	FBgn0031875	CG3430		NA	NA	1	NA	NA	0	0	0	0	0	0
3R	23485046	23485052	7	FBgn0039079	FBtr0273202	Ir94g	C;C	C	C	1	0.158812	Ir94g	Dmel	FBgn0039079	CG17381		NA	NA	1	NA	NA	0	1	0	0	0	0
3R	20583607	20583613	7	FBgn0038809	FBtr0300803	CG16953	C;C	C	C	1	0.0182847	CG16953	Dmel	FBgn0038809	CG16953		NA	NA	1	NA	NA	0	1	0	0	0	0
3R	19129084	19129090	7	FBgn0038679	FBtr0083729	CG6040	C;C	C	C	0.534039	0.0595198	CG6040	Dmel	FBgn0038679	CG6040		NA	NA	1	NA	NA	0	0	0	0	0	0
3R	5636228	5636234	7	FBgn0051548	FBtr0078736	CG31548	C;C	C	C	1	0.0129016	CG31548	Dmel	FBgn0051548	CG31548	CG2907	NA	NA	1	NA	NA	0	0	0	0	0	0
3R	15793084	15793090	7	FBgn0038363	FBtr0334591	Acyp2	C;C	C	C	0.651555	0.0419012	Acyp2	Dmel	FBgn0038363	CG18505		NA	NA	1	NA	NA	0	0	0	0	0	0
3R	17444843	17444849	7	FBgn0038511	FBtr0083442	cysu	C;C	C	C	1	0.0131098	cysu	Dmel	FBgn0038511	CG5873		3	NA	1	1	NA	0	0	0	0	0	0
3R	11239420	11239426	7	FBgn0051388	FBtr0082356	CG31388	C;C	C	C	0.534039	0.0174609	CG31388	Dmel	FBgn0051388	CG31388	CG5135,CG17722	3	NA	1	1	NA	0	0	1	0	0	0
2L	4689791	4689797	7	FBgn0031622	FBtr0077422	CG3251	C;C	C	C	1	0.178872	CG3251	Dmel	FBgn0031622	CG3251		NA	NA	1	NA	NA	0	0	0	0	1	0
2L	19034000	19034006	7	FBgn0051800	FBtr0081179	CG31800	C;C	C	C	0.534039	0.392668	CG31800	Dmel	FBgn0051800	CG31800		NA	NA	1	NA	NA	0	0	0	0	1	0
3R	22293057	22293063	7	FBgn0051163	FBtr0305036	SKIP	C;C	C	C	0.651555	0.00935484	SKIP	Dmel	FBgn0051163	CG31163	CG7087,CG7086,CG5736,CG13864,CG13863	NA	5	1	NA	1	0	0	0	0	0	0
2L	6008760	6008766	7	FBgn0031762	FBtr0332602	CG9098	C;C	C	C	1	0.0229656	CG9098	Dmel	FBgn0031762	CG9098		NA	NA	1	NA	NA	0	0	0	0	0	0
3R	20639955	20639961	7	FBgn0038816	FBtr0334641	Lrrk	C;C	C	C	1	0.00616056	Lrrk	Dmel	FBgn0038816	CG5483		NA	5	1	NA	1	0	0	0	0	0	0
2R	20551137	20551143	7	FBgn0034518	FBtr0100495	CG13430	C;C	C	C	1	0.00434854	CG13430	Dmel	FBgn0034518	CG13430	CG33008	NA	NA	1	NA	NA	0	0	0	0	0	0
2L	10137165	10137171	7	FBgn0265002	FBtr0335509	CG44153	C;C	C	C	0.534039	0.0345459	CG44153	Dmel	FBgn0265002	CG44153	CG31714,CG13136,CG34048,CG13134,CG42843,CG5833,CG13132	NA	NA	1	NA	NA	0	1	0	0	0	0
3R	11630264	11630270	7	FBgn0037924	FBtr0082418	CG14712	C;C	C	C	0.534039	0.0488905	CG14712	Dmel	FBgn0037924	CG14712		NA	NA	1	NA	NA	0	0	0	0	0	0
2L	2969525	2969531	7	FBgn0024920	FBtr0343784	Ts	C;C	C	C	0.534039	0.0152462	Ts	Dmel	FBgn0024920	CG3181		NA	NA	1	NA	NA	0	0	0	0	0	0
3R	9816621	9816627	7	FBgn0037763	FBtr0082154	CG16904	C;C	C	C	1	0.00641306	CG16904	Dmel	FBgn0037763	CG16904		NA	NA	1	NA	NA	0	1	0	0	0	0
2R	18162920	18162926	7	FBgn0034308	FBtr0345416	CG10915	C;C	C	C	0.534039	0.00708768	Naus	Dmel	FBgn0034308	CG10915		NA	NA	1	NA	NA	0	0	0	0	0	0
4	569145	569151	7	FBgn0039909	FBtr0089105	ND-49	C;C	C	C	1	0.0184623	ND-49	Dmel	FBgn0039909	CG1970		NA	NA	1	NA	NA	0	0	0	0	1	0
X	8098795	8098801	7	FBgn0029997	FBtr0340140	CG2258	C;C	C	C	0.534039	0.0155829	CG2258	Dmel	FBgn0029997	CG2258		NA	NA	1	NA	NA	0	0	0	0	0	0
3R	24357050	24357056	7	FBgn0039188	FBtr0084629	Golgin84	C;C	C	C	0.534039	0.0275284	Golgin84	Dmel	FBgn0039188	CG17785		NA	NA	1	NA	NA	0	1	0	0	0	0
2R	23124425	23124431	7	FBgn0034824	FBtr0071975	Klp59C	C;C	C	C	0.651555	0.0061533	Klp59C	Dmel	FBgn0034824	CG3219		NA	NA	1	NA	NA	0	0	0	0	0	0
X	15294469	15294475	7	FBgn0030625	FBtr0074001	CG5877	C;C	C	C	0.534039	5.97546e-05	CG5877	Dmel	FBgn0030625	CG5877		NA	NA	1	NA	NA	0	0	0	0	0	0
3L	2500073	2500079	7	FBgn0035348	FBtr0306577	CG16758	C;C	C	C	0.651555	0.000734125	CG16758	Dmel	FBgn0035348	CG16758	CG16760	NA	NA	1	NA	NA	0	0	0	0	0	0
2R	13230888	13230894	7	FBgn0033813	FBtr0087742	fsd	C;C	C	C	0.534039	0.045404	fsd	Dmel	FBgn0033813	CG12765		NA	NA	1	NA	NA	0	0	0	0	0	0
X	5606433	5606439	7	FBgn0263511	FBtr0070781	Vsx1	C;C	C	C	0.534039	0.0352048	Vsx1	Dmel	FBgn0263511	CG4136		NA	NA	1	NA	NA	0	0	1	0	0	0
3R	26022327	26022333	7	FBgn0002609	FBtr0084958	E(spl)m3-HLH	C;C	C	C	1	0.0171412	E(spl)m3-HLH	Dmel	FBgn0002609	CG8346		NA	NA	1	NA	NA	0	0	1	0	0	0
2R	13552189	13552195	7	FBgn0053156	FBtr0087682	CG33156	C;C	C	C	1	0.0329367	CG33156	Dmel	FBgn0053156	CG33156	CG30063,CG6152	NA	5	1	NA	1	0	0	0	0	0	0
2R	20276978	20276984	7	FBgn0034496	FBtr0086304	CG9143	C;C	C	C	1	0.0029621	CG9143	Dmel	FBgn0287774	CG9143		NA	NA	1	NA	NA	1	0	0	0	0	0
2L	3024872	3024878	7	FBgn0031492	FBtr0077648	CG3542	C;C	C	C	0.651555	0.0110023	Prp40	Dmel	FBgn0031492	CG3542		NA	NA	1	NA	NA	0	0	0	0	1	0
2L	8864071	8864077	7	FBgn0052987	FBtr0079735	CG32987	C;C	C	C	1	0.0610449	CG32987	Dmel	FBgn0052987	CG32987	CG15866	NA	NA	1	NA	NA	0	1	0	0	0	0
X	17701095	17701101	7	FBgn0030863	FBtr0340633	CG8188	C;C	C	C	0.534039	0.0592274	CG8188	Dmel	FBgn0030863	CG8188		NA	NA	1	NA	NA	0	0	0	0	0	0
3R	14300945	14300951	7	FBgn0285913	FBtr0082923	red	C;C	C	C	0.651555	0.194315	red	Dmel	FBgn0285913	CG12207		NA	NA	1	NA	NA	0	0	0	0	0	0
3R	25282280	25282286	7	FBgn0039313	FBtr0089644	CG11892	C;C	C	C	1	0.0688975	CG11892	Dmel	FBgn0039313	CG11892		NA	NA	1	NA	NA	0	0	0	0	0	0
2R	20537308	20537314	7	FBgn0034513	FBtr0086217	CG13423	C;C	C	C	0.534039	0.0186039	CG13423	Dmel	FBgn0034513	CG13423		NA	NA	1	NA	NA	0	0	0	0	0	0
X	5175682	5175688	7	FBgn0029746	FBtr0344669	CG15465	C;C	C	C	1	0.166651	CG15465	Dmel	FBgn0029746	CG15465		3	NA	1	1	NA	0	0	0	0	0	0
3R	24366669	24366675	7	FBgn0261993	FBtr0303823	CG42811	C;C	C	C	0.651555	0.0119902	CG42811	Dmel	FBgn0261993	CG42811	CG18669	NA	NA	1	NA	NA	0	0	0	0	0	0
2L	238788	238794	7	FBgn0266557	FBtr0308253	kis	C;C	C	C	1	0.0142303	kis	Dmel	FBgn0266557	CG3696	CG3660,CG18326	NA	NA	1	NA	NA	0	0	0	0	1	0
X	16887755	16887761	7	FBgn0030803	FBtr0310519	CG4880	C;C	C	C	0.534039	0.093652	CG4880	Dmel	FBgn0030803	CG4880		NA	NA	1	NA	NA	0	1	0	0	0	0
2R	22642479	22642485	7	FBgn0040091	FBtr0071934	Ugt58Fa	C;C	C	C	0.534039	0.0549106	Ugt317A1	Dmel	FBgn0040091	CG4414		NA	NA	1	NA	NA	0	1	0	0	0	0
X	3175981	3175987	7	FBgn0040396	FBtr0070508	CG3939	C;C	C	C	0.651555	0.0352984	CG3939	Dmel	FBgn0040396	CG3939		NA	NA	1	NA	NA	0	0	0	0	0	0
2L	21433348	21433354	7	FBgn0053906	FBtr0091910	His2B:CG33906	C;C	C	C	0.534039	0.0633356	His2B:CG33906	Dmel	FBgn0053906	CG33906		NA	NA	1	NA	NA	0	0	0	0	0	0
2L	5801798	5801804	7	FBgn0031739	FBtr0079160	CG14005	C;C	C	C	1	0.0225568	CG14005	Dmel	FBgn0031739	CG14005		NA	NA	1	NA	NA	0	0	0	0	0	0
2R	12353995	12354001	7	FBgn0050047	FBtr0087905	CG30047	C;C	C	C	0.651555	0.0669617	CG30047	Dmel	FBgn0050047	CG30047		NA	NA	1	NA	NA	0	1	0	0	0	0
3L	17756375	17756381	7	FBgn0043025	FBtr0075192	Adgf-A2	C;C	C	C	0.534039	0.0634889	Adgf-A2	Dmel	FBgn0043025	CG32178		NA	NA	1	NA	NA	0	1	0	0	0	0
2L	814757	814763	7	FBgn0031281	FBtr0332974	Saf6	C;C	C	C	0.534039	0.00466585	Saf6	Dmel	FBgn0031281	CG3883		NA	NA	1	NA	NA	0	0	0	0	0	0
3L	11988692	11988698	7	FBgn0036235	FBtr0290131	CG6938	C;C	C	C	0.534039	0.111893	CG6938	Dmel	FBgn0036235	CG6938		NA	NA	1	NA	NA	0	1	0	0	0	0
4	372382	372388	7	FBgn0039904	FBtr0089126	Hcf	C;C	C	C	0.651555	0.00276858	Hcf	Dmel	FBgn0039904	CG1710		3	NA	1	1	NA	0	0	0	0	0	0
2R	16671396	16671402	7	FBgn0085486	FBtr0112763	CG34457	C;C	C	C	1	0.00794443	CG34457	Dmel	FBgn0085486	CG34457	CG5197	NA	NA	1	NA	NA	0	0	0	0	0	0
X	1028966	1028972	7	FBgn0026143	FBtr0070182	CDC45L	C;C	C	C	1	0.00107455	Cdc45	Dmel	FBgn0026143	CG3658		NA	NA	1	NA	NA	0	0	0	0	0	0
2R	7017196	7017202	7	FBgn0029506	FBtr0336871	Tsp42Ee	C;C	C	C	0.651555	0.0182343	Tsp42Ee	Dmel	FBgn0029506	CG10106		NA	NA	1	NA	NA	0	1	0	0	0	0
X	15755537	15755543	7	FBgn0030685	FBtr0340307	Graf	C;C	C	C	0.651555	0.0769336	Graf	Dmel	FBgn0030685	CG8948		NA	5	1	NA	1	0	0	0	0	0	0
2R	8663611	8663617	7	FBgn0003892	FBtr0089427	ptc	C;C	C	C	0.534039	0.00810448	ptc	Dmel	FBgn0003892	CG2411		NA	NA	1	NA	NA	0	1	0	0	0	0
3R	26943618	26943624	7	FBgn0285963	FBtr0472696	CG46339	C;C	C	C	0.651555	0.056758	CG46339	Dmel	FBgn0285963	CG46339	CG5518	NA	NA	1	NA	NA	0	1	0	0	0	0
3R	5635388	5635394	7	FBgn0051546	FBtr0078737	CG31546	C;C	C	C	0.651555	0.0791707	CG31546	Dmel	FBgn0051546	CG31546	CG2907	NA	NA	1	NA	NA	0	0	0	0	0	0
X	4802552	4802558	7	FBgn0029728	FBtr0332313	CG2861	C;C	C	C	1	0.0242361	CG2861	Dmel	FBgn0029728	CG2861		NA	NA	1	NA	NA	0	1	0	0	0	0
2R	20322813	20322819	7	FBgn0027529	FBtr0301207	tapas	C;C	C	C	1	0.0779282	tapas	Dmel	FBgn0027529	CG8920		NA	NA	1	NA	NA	0	0	0	0	0	0
2R	14868077	14868083	7	FBgn0264962	FBtr0339985	Pcf11	C;C	C	C	1	0.00377607	Pcf11	Dmel	FBgn0264962	CG10228		NA	NA	1	NA	NA	1	0	0	0	1	0
X	20514149	20514155	7	FBgn0031119	FBtr0077312	CG1812	C;C	C	C	0.534039	0.0182532	CG1812	Dmel	FBgn0031119	CG1812		NA	NA	1	NA	NA	0	0	0	0	0	0
2L	7730519	7730525	7	FBgn0031939	FBtr0079505	CG13796	C;C	C	C	1	0.110889	CG13796	Dmel	FBgn0031939	CG13796	CG18590	NA	NA	1	NA	NA	0	1	0	0	0	0
3R	4467880	4467886	7	FBgn0051523	FBtr0345142	CG31523	C;C	C	C	1	0.0043183	CG31523	Dmel	FBgn0051523	CG31523	CG9798	NA	5	1	NA	1	0	1	0	0	0	0
3R	17404895	17404901	7	FBgn0262005	FBtr0303831	CG42823	C;C	C	C	0.651555	0.0367601	CG42823	Dmel	FBgn0262005	CG42823	CG34053	NA	NA	1	NA	NA	0	0	0	0	0	0
X	18089433	18089439	7	FBgn0030892	FBtr0089576	CG7206	C;C	C	C	0.534039	0.0113055	CG7206	Dmel	FBgn0030892	CG7206		3	NA	1	1	NA	0	0	0	0	0	0
3L	23786252	23786258	7	FBgn0264699	FBtr0333915	CG43968	C;C	C	C	0.651555	0.00634723	CG43968	Dmel	FBgn0264699	CG43968		NA	NA	1	NA	NA	0	0	0	0	0	0
2L	20095659	20095665	7	FBgn0032848	FBtr0081335	nesd	C;C	C	C	1	0.00444256	nesd	Dmel	FBgn0032848	CG10722		NA	NA	1	NA	NA	0	0	0	0	0	0
2R	12398403	12398409	7	FBgn0050048	FBtr0332424	CG30048	C;C	C	C	0.651555	0.0811946	CG30048	Dmel	FBgn0050048	CG30048		NA	NA	1	NA	NA	0	1	0	0	0	0
2R	14464474	14464480	7	FBgn0284250	FBtr0302927	Oaz	C;C	C	C	1	0.0320968	L	Dmel	FBgn0288433	CG42702	CG10109,CG17390,CG17388,CG17389	NA	NA	1	NA	NA	0	0	1	0	0	0
X	7724183	7724189	7	FBgn0022786	FBtr0071070	Hira	C;C	C	C	0.534039	0.00201111	Hira	Dmel	FBgn0022786	CG12153		NA	NA	1	NA	NA	0	0	0	0	0	0
3R	25891129	25891135	7	FBgn0028717	FBtr0084935	Lnk	C;C	C	C	1	0.0683698	Lnk	Dmel	FBgn0028717	CG17367	CG5908	NA	NA	1	NA	NA	0	0	0	0	1	0
3L	15007941	15007947	7	FBgn0036463	FBtr0333876	Reck	C;C	C	C	0.534039	0.00853119	Reck	Dmel	FBgn0036463	CG5392		NA	NA	1	NA	NA	0	0	0	0	0	0
2R	9474346	9474352	7	FBgn0259234	FBtr0339382	Camta	C;C	C	C	0.534039	0.0325998	Camta	Dmel	FBgn0287478	CG42332	CG8809,CG13952,CG13953	NA	NA	1	NA	NA	0	0	1	0	0	0
2L	7471709	7471715	7	FBgn0031918	FBtr0330720	CG6055	C;C	C	C	0.534039	0.0161022	CG6055	Dmel	FBgn0031918	CG6055		NA	NA	1	NA	NA	0	0	0	0	0	0
2L	21523001	21523007	7	FBgn0053874	FBtr0091878	His2B:CG33874	C;C	C	C	0.534039	0.0633356	His2B:CG33874	Dmel	FBgn0053874	CG33874		NA	NA	1	NA	NA	0	0	0	0	0	0
X	495694	495700	7	FBgn0023534	FBtr0340145	CG17778	C;C	C	C	0.534039	0.027561	CG17778	Dmel	FBgn0023534	CG17778		NA	NA	1	NA	NA	0	0	0	0	0	0
3L	16777742	16777748	7	FBgn0036660	FBtr0333610	CG13025	C;C	C	C	0.651555	0.0110171	mus302	Dmel	FBgn0287696	CG13025		NA	NA	1	NA	NA	0	0	0	0	0	0
2L	17179001	17179007	7	FBgn0045486	FBtr0080963	Gr36b	C;C	C	C	0.651555	0.0621688	Gr36b	Dmel	FBgn0045486	CG31744	CG15137	NA	NA	1	NA	NA	0	1	0	0	0	0
2R	10877085	10877091	7	FBgn0263510	FBtr0088228	nclb	C;C	C	C	1	0.0169016	nclb	Dmel	FBgn0263510	CG6751		NA	NA	1	NA	NA	0	0	0	0	1	0
3L	1958693	1958699	7	FBgn0265988	FBtr0304060	mv	C;C	C	C	0.534039	0.0227431	mv	Dmel	FBgn0288310	CG42863	CG11814,CG5691	NA	NA	1	NA	NA	0	0	0	0	0	0
2L	21457498	21457504	7	FBgn0053900	FBtr0091904	His2B:CG33900	C;C	C	C	0.534039	0.0633356	His2B:CG33900	Dmel	FBgn0053900	CG33900		NA	NA	1	NA	NA	0	0	0	0	0	0
X	308778	308784	7	FBgn0040371	FBtr0070069	CG12470	C;C	C	C	1	0.0542601	CG12470	Dmel	FBgn0040371	CG12470		NA	NA	1	NA	NA	0	0	0	0	0	0
3L	9650996	9651002	7	FBgn0053696	FBtr0091684	CNMaR	C;C	C	C	0.534039	0.135302	CNMaR	Dmel	FBgn0053696	CG33696	CG32047,CG16726	NA	NA	1	NA	NA	0	1	0	0	0	0
3R	28883945	28883951	7	FBgn0027578	FBtr0336460	CG14526	C;C	C	C	0.534039	0.0569789	Nepl21	Dmel	FBgn0027578	CG14526		NA	NA	1	NA	NA	0	0	0	0	0	0
X	10917445	10917451	7	FBgn0264502	FBtr0332933	CG43901	C;C	C	C	0.534039	0.0169241	CG43901	Dmel	FBgn0264502	CG43901	CG11203,CG15207	3	NA	1	1	NA	0	0	0	0	0	0
3R	13379039	13379045	7	FBgn0038143	FBtr0082766	CG9813	C;C	C	C	0.651555	0.0516034	CG9813	Dmel	FBgn0038143	CG9813		NA	NA	1	NA	NA	0	0	0	0	1	0
2L	9710813	9710819	7	FBgn0032138	FBtr0079848	CG4364	C;C	C	C	0.651555	0.0220758	CG4364	Dmel	FBgn0032138	CG4364		NA	NA	1	NA	NA	0	0	0	0	1	0
3L	16097416	16097422	7	FBgn0036567	FBtr0075496	CG13074	C;C	C	C	0.534039	0.0411989	CG13074	Dmel	FBgn0036567	CG13074		3	NA	1	1	NA	0	0	0	0	0	0
3L	7893494	7893500	7	FBgn0052365	FBtr0076746	CG32365	C;C	C	C	1	0.0315724	CG32365	Dmel	FBgn0052365	CG32365	CG13683,CG8294,CG13682	NA	NA	1	NA	NA	0	0	0	0	0	0
3L	21432253	21432259	7	FBgn0053288	FBtr0301013	CG33288	C;C	C	C	1	0.00114748	CG33288	Dmel	FBgn0053288	CG33288		NA	NA	1	NA	NA	0	0	0	0	0	0
3R	5710061	5710067	7	FBgn0261261	FBtr0334947	plx	C;C	C	C	0.534039	0.0508119	plx	Dmel	FBgn0261261	CG42612	CG1093,CG14674,CG34122	NA	NA	1	NA	NA	0	0	0	0	1	0
3R	9563010	9563016	7	FBgn0037710	FBtr0082113	CG9393	C;C	C	C	1	0.266732	CG9393	Dmel	FBgn0037710	CG9393		NA	NA	1	NA	NA	0	1	0	0	0	0
X	9607975	9607981	7	FBgn0027084	FBtr0071366	LysRS	C;C	C	C	1	0.00579161	LysRS	Dmel	FBgn0027084	CG12141		NA	NA	1	NA	NA	0	0	0	0	0	0
X	16432018	16432024	7	FBgn0026575	FBtr0290069	hang	C;C	C	C	0.651555	0.195598	hang	Dmel	FBgn0026575	CG32575	CG4416,CG4411	NA	NA	1	NA	NA	0	0	1	0	0	0
X	2490783	2490789	7	FBgn0284408	FBtr0342811	trol	C;C	C	C	0.651555	0.0313569	trol	Dmel	FBgn0284408	CG33950	CG7981,CG12497,CG33675	3	NA	1	1	NA	0	1	0	0	0	0
X	15094689	15094695	7	FBgn0030613	FBtr0307207	Rab3-GEF	C;C	C	C	0.651555	0.00731504	Rab3-GEF	Dmel	FBgn0030613	CG5627		NA	NA	1	NA	NA	0	1	0	0	0	0
3R	21742586	21742592	7	FBgn0038897	FBtr0084125	CG5849	C;C	C	C	1	0.00207804	CG5849	Dmel	FBgn0038897	CG5849		NA	NA	1	NA	NA	0	0	0	0	0	0
2R	1.93429e+07	1.9343e+07	7	FBgn0034435	FBtr0086518	fest	C;C	C	C	1	0.196343	fest	Dmel	FBgn0034435	CG9975		3	NA	1	1	NA	0	0	0	0	1	0
3L	7143894	7143900	7	FBgn0259173	FBtr0299641	corn	C;C	C	C	1	0.00345022	corn	Dmel	FBgn0259173	CG42278	CG32390,CG32386,CG8621	3	NA	1	1	NA	0	0	0	0	0	0
3R	30598355	30598361	7	FBgn0051019	FBtr0085665	CG31019	C;C	C	C	1	0.00127834	CG31019	Dmel	FBgn0051019	CG31019		NA	NA	1	NA	NA	0	0	0	0	0	0
X	21478537	21478543	7	FBgn0031181	FBtr0077213	Ir20a	C;C	C	C	0.534039	0.00461144	Ir20a	Dmel	FBgn0031181	CG14584		NA	NA	1	NA	NA	0	1	0	0	0	0
3R	6174513	6174519	7	FBgn0037406	FBtr0078588	Osi1	C;C	C	C	0.534039	2.93254e-05	Osi1	Dmel	FBgn0037406	CG15585		NA	NA	1	NA	NA	0	1	0	0	0	0
2R	22114206	22114212	7	FBgn0050280	FBtr0300929	CG30280	C;C	C	C	0.534039	0.0164187	CG30280	Dmel	FBgn0050280	CG30280	CG6676	NA	NA	1	NA	NA	0	0	0	0	1	0
3L	3986902	3986908	7	FBgn0004880	FBtr0073165	scrt	C;C	C	C	1	0.00103949	scrt	Dmel	FBgn0004880	CG1130		NA	NA	1	NA	NA	0	0	1	0	0	0
X	20474365	20474371	7	FBgn0031118	FBtr0345015	RhoGAP19D	C;C	C	C	0.534039	0.00594763	RhoGAP19D	Dmel	FBgn0031118	CG1412		3	NA	1	1	NA	0	0	0	0	0	0
3L	16796260	16796266	7	FBgn0036663	FBtr0345074	CG9674	C;C	C	C	0.534039	0.0133282	CG9674	Dmel	FBgn0036663	CG9674		3	NA	1	1	NA	0	0	0	0	0	0
2R	7398948	7398954	7	FBgn0033166	FBtr0089007	Eaf	C;C	C	C	0.534039	0.0117343	Eaf	Dmel	FBgn0033166	CG11166	CG1706	NA	NA	1	NA	NA	0	0	0	0	0	0
2L	13917031	13917037	7	FBgn0032536	FBtr0100327	Ance-3	C;C	C	C	1	0.0362471	Ance-3	Dmel	FBgn0032536	CG17988	CG31766,CG31843	NA	NA	1	NA	NA	0	1	0	0	0	0
3R	31619654	31619660	7	FBgn0039861	FBtr0337032	pasha	C;C	C	C	0.534039	0.00863199	pasha	Dmel	FBgn0039861	CG1800		3	NA	1	1	NA	1	0	0	0	1	0
2R	17633281	17633287	7	FBgn0004400	FBtr0086897	rhi	C;C	C	C	0.651555	0.0118786	rhi	Dmel	FBgn0004400	CG10683		NA	NA	1	NA	NA	0	0	0	0	0	0
3L	6993995	6994001	7	FBgn0045759	FBtr0076900	bin	C;C	C	C	0.534039	0.106944	bin	Dmel	FBgn0045759	CG18647		NA	NA	1	NA	NA	0	0	1	0	1	0
2L	21503024	21503030	7	FBgn0053882	FBtr0091886	His2B:CG33882	C;C	C	C	0.534039	0.0633356	His2B:CG33882	Dmel	FBgn0053882	CG33882		NA	NA	1	NA	NA	0	0	0	0	0	0
3R	9071811	9071817	7	FBgn0003165	FBtr0081990	pum	C;C	C	C	0.651555	0.0106854	pum	Dmel	FBgn0003165	CG9755	CG9763	3	NA	1	1	NA	1	0	0	0	0	0
X	16682371	16682377	7	FBgn0000152	FBtr0074372	Axs	C;C	C	C	0.534039	0.08951	Axs	Dmel	FBgn0000152	CG9703		NA	NA	1	NA	NA	0	1	0	0	1	0
3L	2005522	2005528	7	FBgn0262030	FBtr0303925	CG42841	C;C	C	C	0.534039	0.272489	CG42841	Dmel	FBgn0262030	CG42841		3	NA	1	1	NA	0	0	0	0	0	0
3L	6965646	6965652	7	FBgn0035724	FBtr0076937	CG10064	C;C	C	C	0.651555	0.059687	CG10064	Dmel	FBgn0035724	CG10064		NA	NA	1	NA	NA	0	0	0	0	0	0
2R	20639563	20639569	7	FBgn0250850	FBtr0086252	rig	C;C	C	C	0.651555	0.00362695	rig	Dmel	FBgn0250850	CG30149	CG13440,CG11171	NA	NA	1	NA	NA	0	0	0	0	0	0
3R	24321761	24321767	7	FBgn0011785	FBtr0084604	BRWD3	C;C	C	C	0.651555	0.187802	BRWD3	Dmel	FBgn0011785	CG31132	CG6400,CG18670	NA	NA	1	NA	NA	0	0	0	0	1	0
X	8719046	8719052	7	FBgn0027330	FBtr0344164	l(1)G0020	C;C	C	C	0.534039	0.00560589	l(1)G0020	Dmel	FBgn0027330	CG1994		NA	NA	1	NA	NA	0	0	0	0	1	0
X	13680014	13680020	7	FBgn0030510	FBtr0073846	CG12177	C;C	C	C	1	0.0194137	CG12177	Dmel	FBgn0030510	CG12177		NA	NA	1	NA	NA	0	0	0	0	0	0
X	16276687	16276693	7	FBgn0004066	FBtr0074210	Prosalpha4	C;C	C	C	1	0.00265448	Prosalpha4	Dmel	FBgn0004066	CG3422		NA	NA	1	NA	NA	0	0	0	0	0	0
2L	10742814	10742820	7	FBgn0032296	FBtr0080119	CG6729	C;C	C	C	0.534039	0.00194379	CG6729	Dmel	FBgn0032296	CG6729		NA	NA	1	NA	NA	0	0	0	0	0	0
3R	4440758	4440764	7	FBgn0037252	FBtr0078926	CG14650	C;C	C	C	0.651555	0.0350173	CG14650	Dmel	FBgn0037252	CG14650		NA	NA	1	NA	NA	0	1	0	0	0	0
3R	16653661	16653667	7	FBgn0051217	FBtr0083353	modSP	C;C	C	C	0.651555	0.0787396	modSP	Dmel	FBgn0051217	CG31217	CG10100,CG17557	NA	NA	1	NA	NA	0	0	0	0	0	0
X	10851305	10851311	7	FBgn0030240	FBtr0073380	CG2202	C;C	C	C	0.651555	0.0461297	CG2202	Dmel	FBgn0030240	CG2202		NA	NA	1	NA	NA	0	0	1	0	0	0
3L	20783752	20783758	7	FBgn0037021	FBtr0078277	CG11399	C;C	C	C	1	0.0336564	Pcif1	Dmel	FBgn0037021	CG11399		NA	NA	1	NA	NA	0	0	0	0	0	0
3R	30793211	30793217	7	FBgn0011739	FBtr0085720	wts	C;C	C	C	0.534039	0.102155	wts	Dmel	FBgn0011739	CG12072		NA	NA	1	NA	NA	0	0	0	0	0	0
2L	5969307	5969313	7	FBgn0031757	FBtr0079172	Ucp4C	C;C	C	C	1	0.00219276	Ucp4C	Dmel	FBgn0031757	CG9064		NA	NA	1	NA	NA	0	1	0	0	0	0
2R	14670298	14670304	7	FBgn0033955	FBtr0339981	CG12866	C;C	C	C	0.651555	0.00566487	Targ	Dmel	FBgn0033955	CG12866		3	NA	1	1	NA	0	1	0	0	0	0
2R	15523404	15523410	7	FBgn0019968	FBtr0329956	Khc-73	C;C	C	C	0.651555	0.0859242	Khc-73	Dmel	FBgn0019968	CG8183		NA	NA	1	NA	NA	0	0	0	0	0	0
3L	7898418	7898424	7	FBgn0003041	FBtr0112817	pbl	C;C	C	C	1	0.00141877	pbl	Dmel	FBgn0003041	CG8114		NA	5	1	NA	1	0	0	0	0	0	0
2R	23857876	23857882	7	FBgn0004581	FBtr0344878	bgcn	C;C	C	C	0.651555	0.211522	bgcn	Dmel	FBgn0004581	CG30170	CG10331,CG10330	NA	NA	1	NA	NA	0	0	0	0	0	0
2L	16828263	16828269	7	FBgn0051739	FBtr0080919	AspRS-m	C;C	C	C	1	0.000494097	AspRS-m	Dmel	FBgn0051739	CG31739	CG17938	NA	NA	1	NA	NA	0	0	0	0	1	0
3L	9670970	9670976	7	FBgn0016081	FBtr0333859	fry	C;C	C	C	1	0.347983	fry	Dmel	FBgn0016081	CG32045	CG6780,CG6774,CG14171	NA	NA	1	NA	NA	0	0	0	0	0	0
2L	14320237	14320243	7	FBgn0261563	FBtr0302734	wb	C;C	C	C	1	0.0560263	wb	Dmel	FBgn0261563	CG42677	CG32970,CG15288	NA	5	1	NA	1	0	1	0	0	0	0
3L	20456992	20456998	7	FBgn0036995	FBtr0078223	atk	C;C	C	C	0.534039	0.00811174	atk	Dmel	FBgn0036995	CG5195		NA	NA	1	NA	NA	0	0	0	0	0	0
X	15332654	15332660	7	FBgn0030628	FBtr0074020	CG9114	C;C	C	C	0.534039	0.0291495	CG9114	Dmel	FBgn0030628	CG9114		3	NA	1	1	NA	0	0	0	0	0	0
3R	11422882	11422888	7	FBgn0037897	FBtr0082387	CG5270	C;C	C	C	0.651555	0.000264958	CG5270	Dmel	FBgn0037897	CG5270		NA	NA	1	NA	NA	0	0	0	0	0	0
X	2342762	2342768	7	FBgn0003079	FBtr0344007	Raf	C;C	C	C	1	0.0886886	Raf	Dmel	FBgn0003079	CG2845		NA	NA	1	NA	NA	0	0	0	0	0	0
2R	6600706	6600712	7	FBgn0033076	FBtr0305958	CG15233	C;C	C	C	0.534039	0.133451	CG15233	Dmel	FBgn0033076	CG15233		NA	NA	1	NA	NA	0	0	0	0	0	0
2R	19492697	19492703	7	FBgn0026378	FBtr0086462	Rep	C;C	C	C	1	0.00137041	Rep	Dmel	FBgn0026378	CG8432		NA	NA	1	NA	NA	0	0	0	0	1	0
3R	18182427	18182433	7	FBgn0261532	FBtr0083619	cdm	C;C	C	C	0.651555	0.0719927	cdm	Dmel	FBgn0261532	CG7212		NA	NA	1	NA	NA	0	0	0	0	0	0
3L	12860060	12860066	7	FBgn0052107	FBtr0345345	CG32107	C;C	C	C	1	0.165319	CG32107	Dmel	FBgn0052107	CG32107		NA	NA	1	NA	NA	0	0	0	0	0	0
2R	16497067	16497073	7	FBgn0285943	FBtr0087126	knon	C;C	C	C	0.534039	0.0344776	knon	Dmel	FBgn0285943	CG7813		NA	NA	1	NA	NA	0	0	0	0	0	0
3L	13501855	13501861	7	FBgn0036373	FBtr0075810	Tgi	C;C	C	C	0.534039	0.128354	Tgi	Dmel	FBgn0036373	CG10741		NA	NA	1	NA	NA	0	0	0	0	0	0
2R	12436648	12436654	7	FBgn0050051	FBtr0114521	Tmem18	C;C	C	C	1	0.00880576	Tmem18	Dmel	FBgn0050051	CG30051		NA	NA	1	NA	NA	0	1	0	0	0	0
X	19731568	19731574	7	FBgn0010380	FBtr0074789	AP-1-2beta	C;C	C	C	1	0.044394	AP-1-2beta	Dmel	FBgn0010380	CG12532		NA	NA	1	NA	NA	0	0	0	0	1	0
2L	4959565	4959571	7	FBgn0083960	FBtr0110838	CG34124	C;C	C	C	1	0.141528	CG34124	Dmel	FBgn0083960	CG34124	CG31652	NA	NA	1	NA	NA	0	0	0	0	0	0
2L	7536462	7536468	7	FBgn0264895	FBtr0334850	RapGAP1	C;C	C	C	0.534039	0.00527233	RapGAP1	Dmel	FBgn0264895	CG44086	CG33529,CG13789,CG6682,CG34374,CG13790,CG13791	3	5	1	1	1	0	0	0	0	0	0
3R	27060259	27060265	7	FBgn0039478	FBtr0331705	Nep5	C;C	C	C	0.651555	0.0324426	Nep5	Dmel	FBgn0039478	CG6265		NA	NA	1	NA	NA	0	1	0	0	0	0
2R	22283738	22283744	7	FBgn0020307	FBtr0071775	dve	C;C	C	C	0.534039	0.0075204	dve	Dmel	FBgn0020307	CG5799		3	NA	1	1	NA	0	0	1	0	0	0
3R	31793316	31793322	7	FBgn0039877	FBtr0307551	CG2118	C;C	C	C	0.534039	0.0950147	Mccc1	Dmel	FBgn0039877	CG2118		NA	5	1	NA	1	0	0	0	0	0	0
2L	738803	738809	7	FBgn0026438	FBtr0301317	Eaat2	C;C	C	C	0.651555	0.126699	Eaat2	Dmel	FBgn0026438	CG3159		NA	NA	1	NA	NA	0	1	0	0	0	0
3L	19816648	19816654	7	FBgn0036911	FBtr0089595	Fibp	C;C	C	C	1	0.00669946	Fibp	Dmel	FBgn0036911	CG8660		3	NA	1	1	NA	0	0	0	0	0	0
3R	21085439	21085445	7	FBgn0038853	FBtr0084036	RhoGAP93B	C;C	C	C	0.651555	0.0982047	RhoGAP93B	Dmel	FBgn0038853	CG3421		3	NA	1	1	NA	0	0	0	0	0	0
3L	8175542	8175548	7	FBgn0040290	FBtr0076729	RecQ4	C;C	C	C	0.534039	0.00984367	RecQ4	Dmel	FBgn0040290	CG7487		NA	NA	1	NA	NA	0	0	0	0	0	0
3R	23999078	23999084	7	FBgn0020647	FBtr0339250	KrT95D	C;C	C	C	0.534039	0.0104204	KrT95D	Dmel	FBgn0020647	CG5405		NA	NA	1	NA	NA	0	0	0	0	0	0
2L	10253856	10253862	7	FBgn0010407	FBtr0079978	Ror	C;C	C	C	1	0.172817	Ror	Dmel	FBgn0010407	CG4926		NA	NA	1	NA	NA	0	1	0	0	0	0
2L	5580828	5580834	7	FBgn0031722	FBtr0079120	CG14011	C;C	C	C	0.651555	0.00673977	CG14011	Dmel	FBgn0031722	CG14011		NA	NA	1	NA	NA	0	0	0	0	0	0
2L	5818277	5818283	7	FBgn0051644	FBtr0079159	CG31644	C;C	C	C	0.651555	0.0803815	COX6CL	Dmel	FBgn0051644	CG31644		NA	NA	1	NA	NA	0	0	0	0	0	0
2R	21149856	21149862	7	FBgn0050389	FBtr0330235	CG30389	C;C	C	C	0.651555	0.044241	CG30389	Dmel	FBgn0050389	CG30389	CG4126,CG10518	NA	5	1	NA	1	0	1	0	0	1	0
3L	21557228	21557234	7	FBgn0037099	FBtr0078380	CG7173	C;C	C	C	0.534039	0.0585473	CG7173	Dmel	FBgn0037099	CG7173		NA	NA	1	NA	NA	0	0	0	0	0	0
2R	16858107	16858113	7	FBgn0026533	FBtr0332946	Dek	C;C	C	C	1	0.00686001	Dek	Dmel	FBgn0026533	CG5935	CG593	NA	NA	1	NA	NA	0	0	1	0	0	0
3R	23710869	23710875	7	FBgn0039106	FBtr0114504	CG10301	C;C	C	C	0.534039	0.00332187	CG10301	Dmel	FBgn0039106	CG10301		NA	NA	1	NA	NA	0	0	0	0	0	0
X	14269631	14269637	7	FBgn0002917	FBtr0344823	na	C;C	C	C	0.651555	0.038493	na	Dmel	FBgn0002917	CG1517		NA	NA	1	NA	NA	0	1	0	0	1	0
3L	8615848	8615854	7	FBgn0035914	FBtr0330165	CG6282	C;C	C	C	0.534039	0.00809169	CG6282	Dmel	FBgn0035914	CG6282		3	NA	1	1	NA	0	1	0	0	0	0
2R	17553157	17553163	7	FBgn0034240	FBtr0086946	MESR4	C;C	C	C	0.534039	0.0137703	MESR4	Dmel	FBgn0034240	CG4903		NA	NA	1	NA	NA	0	0	1	0	0	0
3R	14523537	14523543	7	FBgn0038237	FBtr0300330	Pde6	C;C	C	C	1	0.0471421	Pde6	Dmel	FBgn0038237	CG8279		NA	5	1	NA	1	0	0	0	0	0	0
3R	25480276	25480282	7	FBgn0039338	FBtr0344719	XNP	C;C	C	C	0.651555	0.0822294	XNP	Dmel	FBgn0039338	CG4548		NA	NA	1	NA	NA	0	0	0	0	0	0
2L	6655587	6655593	7	FBgn0051633	FBtr0079325	CG31633	C;C	C	C	0.651555	0.0167403	CG31633	Dmel	FBgn0051633	CG31633	CG13770	NA	NA	1	NA	NA	0	0	0	0	0	0
3L	10491807	10491813	7	FBgn0052064	FBtr0076288	S-Lap4	C;C	C	C	0.651555	0.0646818	S-Lap4	Dmel	FBgn0052064	CG32064	CG8040	NA	NA	1	NA	NA	0	0	0	0	0	0
2L	11799286	11799292	7	FBgn0020309	FBtr0080260	crol	C;C	C	C	0.651555	0.0307661	crol	Dmel	FBgn0020309	CG14938		NA	NA	1	NA	NA	0	0	1	0	1	0
X	10597526	10597532	7	FBgn0030217	FBtr0071491	CG2124	C;C	C	C	0.534039	0.00757593	CG2124	Dmel	FBgn0030217	CG2124		NA	NA	1	NA	NA	1	0	0	0	0	0
3L	21572592	21572598	7	FBgn0052438	FBtr0301601	SMC5	C;C	C	C	0.651555	0.000851804	SMC5	Dmel	FBgn0052438	CG32438	CG7783	NA	NA	1	NA	NA	0	0	0	0	0	0
X	14950364	14950370	7	FBgn0027601	FBtr0303294	pdgy	C;C	C	C	0.651555	0.0588809	pdgy	Dmel	FBgn0027601	CG9009		NA	NA	1	NA	NA	0	0	0	0	0	0
3R	8809658	8809664	7	FBgn0037635	FBtr0334331	CG9837	C;C	C	C	0.534039	0.0718103	CG9837	Dmel	FBgn0037635	CG9837		NA	5	1	NA	1	0	0	0	0	0	0
2L	2982271	2982277	7	FBgn0250786	FBtr0331654	Chd1	C;C	C	C	0.651555	0.123509	Chd1	Dmel	FBgn0250786	CG3733		3	NA	1	1	NA	0	0	0	0	1	0
2L	12125995	12126001	7	FBgn0032414	FBtr0080336	CG17211	C;C	C	C	1	0.00451493	CG17211	Dmel	FBgn0032414	CG17211		NA	NA	1	NA	NA	0	0	0	0	0	0
2R	13774376	13774382	7	FBgn0033867	FBtr0087629	Cpr50Ca	C;C	C	C	0.534039	0.0497509	Cpr50Ca	Dmel	FBgn0033867	CG13338		3	NA	1	1	NA	0	0	0	0	0	0
3L	16389132	16389138	7	FBgn0036624	FBtr0333596	RAF2	C;C	C	C	0.651555	0.0406478	RAF2	Dmel	FBgn0036624	CG4877	CG4689	NA	NA	1	NA	NA	0	0	0	0	0	0
X	11991816	11991822	7	FBgn0030359	FBtr0073581	CG18130	C;C	C	C	1	0.0370859	CG18130	Dmel	FBgn0030359	CG18130		NA	NA	1	NA	NA	0	0	0	0	1	0
X	17590889	17590895	7	FBgn0030846	FBtr0335252	CG12992	C;C	C	C	0.534039	0.0373355	CG12992	Dmel	FBgn0030846	CG12992		NA	NA	1	NA	NA	0	0	0	0	0	0
3R	5.51286e+06	5.51286e+06	7	FBgn0010399	FBtr0078763	Nmdar1	C;C	C	C	0.534039	0.00909641	Nmdar1	Dmel	FBgn0010399	CG2902		3	NA	1	1	NA	0	1	0	0	0	0
X	5.70454e+06	5.70455e+06	7	FBgn0029791	FBtr0301083	CG4096	C;C	C	C	0.651555	0.0930537	AdamTS-B	Dmel	FBgn0029791	CG4096		NA	NA	1	NA	NA	0	0	0	0	0	0
2R	10310619	10310625	7	FBgn0033507	FBtr0088348	CG12909	C;C	C	C	1	0.00613312	CG12909	Dmel	FBgn0033507	CG12909		NA	NA	1	NA	NA	0	0	0	0	0	0
3R	16597894	16597900	7	FBgn0027562	FBtr0083360	CG10345	C;C	C	C	1	0.00151809	CG10345	Dmel	FBgn0027562	CG10345		NA	NA	1	NA	NA	0	1	0	0	0	0
X	15773741	15773747	7	FBgn0263747	FBtr0310394	CG43672	C;C	C	C	0.534039	0.0319789	CG43672	Dmel	FBgn0263747	CG43672	CG33173,CG8473	NA	NA	1	NA	NA	0	1	0	0	0	0
X	5963082	5963088	7	FBgn0005390	FBtr0070892	fs(1)M3	C;C	C	C	0.534039	0.0269237	fs(1)M3	Dmel	FBgn0005390	CG4790		NA	NA	1	NA	NA	0	0	0	0	0	0
2L	13709861	13709867	7	FBgn0028848	FBtr0305567	CG7311	C;C	C	C	1	0.0122399	Gpo3	Dmel	FBgn0028848	CG7311		3	NA	1	1	NA	0	0	0	0	0	0
3R	10694293	10694299	7	FBgn0262717	FBtr0305665	Skeletor	C;C	C	C	0.534039	0.000486467	Skeletor	Dmel	FBgn0262717	CG43161	CG33676,CG14681,CG32922,CG14682,CG31261	3	NA	1	1	NA	0	0	0	0	0	0
3L	204055	204061	7	FBgn0024945	FBtr0072483	NitFhit	C;C	C	C	1	0.0127559	NitFhit	Dmel	FBgn0024945	CG7067		NA	NA	1	NA	NA	0	0	0	0	0	0
X	3466075	3466081	7	FBgn0029662	FBtr0070529	CG12206	C;C	C	C	0.651555	0.0868053	CG12206	Dmel	FBgn0029662	CG12206		NA	NA	1	NA	NA	0	0	0	0	1	0
X	18690754	18690760	7	FBgn0010383	FBtr0074609	Cyp18a1	C;C	C	C	1	0.00937423	Cyp18a1	Dmel	FBgn0010383	CG6816		NA	NA	1	NA	NA	0	0	0	0	1	0
3L	13351345	13351351	7	FBgn0036348	FBtr0075838	CG17687	C;C	C	C	0.534039	0.00153379	CG17687	Dmel	FBgn0036348	CG17687		NA	NA	1	NA	NA	0	0	0	0	0	0
3R	20863050	20863056	7	FBgn0038837	FBtr0083987	CG3822	C;C	C	C	0.651555	0.103272	KaiR1D	Dmel	FBgn0038837	CG3822		NA	NA	1	NA	NA	0	1	0	0	0	0
2L	3291938	3291944	7	FBgn0031515	FBtr0077605	CG9664	C;C	C	C	1	0.0148293	CG9664	Dmel	FBgn0031515	CG9664		3	NA	1	1	NA	0	1	0	0	1	0
2L	8122382	8122388	7	FBgn0031985	FBtr0301229	mon2	C;C	C	C	0.534039	0.028581	mon2	Dmel	FBgn0031985	CG8683	CG31756,CG14276	NA	NA	1	NA	NA	0	0	0	0	0	0
2R	12556965	12556971	7	FBgn0011592	FBtr0087822	fra	C;C	C	C	1	0.098611	fra	Dmel	FBgn0011592	CG8581		NA	NA	1	NA	NA	0	1	0	0	1	0
X	15577642	15577648	7	FBgn0030657	FBtr0310052	cerv	C;C	C	C	0.534039	0.06379	cerv	Dmel	FBgn0030657	CG15645		NA	NA	1	NA	NA	0	0	0	0	1	0
3L	10088101	10088107	7	FBgn0036066	FBtr0076316	CG14160	C;C	C	C	1	0.0146817	CG14160	Dmel	FBgn0036066	CG14160		NA	NA	1	NA	NA	0	1	0	0	0	0
3L	19069019	19069025	7	FBgn0036844	FBtr0330089	Mkp3	C;C	C	C	1	0.000805607	Mkp3	Dmel	FBgn0036844	CG14080	CG14081	NA	NA	1	NA	NA	0	0	0	0	0	0
2R	21989154	21989160	7	FBgn0085399	FBtr0299544	CG34370	C;C	C	C	0.534039	0.374424	CG34370	Dmel	FBgn0085399	CG34370	CG34004,CG33227,CG13499,CG13498,CG13497,CG30408,CG30405	NA	NA	1	NA	NA	0	1	0	0	0	0
2R	15472915	15472921	7	FBgn0034021	FBtr0345392	CG8180	C;C	C	C	0.534039	0.00581822	CG8180	Dmel	FBgn0034021	CG8180		NA	NA	1	NA	NA	0	1	0	0	0	0
3R	18430909	18430915	7	FBgn0004652	FBtr0083648	fru	C;C	C	C	0.534039	0.00197668	fru	Dmel	FBgn0004652	CG14307	CG7689,CG7690,CG7688	3	NA	1	1	NA	0	0	1	0	0	0
3L	6034201	6034207	7	FBgn0035661	FBtr0077068	CG10477	C;C	C	C	0.534039	0.00192079	CG10477	Dmel	FBgn0035661	CG10477		NA	NA	1	NA	NA	0	0	0	0	0	0
2L	8969257	8969263	7	FBgn0032082	FBtr0332186	CG18088	C;C	C	C	1	0.0652549	CG18088	Dmel	FBgn0032082	CG18088		NA	NA	1	NA	NA	0	0	0	0	0	0
2R	1.13027e+07	1.13027e+07	7	FBgn0033614	FBtr0088171	Obp47b	C;C	C	C	0.534039	0.00911606	Obp47b	Dmel	FBgn0033614	CG13208		NA	NA	1	NA	NA	0	0	0	0	0	0
3R	27707304	27707310	7	FBgn0039544	FBtr0100446	CG12877	C;C	C	C	0.534039	0.06462	CG12877	Dmel	FBgn0039544	CG12877		NA	NA	1	NA	NA	0	0	0	0	0	0
3L	19448749	19448755	7	FBgn0023395	FBtr0074998	Chd3	C;C	C	C	0.534039	0.0135788	Chd3	Dmel	FBgn0023395	CG9594		NA	NA	1	NA	NA	0	0	0	0	0	0
3R	15368967	15368973	7	FBgn0038330	FBtr0083109	CG14868	C;C	C	C	0.651555	0.0586318	CG14868	Dmel	FBgn0038330	CG14868		NA	NA	1	NA	NA	0	0	0	0	0	0
2L	8196192	8196198	7	FBgn0031995	FBtr0079638	CG8475	C;C	C	C	1	7.31959e-05	CG8475	Dmel	FBgn0031995	CG8475		NA	NA	1	NA	NA	0	1	0	0	0	0
X	2256193	2256199	7	FBgn0023524	FBtr0340208	CG3078	C;C	C	C	0.534039	0.00150816	CG3078	Dmel	FBgn0023524	CG3078		NA	NA	1	NA	NA	0	1	0	0	0	0
3R	11742831	11742837	7	FBgn0037943	FBtr0082431	CG14722	C;C	C	C	0.534039	0.0246622	CG14722	Dmel	FBgn0037943	CG14722		NA	NA	1	NA	NA	0	0	0	0	0	0
3R	16378474	16378480	7	FBgn0003513	FBtr0083318	ss	C;C	C	C	0.534039	0.0185798	ss	Dmel	FBgn0003513	CG6993		NA	NA	1	NA	NA	0	0	1	0	0	0
2L	20093750	20093756	7	FBgn0032847	FBtr0081340	Taf13	C;C	C	C	0.534039	0.0451341	Taf13	Dmel	FBgn0032847	CG10756		NA	NA	1	NA	NA	0	0	0	0	0	0
2L	5884026	5884032	7	FBgn0265785	FBtr0342613	CG44574	C;C	C	C	0.534039	0.00823777	CG44574	Dmel	FBgn0265785	CG44574		NA	NA	1	NA	NA	0	0	0	0	0	0
3L	1749035	1749041	7	FBgn0035267	FBtr0334072	CG13921	C;C	C	C	0.534039	0.00630908	CG13921	Dmel	FBgn0035267	CG13921		NA	NA	1	NA	NA	0	1	0	0	0	0
3R	25745939	25745945	7	FBgn0066101	FBtr0113480	LpR1	C;C	C	C	1	0.00871976	LpR1	Dmel	FBgn0066101	CG31094	CG4861,CG4874,CG4870,CG31095	NA	NA	1	NA	NA	0	1	0	0	0	1
2R	19131008	19131014	7	FBgn0027535	FBtr0086579	botv	C;C	C	C	0.534039	0.0294581	botv	Dmel	FBgn0027535	CG15110		NA	NA	1	NA	NA	0	1	0	0	0	0
3L	22914184	22914190	7	FBgn0037206	FBtr0078560	CG12768	C;C	C	C	0.651555	0.0508958	CG12768	Dmel	FBgn0037206	CG12768		NA	NA	1	NA	NA	0	0	0	0	0	0
2L	4474347	4474353	7	FBgn0011603	FBtr0077446	ine	C;C	C	C	0.534039	0.0275669	ine	Dmel	FBgn0011603	CG15444		NA	NA	1	NA	NA	0	1	0	0	0	0
2R	22602216	22602222	7	FBgn0034742	FBtr0308603	CG4294	C;C	C	C	0.534039	0.0468471	CG4294	Dmel	FBgn0034742	CG4294		NA	NA	1	NA	NA	0	0	0	0	0	0
2L	12736683	12736689	7	FBgn0032456	FBtr0090028	MRP	C;C	C	C	1	0.0727557	MRP	Dmel	FBgn0032456	CG6214		NA	NA	1	NA	NA	0	1	0	0	0	0
2L	786967	786973	7	FBgn0000442	FBtr0078042	Pkg21D	C;C	C	C	1	0.0350206	Pkg21D	Dmel	FBgn0000442	CG3324		NA	NA	1	NA	NA	0	0	0	0	0	0
X	15324477	15324483	7	FBgn0004924	FBtr0340434	Top1	C;C	C	C	0.651555	0.12216	Top1	Dmel	FBgn0004924	CG6146		NA	NA	1	NA	NA	0	0	0	0	1	0
X	14245882	14245888	7	FBgn0260482	FBtr0073904	CG32599	C;C	C	C	0.534039	0.00950779	CG32599	Dmel	FBgn0260482	CG32599	CG12047	NA	NA	1	NA	NA	0	1	0	0	0	0
3R	7908440	7908446	7	FBgn0024909	FBtr0081756	Taf7	C;C	C	C	1	0.0251188	Taf7	Dmel	FBgn0024909	CG2670		NA	NA	1	NA	NA	0	0	0	0	0	0
3L	19551630	19551636	7	FBgn0262517	FBtr0074974	Ltn1	C;C	C	C	1	0.0448722	Ltn1	Dmel	FBgn0262517	CG32210	CG9274,CG9268	NA	NA	1	NA	NA	0	0	0	0	0	0
2R	16940108	16940114	7	FBgn0003091	FBtr0087049	Pkc53E	C;C	C	C	1	0.00508786	Pkc53E	Dmel	FBgn0003091	CG6622		NA	NA	1	NA	NA	0	0	0	0	0	0
2R	7176173	7176179	7	FBgn0033149	FBtr0089045	CG11060	C;C	C	C	1	0.00725026	CG11060	Dmel	FBgn0033149	CG11060		NA	NA	1	NA	NA	0	0	0	0	0	0
2R	21265564	21265570	7	FBgn0050391	FBtr0071621	CG30391	C;C	C	C	1	0.00138794	CG30391	Dmel	FBgn0050391	CG30391	CG15662	NA	NA	1	NA	NA	0	0	0	0	0	0
2L	823029	823035	7	FBgn0031285	FBtr0100469	CG3662	C;C	C	C	0.534039	0.086973	CG3662	Dmel	FBgn0031285	CG3662		3	5	1	1	1	0	1	0	0	0	0
3L	4327423	4327429	7	FBgn0035533	FBtr0113138	Cip4	C;C	C	C	0.534039	0.00262041	Cip4	Dmel	FBgn0035533	CG15015	CG11341	3	NA	1	1	NA	0	0	0	0	0	0
X	15456598	15456604	7	FBgn0004391	FBtr0074077	shtd	C;C	C	C	0.534039	0.032899	shtd	Dmel	FBgn0004391	CG9198		NA	NA	1	NA	NA	0	1	0	0	0	0
3R	20505248	20505254	7	FBgn0038798	FBtr0083887	Or92a	C;C	C	C	0.651555	0.027407	Or92a	Dmel	FBgn0038798	CG17916		NA	NA	1	NA	NA	0	1	0	0	0	0
2R	6773725	6773731	7	FBgn0085421	FBtr0329849	Epac	C;C	C	C	0.651555	0.0147714	Epac	Dmel	FBgn0085421	CG34392	CG15235,CG3427	NA	5	1	NA	1	0	0	0	0	0	0
3R	27384203	27384209	7	FBgn0016061	FBtr0289998	side	C;C	C	C	0.534039	0.00106708	side	Dmel	FBgn0016061	CG31062	CG13979,CG13975,CG13974,CG13973,CG12510	NA	NA	1	NA	NA	0	1	0	0	0	0
3R	29795376	29795382	7	FBgn0262112	FBtr0085481	sro	C;C	C	C	0.534039	0.0073077	sro	Dmel	FBgn0262112	CG12068		NA	NA	1	NA	NA	0	0	0	0	0	0
X	2624458	2624464	7	FBgn0040333	FBtr0340092	brv3	C;C	C	C	0.651555	0.0872561	brv3	Dmel	FBgn0040333	CG13762		NA	NA	1	NA	NA	0	1	0	0	0	0
3R	10758008	10758014	7	FBgn0051272	FBtr0082312	CG31272	C;C	C	C	0.534039	0.0983451	CG31272	Dmel	FBgn0051272	CG31272	CG6529	NA	NA	1	NA	NA	0	1	0	0	0	0
3R	25024339	25024345	7	FBgn0039258	FBtr0084755	beta4GalT7	C;C	C	C	0.651555	0.00593414	beta4GalT7	Dmel	FBgn0039258	CG11780		NA	NA	1	NA	NA	0	1	0	0	0	0
2R	14883178	14883184	7	FBgn0033980	FBtr0300127	Cyp6a20	C;C	C	C	0.534039	0.112844	Cyp6a20	Dmel	FBgn0033980	CG10245		NA	NA	1	NA	NA	0	0	0	0	0	0
3R	21218492	21218498	7	FBgn0038869	FBtr0084108	Smyd5	C;C	C	C	1	0.00422102	Smyd5	Dmel	FBgn0038869	CG3353		NA	NA	1	NA	NA	0	0	0	0	0	0
4	1108510	1108516	7	FBgn0005561	FBtr0100344	sv	C;C	C	C	0.651555	0.0817948	sv	Dmel	FBgn0005561	CG11049		NA	NA	1	NA	NA	0	0	1	0	0	0
2R	22074078	22074084	7	FBgn0034689	FBtr0071800	CG2921	C;C	C	C	0.534039	0.0560774	CG2921	Dmel	FBgn0034689	CG2921		NA	NA	1	NA	NA	0	0	0	0	0	0
2R	13779291	13779297	7	FBgn0033868	FBtr0087649	S-Lap7	C;C	C	C	0.651555	0.0755047	S-Lap7	Dmel	FBgn0033868	CG13340		NA	NA	1	NA	NA	0	0	0	0	0	0
X	17193368	17193374	7	FBgn0000163	FBtr0111000	baz	C;C	C	C	1	0.0127019	baz	Dmel	FBgn0000163	CG5055		NA	NA	1	NA	NA	0	0	0	0	0	0
2R	18047269	18047275	7	FBgn0034292	FBtr0086811	CG5767	C;C	C	C	1	0.00386435	CG5767	Dmel	FBgn0034292	CG5767		NA	NA	1	NA	NA	0	0	0	0	0	0
2L	3605628	3605634	7	FBgn0002985	FBtr0077557	odd	C;C	C	C	1	0.00378301	odd	Dmel	FBgn0002985	CG3851		NA	NA	1	NA	NA	0	0	1	0	0	0
3R	7088176	7088182	7	FBgn0003884	FBtr0081639	alphaTub84B	C;C	C	C	1	0.0224774	alphaTub84B	Dmel	FBgn0003884	CG1913		NA	NA	1	NA	NA	0	0	0	0	1	0
2L	9575943	9575949	7	FBgn0028479	FBtr0079858	Mtpalpha	C;C	C	C	0.534039	0.0120949	Mtpalpha	Dmel	FBgn0028479	CG4389		NA	5	1	NA	1	0	0	0	0	0	0
X	3911456	3911462	7	FBgn0260658	FBtr0301099	CG42541	C;C	C	C	0.534039	0.0466796	CG42541	Dmel	FBgn0260658	CG42541	CG32776,CG15240,CG16828,CG16829	NA	NA	1	NA	NA	0	0	0	0	0	0
2L	10223284	10223290	7	FBgn0032195	FBtr0079950	CG4908	C;C	C	C	0.651555	0.071127	CG4908	Dmel	FBgn0032195	CG4908		NA	NA	1	NA	NA	0	1	0	0	1	0
3R	12342058	12342064	7	FBgn0266261	FBtr0343913	CG44956	C;C	C	C	0.651555	0.0676571	CG44956	Dmel	FBgn0266261	CG44956		NA	NA	1	NA	NA	0	0	0	0	0	0
3R	17543941	17543947	7	FBgn0025571	FBtr0083456	SF1	C;C	C	C	1	0.137579	SF1	Dmel	FBgn0025571	CG5836		3	NA	1	1	NA	1	0	0	0	1	0
3L	17860112	17860118	7	FBgn0054002	FBtr0302155	CG34002	C;C	C	C	1	0.0230509	CG34002	Dmel	FBgn0054002	CG34002		NA	NA	1	NA	NA	0	0	0	0	0	0
3L	3047439	3047445	7	FBgn0052484	FBtr0072984	Sk2	C;C	C	C	1	0.00544707	Sk2	Dmel	FBgn0052484	CG32484	CG2159	NA	NA	1	NA	NA	0	0	0	0	0	0
3R	15831573	15831579	7	FBgn0003227	FBtr0334595	rec	C;C	C	C	0.534039	0.00937749	rec	Dmel	FBgn0003227	CG31293	CG4828,CG14875	NA	NA	1	NA	NA	0	0	0	0	0	0
3R	22302953	22302959	7	FBgn0038938	FBtr0344797	CG7084	C;C	C	C	1	0.0441864	CG7084	Dmel	FBgn0038938	CG7084		3	NA	1	1	NA	0	1	0	0	1	0
3L	9707298	9707304	7	FBgn0036032	FBtr0330098	CG16711	C;C	C	C	0.534039	0.02259	CG16711	Dmel	FBgn0036032	CG16711		NA	NA	1	NA	NA	0	0	0	0	0	0
3L	17838201	17838207	7	FBgn0001134	FBtr0075139	Grd	C;C	C	C	0.534039	0.00822206	Grd	Dmel	FBgn0001134	CG7446		NA	NA	1	NA	NA	0	1	0	0	0	0
3L	16726852	16726858	7	FBgn0043577	FBtr0075320	PGRP-SB2	C;C	C	C	0.534039	0.0281172	PGRP-SB2	Dmel	FBgn0043577	CG9697		NA	NA	1	NA	NA	0	1	0	0	0	0
3R	9515207	9515213	7	FBgn0014023	FBtr0082121	mRpL47	C;C	C	C	0.534039	0.0301402	mRpL47	Dmel	FBgn0014023	CG9378		NA	NA	1	NA	NA	0	0	0	0	1	0
3R	27267452	27267458	7	FBgn0002441	FBtr0085175	l(3)mbt	C;C	C	C	1	0.00250148	l(3)mbt	Dmel	FBgn0002441	CG5954		NA	NA	1	NA	NA	0	0	0	0	0	0
3R	13399356	13399362	7	FBgn0038149	FBtr0082760	GILT1	C;C	C	C	1	0.00113702	GILT1	Dmel	FBgn0038149	CG9796		NA	NA	1	NA	NA	0	1	0	0	0	0
3L	8230122	8230128	7	FBgn0265089	FBtr0076701	eIF4E3	C;C	C	C	0.651555	0.00511979	eIF4E3	Dmel	FBgn0265089	CG8023		NA	NA	1	NA	NA	1	0	0	0	0	0
3L	2728542	2728548	7	FBgn0052296	FBtr0344569	Mrtf	C;C	C	C	1	0.0432173	Mrtf	Dmel	FBgn0052296	CG32296	CG12188,CG14951	3	NA	1	1	NA	0	0	1	0	0	0
2L	12172150	12172156	7	FBgn0032420	FBtr0080358	CG6583	C;C	C	C	0.651555	0.00964546	CG6583	Dmel	FBgn0032420	CG6583		NA	NA	1	NA	NA	0	0	0	0	1	0
2R	22426703	22426709	7	FBgn0034729	FBtr0071840	CG10344	C;C	C	C	0.651555	0.0970849	CG10344	Dmel	FBgn0034729	CG10344		NA	NA	1	NA	NA	0	1	1	0	0	0
X	1427742	1427748	7	FBgn0259108	FBtr0307598	futsch	C;C	C	C	0.534039	0.108088	futsch	Dmel	FBgn0259108	CG34387	CG14772,CG3064	3	NA	1	1	NA	0	0	0	0	0	0
3R	7495943	7495949	7	FBgn0015577	FBtr0302355	alpha-Est9	C;C	C	C	0.651555	0.0464196	alpha-Est9	Dmel	FBgn0015577	CG1128		NA	NA	1	NA	NA	0	0	0	0	0	0
3R	11769145	11769151	7	FBgn0265276	FBtr0305186	l(3)neo38	C;C	C	C	0.651555	0.0292321	l(3)neo38	Dmel	FBgn0265276	CG6930	CG31364,CG14725	3	NA	1	1	NA	0	0	1	0	1	0
2L	557252	557258	7	FBgn0260933	FBtr0078078	rempA	C;C	C	C	1	0.00576372	rempA	Dmel	FBgn0260933	CG11838		NA	NA	1	NA	NA	0	0	0	0	0	0
3R	30463632	30463638	7	FBgn0039774	FBtr0085649	CDase	C;C	C	C	1	0.000947566	CDase	Dmel	FBgn0039774	CG1471		NA	NA	1	NA	NA	0	0	0	0	0	0
X	17096846	17096852	7	FBgn0030816	FBtr0074383	CG16700	C;C	C	C	0.651555	0.0352451	CG16700	Dmel	FBgn0030816	CG16700		NA	NA	1	NA	NA	0	1	0	0	0	0
3R	10142586	10142592	7	FBgn0037792	FBtr0333825	TAF1B	C;C	C	C	1	0.00534748	TAF1B	Dmel	FBgn0037792	CG6241		NA	NA	1	NA	NA	0	0	0	0	0	0
3R	25286324	25286330	7	FBgn0051104	FBtr0084825	CG31104	C;C	C	C	0.651555	0.0171001	CG31104	Dmel	FBgn0051104	CG31104	CG13657	NA	NA	1	NA	NA	0	0	0	0	0	0
X	8678809	8678815	7	FBgn0030055	FBtr0331728	CG12772	C;C	C	C	0.534039	0.0104468	Rubicon	Dmel	FBgn0030055	CG12772		NA	NA	1	NA	NA	0	0	0	0	1	0
X	16934188	16934194	7	FBgn0027556	FBtr0342973	CG4928	C;C	C	C	0.534039	0.00629611	CG4928	Dmel	FBgn0027556	CG4928		NA	NA	1	NA	NA	0	1	0	0	0	0
2L	13797779	13797785	7	FBgn0028538	FBtr0080537	Sec71	C;C	C	C	0.534039	0.0265656	Sec71	Dmel	FBgn0028538	CG7578		NA	NA	1	NA	NA	0	0	0	0	1	0
3R	7572549	7572555	7	FBgn0083963	FBtr0301072	Nlg3	C;C	C	C	0.651555	0.0122117	Nlg3	Dmel	FBgn0083963	CG34127	CG14597,CG32465,CG18291,CG1062	3	5	1	1	1	0	1	0	0	1	0
X	12900151	12900157	7	FBgn0052649	FBtr0073697	CG32649	C;C	C	C	0.534039	0.0422045	Coq8	Dmel	FBgn0052649	CG32649	CG4410	NA	NA	1	NA	NA	0	0	0	0	1	0
X	5078342	5078348	7	FBgn0052767	FBtr0302118	CG32767	C;C	C	C	1	2.68318e-05	CG32767	Dmel	FBgn0052767	CG32767	CG5086,CG5113	3	NA	1	1	NA	0	0	1	0	0	0
X	3942779	3942785	7	FBgn0052786	FBtr0344825	CG32786	C;C	C	C	0.534039	0.0417903	Gem4b	Dmel	FBgn0052786	CG32786		NA	NA	1	NA	NA	0	0	0	0	0	0
3R	12996112	12996118	7	FBgn0038106	FBtr0082695	CG7488	C;C	C	C	0.534039	0.000874944	CG7488	Dmel	FBgn0038106	CG7488		NA	NA	1	NA	NA	0	0	0	0	0	0
3R	12746849	12746855	7	FBgn0038084	FBtr0082658	beat-Vc	C;C	C	C	0.651555	0.0686153	beat-Vc	Dmel	FBgn0038084	CG14390		NA	5	1	NA	1	0	0	0	0	0	0
2R	17633927	17633933	7	FBgn0034255	FBtr0086896	Oxp	C;C	C	C	0.651555	0.0652488	Oxp	Dmel	FBgn0034255	CG18186		NA	NA	1	NA	NA	0	0	0	0	0	0
2R	15422045	15422051	7	FBgn0263980	FBtr0330011	CG43729	C;C	C	C	1	0.000232732	Stacl	Dmel	FBgn0263980	CG43729	CG8179,CG34318,CG30470,CG18625,CG12959,CG12958,CG34365,CG43223,CG14163	3	5	1	1	1	0	0	0	0	1	0
2R	7947902	7947908	7	FBgn0033236	FBtr0088880	CG14764	C;C	C	C	0.534039	0.00851046	CG14764	Dmel	FBgn0033236	CG14764	CG2923	NA	NA	1	NA	NA	0	0	0	0	0	0
2R	7793934	7793940	7	FBgn0002891	FBtr0088831	mus205	C;C	C	C	1	0.01856	PolZ1	Dmel	FBgn0002891	CG1925		NA	NA	1	NA	NA	0	0	0	0	0	0
3R	31783976	31783982	7	FBgn0005632	FBtr0085843	faf	C;C	C	C	0.651555	0.0109785	faf	Dmel	FBgn0005632	CG1945		NA	NA	1	NA	NA	0	0	0	0	0	0
3R	25172034	25172040	7	FBgn0083946	FBtr0110797	lobo	C;C	C	C	0.534039	0.0123261	lobo	Dmel	FBgn0083946	CG34110	CG13662,CG13661	NA	NA	1	NA	NA	0	0	0	0	0	0
3L	19599199	19599205	7	FBgn0010417	FBtr0333272	Taf6	C;C	C	C	0.534039	0.015854	Taf6	Dmel	FBgn0010417	CG32211	CG9348	NA	NA	1	NA	NA	0	0	0	0	1	0
3R	12933591	12933597	7	FBgn0038092	FBtr0337087	beat-Vb	C;C	C	C	0.534039	0.00684667	beat-Vb	Dmel	FBgn0038092	CG31298	CG14386,CG14385	NA	NA	1	NA	NA	0	1	0	0	0	0
3R	27919084	27919090	7	FBgn0053213	FBtr0085271	CG33213	C;C	C	C	1	0.00143377	CG33213	Dmel	FBgn0053213	CG33213	CG12260	NA	NA	1	NA	NA	0	0	1	0	0	0
X	22537997	22538003	7	FBgn0031194	FBtr0333716	CG17598	C;C	C	C	1	0.106392	CG17598	Dmel	FBgn0031194	CG17598		NA	NA	1	NA	NA	0	0	0	0	0	0
X	5984325	5984331	7	FBgn0029830	FBtr0343414	Grip	C;C	C	C	1	0.00553521	Grip	Dmel	FBgn0029830	CG14447	CG5980	NA	NA	1	NA	NA	0	0	0	0	1	0
3R	14660199	14660205	7	FBgn0038251	FBtr0082968	Hexim	C;C	C	C	1	0.15009	Hexim	Dmel	FBgn0038251	CG3508		NA	NA	1	NA	NA	1	0	0	0	1	0
3R	14566875	14566881	7	FBgn0051313	FBtr0082982	CG31313	C;C	C	C	0.651555	0.00263989	CG31313	Dmel	FBgn0051313	CG31313		3	NA	1	1	NA	0	0	0	0	0	0
X	15821547	15821553	7	FBgn0003345	FBtr0310311	sd	C;C	C	C	0.534039	0.00944909	sd	Dmel	FBgn0003345	CG8544		NA	5	1	NA	1	0	0	1	0	0	0
2R	10647765	10647771	7	FBgn0033540	FBtr0088212	Elp2	C;C	C	C	0.534039	0.0172181	Elp2	Dmel	FBgn0033540	CG11887	CG1187	NA	5	1	NA	1	0	0	0	0	1	0
2L	13223396	13223402	7	FBgn0032488	FBtr0080445	CG16812	C;C	C	C	1	0.0141244	CG16812	Dmel	FBgn0032488	CG16812		NA	NA	1	NA	NA	0	0	0	0	1	0
2R	13247324	13247330	7	FBgn0002789	FBtr0087745	Mp20	C;C	C	C	0.534039	0.00947391	Mp20	Dmel	FBgn0002789	CG4696		NA	NA	1	NA	NA	0	0	0	1	0	0
3L	7269793	7269799	7	FBgn0035756	FBtr0290001	unc-13-4A	C;C	C	C	1	0.00837548	unc-13-4A	Dmel	FBgn0035756	CG32381	CG14833,CG8608,CG14832,CG14831	NA	NA	1	NA	NA	0	0	0	0	0	0
X	6761126	6761132	7	FBgn0029899	FBtr0070962	CG14438	C;C	C	C	0.534039	0.0280964	sov	Dmel	FBgn0287725	CG14438		NA	NA	1	NA	NA	0	0	1	0	0	0
X	5316595	5316601	7	FBgn0029754	FBtr0301881	CG15930	C;C	C	C	0.651555	0.0510148	CG15930	Dmel	FBgn0029754	CG15930		NA	NA	1	NA	NA	0	0	0	0	1	0
3L	16624359	16624365	7	FBgn0000017	FBtr0330134	Abl	C;C	C	C	1	0.112623	Abl	Dmel	FBgn0000017	CG4032		NA	NA	1	NA	NA	0	0	0	0	0	0
3L	6257604	6257610	7	FBgn0035697	FBtr0077009	CG10163	C;C	C	C	0.651555	0.0111564	CG10163	Dmel	FBgn0035697	CG10163		NA	NA	1	NA	NA	0	0	0	0	0	0
X	1693412	1693418	7	FBgn0029588	FBtr0089694	CG14798	C;C	C	C	0.534039	0.00258505	CR14798	Dmel	FBgn0029588	CR14798	CG14798	NA	NA	1	NA	NA	0	0	0	0	0	0
3R	25279762	25279768	7	FBgn0039312	FBtr0084864	CG10514	C;C	C	C	0.534039	0.0465776	CG10514	Dmel	FBgn0039312	CG10514		NA	NA	1	NA	NA	0	0	0	0	0	1
2R	7683103	7683109	7	FBgn0033212	FBtr0332911	LRR	C;C	C	C	0.534039	0.044563	LRR	Dmel	FBgn0033212	CG1399	CG1576	NA	NA	1	NA	NA	0	0	0	0	0	0
3L	8109782	8109788	7	FBgn0028379	FBtr0076683	fan	C;C	C	C	0.534039	0.00504506	fan	Dmel	FBgn0028379	CG7919		NA	NA	1	NA	NA	0	1	0	0	0	0
2R	12969058	12969064	7	FBgn0005624	FBtr0087798	Psc	C;C	C	C	1	0.0589602	Psc	Dmel	FBgn0005624	CG3886		NA	NA	1	NA	NA	0	0	1	0	0	0
3R	18020443	18020449	7	FBgn0000477	FBtr0083538	DNaseII	C;C	C	C	0.534039	0.0143065	DNaseII	Dmel	FBgn0000477	CG7780		NA	NA	1	NA	NA	0	0	0	0	0	0
4	474907	474913	7	FBgn0039908	FBtr0300344	Asator	C;C	C	C	1	0.158511	Asator	Dmel	FBgn0039908	CG11533		3	NA	1	1	NA	0	0	0	0	0	0
mitochondrion_genome	5452	5458	7	FBgn0013676	FBtr0100868	mt:CoIII	C;C	C	C	0.651555	0.0576779	mt:CoIII	Dmel	FBgn0013676	CG34074		NA	NA	1	NA	NA	0	1	0	0	0	0
X	15705423	15705429	7	FBgn0030671	FBtr0074054	CG8134	C;C	C	C	1	0.00414848	CG8134	Dmel	FBgn0030671	CG8134		NA	NA	1	NA	NA	0	0	0	0	0	0
2R	14352708	14352714	7	FBgn0033924	FBtr0087546	CG8613	C;C	C	C	0.534039	0.0574832	CG8613	Dmel	FBgn0033924	CG8613		NA	NA	1	NA	NA	0	0	0	0	0	0
X	8436079	8436085	7	FBgn0030037	FBtr0071246	Miga	C;C	C	C	0.534039	0.0181009	Miga	Dmel	FBgn0030037	CG12125		NA	NA	1	NA	NA	0	0	0	0	0	0
X	14235480	14235486	7	FBgn0030555	FBtr0073923	Fbxl4	C;C	C	C	0.534039	0.0168388	Fbxl4	Dmel	FBgn0030555	CG1839		NA	NA	1	NA	NA	0	0	0	0	0	0
X	18872893	18872899	7	FBgn0085430	FBtr0112653	CG34401	C;C	C	C	0.534039	0.0186481	Dora	Dmel	FBgn0085430	CG34401	CG32542,CG17757,CG7307,CG7317,CG15037	NA	NA	1	NA	NA	0	0	0	0	1	0
2L	18204863	18204869	7	FBgn0261804	FBtr0303280	CG42750	C;C	C	C	0.534039	0.00144038	CG42750	Dmel	FBgn0261804	CG42750	CG42400,CG31786,CG15157,CG31746,CG15158,CG7198,CG7167	NA	5	1	NA	1	0	0	0	0	0	0
3L	5344975	5344981	7	FBgn0016031	FBtr0077159	lama	C;C	C	C	1	0.0554079	lama	Dmel	FBgn0016031	CG10645		NA	NA	1	NA	NA	0	0	0	0	0	0
3R	8836589	8836595	7	FBgn0262614	FBtr0305303	pyd	C;3	C	3	0.651555	0.0242035	pyd	Dmel	FBgn0262614	CG43140	CG31349,CG9731,CG9763,CG9729,CG12409,CG11962,CG11782	3	NA	1	1	NA	0	0	0	0	0	0
3L	4568687	4568693	7	FBgn0260657	FBtr0333585	CG42540	C;C	C	C	0.534039	0.0350925	CG42540	Dmel	FBgn0260657	CG42540	CG13719,CG32245,CG7468,CG13718	NA	NA	1	NA	NA	0	1	0	0	0	0
X	19253939	19253945	7	FBgn0031006	FBtr0343635	rictor	C;C	C	C	0.534039	0.00697716	rictor	Dmel	FBgn0031006	CG8002		NA	NA	1	NA	NA	0	0	0	0	0	0
3R	24541496	24541502	7	FBgn0039207	FBtr0089906	CG5789	C;C	C	C	0.534039	0.000627796	Cftr	Dmel	FBgn0039207	CG5789		NA	NA	1	NA	NA	0	1	0	0	0	0
3R	22113772	22113778	7	FBgn0051164	FBtr0084193	Ir94a	C;C	C	C	1	0.051798	Ir94a	Dmel	FBgn0051164	CG31164		NA	NA	1	NA	NA	0	1	0	0	0	0
3R	29792131	29792137	7	FBgn0001297	FBtr0339165	kay	C;C	C	C	0.534039	0.0170157	kay	Dmel	FBgn0001297	CG33956	CG15507,CG15509	3	NA	1	1	NA	0	0	1	0	0	0
3R	30165212	30165218	7	FBgn0051030	FBtr0085579	CG31030	C;C	C	C	0.534039	0.000988708	CG31030	Dmel	FBgn0051030	CG31030	CG2176	3	NA	1	1	NA	0	1	0	0	0	0
2R	9893161	9893167	7	FBgn0285892	FBtr0300920	tea	C;C	C	C	1	0.0263883	tea	Dmel	FBgn0285892	CG30007	CG12138	NA	NA	1	NA	NA	0	0	0	0	1	0
2L	9965267	9965273	7	FBgn0015664	FBtr0079889	Dref	C;C	C	C	0.534039	0.0924061	Dref	Dmel	FBgn0015664	CG5838		NA	NA	1	NA	NA	0	0	1	0	1	0
3L	2775089	2775095	7	FBgn0044452	FBtr0072970	Atg2	C;C	C	C	0.651555	0.0247922	Atg2	Dmel	FBgn0044452	CG1241		NA	NA	1	NA	NA	0	0	0	0	0	0
3R	25068303	25068309	7	FBgn0011336	FBtr0084786	Stt3B	C;C	C	C	1	0.10756	Stt3B	Dmel	FBgn0011336	CG7748		NA	NA	1	NA	NA	0	1	0	0	0	0
2R	24771991	24771997	7	FBgn0035060	FBtr0072433	Eps-15	C;C	C	C	1	0.0987356	Eps-15	Dmel	FBgn0035060	CG16932		NA	NA	1	NA	NA	0	0	0	0	0	0
2R	22664111	22664117	7	FBgn0034761	FBtr0309802	CG4250	C;C	C	C	1	0.0530447	CG4250	Dmel	FBgn0034761	CG4250		NA	NA	1	NA	NA	0	1	0	0	1	0
X	11575295	11575301	7	FBgn0030314	FBtr0073512	CG11696	C;C	C	C	1	0.0046441	CG11696	Dmel	FBgn0030314	CG11696		NA	NA	1	NA	NA	0	0	1	0	0	0
X	7955118	7955124	7	FBgn0029986	FBtr0071127	CG15332	C;C	C	C	1	0.0282549	CG15332	Dmel	FBgn0029986	CG15332		NA	NA	1	NA	NA	0	0	0	0	0	0
2L	5994211	5994217	7	FBgn0031759	FBtr0307070	lid	C;C	C	C	0.534039	0.190267	Kdm5	Dmel	FBgn0031759	CG9088		NA	NA	1	NA	NA	0	0	1	0	0	0
3L	4807264	4807270	7	FBgn0042131	FBtr0073361	CG18808	C;C	C	C	1	0.0172688	CG18808	Dmel	FBgn0042131	CG18808		NA	NA	1	NA	NA	0	0	0	0	0	0
2R	20267696	20267702	7	FBgn0034493	FBtr0339542	CG8908	C;C	C	C	0.651555	0.0460814	CG8908	Dmel	FBgn0034493	CG8908		NA	NA	1	NA	NA	0	1	0	0	0	0
3L	18808124	18808130	7	FBgn0036814	FBtr0332801	CG14073	C;C	C	C	0.534039	0.00712476	CG14073	Dmel	FBgn0036814	CG14073		NA	NA	1	NA	NA	0	0	0	0	0	0
2R	19036306	19036312	7	FBgn0034413	FBtr0086597	CG15115	C;C	C	C	0.651555	0.00116392	CG15115	Dmel	FBgn0034413	CG15115		NA	NA	1	NA	NA	0	1	0	0	0	0
2L	21513113	21513119	7	FBgn0053878	FBtr0091882	His2B:CG33878	C;C	C	C	0.534039	0.0633356	His2B:CG33878	Dmel	FBgn0053878	CG33878		NA	NA	1	NA	NA	0	0	0	0	0	0
X	2053951	2053957	7	FBgn0025632	FBtr0340109	CG4313	C;C	C	C	0.651555	0.00170337	CG4313	Dmel	FBgn0025632	CG4313		NA	NA	1	NA	NA	0	1	0	0	0	0
X	16715223	16715229	7	FBgn0085354	FBtr0112527	CG34325	C;C	C	C	1	0.0107647	CG34325	Dmel	FBgn0085354	CG34325	CG18358	NA	NA	1	NA	NA	0	0	0	0	0	0
3R	18047266	18047272	7	FBgn0010389	FBtr0083550	htl	C;C	C	C	0.534039	0.0188054	htl	Dmel	FBgn0010389	CG7223		3	NA	1	1	NA	0	1	0	0	1	0
X	786169	786175	7	FBgn0086368	FBtr0070139	tw	C;C	C	C	0.534039	0.153142	tw	Dmel	FBgn0086368	CG12311		NA	NA	1	NA	NA	0	1	0	1	0	0
3L	8209988	8209994	7	FBgn0052364	FBtr0076720	tut	C;C	C	C	0.534039	0.0238419	tut	Dmel	FBgn0052364	CG32364		NA	NA	1	NA	NA	1	0	0	0	0	0
X	745385	745391	7	FBgn0021764	FBtr0302260	sdk	C;C	C	C	0.534039	0.0124922	sdk	Dmel	FBgn0021764	CG5227		NA	NA	1	NA	NA	0	1	0	0	0	0
3R	9241880	9241886	7	FBgn0260935	FBtr0081986	Vps15	C;C	C	C	0.534039	0.0307703	Vps15	Dmel	FBgn0260935	CG9746		NA	NA	1	NA	NA	0	0	0	0	0	0
3R	8822652	8822658	7	FBgn0040532	FBtr0081920	CG8369	C;C	C	C	0.534039	0.00250781	CG8369	Dmel	FBgn0040532	CG8369		NA	NA	1	NA	NA	0	0	0	0	0	0
2L	21467601	21467607	7	FBgn0053896	FBtr0091900	His2B:CG33896	C;C	C	C	0.534039	0.0633356	His2B:CG33896	Dmel	FBgn0053896	CG33896		NA	NA	1	NA	NA	0	0	0	0	0	0
X	14844123	14844129	7	FBgn0030586	FBtr0073987	CG12539	C;C	C	C	0.534039	0.008427	CG12539	Dmel	FBgn0030586	CG12539		NA	NA	1	NA	NA	0	0	0	0	0	0
2L	8941025	8941031	7	FBgn0032076	FBtr0340263	CG9510	C;C	C	C	0.534039	0.0549384	Argl	Dmel	FBgn0032076	CG9510	CG33085	NA	NA	1	NA	NA	0	0	0	0	0	0
3L	6692277	6692283	7	FBgn0035710	FBtr0076959	SP1173	C;C	C	C	1	0.0212596	SP1173	Dmel	FBgn0035710	CG10121		NA	NA	1	NA	NA	0	1	0	0	0	0
2L	22167688	22167694	7	FBgn0032979	FBtr0085964	Clamp	C;C	C	C	1	0.00315234	Clamp	Dmel	FBgn0032979	CG1832		NA	NA	1	NA	NA	0	0	1	0	0	0
3L	7640173	7640179	7	FBgn0053276	FBtr0114530	Urm1	C;C	C	C	1	0.0384287	Urm1	Dmel	FBgn0053276	CG33276		NA	NA	1	NA	NA	0	0	0	0	0	0
3L	1796571	1796577	7	FBgn0011573	FBtr0072777	Cdc37	C;C	C	C	1	0.0590945	Cdc37	Dmel	FBgn0011573	CG12019		NA	5	1	NA	1	0	0	0	0	1	0
2L	12708182	12708188	7	FBgn0032453	FBtr0080398	CG6180	C;C	C	C	0.651555	0.0409559	CG6180	Dmel	FBgn0032453	CG6180		NA	NA	1	NA	NA	0	0	0	0	0	0
X	2935360	2935366	7	FBgn0029642	FBtr0070551	CG3592	C;C	C	C	0.534039	0.112562	CG3592	Dmel	FBgn0029642	CG3592		NA	NA	1	NA	NA	0	1	0	0	0	0
2L	16266644	16266650	7	FBgn0001994	FBtr0080854	crp	C;C	C	C	0.651555	0.0109483	crp	Dmel	FBgn0001994	CG7664		3	NA	1	1	NA	0	0	1	0	1	0
X	6298334	6298340	7	FBgn0029861	FBtr0070899	CG3815	C;C	C	C	0.651555	0.0516387	CG3815	Dmel	FBgn0029861	CG3815		NA	NA	1	NA	NA	0	0	1	0	0	0
2L	13533038	13533044	7	FBgn0053645	FBtr0332507	CG33645	C;C	C	C	1	0.023019	CG33645	Dmel	FBgn0053645	CG33645		NA	NA	1	NA	NA	0	0	0	0	0	0
2R	16999295	16999301	7	FBgn0034175	FBtr0087060	ste24b	C;C	C	C	0.651555	0.00845155	ste24b	Dmel	FBgn0034175	CG9001		NA	NA	1	NA	NA	0	1	0	0	0	0
2R	12451253	12451259	7	FBgn0033739	FBtr0113074	Dyb	C;C	C	C	1	0.16864	Dyb	Dmel	FBgn0033739	CG8529		NA	NA	1	NA	NA	0	0	0	1	0	0
X	468115	468121	7	FBgn0010019	FBtr0070099	Cyp4g1	C;C	C	C	0.651555	0.1812	Cyp4g1	Dmel	FBgn0010019	CG3972		NA	NA	1	NA	NA	0	0	0	0	0	0
2L	20256708	20256714	7	FBgn0259998	FBtr0345635	CG17571	C;C	C	C	1	0.154983	CG17571	Dmel	FBgn0259998	CG17571		NA	NA	1	NA	NA	0	0	0	0	0	0
2L	13179529	13179535	7	FBgn0032477	FBtr0080436	CG5287	C;C	C	C	0.651555	0.0697635	Alg7	Dmel	FBgn0032477	CG5287		NA	NA	1	NA	NA	0	1	0	0	0	0
2L	11938014	11938020	7	FBgn0026390	FBtr0080280	Or33c	C;C	C	C	1	0.0593413	Or33c	Dmel	FBgn0026390	CG5006		NA	NA	1	NA	NA	0	1	0	0	0	0
3L	18932795	18932801	7	FBgn0052204	FBtr0113429	CG32204	C;C	C	C	1	0.00109731	CG32204	Dmel	FBgn0052204	CG32204		NA	NA	1	NA	NA	0	1	0	0	1	0
3R	25915829	25915835	7	FBgn0250757	FBtr0290137	CG42235	C;C	C	C	0.534039	0.0607239	CG42235	Dmel	FBgn0250757	CG42235	CG8966,CG8957,CG8934,CG8932,CG31090,CG8951,CG14539	NA	NA	1	NA	NA	0	1	0	0	1	0
X	2131043	2131049	7	FBgn0004861	FBtr0070432	ph-p	C;C	C	C	0.534039	0.150618	ph-p	Dmel	FBgn0004861	CG18412	CG18414	NA	5	1	NA	1	0	0	1	0	1	0
2L	21774201	21774207	7	FBgn0051612	FBtr0300999	CG31612	C;C	C	C	1	0.0438048	CG31612	Dmel	FBgn0051612	CG31612	CG11632,CG11631	NA	NA	1	NA	NA	0	0	1	0	0	0
2R	7517735	7517741	7	FBgn0033186	FBtr0088960	CG1602	C;C	C	C	0.534039	0.0382531	CG1602	Dmel	FBgn0033186	CG1602		NA	NA	1	NA	NA	0	0	1	0	0	0
3R	8028688	8028694	7	FBgn0001255	FBtr0310412	ImpE3	C;C	C	C	1	0.000717232	ImpE3	Dmel	FBgn0001255	CG2723	CG11046	NA	NA	1	NA	NA	0	0	0	0	0	0
3R	29203363	29203369	7	FBgn0039651	FBtr0085406	Cyt-c1L	C;C	C	C	0.651555	0.0143332	Cyt-c1L	Dmel	FBgn0039651	CG14508		NA	NA	1	NA	NA	0	1	0	0	0	0
3L	19797683	19797689	7	FBgn0261283	FBtr0074873	SREBP	C;C	C	C	1	0.331381	SREBP	Dmel	FBgn0261283	CG8522		NA	NA	1	NA	NA	0	1	1	0	0	0
2L	15615844	15615850	7	FBgn0028948	FBtr0080782	CG15253	C;C	C	C	0.651555	0.0138223	CG15253	Dmel	FBgn0028948	CG15253		NA	NA	1	NA	NA	0	0	0	0	0	0
2R	9109111	9109117	7	FBgn0033377	FBtr0088630	Pmm45A	C;C	C	C	1	0.00357818	Pgm2a	Dmel	FBgn0033377	CG8073		NA	NA	1	NA	NA	0	0	0	0	0	0
2L	10417527	10417533	7	FBgn0032243	FBtr0331642	Klp31E	C;C	C	C	1	0.0313988	Klp31E	Dmel	FBgn0032243	CG5300		NA	NA	1	NA	NA	0	0	0	0	0	0
X	12109961	12109967	7	FBgn0030376	FBtr0300918	CG2750	C;C	C	C	0.534039	0.0858933	CG2750	Dmel	FBgn0030376	CG2750		NA	NA	1	NA	NA	0	0	0	0	0	0
X	21363805	21363811	7	FBgn0024182	FBtr0100536	waw	C;C	C	C	0.534039	0.0760734	waw	Dmel	FBgn0024182	CG1410	CG32527	NA	NA	1	NA	NA	1	0	0	0	0	0
2R	17571619	17571625	7	FBgn0040294	FBtr0086828	POSH	C;C	C	C	1	0.0177559	POSH	Dmel	FBgn0040294	CG4909		NA	NA	1	NA	NA	0	0	0	0	0	0
3R	13680571	13680577	7	FBgn0038168	FBtr0082848	omd	C;C	C	C	1	0.00943138	omd	Dmel	FBgn0038168	CG9591		NA	NA	1	NA	NA	0	0	0	0	1	0
X	10873021	10873027	7	FBgn0030245	FBtr0073408	CG1637	C;C	C	C	0.534039	0.0154788	CG1637	Dmel	FBgn0030245	CG1637		NA	NA	1	NA	NA	0	0	0	0	1	0
2R	17002364	17002370	7	FBgn0034177	FBtr0087057	AsnRS-m	C;C	C	C	1	0.0561516	AsnRS-m	Dmel	FBgn0034177	CG6796		NA	NA	1	NA	NA	0	0	0	0	1	0
X	21052688	21052694	7	FBgn0031149	FBtr0345923	Stt3A	C;C	C	C	1	0.00295273	Stt3A	Dmel	FBgn0031149	CG1518		NA	NA	1	NA	NA	0	1	0	0	1	0
2L	3363058	3363064	7	FBgn0085423	FBtr0112638	CG34394	C;C	C	C	1	0.0253678	GramD1B	Dmel	FBgn0085423	CG34394	CG3304,CG15411	NA	NA	1	NA	NA	0	1	0	0	0	0
3R	11554469	11554475	7	FBgn0037910	FBtr0082409	CG14708	C;C	C	C	0.651555	0.00224808	CG14708	Dmel	FBgn0037910	CG14708		NA	NA	1	NA	NA	0	0	0	0	0	0
2L	19485826	19485832	7	FBgn0032788	FBtr0081240	CG13084	C;C	C	C	0.534039	0.00104232	CG13084	Dmel	FBgn0032788	CG13084		NA	NA	1	NA	NA	0	0	0	0	0	0
3L	7328196	7328202	7	FBgn0035763	FBtr0076884	CG8602	C;C	C	C	1	0.0161103	mrva	Dmel	FBgn0035763	CG8602		NA	NA	1	NA	NA	0	1	0	0	0	0
2R	4698767	4698773	7	FBgn0026401	FBtr0301455	Nipped-B	C;C	C	C	0.534039	0.081018	Nipped-B	Dmel	FBgn0026401	CG17704	CG40281	NA	NA	1	NA	NA	0	0	0	0	0	0
2L	20603841	20603847	7	FBgn0051677	FBtr0081407	CG31677	C;C	C	C	1	0.000384685	CG31677	Dmel	FBgn0051677	CG31677		NA	NA	1	NA	NA	0	0	0	0	0	0
3L	13515206	13515212	7	FBgn0036376	FBtr0075813	Liprin-beta	C;C	C	C	1	0.0897963	Liprin-beta	Dmel	FBgn0036376	CG10743		NA	NA	1	NA	NA	0	0	0	0	0	0
X	1214672	1214678	7	FBgn0040366	FBtr0345522	CG11398	C;C	C	C	0.534039	0.0171897	CG11398	Dmel	FBgn0040366	CG11398		NA	NA	1	NA	NA	0	0	1	0	0	0
2R	13663300	13663306	7	FBgn0033862	FBtr0087651	CG6209	C;C	C	C	0.651555	0.00121533	CG6209	Dmel	FBgn0033862	CG6209		NA	NA	1	NA	NA	0	0	0	0	0	0
X	13757925	13757931	7	FBgn0020909	FBtr0073820	Rtc1	C;C	C	C	1	0.0625214	Rtc1	Dmel	FBgn0020909	CG11130		NA	NA	1	NA	NA	0	0	0	0	1	0
X	5690883	5690889	7	FBgn0000394	FBtr0340465	cv	C;C	C	C	1	0.000446381	cv	Dmel	FBgn0000394	CG12410		NA	NA	1	NA	NA	0	0	0	0	0	0
3R	7692751	7692757	7	FBgn0051146	FBtr0081541	Nlg1	C;C	C	C	1	0.00226393	Nlg1	Dmel	FBgn0051146	CG31146	CG14596,CG12148	NA	NA	1	NA	NA	0	1	0	0	0	0
X	15800489	15800495	7	FBgn0030694	FBtr0340114	CG15602	C;C	C	C	1	0.00308084	CG15602	Dmel	FBgn0030694	CG15602		NA	NA	1	NA	NA	0	0	0	0	0	0
2R	14384779	14384785	7	FBgn0033932	FBtr0087485	Dh44-R1	C;C	C	C	0.534039	0.0594807	Dh44-R1	Dmel	FBgn0033932	CG8422		NA	NA	1	NA	NA	0	1	0	0	0	0
3R	4707303	4707309	7	FBgn0263346	FBtr0308852	CG43427	C;C	C	C	0.651555	0.0235699	smash	Dmel	FBgn0263346	CG43427	CG31531,CG31534,CG14653,CG1054,CG18253,CG1055	3	NA	1	1	NA	0	0	0	0	0	0
2R	9719720	9719726	7	FBgn0259678	FBtr0299929	sqa	C;C	C	C	0.651555	8.64137e-06	sqa	Dmel	FBgn0259678	CG42347	CG30004,CG1776	NA	NA	1	NA	NA	0	0	0	0	0	0
X	7914702	7914708	7	FBgn0029976	FBtr0071092	snz	C;C	C	C	1	0.00795674	snz	Dmel	FBgn0029976	CG1514		NA	NA	1	NA	NA	0	1	0	0	0	0
3R	19227279	19227285	7	FBgn0038690	FBtr0083744	CG11703	C;C	C	C	0.534039	0.00825917	CG11703	Dmel	FBgn0038690	CG11703		NA	NA	1	NA	NA	0	1	0	0	0	0
X	14229439	14229445	7	FBgn0259166	FBtr0299615	CG42271	C;C	C	C	0.534039	0.00504028	CG42271	Dmel	FBgn0259166	CG42271	CG33248,CG33249,CG1846	NA	NA	1	NA	NA	0	0	0	0	0	0
3L	20433246	20433252	7	FBgn0284421	FBtr0078193	Psn	C;C	C	C	1	0.0419779	Psn	Dmel	FBgn0284421	CG18803	CG5868	NA	5	1	NA	1	0	1	0	0	0	0
3R	16090444	16090450	7	FBgn0026059	FBtr0083229	Mhcl	C;C	C	C	0.534039	0.0683462	Mhcl	Dmel	FBgn0026059	CG31045	CG10224,CG10218	NA	NA	1	NA	NA	0	0	0	0	0	0
3R	5534337	5534343	7	FBgn0010051	FBtr0078686	Itp-r83A	C;C	C	C	1	0.00870749	Itpr	Dmel	FBgn0010051	CG1063		NA	NA	1	NA	NA	0	1	0	0	0	0
2L	13379974	13379980	7	FBgn0025724	FBtr0080469	beta'COP	C;C	C	C	0.534039	0.0584291	beta'COP	Dmel	FBgn0025724	CG6699		NA	NA	1	NA	NA	0	0	0	0	0	0
3L	13913984	13913990	7	FBgn0026376	FBtr0330186	Rgl	C;C	C	C	1	0.15292	Rgl	Dmel	FBgn0026376	CG8865		NA	NA	1	NA	NA	0	0	0	0	0	0
3R	14701308	14701314	7	FBgn0262127	FBtr0344383	kibra	C;C	C	C	0.651555	0.025273	kibra	Dmel	FBgn0262127	CG33967	CG7552,CG12600	NA	NA	1	NA	NA	0	0	0	0	0	0
X	15783465	15783471	7	FBgn0030691	FBtr0074192	Efhc1.1	C;C	C	C	0.534039	0.0101968	Efhc1.1	Dmel	FBgn0030691	CG8959		NA	NA	1	NA	NA	0	0	0	0	0	0
2R	17417275	17417281	7	FBgn0021818	FBtr0340214	cnk	C;C	C	C	0.534039	0.0332389	cnk	Dmel	FBgn0286070	CG6556		NA	NA	1	NA	NA	0	0	0	0	1	0
3R	23064142	23064148	7	FBgn0039048	FBtr0303508	CG17111	C;C	C	C	0.534039	0.0505359	CG17111	Dmel	FBgn0039048	CG17111		NA	5	1	NA	1	0	1	0	0	0	0
3R	10364128	10364134	7	FBgn0020379	FBtr0337104	Rfx	C;C	C	C	0.534039	0.00549163	Rfx	Dmel	FBgn0020379	CG6312		NA	NA	1	NA	NA	0	0	1	0	0	0
2R	6691787	6691793	7	FBgn0033092	FBtr0086121	CG9422	C;C	C	C	1	0.00952856	Rpp25	Dmel	FBgn0033092	CG9422		NA	NA	1	NA	NA	0	0	0	0	0	0
2R	17733991	17733997	7	FBgn0085224	FBtr0112388	CG34195	C;C	C	C	0.651555	0.00945784	CG34195	Dmel	FBgn0085224	CG34195	CG4989	NA	NA	1	NA	NA	0	0	0	0	0	0
3R	15353059	15353065	7	FBgn0038324	FBtr0083089	CG5038	C;C	C	C	0.534039	0.0348966	CG5038	Dmel	FBgn0038324	CG5038		NA	NA	1	NA	NA	0	1	0	0	0	0
2R	11342241	11342247	7	FBgn0011555	FBtr0088162	thetaTry	C;C	C	C	0.651555	0.00405918	thetaTry	Dmel	FBgn0011555	CG12385		NA	NA	1	NA	NA	0	0	0	0	0	0
2L	3717397	3717403	7	FBgn0040104	FBtr0077539	lectin-24A	C;C	C	C	0.651555	0.0746251	lectin-24A	Dmel	FBgn0040104	CG3410		NA	NA	1	NA	NA	0	0	0	0	0	0
X	3946975	3946981	7	FBgn0052783	FBtr0344826	CG32783	C;C	C	C	0.534039	0.0417903	Gem4c	Dmel	FBgn0052783	CG32783		NA	NA	1	NA	NA	0	0	0	0	0	0
X	1323166	1323172	7	FBgn0004650	FBtr0070207	fs(1)N	C;C	C	C	0.534039	0.00474803	fs(1)N	Dmel	FBgn0004650	CG11411		NA	NA	1	NA	NA	0	0	0	0	0	0
3R	19243969	19243975	7	FBgn0038693	FBtr0301692	unc79	C;C	C	C	0.534039	0.124309	unc79	Dmel	FBgn0038693	CG5237		NA	NA	1	NA	NA	0	0	0	0	0	0
2L	13365536	13365542	7	FBgn0022069	FBtr0080473	Nnp-1	C;C	C	C	0.534039	0.0950053	Nnp-1	Dmel	FBgn0022069	CG12396		NA	NA	1	NA	NA	0	0	0	0	1	0
3L	19502474	19502480	7	FBgn0036877	FBtr0074978	CG9452	C;C	C	C	1	0.062167	CG9452	Dmel	FBgn0036877	CG9452		NA	NA	1	NA	NA	0	0	0	0	0	0
2L	16472547	16472553	7	FBgn0005677	FBtr0080877	dac	C;C	C	C	0.534039	0.0785911	dac	Dmel	FBgn0005677	CG4952		NA	NA	1	NA	NA	0	0	1	0	0	0
2L	12063960	12063966	7	FBgn0032405	FBtr0302029	firl	C;C	C	C	1	0.090693	firl	Dmel	FBgn0032405	CG14946		NA	NA	1	NA	NA	0	1	0	0	0	0
X	1042984	1042990	7	FBgn0003638	FBtr0305651	su(w[a])	C;C	C	C	0.651555	0.0165366	su(w[a])	Dmel	FBgn0003638	CG3019		3	5	1	1	1	1	1	0	0	1	0
3L	9474256	9474262	7	FBgn0266101	FBtr0343558	CG44838	C;C	C	C	1	0.0876567	CG44838	Dmel	FBgn0266101	CG44838	CG32043,CG14180,CG18632,CG3628	NA	NA	1	NA	NA	0	0	0	0	0	0
3R	10710494	10710500	7	FBgn0037826	FBtr0082317	CG14689	C;C	C	C	1	0.0111864	CG14689	Dmel	FBgn0037826	CG14689		NA	NA	1	NA	NA	0	0	0	0	0	0
X	10768838	10768844	7	FBgn0030228	FBtr0071497	BTBD9	C;C	C	C	0.651555	0.0754114	BTBD9	Dmel	FBgn0030228	CG1826		NA	NA	1	NA	NA	0	0	0	0	0	0
2L	11133049	11133055	7	FBgn0032348	FBtr0080200	CG4751	C;C	C	C	1	0.00189978	CG4751	Dmel	FBgn0032348	CG4751		NA	NA	1	NA	NA	0	0	0	0	0	0
2R	13848888	13848894	7	FBgn0050484	FBtr0331382	CG30484	C;C	C	C	0.651555	0.0123348	CG30484	Dmel	FBgn0050484	CG30484	CG13342	NA	NA	1	NA	NA	0	0	0	0	0	0
X	11445005	11445011	7	FBgn0030300	FBtr0073497	Sk1	C;C	C	C	0.534039	0.0195401	Sk1	Dmel	FBgn0030300	CG1747		NA	NA	1	NA	NA	0	0	0	0	0	0
2R	14992784	14992790	7	FBgn0033990	FBtr0087421	CG10265	C;C	C	C	0.534039	0.0739579	CG10265	Dmel	FBgn0033990	CG10265	CG30474	3	NA	1	1	NA	0	0	0	0	0	0
X	13832510	13832516	7	FBgn0052626	FBtr0073833	AMPdeam	C;C	C	C	0.651555	0.0112307	AMPdeam	Dmel	FBgn0052626	CG32626	CG11058,CG15762,CG11065	3	NA	1	1	NA	0	0	0	0	0	0
3L	15830388	15830394	7	FBgn0040230	FBtr0332133	dbo	C;C	C	C	0.651555	0.0129806	dbo	Dmel	FBgn0040230	CG6224		NA	NA	1	NA	NA	0	0	0	0	0	0
X	642080	642086	7	FBgn0003575	FBtr0340082	su(sable)	C;C	C	C	0.651555	0.0381973	su(sable)	Dmel	FBgn0003575	CG6222		NA	NA	1	NA	NA	1	0	0	0	0	0
3R	29026605	29026611	7	FBgn0039622	FBtr0085344	eIF4E6	C;C	C	C	0.651555	0.0118674	eIF4E6	Dmel	FBgn0039622	CG1442		NA	NA	1	NA	NA	1	0	0	0	1	0
3R	10074697	10074703	7	FBgn0037786	FBtr0309853	CG5361	C;C	C	C	0.534039	0.00554195	Alp13	Dmel	FBgn0037786	CG5361		NA	NA	1	NA	NA	0	0	0	0	0	0
X	10490880	10490886	7	FBgn0085443	FBtr0336902	spri	C;C	C	C	1	0.00243557	spri	Dmel	FBgn0085443	CG34414	CG32680,CG33175,CG15301,CG12638,CG15297,CG15298,CG15299,CG15300,CG32674	3	NA	1	1	NA	0	0	0	0	0	0
3R	10755348	10755354	7	FBgn0037829	FBtr0335208	CG14691	C;C	C	C	1	0.00105919	CG14691	Dmel	FBgn0037829	CG14691		NA	NA	1	NA	NA	0	1	0	0	1	0
2L	7016158	7016164	7	FBgn0000053	FBtr0339663	ade3	C;C	C	C	0.651555	0.0162772	Gart	Dmel	FBgn0000053	CG31628	CG8761	NA	NA	1	NA	NA	0	0	0	0	0	0
3R	25061422	25061428	7	FBgn0266719	FBtr0334505	stac	C;C	C	C	0.534039	0.180155	stac	Dmel	FBgn0266719	CG34349	CG34037,CG11819	NA	NA	1	NA	NA	0	0	0	0	0	0
4	1070797	1070803	7	FBgn0087002	FBtr0345296	apolpp	C;C	C	C	0.534039	0.00634491	apolpp	Dmel	FBgn0087002	CG11064		NA	NA	1	NA	NA	0	0	0	0	0	0
3R	8011575	8011581	7	FBgn0037539	FBtr0081820	CG10435	C;C	C	C	1	0.00883909	CG10435	Dmel	FBgn0037539	CG10435		NA	NA	1	NA	NA	0	0	0	0	0	0
2L	15092575	15092581	7	FBgn0028879	FBtr0080702	CG15270	C;C	C	C	0.651555	0.0484017	CG15270	Dmel	FBgn0028879	CG15270		NA	NA	1	NA	NA	0	1	0	0	0	0
3L	8343033	8343039	7	FBgn0011762	FBtr0076603	DNApol-alpha50	C;C	C	C	1	0.00257527	Prim1	Dmel	FBgn0011762	CG7108		NA	NA	1	NA	NA	0	0	0	0	1	0
3L	22503507	22503513	7	FBgn0263036	FBtr0306916	CG43331	C;C	C	C	0.534039	0.00165474	CG43331	Dmel	FBgn0263036	CG43331	CG12377	NA	NA	1	NA	NA	0	1	0	0	0	0
3R	12633920	12633926	7	FBgn0042207	FBtr0082644	CG18530	C;C	C	C	0.534039	0.0918857	CG18530	Dmel	FBgn0042207	CG18530	CG12294	NA	NA	1	NA	NA	0	0	0	0	0	0
2L	192880	192886	7	FBgn0016977	FBtr0078122	spen	C;C	C	C	0.651555	0.0103257	spen	Dmel	FBgn0016977	CG18497		NA	NA	1	NA	NA	1	0	0	0	1	0
2L	11936399	11936405	7	FBgn0026391	FBtr0080279	Or33b	C;C	C	C	0.534039	0.147828	Or33b	Dmel	FBgn0026391	CG16961		NA	NA	1	NA	NA	0	1	0	0	1	0
X	10122983	10122989	7	FBgn0083940	FBtr0110783	RhoU	C;C	C	C	1	0.469368	RhoU	Dmel	FBgn0083940	CG34104	CG12094,CG12102	NA	NA	1	NA	NA	0	0	0	0	1	0
2L	12139678	12139684	7	FBgn0032416	FBtr0080337	Gr33a	C;C	C	C	0.651555	0.0324636	Gr33a	Dmel	FBgn0032416	CG17213		NA	NA	1	NA	NA	0	1	0	0	0	0
3R	19230187	19230193	7	FBgn0038692	FBtr0083737	CG3773	C;C	C	C	0.534039	0.0131301	Polr2M	Dmel	FBgn0038692	CG3773		NA	NA	1	NA	NA	0	0	0	0	1	0
3L	14010378	14010384	7	FBgn0036398	FBtr0333050	upSET	C;C	C	C	1	0.0125432	upSET	Dmel	FBgn0036398	CG9007		3	NA	1	1	NA	0	0	0	0	0	0
3R	9585296	9585302	7	FBgn0037717	FBtr0082073	CG8301	C;C	C	C	1	0.000610683	CG8301	Dmel	FBgn0037717	CG8301		NA	NA	1	NA	NA	0	0	1	0	0	0
3L	11363412	11363418	7	FBgn0036155	FBtr0333387	CG6163	C;C	C	C	0.534039	0.0118633	CG6163	Dmel	FBgn0036155	CG6163		NA	NA	1	NA	NA	0	0	0	0	0	0
3R	21669720	21669726	7	FBgn0259113	FBtr0084115	DNApol-alpha180	C;C	C	C	0.651555	0.00399244	PolA1	Dmel	FBgn0259113	CG6349		NA	NA	1	NA	NA	0	0	0	0	0	0
3R	20571705	20571711	7	FBgn0038803	FBtr0083904	CG5191	C;C	C	C	0.651555	0.00474747	CG5191	Dmel	FBgn0038803	CG5191		NA	NA	1	NA	NA	0	0	0	0	0	0
2R	19646645	19646651	7	FBgn0034462	FBtr0303023	CG15905	C;C	C	C	0.534039	0.0575733	CG15905	Dmel	FBgn0034462	CG15905		3	NA	1	1	NA	0	0	0	0	0	0
3L	4551431	4551437	7	FBgn0035558	FBtr0304987	CG11357	C;C	C	C	0.534039	0.0123146	CG11357	Dmel	FBgn0035558	CG11357		NA	NA	1	NA	NA	0	0	0	0	0	0
X	8133602	8133608	7	FBgn0030004	FBtr0071153	CG10958	C;C	C	C	0.651555	0.0149922	CG10958	Dmel	FBgn0030004	CG10958		NA	NA	1	NA	NA	0	0	0	0	0	0
2R	22784628	22784634	7	FBgn0061435	FBtr0300124	CG30270	C;C	C	C	1	0.115019	CG30270	Dmel	FBgn0061435	CG30270		NA	NA	1	NA	NA	0	0	0	0	0	0
3R	5373448	5373454	7	FBgn0086695	FBtr0078802	hd	C;C	C	C	0.534039	0.0489849	hd	Dmel	FBgn0086695	CG2669		NA	NA	1	NA	NA	0	0	0	0	0	0
3R	23896767	23896773	7	FBgn0016754	FBtr0112888	sba	C;3	C	3	0.651555	0.310729	sba	Dmel	FBgn0016754	CG13598		NA	NA	1	NA	NA	0	0	1	0	0	0
3R	11880367	11880373	7	FBgn0037958	FBtr0082516	CG6962	C;C	C	C	0.651555	0.0374954	CG6962	Dmel	FBgn0037958	CG6962		NA	NA	1	NA	NA	0	1	0	0	0	0
2R	22889790	22889796	7	FBgn0034795	FBtr0071903	MED23	C;C	C	C	0.534039	0.0291149	MED23	Dmel	FBgn0034795	CG3695		NA	NA	1	NA	NA	0	1	0	0	0	0
3R	15766831	15766837	7	FBgn0038357	FBtr0083197	CG5623	C;C	C	C	0.534039	0.0293574	CG5623	Dmel	FBgn0038357	CG5623		NA	NA	1	NA	NA	0	0	0	0	0	0
2R	9991699	9991705	7	FBgn0261014	FBtr0112906	TER94	C;C	C	C	0.651555	0.0627254	TER94	Dmel	FBgn0286784	CG2331		NA	5	1	NA	1	0	0	0	0	1	0
X	8117944	8117950	7	FBgn0029999	FBtr0339695	CG1575	C;C	C	C	1	0.00610777	CG1575	Dmel	FBgn0029999	CG1575		NA	NA	1	NA	NA	0	0	0	0	1	0
3R	18677212	18677218	7	FBgn0038639	FBtr0083689	CG7705	C;C	C	C	1	0.00220698	dind	Dmel	FBgn0286828	CG7705		NA	NA	1	NA	NA	0	1	0	0	0	0
2R	10829879	10829885	7	FBgn0033558	FBtr0339478	CG12344	C;C	C	C	1	0.0126648	CG12344	Dmel	FBgn0033558	CG12344		NA	NA	1	NA	NA	0	1	0	0	0	0
2R	13456181	13456187	7	FBgn0000119	FBtr0087702	arr	C;C	C	C	1	0.00125899	arr	Dmel	FBgn0000119	CG5912		NA	NA	1	NA	NA	0	1	0	0	1	0
X	12707906	12707912	7	FBgn0030417	FBtr0073685	CG15725	C;C	C	C	0.534039	0.00883467	CG15725	Dmel	FBgn0030417	CG15725		NA	5	1	NA	1	0	0	0	0	1	0
2R	17749789	17749795	7	FBgn0034274	FBtr0089545	CG10931	C;C	C	C	0.651555	0.0189312	CG10931	Dmel	FBgn0034274	CG10931		NA	NA	1	NA	NA	0	0	0	0	0	0
2L	19125355	19125361	7	FBgn0086444	FBtr0081163	l(2)37Cb	C;C	C	C	0.651555	0.0369418	l(2)37Cb	Dmel	FBgn0086444	CG10689		NA	NA	1	NA	NA	0	0	0	0	1	0
3R	16486607	16486613	7	FBgn0038439	FBtr0301702	Cad89D	C;C	C	C	1	0.0129007	Cad89D	Dmel	FBgn0038439	CG14900		NA	NA	1	NA	NA	0	1	0	0	0	0
2L	15010735	15010741	7	FBgn0001974	FBtr0080696	l(2)35Bd	C;C	C	C	0.651555	0.00880019	Rnmt	Dmel	FBgn0286027	CG3688		NA	NA	1	NA	NA	1	0	0	0	0	0
2R	21308681	21308687	7	FBgn0261554	FBtr0344188	CG42672	C;C	C	C	1	0.0397283	CG42672	Dmel	FBgn0261554	CG42672	CG30387,CG30386,CG15665,CG10074	NA	NA	1	NA	NA	0	1	0	0	0	0
3L	6717591	6717597	7	FBgn0005626	FBtr0345585	ple	C;C	C	C	0.534039	0.352215	ple	Dmel	FBgn0005626	CG10118		NA	5	1	NA	1	0	0	0	0	0	0
2L	6977645	6977651	7	FBgn0031879	FBtr0307072	uif	C;C	C	C	1	0.0733735	uif	Dmel	FBgn0031879	CG9138		NA	NA	1	NA	NA	0	1	0	0	1	0
3L	1296331	1296337	7	FBgn0262937	FBtr0072663	Rabex-5	C;C	C	C	0.534039	0.0776588	Rabex-5	Dmel	FBgn0262937	CG9139		NA	NA	1	NA	NA	0	0	1	0	0	0
2R	6189295	6189301	7	FBgn0262867	FBtr0086003	Ptr	C;C	C	C	0.651555	0.0296818	Ptr	Dmel	FBgn0262867	CG11212		NA	NA	1	NA	NA	0	1	0	0	0	0
2R	25139101	25139107	7	FBgn0262566	FBtr0304889	CG43106	C;C	C	C	0.651555	0.518196	CG43106	Dmel	FBgn0262566	CG43106		NA	NA	1	NA	NA	0	0	0	0	0	0
X	5066694	5066700	7	FBgn0003028	FBtr0070738	ovo	C;C	C	C	0.534039	0.0059185	ovo	Dmel	FBgn0003028	CG6824	CG15467	NA	NA	1	NA	NA	0	0	1	0	0	0
2R	16950055	16950061	7	FBgn0085444	FBtr0112692	mute	C;C	C	C	0.651555	0.169432	mute	Dmel	FBgn0085444	CG34415	CG33456,CG33455,CG15610	NA	NA	1	NA	NA	0	0	0	0	1	0
2R	18431290	18431296	7	FBgn0284257	FBtr0113361	Ttd14	C;C	C	C	1	0.0373014	Ttd14	Dmel	FBgn0284257	CG30118	CG16859,CG5544	3	NA	1	1	NA	0	0	0	0	0	0
X	10359302	10359308	7	FBgn0028331	FBtr0071470	l(1)G0289	C;C	C	C	0.651555	0.0514694	l(1)G0289	Dmel	FBgn0028331	CG2221		3	NA	1	1	NA	0	1	0	0	1	0
3R	23062281	23062287	7	FBgn0027526	FBtr0084347	Ublcp1	C;C	C	C	0.534039	0.00437345	Ublcp1	Dmel	FBgn0027526	CG6697		NA	NA	1	NA	NA	0	0	0	0	0	0
2R	8928961	8928967	7	FBgn0033352	FBtr0088654	PAN2	C;C	C	C	0.534039	0.00940876	PAN2	Dmel	FBgn0033352	CG8232		NA	NA	1	NA	NA	0	0	0	0	0	0
3L	880396	880402	7	FBgn0035173	FBtr0345005	CG13907	C;C	C	C	0.534039	0.000923784	CG13907	Dmel	FBgn0035173	CG13907		NA	NA	1	NA	NA	0	1	0	0	0	0
2L	5011659	5011665	7	FBgn0031670	FBtr0079000	CG3887	C;C	C	C	0.651555	0.00486634	SelT	Dmel	FBgn0031670	CG3887		NA	NA	1	NA	NA	0	1	0	0	0	0
X	12086743	12086749	7	FBgn0030374	FBtr0300835	CG15734	C;C	C	C	1	0.00916715	CG15734	Dmel	FBgn0030374	CG15734		NA	NA	1	NA	NA	0	0	0	0	0	0
3L	11459205	11459211	7	FBgn0036161	FBtr0076176	CG7551	C;C	C	C	1	0.00989347	CG7551	Dmel	FBgn0036161	CG7551		NA	NA	1	NA	NA	0	0	0	0	0	0
3R	21771387	21771393	7	FBgn0027575	FBtr0084168	GABA-B-R2	C;C	C	C	0.534039	0.0480531	GABA-B-R2	Dmel	FBgn0027575	CG6706		NA	NA	1	NA	NA	0	1	0	0	0	0
3R	29099075	29099081	7	FBgn0039633	FBtr0330301	CG11873	C;C	C	C	1	0.0212137	Bicra	Dmel	FBgn0039633	CG11873		3	NA	1	1	NA	0	0	0	0	0	0
3R	9333261	9333267	7	FBgn0037679	FBtr0082056	Aduk	C;C	C	C	0.534039	0.0156531	Aduk	Dmel	FBgn0037679	CG8866		NA	NA	1	NA	NA	0	1	0	0	0	0
3R	10066948	10066954	7	FBgn0053783	FBtr0091784	CG33783	C;C	C	C	1	0.00744891	CG33783	Dmel	FBgn0053783	CG33783		NA	NA	1	NA	NA	0	0	0	0	0	0
3L	21838017	21838023	7	FBgn0037138	FBtr0303031	P5CDh1	C;C	C	C	0.534039	0.236177	P5CDh1	Dmel	FBgn0037138	CG7145		NA	NA	1	NA	NA	0	0	0	0	1	0
2R	18625550	18625556	7	FBgn0266671	FBtr0086709	Sec6	C;C	C	C	1	0.000951794	Sec6	Dmel	FBgn0266671	CG5341		NA	NA	1	NA	NA	0	0	0	0	1	0
X	18687613	18687619	7	FBgn0004959	FBtr0074603	phm	C;C	C	C	0.651555	0.0490129	phm	Dmel	FBgn0004959	CG6578		NA	NA	1	NA	NA	0	1	0	0	0	0
2R	16192307	16192313	7	FBgn0034087	FBtr0333169	clu	C;C	C	C	1	0.00300604	clu	Dmel	FBgn0034087	CG8443		NA	NA	1	NA	NA	1	0	0	0	1	0
3R	5085433	5085439	7	FBgn0010313	FBtr0308119	corto	C;C	C	C	1	0.032177	corto	Dmel	FBgn0010313	CG2530		3	NA	1	1	NA	0	0	0	0	0	0
3L	17822209	17822215	7	FBgn0261401	FBtr0302292	Ir75c	C;C	C	C	0.651555	0.000227628	Ir75c	Dmel	FBgn0261401	CG42642	CG14586	NA	NA	1	NA	NA	0	1	0	0	0	0
3L	16775882	16775888	7	FBgn0004108	FBtr0075323	Nrt	C;C	C	C	1	0.0298542	Nrt	Dmel	FBgn0004108	CG9704		NA	NA	1	NA	NA	0	1	0	0	0	0
3R	11677024	11677030	7	FBgn0037931	FBtr0082443	CG18476	C;C	C	C	0.651555	0.507256	CG18476	Dmel	FBgn0037931	CG18476	CG17822	NA	NA	1	NA	NA	0	0	1	0	0	0
X	15084204	15084210	7	FBgn0030610	FBtr0073966	CG9065	C;C	C	C	1	0.00630981	Cox17	Dmel	FBgn0030610	CG9065		NA	NA	1	NA	NA	0	0	0	0	1	0
3R	11949848	11949854	7	FBgn0051211	FBtr0082481	CG31211	C;C	C	C	0.534039	0.0169231	CG31211	Dmel	FBgn0051211	CG31211	CG14732,CG18546	NA	NA	1	NA	NA	0	0	0	0	0	0
3L	20295897	20295903	7	FBgn0036964	FBtr0074847	FRG1	C;C	C	C	0.651555	0.0183063	FRG1	Dmel	FBgn0036964	CG6480		NA	NA	1	NA	NA	0	0	0	0	0	0
2R	23346238	23346244	7	FBgn0046253	FBtr0273227	CG3502	C;C	C	C	1	0.0768722	CG3502	Dmel	FBgn0046253	CG3502		NA	NA	1	NA	NA	0	0	0	0	0	0
X	11670849	11670855	7	FBgn0004370	FBtr0273235	Ptp10D	C;C	C	C	1	0.0656238	Ptp10D	Dmel	FBgn0004370	CG1817		NA	NA	1	NA	NA	0	1	0	0	0	0
2R	23543448	23543454	7	FBgn0041234	FBtr0072059	Gr59f	C;C	C	C	1	0.0219241	Gr59f	Dmel	FBgn0041234	CG33150	CG5365	NA	NA	1	NA	NA	0	1	0	0	1	0
3R	24102023	24102029	7	FBgn0053100	FBtr0300475	eIF4EHP	C;C	C	C	0.534039	0.00315481	eIF4EHP	Dmel	FBgn0053100	CG33100	CG10716	NA	NA	1	NA	NA	1	0	0	0	1	0
3R	7902567	7902573	7	FBgn0037529	FBtr0081766	mRpS9	C;C	C	C	1	0.000959818	mRpS9	Dmel	FBgn0037529	CG2957		NA	NA	1	NA	NA	0	0	0	0	1	0
3R	18081634	18081640	7	FBgn0038566	FBtr0083541	CG14317	C;C	C	C	0.651555	0.098973	CG14317	Dmel	FBgn0038566	CG14317		NA	NA	1	NA	NA	0	0	0	0	0	0
3L	19999122	19999128	7	FBgn0036927	FBtr0302049	Gabat	C;C	C	C	0.651555	0.0347948	Gabat	Dmel	FBgn0036927	CG7433		NA	NA	1	NA	NA	0	0	0	0	0	0
X	16628765	16628771	7	FBgn0026181	FBtr0074286	Rok	C;C	C	C	0.534039	0.0100734	Rok	Dmel	FBgn0026181	CG9774		NA	5	1	NA	1	0	0	0	0	0	0
2L	1696249	1696255	7	FBgn0086758	FBtr0303934	chinmo	C;C	C	C	1	0.000942909	chinmo	Dmel	FBgn0086758	CG31666	CG10871,CG17156,CG17649	3	NA	1	1	NA	0	0	1	0	0	0
3L	9435283	9435289	7	FBgn0260431	FBtr0300855	CG42526	C;C	C	C	0.534039	0.00652713	CG42526	Dmel	FBgn0260431	CG42526		NA	NA	1	NA	NA	0	0	0	0	0	0
2R	5998332	5998338	7	FBgn0264959	FBtr0335276	Src42A	C;C	C	C	0.651555	0.0232127	Src42A	Dmel	FBgn0264959	CG44128	CG7873,CG14471	NA	NA	1	NA	NA	0	0	0	0	1	0
X	10610527	10610533	7	FBgn0263072	FBtr0332390	CG43347	C;C	C	C	0.534039	0.0195136	CG43347	Dmel	FBgn0263072	CG43347	CG9817,CG15295	NA	NA	1	NA	NA	0	1	1	0	0	0
3R	29685876	29685882	7	FBgn0039682	FBtr0333199	Obp99c	C;C	C	C	0.651555	0.15338	Obp99c	Dmel	FBgn0039682	CG7584		NA	NA	1	NA	NA	0	0	0	0	1	0
3R	12233320	12233326	7	FBgn0038005	FBtr0082619	Cyp313a5	C;C	C	C	0.651555	0.00308911	Cyp313a5	Dmel	FBgn0038005	CG15807		3	NA	1	1	NA	0	1	0	0	0	0
2L	21497971	21497977	7	FBgn0053884	FBtr0091888	His2B:CG33884	C;C	C	C	0.534039	0.0633356	His2B:CG33884	Dmel	FBgn0053884	CG33884		NA	NA	1	NA	NA	0	0	0	0	0	0
3L	5503632	5503638	7	FBgn0085371	FBtr0344834	CG34342	C;C	C	C	1	0.0744859	CG34342	Dmel	FBgn0085371	CG34342	CG32422,CG10629	3	NA	1	1	NA	0	1	0	0	0	0
3L	15096677	15096683	7	FBgn0027088	FBtr0333934	GlyRS	C;C	C	C	1	0.00617722	GlyRS	Dmel	FBgn0027088	CG6778		NA	NA	1	NA	NA	0	0	0	0	1	0
3R	15193344	15193350	7	FBgn0038296	FBtr0306246	CG6752	C;C	C	C	0.534039	0.0027579	Kpc1	Dmel	FBgn0038296	CG6752		NA	NA	1	NA	NA	0	0	0	0	0	0
2L	8518646	8518652	7	FBgn0032054	FBtr0079683	Uba4	C;C	C	C	1	0.147763	Uba4	Dmel	FBgn0032054	CG13090		NA	NA	1	NA	NA	0	0	0	0	0	0
X	21075428	21075434	7	FBgn0031150	FBtr0332846	bves	C;C	C	C	0.651555	0.062266	bves	Dmel	FBgn0031150	CG32513	CG1754,CG15448,CG1544	NA	NA	1	NA	NA	0	1	0	0	0	0
2R	14261996	14262002	7	FBgn0033919	FBtr0339968	CG8547	C;C	C	C	1	0.00942107	CG8547	Dmel	FBgn0033919	CG8547		NA	NA	1	NA	NA	0	0	0	0	1	0
3L	2141066	2141072	7	FBgn0052311	FBtr0332120	zormin	C;C	C	C	0.651555	0.00326556	zormin	Dmel	FBgn0052311	CG33484	CG32310,CG32307,CG5699,CG32311,CG32309,CG11952,CG11953,CG1282,CG11850	NA	NA	1	NA	NA	0	0	0	1	1	0
3R	11161904	11161910	7	FBgn0027584	FBtr0335216	CG4757	C;C	C	C	0.651555	0.0720616	CG4757	Dmel	FBgn0027584	CG4757		NA	NA	1	NA	NA	0	0	0	0	0	0
2L	13173707	13173713	7	FBgn0032475	FBtr0080492	Sfmbt	C;C	C	C	1	0.0197502	Sfmbt	Dmel	FBgn0032475	CG16975		3	NA	1	1	NA	0	0	0	0	0	0
3R	24715920	24715926	7	FBgn0039217	FBtr0084687	CG13627	C;C	C	C	0.651555	0.00925518	CG13627	Dmel	FBgn0039217	CG13627		NA	NA	1	NA	NA	0	0	0	0	0	0
X	8386827	8386833	7	FBgn0030033	FBtr0071173	CG1387	C;C	C	C	0.534039	0.00347686	CG1387	Dmel	FBgn0030033	CG1387		NA	NA	1	NA	NA	0	0	0	0	0	0
X	2121139	2121145	7	FBgn0004860	FBtr0070433	ph-d	C;C	C	C	0.534039	0.150618	ph-d	Dmel	FBgn0004860	CG3895		NA	5	1	NA	1	0	0	0	0	0	0
2L	1182680	1182686	7	FBgn0031320	FBtr0077978	CG5126	C;C	C	C	1	0.0323502	CG5126	Dmel	FBgn0031320	CG5126		NA	NA	1	NA	NA	0	0	0	0	0	0
X	19482316	19482322	7	FBgn0031020	FBtr0074711	Naa15-16	C;C	C	C	0.534039	0.241618	Naa15-16	Dmel	FBgn0031020	CG12202		NA	5	1	NA	1	0	0	0	0	1	0
3R	22763479	22763485	7	FBgn0039023	FBtr0084318	CG4723	C;C	C	C	1	0.0416387	Nepl14	Dmel	FBgn0039023	CG4723		NA	NA	1	NA	NA	0	0	0	0	0	0
3R	22687133	22687139	7	FBgn0039002	FBtr0084301	CG17625	C;C	C	C	0.651555	0.00638958	CG17625	Dmel	FBgn0039002	CG17625		NA	NA	1	NA	NA	0	0	0	0	0	0
3R	6267213	6267219	7	FBgn0037417	FBtr0078601	Osi10	C;C	C	C	0.534039	0.027922	Osi10a	Dmel	FBgn0286976	CG46436	CG15593	NA	NA	1	NA	NA	0	1	0	0	0	0
3R	29640666	29640672	7	FBgn0266137	FBtr0085468	Dop1R2	C;C	C	C	0.651555	0.0239453	Dop1R2	Dmel	FBgn0266137	CG18741	CG7569	NA	NA	1	NA	NA	0	1	0	0	0	0
3L	999272	999278	7	FBgn0024277	FBtr0072648	trio	C;C	C	C	0.651555	0.0087009	trio	Dmel	FBgn0024277	CG18214	CG9208	NA	NA	1	NA	NA	0	0	0	0	1	0
X	9225760	9225766	7	FBgn0030107	FBtr0071310	CG15370	C;C	C	C	0.534039	0.00116973	CG15370	Dmel	FBgn0030107	CG15370		NA	NA	1	NA	NA	0	0	0	0	1	0
3R	17153528	17153534	7	FBgn0038492	FBtr0334402	Mur89F	C;C	C	C	0.534039	0.0037809	Mur89F	Dmel	FBgn0038492	CG4090		NA	NA	1	NA	NA	0	0	0	0	0	0
3L	20346804	20346810	7	FBgn0036973	FBtr0078242	Rbbp5	C;C	C	C	0.534039	0.0184581	Rbbp5	Dmel	FBgn0036973	CG5585		NA	NA	1	NA	NA	0	0	0	0	0	0
Y	597997	598003	7	FBgn0001313	FBtr0346722	kl-2	C;C	C	C	0.651555	0.00187758	kl-2	Dmel	FBgn0001313	CG17866	CG40438	NA	NA	1	NA	NA	0	0	0	0	0	0
X	5998793	5998799	7	FBgn0027546	FBtr0070891	CG4766	C;C	C	C	0.534039	0.181187	CG4766	Dmel	FBgn0027546	CG4766		NA	NA	1	NA	NA	0	0	0	0	0	0
3R	5637776	5637782	7	FBgn0037356	FBtr0078709	CG12170	C;C	C	C	0.534039	0.00837472	CG12170	Dmel	FBgn0037356	CG12170		NA	NA	1	NA	NA	0	0	0	0	0	0
2L	18837527	18837533	7	FBgn0032717	FBtr0081120	CG10600	C;C	C	C	0.534039	0.304618	CG10600	Dmel	FBgn0032717	CG10600		NA	NA	1	NA	NA	0	0	0	0	0	0
3R	4791978	4791984	7	FBgn0260794	FBtr0301437	ctrip	C;C	C	C	0.651555	0.19856	ctrip	Dmel	FBgn0260794	CG42574	CG17735,CG14656	NA	NA	1	NA	NA	0	0	0	0	1	0
2R	6999255	6999261	7	FBgn0042086	FBtr0086177	Tsp42Eb	C;C	C	C	1	0.0673118	Tsp42Eb	Dmel	FBgn0042086	CG18816		NA	NA	1	NA	NA	0	1	0	0	0	0
X	7880075	7880081	7	FBgn0259189	FBtr0299673	Ir7e	C;C	C	C	0.534039	0.0144147	Ir7e	Dmel	FBgn0259189	CG42293	CG15327	NA	NA	1	NA	NA	0	1	0	0	0	0
3R	11748266	11748272	7	FBgn0037944	FBtr0307892	CG6923	C;C	C	C	0.534039	0.00412655	CG6923	Dmel	FBgn0037944	CG6923		NA	5	1	NA	1	0	0	0	0	1	0
2R	11148358	11148364	7	FBgn0033581	FBtr0088205	CG12391	C;C	C	C	0.534039	0.162686	CG12391	Dmel	FBgn0033581	CG12391		NA	NA	1	NA	NA	0	0	1	0	1	0
2R	19309830	19309836	7	FBgn0034433	FBtr0113098	EndoB	C;C	C	C	0.534039	0.0182852	EndoB	Dmel	FBgn0034433	CG9834		NA	NA	1	NA	NA	0	0	0	0	1	0
3L	6190007	6190013	7	FBgn0035691	FBtr0076999	CG7386	C;C	C	C	0.651555	0.0519162	CG7386	Dmel	FBgn0035691	CG7386		NA	NA	1	NA	NA	0	0	1	0	1	0
X	21105108	21105114	7	FBgn0031157	FBtr0344414	CG1503	C;C	C	C	0.651555	0.0231739	CG1503	Dmel	FBgn0031157	CG1503		NA	NA	1	NA	NA	0	0	0	0	0	0
X	11898782	11898788	7	FBgn0260780	FBtr0342742	wisp	C;C	C	C	0.534039	0.0275411	wisp	Dmel	FBgn0260780	CG15737		NA	NA	1	NA	NA	0	0	0	0	0	0
3R	27637948	27637954	7	FBgn0039532	FBtr0085193	Mtl	C;C	C	C	1	0.164943	Mtl	Dmel	FBgn0039532	CG5588		3	NA	1	1	NA	0	0	0	0	0	0
2L	1180690	1180696	7	FBgn0031319	FBtr0077968	CG4896	C;C	C	C	0.534039	0.0134329	CG4896	Dmel	FBgn0031319	CG4896		3	NA	1	1	NA	1	0	0	0	0	0
3L	11207038	11207044	7	FBgn0061469	FBtr0076186	Ube3a	C;C	C	C	1	0.0155597	Ube3a	Dmel	FBgn0061469	CG6190		NA	NA	1	NA	NA	0	0	0	0	0	0
2L	16003174	16003180	7	FBgn0085196	FBtr0112358	CG34167	C;C	C	C	0.651555	0.00401128	CG34167	Dmel	FBgn0085196	CG34167		NA	NA	1	NA	NA	0	0	0	0	0	0
X	20462625	20462631	7	FBgn0052506	FBtr0340401	CG32506	C;C	C	C	0.534039	0.00455033	tbc	Dmel	FBgn0052506	CG32506		NA	NA	1	NA	NA	0	0	0	0	0	0
3L	20801009	20801015	7	FBgn0037025	FBtr0321284	Spc105R	C;C	C	C	0.651555	0.0718992	Spc105R	Dmel	FBgn0037025	CG11451		NA	NA	1	NA	NA	0	0	0	0	1	0
2L	11096562	11096568	7	FBgn0283682	FBtr0080231	Ge-1	C;C	C	C	0.651555	0.0125876	Ge-1	Dmel	FBgn0283682	CG6181		NA	NA	1	NA	NA	0	0	0	0	1	0
3R	28863021	28863027	7	FBgn0264324	FBtr0330304	spg	C;C	C	C	1	0.0317171	spg	Dmel	FBgn0264324	CG31048	CG14530,CG11754	NA	NA	1	NA	NA	0	0	0	0	0	0
3R	10707720	10707726	7	FBgn0051278	FBtr0082319	CG31278	C;C	C	C	0.651555	0.0132524	CG31278	Dmel	FBgn0051278	CG31278	CG6482	3	NA	1	1	NA	0	0	0	0	0	1
2L	17655831	17655837	7	FBgn0015609	FBtr0081015	CadN	C;C	C	C	0.651555	0.0208585	CadN	Dmel	FBgn0015609	CG7100		3	5	1	1	1	0	1	0	0	0	0
3R	15071488	15071494	7	FBgn0038282	FBtr0346114	dpr9	C;C	C	C	0.534039	0.0284855	dpr9	Dmel	FBgn0038282	CG33485	CG31114,CG12601,CG14863,CG14862	NA	NA	1	NA	NA	0	1	0	0	0	0
2L	21146087	21146093	7	FBgn0086251	FBtr0333085	del	C;C	C	C	1	0.00610107	del	Dmel	FBgn0086251	CG9252		NA	NA	1	NA	NA	0	0	0	0	0	0
3R	8088203	8088209	7	FBgn0037547	FBtr0081790	CG7910	C;C	C	C	0.651555	0.00421748	CG7910	Dmel	FBgn0037547	CG7910		NA	NA	1	NA	NA	0	0	0	0	0	0
2L	4.9489e+06	4.9489e+06	7	FBgn0031652	FBtr0110896	jet	C;C	C	C	1	0.00753288	jet	Dmel	FBgn0031652	CG8873		NA	NA	1	NA	NA	0	0	0	0	0	0
2L	6658976	6658982	7	FBgn0028467	FBtr0079297	CG11070	C;C	C	C	1	0.0285039	Ube4A	Dmel	FBgn0028467	CG11070		NA	NA	1	NA	NA	0	0	0	0	0	0
3R	9636777	9636783	7	FBgn0003334	FBtr0082102	Scm	C;C	C	C	0.651555	0.00515209	Scm	Dmel	FBgn0003334	CG9495		NA	NA	1	NA	NA	0	0	1	0	1	0
3L	13842773	13842779	7	FBgn0040812	FBtr0345696	CG8750	C;C	C	C	0.534039	0.0155292	CG8750	Dmel	FBgn0040812	CG8750		NA	NA	1	NA	NA	0	0	0	0	0	0
2L	10855377	10855383	7	FBgn0027453	FBtr0080181	Dnz1	C;C	C	C	1	0.0631928	Dnz1	Dmel	FBgn0027453	CG6627		NA	NA	1	NA	NA	0	1	1	0	1	0
X	18654677	18654683	7	FBgn0030946	FBtr0074613	CG6659	C;C	C	C	0.534039	0.00422293	CG6659	Dmel	FBgn0030946	CG6659		NA	NA	1	NA	NA	0	1	0	0	1	0
2R	10119578	10119584	7	FBgn0033486	FBtr0088423	dmpd	C;C	C	C	0.534039	0.0325272	dmpd	Dmel	FBgn0033486	CG11866		3	NA	1	1	NA	0	0	0	0	0	0
2L	6952784	6952790	7	FBgn0020616	FBtr0079349	SA	C;C	C	C	0.534039	0.0463888	SA	Dmel	FBgn0020616	CG3423		NA	NA	1	NA	NA	0	0	0	0	0	0
2R	1443597	1443603	7	FBgn0262123	FBtr0114030	l(2)41Ab	C;C	C	C	0.534039	0.0666975	l(2)41Ab	Dmel	FBgn0262123	CG41265	CG40334,CG40214	NA	NA	1	NA	NA	0	0	0	0	0	0
2L	18941237	18941243	7	FBgn0032723	FBtr0342929	ssp3	C;C	C	C	0.534039	0.0542733	ssp3	Dmel	FBgn0032723	CG18397	CG10666	NA	NA	1	NA	NA	0	0	0	0	0	0
3R	11738044	11738050	7	FBgn0002906	FBtr0082434	Blm	C;C	C	C	0.534039	0.006756	Blm	Dmel	FBgn0002906	CG6920		NA	NA	1	NA	NA	0	0	0	0	0	0
X	17216973	17216979	7	FBgn0030828	FBtr0340616	CG5162	C;C	C	C	1	0.0182531	CG5162	Dmel	FBgn0030828	CG5162		NA	NA	1	NA	NA	0	0	0	0	0	0
3R	9790050	9790056	7	FBgn0037755	FBtr0113214	CG12945	C;C	C	C	1	0.0254767	CG12945	Dmel	FBgn0037755	CG12945		NA	NA	1	NA	NA	0	1	0	0	0	0
2L	13595974	13595980	7	FBgn0028513	FBtr0080512	CG9254	C;C	C	C	0.651555	0.0123714	CG9254	Dmel	FBgn0028513	CG9254		NA	NA	1	NA	NA	0	1	0	0	0	0
X	6059991	6059997	7	FBgn0029835	FBtr0336972	CG5921	C;C	C	C	0.534039	0.00315083	CG5921	Dmel	FBgn0029835	CG5921		NA	NA	1	NA	NA	0	0	0	0	0	0
3L	13020459	13020465	7	FBgn0036337	FBtr0075895	AdenoK	C;C	C	C	0.651555	0.0247638	Adk2	Dmel	FBgn0036337	CG11255		NA	NA	1	NA	NA	0	0	0	0	0	0
2R	6814184	6814190	7	FBgn0265003	FBtr0335515	koi	C;C	C	C	0.534039	0.00120766	koi	Dmel	FBgn0265003	CG44154	CG18584,CG3287	NA	5	1	NA	1	0	1	0	0	0	0
2R	21561565	21561571	7	FBgn0034636	FBtr0071692	twz	C;C	C	C	0.534039	0.0338889	twz	Dmel	FBgn0034636	CG10440		NA	NA	1	NA	NA	0	0	0	0	0	0
2R	11369934	11369940	7	FBgn0033627	FBtr0088129	CG13204	C;C	C	C	1	0.012408	CG13204	Dmel	FBgn0033627	CG13204		NA	NA	1	NA	NA	0	0	1	0	0	0
X	15926911	15926917	7	FBgn0010240	FBtr0074129	Lcch3	C;C	C	C	0.651555	0.0413696	Lcch3	Dmel	FBgn0010240	CG17336		NA	NA	1	NA	NA	0	1	0	0	1	0
3R	4428058	4428064	7	FBgn0051525	FBtr0078924	CG31525	C;C	C	C	0.534039	0.0156025	CG31525	Dmel	FBgn0051525	CG31525		NA	NA	1	NA	NA	0	0	0	0	0	0
X	12476207	12476213	7	FBgn0259143	FBtr0299558	CG42258	C;C	C	C	0.534039	0.0520061	CG42258	Dmel	FBgn0259143	CG42258	CG17788,CG15926	3	NA	1	1	NA	0	0	0	0	0	0
2R	17688404	17688410	7	FBgn0034261	FBtr0086839	HPS4	C;C	C	C	0.534039	0.0384852	HPS4	Dmel	FBgn0034261	CG4966		NA	NA	1	NA	NA	0	0	0	0	0	0
3L	15974723	15974729	7	FBgn0000212	FBtr0075523	brm	C;C	C	C	0.534039	0.14783	brm	Dmel	FBgn0000212	CG5942	CG18438	NA	NA	1	NA	NA	0	0	0	0	0	0
2L	14728805	14728811	7	FBgn0261571	FBtr0302857	CG42685	C;C	C	C	1	0.000333803	CG42685	Dmel	FBgn0261571	CG42685	CG33482,CG12636	NA	NA	1	NA	NA	0	1	0	0	0	0
2R	16323895	16323901	7	FBgn0034114	FBtr0087144	CG4282	C;C	C	C	0.651555	0.147176	CG4282	Dmel	FBgn0034114	CG4282		NA	NA	1	NA	NA	0	0	1	0	0	0
2L	8465443	8465449	7	FBgn0285971	FBtr0079674	prg	C;C	C	C	0.651555	0.118503	prg	Dmel	FBgn0285971	CG9233		NA	NA	1	NA	NA	0	0	1	0	1	0
X	1920637	1920643	7	FBgn0023512	FBtr0070350	eIF2Bepsilon	C;C	C	C	0.534039	0.0691112	eIF2Bepsilon	Dmel	FBgn0023512	CG3806		NA	NA	1	NA	NA	1	0	0	0	1	0
3L	3181130	3181136	7	FBgn0283724	FBtr0073035	Girdin	C;C	C	C	0.534039	0.0551513	Girdin	Dmel	FBgn0283724	CG12734		NA	NA	1	NA	NA	0	0	0	0	0	0
3R	18162734	18162740	7	FBgn0038569	FBtr0344646	CG7218	C;C	C	C	0.534039	0.0235709	CG7218	Dmel	FBgn0038569	CG7218		NA	NA	1	NA	NA	0	1	0	0	0	0
3R	1.30725e+07	1.30726e+07	7	FBgn0004666	FBtr0082710	sim	C;C	C	C	0.651555	0.0401147	sim	Dmel	FBgn0004666	CG7771		NA	NA	1	NA	NA	0	0	1	0	0	0
X	8875506	8875512	7	FBgn0011661	FBtr0071272	Moe	C;C	C	C	0.534039	0.00376302	Moe	Dmel	FBgn0011661	CG10701		NA	5	1	NA	1	0	0	0	0	0	0
2L	158315	158321	7	FBgn0053635	FBtr0091612	CG33635	C;C	C	C	0.651555	0.0112877	CG33635	Dmel	FBgn0053635	CG33635		NA	NA	1	NA	NA	0	1	0	0	0	0
2R	9098658	9098664	7	FBgn0033376	FBtr0088565	CG8777	C;C	C	C	0.534039	0.00818112	CG8777	Dmel	FBgn0033376	CG8777		NA	NA	1	NA	NA	0	0	0	0	0	0
2R	22688402	22688408	7	FBgn0020257	FBtr0343014	Ppa	C;C	C	C	0.534039	0.00164156	Ppa	Dmel	FBgn0020257	CG9952		NA	NA	1	NA	NA	0	0	0	0	0	0
X	6655756	6655762	7	FBgn0028360	FBtr0070950	Cdc7	C;C	C	C	0.651555	0.0438218	Cdc7	Dmel	FBgn0028360	CG32742	CG8655,CG8656	NA	NA	1	NA	NA	0	1	0	0	0	0
3R	14306840	14306846	7	FBgn0003567	FBtr0310002	su(Hw)	C;C	C	C	1	0.0585956	su(Hw)	Dmel	FBgn0003567	CG8573		3	NA	1	1	NA	0	0	1	0	0	0
X	17859993	17859999	7	FBgn0030877	FBtr0074544	Arp8	C;C	C	C	0.534039	0.0345381	Arp8	Dmel	FBgn0030877	CG7846		NA	NA	1	NA	NA	0	0	0	0	0	0
X	6343110	6343116	7	FBgn0029866	FBtr0331394	CG3842	C;C	C	C	1	0.0106504	CG3842	Dmel	FBgn0029866	CG3842		NA	NA	1	NA	NA	0	0	0	0	1	0
3R	17721062	17721068	7	FBgn0261987	FBtr0083508	Pxt	C;C	C	C	1	0.0482483	Pxt	Dmel	FBgn0261987	CG7660		NA	NA	1	NA	NA	0	0	0	0	1	0
2L	8826531	8826537	7	FBgn0029123	FBtr0079733	SoxN	C;C	C	C	1	0.0138226	SoxN	Dmel	FBgn0029123	CG18024		3	NA	1	1	NA	0	0	1	0	0	0
3R	12410738	12410744	7	FBgn0038039	FBtr0082585	CG5196	C;C	C	C	0.534039	0.0302933	CG5196	Dmel	FBgn0038039	CG5196		NA	NA	1	NA	NA	0	1	1	0	0	0
2L	4825647	4825653	7	FBgn0031632	FBtr0077384	CG15628	C;C	C	C	0.651555	0.061055	CG15628	Dmel	FBgn0031632	CG15628		NA	NA	1	NA	NA	0	0	0	0	0	0
2L	13120080	13120086	7	FBgn0262352	FBtr0304630	CG43050	C;C	C	C	0.651555	0.0256141	CG43050	Dmel	FBgn0262352	CG43050		NA	NA	1	NA	NA	0	0	0	0	0	0
2L	14277778	14277784	7	FBgn0052971	FBtr0114462	CG32971	C;C	C	C	1	0.0189373	CG32971	Dmel	FBgn0052971	CG32971		NA	NA	1	NA	NA	0	0	0	0	0	0
3R	15777119	15777125	7	FBgn0038358	FBtr0083170	CG4525	C;C	C	C	0.651555	0.057293	Ttc26	Dmel	FBgn0038358	CG4525		NA	NA	1	NA	NA	0	0	0	0	0	0
X	4685845	4685851	7	FBgn0022768	FBtr0070685	Pp2C1	C;C	C	C	1	0.00162395	Pp2C1	Dmel	FBgn0022768	CG2984		NA	NA	1	NA	NA	0	0	0	0	0	0
2R	11990701	11990707	7	FBgn0033673	FBtr0306003	CG8298	C;C	C	C	0.534039	0.0484195	CG8298	Dmel	FBgn0033673	CG8298		3	NA	1	1	NA	0	0	0	0	0	0
2R	23169525	23169531	7	FBgn0085400	FBtr0112596	CG34371	C;C	C	C	0.651555	0.037033	side-V	Dmel	FBgn0085400	CG34371	CG30188,CG13548,CG13547,CG13546	NA	NA	1	NA	NA	0	1	0	0	0	0
2L	20782033	20782039	7	FBgn0000251	FBtr0335152	cad	C;C	C	C	0.534039	0.00535298	cad	Dmel	FBgn0000251	CG1759		NA	NA	1	NA	NA	0	0	1	0	0	0
3R	2.45289e+07	2.45289e+07	7	FBgn0039204	FBtr0084644	CG6607	C;C	C	C	0.534039	0.00639184	CG6607	Dmel	FBgn0039204	CG6607		NA	NA	1	NA	NA	0	0	0	0	0	0
3L	25109754	25109760	7	FBgn0040022	FBtr0113871	Set1	C;C	C	C	0.534039	0.0963622	Set1	Dmel	FBgn0040022	CG40351	CG17396,CG17395	NA	NA	1	NA	NA	1	0	0	0	0	0
3R	26912509	26912515	7	FBgn0004510	FBtr0330167	Ets97D	C;C	C	C	0.534039	0.110461	Ets97D	Dmel	FBgn0004510	CG6338		NA	NA	1	NA	NA	0	0	1	0	1	0
X	21619271	21619277	7	FBgn0052819	FBtr0070051	CG32819	C;C	C	C	0.651555	0.0346122	CG32819	Dmel	FBgn0052819	CG32819		NA	NA	1	NA	NA	0	0	0	0	0	0
3L	8999492	8999498	7	FBgn0035953	FBtr0076520	CG5087	C;C	C	C	0.534039	0.00202774	CG5087	Dmel	FBgn0035953	CG5087		NA	NA	1	NA	NA	0	0	0	0	1	0
2L	16803102	16803108	7	FBgn0032609	FBtr0080931	CG13280	C;C	C	C	0.651555	0.0347323	CG13280	Dmel	FBgn0032609	CG13280		NA	NA	1	NA	NA	0	0	0	0	0	0
2R	22218928	22218934	7	FBgn0050277	FBtr0071779	Oatp58Da	C;C	C	C	1	0.0812084	Oatp58Da	Dmel	FBgn0050277	CG30277	CG3387	NA	NA	1	NA	NA	0	1	0	0	1	0
X	795762	795768	7	FBgn0025621	FBtr0070140	CG16989	C;C	C	C	1	0.00989274	CG16989	Dmel	FBgn0025621	CG16989		NA	NA	1	NA	NA	0	0	0	0	0	0
X	8020780	8020786	7	FBgn0029989	FBtr0071124	CG15333	C;C	C	C	1	0.0102367	CG15333	Dmel	FBgn0029989	CG15333	CG18293	NA	NA	1	NA	NA	0	0	0	0	0	0
3R	27917894	27917900	7	FBgn0039555	FBtr0085247	mRpS22	C;C	C	C	1	0.0297608	mRpS22	Dmel	FBgn0039555	CG12261		NA	NA	1	NA	NA	0	0	0	0	1	1
2L	19188408	19188414	7	FBgn0010309	FBtr0081194	pigeon	C;C	C	C	1	0.00442103	pigeon	Dmel	FBgn0010309	CG10739		NA	NA	1	NA	NA	0	1	0	0	0	0
2L	5912704	5912710	7	FBgn0043362	FBtr0079144	bchs	C;C	C	C	1	0.0449851	bchs	Dmel	FBgn0043362	CG14001	CG9011	NA	NA	1	NA	NA	0	0	0	0	0	0
3L	12088768	12088774	7	FBgn0036246	FBtr0075990	CG17154	C;C	C	C	0.534039	0.00533493	CG17154	Dmel	FBgn0036246	CG17154		NA	NA	1	NA	NA	0	0	0	0	1	0
3R	14312337	14312343	7	FBgn0051321	FBtr0082926	CG31321	C;C	C	C	0.651555	0.0412582	CG31321	Dmel	FBgn0051321	CG31321		NA	NA	1	NA	NA	0	1	0	0	0	0
3L	10585233	10585239	7	FBgn0052062	FBtr0113418	Rbfox1	C;C	C	C	1	0.00218246	Rbfox1	Dmel	FBgn0052062	CG32062	CG14155,CG18441	NA	NA	1	NA	NA	1	0	0	0	0	0
3R	10816330	10816336	7	FBgn0037838	FBtr0082281	CG4089	C;C	C	C	0.534039	0.0224268	TTLL15	Dmel	FBgn0037838	CG4089		NA	NA	1	NA	NA	0	0	0	0	0	0
2L	11268555	11268561	7	FBgn0040232	FBtr0332204	cmet	C;C	C	C	1	0.0387859	cmet	Dmel	FBgn0040232	CG6392		NA	NA	1	NA	NA	0	0	0	0	0	0
3L	16346962	16346968	7	FBgn0053257	FBtr0075378	CG33257	C;C	C	C	0.534039	0.144947	CG33257	Dmel	FBgn0053257	CG33257	CG13037	NA	NA	1	NA	NA	0	0	0	0	1	0
4	309614	309620	7	FBgn0026777	FBtr0089122	Rad23	C;C	C	C	1	0.00144362	Rad23	Dmel	FBgn0026777	CG1836		NA	NA	1	NA	NA	0	0	0	0	0	0
3R	9721708	9721714	7	FBgn0002431	FBtr0339599	hyd	C;C	C	C	0.651555	0.0627349	hyd	Dmel	FBgn0002431	CG9484		NA	NA	1	NA	NA	1	0	0	0	1	0
3R	1.87607e+07	1.87607e+07	7	FBgn0038652	FBtr0301201	CG7720	C;C	C	C	0.651555	0.0723777	CG7720	Dmel	FBgn0038652	CG7720		3	NA	1	1	NA	0	1	0	0	0	0
2L	18591879	18591885	7	FBgn0032688	FBtr0343826	CG15160	C;C	C	C	0.534039	0.0892103	CG15160	Dmel	FBgn0032688	CG15160		NA	NA	1	NA	NA	0	0	0	0	0	0
3L	3816238	3816244	7	FBgn0015585	FBtr0073182	Acp63F	C;C	C	C	1	0.0148941	Acp63F	Dmel	FBgn0015585	CG10852		NA	NA	1	NA	NA	0	0	0	0	0	0
2R	18454305	18454311	7	FBgn0034352	FBtr0086722	CG17669	C;C	C	C	0.534039	0.0202845	CG17669	Dmel	FBgn0034352	CG17669		NA	NA	1	NA	NA	0	0	0	0	0	0
3R	19887538	19887544	7	FBgn0002940	FBtr0083857	ninaE	C;C	C	C	0.651555	0.0644421	ninaE	Dmel	FBgn0002940	CG4550		NA	NA	1	NA	NA	0	1	0	0	0	0
3R	22442595	22442601	7	FBgn0038968	FBtr0084295	CG12499	C;C	C	C	1	0.041708	CG12499	Dmel	FBgn0038968	CG12499		NA	NA	1	NA	NA	0	1	0	0	1	0
2L	7895730	7895736	7	FBgn0085450	FBtr0112718	Snoo	C;C	C	C	0.534039	0.0539668	Snoo	Dmel	FBgn0085450	CG34421	CG7233,CG7093	3	NA	1	1	NA	0	1	1	0	0	0
3L	19833872	19833878	7	FBgn0003744	FBtr0074922	trc	C;C	C	C	0.534039	0.116567	trc	Dmel	FBgn0003744	CG8637		NA	NA	1	NA	NA	0	0	0	0	0	0
X	19688346	19688352	7	FBgn0031058	FBtr0300350	CG14227	C;C	C	C	0.534039	0.00416043	CG14227	Dmel	FBgn0031058	CG14227		NA	NA	1	NA	NA	0	1	0	0	0	0
2L	21428301	21428307	7	FBgn0053908	FBtr0091912	His2B:CG33908	C;C	C	C	0.534039	0.0633356	His2B:CG33908	Dmel	FBgn0053908	CG33908		NA	NA	1	NA	NA	0	0	0	0	0	0
3L	8631947	8631953	7	FBgn0035918	FBtr0076647	Cdc6	C;C	C	C	1	0.00408821	Cdc6	Dmel	FBgn0035918	CG5971		NA	NA	1	NA	NA	0	0	0	0	0	0
3R	9412892	9412898	7	FBgn0011740	FBtr0082031	alpha-Man-IIa	C;C	C	C	0.651555	0.00423575	alpha-Man-IIa	Dmel	FBgn0011740	CG18802	CG8139,CG18474	NA	NA	1	NA	NA	0	0	0	0	0	0
3L	12271131	12271137	7	FBgn0036271	FBtr0333357	Pbgs	C;C	C	C	0.534039	0.107246	Pbgs	Dmel	FBgn0036271	CG10335		NA	NA	1	NA	NA	0	0	0	0	1	0
3R	27552806	27552812	7	FBgn0004387	FBtr0304671	Klp98A	C;C	C	C	0.534039	0.00913806	Klp98A	Dmel	FBgn0004387	CG5658		NA	NA	1	NA	NA	0	0	0	0	0	0
X	13368548	13368554	7	FBgn0030477	FBtr0073768	dmrt11E	C;C	C	C	1	0.0238891	dmrt11E	Dmel	FBgn0030477	CG15749		NA	NA	1	NA	NA	0	0	1	0	0	0
X	19564021	19564027	7	FBgn0026430	FBtr0343590	Grip84	C;C	C	C	0.651555	0.00748754	Grip84	Dmel	FBgn0026430	CG3917		3	NA	1	1	NA	0	0	0	0	0	0
2R	15369969	15369975	7	FBgn0011660	FBtr0087388	Pms2	C;C	C	C	0.534039	0.0217267	Pms2	Dmel	FBgn0011660	CG8169		NA	NA	1	NA	NA	0	0	0	0	0	0
3R	27952791	27952797	7	FBgn0039563	FBtr0085265	CG4951	C;C	C	C	0.534039	0.0180501	CG4951	Dmel	FBgn0039563	CG4951		NA	NA	1	NA	NA	0	0	0	0	0	0
3L	7396521	7396527	7	FBgn0052379	FBtr0273419	CG32379	C;C	C	C	1	0.135478	CG32379	Dmel	FBgn0052379	CG32379	CG18415	NA	NA	1	NA	NA	0	0	0	0	0	0
3R	18598057	18598063	7	FBgn0038629	FBtr0305957	CG14304	C;C	C	C	0.534039	0.00353359	CG14304	Dmel	FBgn0038629	CG14304		NA	NA	1	NA	NA	0	0	0	0	0	0
3R	13243396	13243402	7	FBgn0000024	FBtr0082780	Ace	C;C	C	C	1	0.00418675	Ace	Dmel	FBgn0000024	CG17907		3	NA	1	1	NA	0	1	0	0	0	0
3R	29110845	29110851	7	FBgn0039634	FBtr0085416	alpha-Man-Ib	C;C	C	C	0.651555	0.0363981	alpha-Man-Ib	Dmel	FBgn0039634	CG11874		NA	NA	1	NA	NA	0	1	0	0	1	0
X	3315011	3315017	7	FBgn0029656	FBtr0070536	CG10793	C;C	C	C	0.534039	0.00729347	CG10793	Dmel	FBgn0029656	CG10793		NA	NA	1	NA	NA	0	0	0	0	0	0
3R	8260122	8260128	7	FBgn0260386	FBtr0310081	mtg	C;C	C	C	0.534039	0.0641925	mtg	Dmel	FBgn0260386	CG7549		NA	NA	1	NA	NA	0	0	0	0	1	0
2R	6200935	6200941	7	FBgn0033069	FBtr0085990	eIF3f2	C;C	C	C	0.534039	0.000865603	eIF3f2	Dmel	FBgn0033069	CG8335		NA	NA	1	NA	NA	1	0	0	0	0	0
3R	11964226	11964232	7	FBgn0000147	FBtr0082483	aurA	C;C	C	C	0.651555	0.00343867	aurA	Dmel	FBgn0000147	CG3068		NA	NA	1	NA	NA	0	0	0	0	0	0
3L	8470465	8470471	7	FBgn0010825	FBtr0305697	Gug	C;C	C	C	0.651555	0.0335994	Gug	Dmel	FBgn0010825	CG6964		NA	NA	1	NA	NA	0	0	1	0	1	0
2R	22600094	22600100	7	FBgn0034741	FBtr0343001	CG4269	C;C	C	C	1	0.015854	CG4269	Dmel	FBgn0034741	CG4269		NA	NA	1	NA	NA	0	0	0	0	0	0
2L	5124202	5124208	7	FBgn0261836	FBtr0332404	Msp300	C;C	C	C	1	0.00504819	Msp300	Dmel	FBgn0261836	CG42768	CG14035,CG31649,CG33549,CG33715,CG18252,CG18251,CG31916	NA	NA	1	NA	NA	0	1	0	1	1	0
3R	9776088	9776094	7	FBgn0037751	FBtr0082135	topi	C;C	C	C	0.534039	0.0491518	topi	Dmel	FBgn0037751	CG8484		NA	NA	1	NA	NA	0	0	1	0	0	0
2R	9825539	9825545	7	FBgn0033447	FBtr0309879	dila	C;C	C	C	0.534039	0.0398764	dila	Dmel	FBgn0033447	CG1625	CG1626	NA	NA	1	NA	NA	0	0	0	0	0	0
X	4547402	4547408	7	FBgn0029711	FBtr0308917	Usf	C;C	C	C	0.534039	0.00394273	Usf	Dmel	FBgn0029711	CG17592		NA	NA	1	NA	NA	0	0	1	0	0	0
2R	11844755	11844761	7	FBgn0262819	FBtr0306061	CG43190	C;C	C	C	1	0.00690307	CG43190	Dmel	FBgn0262819	CG43190		NA	NA	1	NA	NA	0	1	0	0	0	0
3R	25043943	25043949	7	FBgn0259178	FBtr0299662	5PtaseI	C;C	C	C	1	0.00542244	5PtaseI	Dmel	FBgn0259178	CG42283	CG31110,CG31107,CG7613	3	NA	1	1	NA	0	0	0	0	0	0
X	16959111	16959117	7	FBgn0030809	FBtr0346190	Ubr1	C;C	C	C	1	0.0115483	Ubr1	Dmel	FBgn0030809	CG9086		NA	NA	1	NA	NA	0	0	0	0	0	0
2R	7461027	7461033	7	FBgn0033177	FBtr0088999	CG11141	C;C	C	C	1	0.00244466	CG11141	Dmel	FBgn0033177	CG11141		NA	NA	1	NA	NA	0	0	0	0	0	0
X	16594518	16594524	7	FBgn0267384	FBtr0074283	Ubc7	C;C	C	C	0.534039	0.00567909	Ubc7	Dmel	FBgn0267384	CG4443		NA	NA	1	NA	NA	0	0	0	0	0	0
3L	7033923	7033929	7	FBgn0260660	FBtr0306638	Mp	C;C	C	C	1	0.0406128	Mp	Dmel	FBgn0260660	CG42543	CG33171,CG8647,CG14822,CG8645	NA	NA	1	NA	NA	0	0	0	0	0	0
2R	19393106	19393112	7	FBgn0261439	FBtr0086553	SdhA	C;C	C	C	1	0.0081638	SdhA	Dmel	FBgn0261439	CG17246		NA	NA	1	NA	NA	0	0	0	0	0	1
2R	18700343	18700349	7	FBgn0262103	FBtr0340388	Sik3	C;C	C	C	0.651555	0.00732483	Sik3	Dmel	FBgn0262103	CG42856	CG18604,CG15072	3	NA	1	1	NA	0	0	0	0	0	0
3L	16084162	16084168	7	FBgn0036563	FBtr0301031	CG13075	C;C	C	C	0.651555	0.0750898	CG13075	Dmel	FBgn0036563	CG13075		NA	NA	1	NA	NA	0	0	0	0	0	0
3L	20224610	20224616	7	FBgn0260393	FBtr0310467	CG17147	C;C	C	C	0.651555	0.124698	CG17147	Dmel	FBgn0260393	CG17147		NA	NA	1	NA	NA	0	0	0	0	0	0
2L	21418338	21418344	7	FBgn0053910	FBtr0091914	His2B:CG33910	C;C	C	C	0.534039	0.0633356	His2B:CG33910	Dmel	FBgn0053910	CG33910		NA	NA	1	NA	NA	0	0	0	0	0	0
3R	22355754	22355760	7	FBgn0038946	FBtr0084205	rdhB	C;C	C	C	0.534039	0.263348	rdhB	Dmel	FBgn0038946	CG7077		NA	NA	1	NA	NA	0	1	0	0	0	0
3R	14107120	14107126	7	FBgn0038202	FBtr0330081	CG12402	C;C	C	C	0.534039	0.0394018	CG12402	Dmel	FBgn0038202	CG12402		NA	NA	1	NA	NA	0	0	0	0	1	0
3R	8387341	8387347	7	FBgn0266801	FBtr0345460	CG45263	C;C	C	C	0.534039	0.0845959	CG45263	Dmel	FBgn0266801	CG45263	CG42286,CG42285,CG11718,CG31264,CG31369,CG43462,CG31462,CG11733,CG11731,CG11730,CG11729	3	NA	1	1	NA	0	1	0	0	0	0
3L	14774124	14774130	7	FBgn0036448	FBtr0075700	mop	C;C	C	C	0.534039	0.00323942	mop	Dmel	FBgn0036448	CG9311		NA	NA	1	NA	NA	0	0	0	0	1	0
2R	7249442	7249448	7	FBgn0033153	FBtr0089049	Gadd45	C;C	C	C	0.534039	0.00523925	Gadd45	Dmel	FBgn0033153	CG11086		NA	NA	1	NA	NA	0	0	0	0	1	0
3R	30436511	30436517	7	FBgn0039770	FBtr0339141	CG15537	C;C	C	C	1	0.0866318	CG15537	Dmel	FBgn0039770	CG15537		NA	NA	1	NA	NA	0	0	0	0	0	0
3L	9427472	9427478	7	FBgn0015296	FBtr0076458	Shc	C;C	C	C	0.534039	0.151069	Shc	Dmel	FBgn0015296	CG3715		NA	NA	1	NA	NA	0	0	0	0	0	0
X	646038	646044	7	FBgn0025634	FBtr0070121	CG13367	C;C	C	C	1	0.00735019	CG13367	Dmel	FBgn0025634	CG13367		NA	NA	1	NA	NA	0	0	0	0	0	0
2R	12490405	12490411	7	FBgn0045063	FBtr0346633	fdl	C;C	C	C	1	0.0107612	fdl	Dmel	FBgn0045063	CG8824		NA	NA	1	NA	NA	0	0	0	0	0	0
2L	4403547	4403553	7	FBgn0031601	FBtr0077435	Dim1	C;C	C	C	0.651555	0.306079	Dim1	Dmel	FBgn0031601	CG3058		NA	NA	1	NA	NA	0	0	0	0	1	0
2L	19529579	19529585	7	FBgn0032800	FBtr0081248	CG10137	C;C	C	C	0.651555	0.469108	CG10137	Dmel	FBgn0032800	CG10137		NA	NA	1	NA	NA	0	0	0	0	0	0
2L	10289385	10289391	7	FBgn0032208	FBtr0080074	Ufd4	C;C	C	C	1	0.000178038	Ufd4	Dmel	FBgn0032208	CG5604		NA	NA	1	NA	NA	0	0	0	0	0	0
3L	2197759	2197765	7	FBgn0035315	FBtr0072871	CG8960	C;C	C	C	0.534039	0.00944463	CG8960	Dmel	FBgn0035315	CG8960		NA	NA	1	NA	NA	0	0	0	0	1	0
2R	10803973	10803979	7	FBgn0027499	FBtr0088253	wde	C;C	C	C	0.534039	0.291948	wde	Dmel	FBgn0027499	CG12340		NA	NA	1	NA	NA	0	0	0	0	0	0
X	1868317	1868323	7	FBgn0023516	FBtr0070367	Pex5	C;C	C	C	0.534039	0.0168786	Pex5	Dmel	FBgn0023516	CG14815		NA	NA	1	NA	NA	0	0	0	0	0	0
2R	20896489	20896495	7	FBgn0015524	FBtr0342799	otp	C;C	C	C	0.534039	0.0869686	otp	Dmel	FBgn0015524	CG10036	CG2965	NA	5	1	NA	1	0	0	1	0	0	0
X	6247423	6247429	7	FBgn0023458	FBtr0303341	Rbcn-3A	C;C	C	C	0.651555	0.00761229	Rbcn-3A	Dmel	FBgn0023458	CG3585		NA	NA	1	NA	NA	0	0	0	0	0	0
X	928306	928312	7	FBgn0040339	FBtr0070165	MED22	C;C	C	C	0.534039	0.0162233	MED22	Dmel	FBgn0040339	CG3034	CG18830	NA	NA	1	NA	NA	0	0	0	0	0	0
3R	6662951	6662957	7	FBgn0002522	FBtr0081696	lab	C;C	C	C	0.534039	0.0234724	lab	Dmel	FBgn0002522	CG1264		NA	5	1	NA	1	0	0	1	0	0	0
X	19511686	19511692	7	FBgn0031023	FBtr0307195	CG14200	C;C	C	C	0.651555	0.0390778	CG14200	Dmel	FBgn0031023	CG14200		NA	NA	1	NA	NA	0	0	1	0	0	0
2R	9822075	9822081	7	FBgn0050001	FBtr0088492	CG30001	C;C	C	C	0.651555	0.0206854	CG30001	Dmel	FBgn0050001	CG30001		NA	NA	1	NA	NA	0	0	0	0	0	0
3R	9745112	9745118	7	FBgn0085438	FBtr0331694	CG34409	C;C	C	C	0.651555	0.038351	CG34409	Dmel	FBgn0085438	CG34409	CG31412,CG31411,CG12949,CG34309	NA	5	1	NA	1	0	1	0	0	0	0
2R	22042331	22042337	7	FBgn0005778	FBtr0071806	PpD5	C;C	C	C	1	0.00942037	PpD5	Dmel	FBgn0005778	CG10138		NA	NA	1	NA	NA	0	0	0	0	0	0
2R	12210071	12210077	7	FBgn0020377	FBtr0303037	Sr-CII	C;C	C	C	0.651555	0.0490743	Sr-CII	Dmel	FBgn0020377	CG8856		NA	NA	1	NA	NA	0	1	0	0	0	0
3L	2650462	2650468	7	FBgn0027082	FBtr0072948	ProRS-m	C;C	C	C	0.651555	0.00640841	ProRS-m	Dmel	FBgn0027082	CG12186		3	NA	1	1	NA	0	0	0	0	1	0
3R	29943117	29943123	7	FBgn0039727	FBtr0085505	Vps13B	C;C	C	C	1	0.00945506	Vps13B	Dmel	FBgn0039727	CG15523		NA	NA	1	NA	NA	0	0	0	0	0	0
3L	15840822	15840828	7	FBgn0052150	FBtr0306853	meru	C;C	C	C	0.534039	0.0848867	meru	Dmel	FBgn0052150	CG32150	CG15714,CG12712	NA	NA	1	NA	NA	0	0	0	0	1	0
3L	8724041	8724047	7	FBgn0035923	FBtr0333887	CG6511	C;C	C	C	0.534039	0.0191379	CG6511	Dmel	FBgn0035923	CG6511		NA	NA	1	NA	NA	0	0	0	0	0	0
3R	6110137	6110143	7	FBgn0046876	FBtr0078618	Obp83ef	C;C	C	C	1	0.0013458	Obp83ef	Dmel	FBgn0046876	CG31557	CG15583	NA	NA	1	NA	NA	0	0	0	0	0	0
2R	6758179	6758185	7	FBgn0033101	FBtr0086134	CG9436	C;C	C	C	0.534039	0.0021188	CG9436	Dmel	FBgn0033101	CG9436		NA	NA	1	NA	NA	0	0	0	0	0	0
2L	19752885	19752891	7	FBgn0032817	FBtr0081324	CG10631	C;C	C	C	0.534039	0.00090111	CG10631	Dmel	FBgn0032817	CG10631		NA	NA	1	NA	NA	0	0	1	0	0	0
2R	7260766	7260772	7	FBgn0033154	FBtr0089022	CG1850	C;C	C	C	0.534039	0.137014	CG1850	Dmel	FBgn0033154	CG1850		NA	NA	1	NA	NA	0	0	0	0	0	0
2L	4379333	4379339	7	FBgn0026319	FBtr0334401	Traf4	C;C	C	C	1	0.0257162	Traf4	Dmel	FBgn0026319	CG3048		NA	NA	1	NA	NA	0	0	0	0	0	0
Y	3540117	3540123	7	FBgn0046698	FBtr0346673	Pp1-Y2	C;C	C	C	1	0.0716568	Pp1-Y2	Dmel	FBgn0046698	CG40448		NA	NA	1	NA	NA	0	0	0	0	0	0
2L	14976510	14976516	7	FBgn0086711	FBtr0111014	mol	C;C	C	C	0.534039	0.0304097	mol	Dmel	FBgn0086711	CG4482	CG15268	NA	NA	1	NA	NA	0	1	0	0	1	0
3L	16104656	16104662	7	FBgn0036570	FBtr0075495	IntS9	C;C	C	C	0.651555	0.0926404	IntS9	Dmel	FBgn0036570	CG5222		NA	NA	1	NA	NA	0	0	0	0	0	0
3R	13264531	13264537	7	FBgn0003598	FBtr0082736	Su(var)3-7	C;C	C	C	0.534039	0.000810028	Su(var)3-7	Dmel	FBgn0003598	CG8599		NA	NA	1	NA	NA	0	0	1	0	0	0
3R	24377596	24377602	7	FBgn0086610	FBtr0113461	CG33342	C;C	C	C	1	0.0104921	CG33342	Dmel	FBgn0086610	CG33342		NA	NA	1	NA	NA	0	0	0	0	0	0
2R	16872536	16872542	7	FBgn0025827	FBtr0087043	CG6421	C;C	C	C	0.534039	0.0744457	CG6421	Dmel	FBgn0025827	CG6421		NA	NA	1	NA	NA	0	0	0	0	0	0
2R	17853995	17854001	7	FBgn0050323	FBtr0273321	CG30323	C;C	C	C	0.651555	0.0196935	CG30323	Dmel	FBgn0050323	CG30323	CG11430	NA	NA	1	NA	NA	0	1	0	0	0	0
3L	25969147	25969153	7	FBgn0058178	FBtr0113818	CG40178	C;C	C	C	0.651555	0.0715629	l(3)80Fg	Dmel	FBgn0287183	CG40178		NA	NA	1	NA	NA	0	1	0	0	0	0
3R	23267325	23267331	7	FBgn0004882	FBtr0301491	orb	C;C	C	C	1	0.00352143	orb	Dmel	FBgn0004882	CG10868		3	NA	1	1	NA	1	0	0	0	1	0
3L	14763964	14763970	7	FBgn0036446	FBtr0075690	CG9384	C;C	C	C	1	0.00113516	Mgat4a	Dmel	FBgn0036446	CG9384		3	NA	1	1	NA	0	0	0	0	1	0
X	6581573	6581579	7	FBgn0085446	FBtr0303206	CG34417	C;C	C	C	0.534039	0.0245045	CG34417	Dmel	FBgn0085446	CG34417	CG3960,CG3950	3	NA	1	1	NA	0	0	0	0	0	0
2R	7830165	7830171	7	FBgn0042173	FBtr0089426	CG18853	C;C	C	C	0.534039	0.0364812	CG18853	Dmel	FBgn0042173	CG18853		NA	NA	1	NA	NA	0	0	0	0	0	0
3L	3942233	3942239	7	FBgn0027552	FBtr0073171	CG10863	C;C	C	C	1	0.0205053	CG10863	Dmel	FBgn0027552	CG10863		NA	NA	1	NA	NA	0	0	0	0	0	0
3L	4893311	4893317	7	FBgn0035581	FBtr0289982	Dnah3	C;C	C	C	0.651555	0.0317097	Dnah3	Dmel	FBgn0035581	CG17150		NA	NA	1	NA	NA	0	0	0	0	0	0
3R	24781127	24781133	7	FBgn0259233	FBtr0299843	CG42331	C;C	C	C	0.651555	0.0218957	CG42331	Dmel	FBgn0259233	CG42331	CG6879,CG13632	NA	5	1	NA	1	0	0	0	0	0	0
X	12794381	12794387	7	FBgn0259171	FBtr0333525	Pde9	C;C	C	C	0.651555	0.0215401	Pde9	Dmel	FBgn0259171	CG42276	CG3754,CG32648,CG3765,CG3761,CG1627	NA	NA	1	NA	NA	0	0	0	0	1	0
2R	7401199	7401205	7	FBgn0033164	FBtr0113047	CG11112	C;C	C	C	0.534039	0.308589	CG11112	Dmel	FBgn0033164	CG11112		NA	NA	1	NA	NA	0	0	0	0	1	0
3L	181247	181253	7	FBgn0035104	FBtr0334068	CG13875	C;C	C	C	0.534039	0.00193127	CG13875	Dmel	FBgn0035104	CG13875		NA	NA	1	NA	NA	0	0	0	0	0	0
2R	14201783	14201789	7	FBgn0005613	FBtr0087576	Sox15	C;C	C	C	0.534039	0.0207674	Sox15	Dmel	FBgn0005613	CG8404	CG13945	NA	NA	1	NA	NA	0	0	1	0	1	0
3L	9684691	9684697	7	FBgn0036030	FBtr0345034	CG6767	C;C	C	C	1	0.00210282	Prps	Dmel	FBgn0036030	CG6767		NA	NA	1	NA	NA	0	0	0	0	0	0
X	4369598	4369604	7	FBgn0029706	FBtr0070652	CG3626	C;C	C	C	0.534039	0.0608476	CG3626	Dmel	FBgn0029706	CG3626		NA	NA	1	NA	NA	0	0	0	0	0	0
X	13069851	13069857	7	FBgn0265597	FBtr0340351	rad	C;C	C	C	1	0.00407523	rad	Dmel	FBgn0265597	CG44424	CG15720,CG18646,CG42628,CG4346,CG42629,CG4368	NA	NA	1	NA	NA	0	0	0	0	1	0
2L	6832414	6832420	7	FBgn0051632	FBtr0345446	sens-2	C;C	C	C	0.651555	0.0214211	sens-2	Dmel	FBgn0051632	CG31632	CG17373,CG11243	NA	NA	1	NA	NA	0	1	1	0	1	0
X	12640731	12640737	7	FBgn0030412	FBtr0300375	Tomosyn	C;C	C	C	1	0.0704533	Tomosyn	Dmel	FBgn0030412	CG17762	CG2205,CG11056	NA	NA	1	NA	NA	0	1	0	0	0	0
2R	13398897	13398903	7	FBgn0033834	FBtr0087717	CG4744	C;C	C	C	0.534039	0.0264398	CG4744	Dmel	FBgn0033834	CG4744		NA	NA	1	NA	NA	0	0	0	0	0	0
2L	20791379	20791385	7	FBgn0250785	FBtr0089946	vari	C;C	C	C	0.534039	0.0165347	vari	Dmel	FBgn0250785	CG9326		NA	NA	1	NA	NA	0	0	0	0	0	0
X	11572039	11572045	7	FBgn0027259	FBtr0073541	Kmn1	C;C	C	C	1	0.00283476	Kmn1	Dmel	FBgn0027259	CG1558		NA	NA	1	NA	NA	0	0	0	0	1	0
X	11892203	11892209	7	FBgn0030352	FBtr0346165	sicily	C;C	C	C	0.651555	0.0312089	sicily	Dmel	FBgn0030352	CG15738		NA	NA	1	NA	NA	0	0	0	0	0	0
2L	19113794	19113800	7	FBgn0000075	FBtr0081153	amd	C;C	C	C	0.534039	0.0314989	amd	Dmel	FBgn0000075	CG10501	CG17345	NA	NA	1	NA	NA	0	0	0	0	0	0
3R	11235837	11235843	7	FBgn0037885	FBtr0304707	CG17721	C;C	C	C	0.651555	0.0510671	CG17721	Dmel	FBgn0037885	CG17721		NA	NA	1	NA	NA	0	0	0	0	0	0
3R	4639493	4639499	7	FBgn0037261	FBtr0078895	CG9775	C;C	C	C	0.534039	0.0102764	CG9775	Dmel	FBgn0037261	CG9775		NA	NA	1	NA	NA	0	0	0	0	0	0
3L	21345564	21345570	7	FBgn0037076	FBtr0078403	ebd2	C;C	C	C	0.534039	0.0208471	ebd2	Dmel	FBgn0037076	CG12972		NA	NA	1	NA	NA	0	0	0	0	0	0
2L	5548633	5548639	7	FBgn0031717	FBtr0307063	Oscillin	C;C	C	C	0.534039	0.0675883	Oscillin	Dmel	FBgn0031717	CG6957		3	NA	1	1	NA	0	0	0	0	0	0
2L	8661268	8661274	7	FBgn0011259	FBtr0303879	Sema1a	C;C	C	C	0.534039	0.190302	Sema1a	Dmel	FBgn0011259	CG18405		3	NA	1	1	NA	0	1	0	0	0	0
3R	12421389	12421395	7	FBgn0038042	FBtr0082596	Scgbeta	C;C	C	C	1	0.021669	Scgbeta	Dmel	FBgn0038042	CG5657		NA	NA	1	NA	NA	0	1	0	1	0	0
3R	7532204	7532210	7	FBgn0003885	FBtr0081538	alphaTub84D	C;C	C	C	1	0.0300204	alphaTub84D	Dmel	FBgn0003885	CG2512		NA	NA	1	NA	NA	0	0	0	0	0	0
3R	23677988	23677994	7	FBgn0039098	FBtr0084434	GILT3	C;C	C	C	1	0.0231881	GILT3	Dmel	FBgn0039098	CG13822		NA	NA	1	NA	NA	0	0	0	0	0	0
3R	27744478	27744484	7	FBgn0005659	FBtr0339318	Ets98B	C;C	C	C	0.534039	0.00713181	Ets98B	Dmel	FBgn0005659	CG5583		NA	5	1	NA	1	0	0	1	0	0	0
3L	5560909	5560915	7	FBgn0010894	FBtr0077136	sinu	C;C	C	C	0.534039	0.00291735	sinu	Dmel	FBgn0010894	CG10624		NA	NA	1	NA	NA	0	1	0	0	0	0
3R	4331776	4331782	7	FBgn0027866	FBtr0078955	CG9776	C;C	C	C	1	0.00761808	CG9776	Dmel	FBgn0027866	CG9776		NA	NA	1	NA	NA	0	0	1	0	0	0
3L	13043582	13043588	7	FBgn0011284	FBtr0346390	RpS4	C;C	C	C	0.651555	0.0130481	RpS4	Dmel	FBgn0011284	CG11276		NA	NA	1	NA	NA	1	0	0	0	1	0
X	2202682	2202688	7	FBgn0023550	FBtr0070423	FarO	C;C	C	C	0.534039	0.0338395	FarO	Dmel	FBgn0023550	CG18031		NA	NA	1	NA	NA	0	1	0	0	0	0
3L	22261442	22261448	7	FBgn0028500	FBtr0078512	Rich	C;C	C	C	0.651555	0.0355154	Rich	Dmel	FBgn0028500	CG9063		NA	NA	1	NA	NA	0	0	0	0	1	0
2L	15882919	15882925	7	FBgn0265668	FBtr0340573	CG44475	C;C	C	C	1	0.00691066	CG44475	Dmel	FBgn0265668	CG44475		NA	NA	1	NA	NA	0	0	0	0	0	0
2R	10467693	10467699	7	FBgn0033526	FBtr0088310	Caf1-105	C;C	C	C	0.534039	0.00996354	Caf1-105	Dmel	FBgn0033526	CG12892		NA	NA	1	NA	NA	0	0	0	0	0	0
2L	2148939	2148945	7	FBgn0027509	FBtr0077829	TBCD	C;C	C	C	1	0.0215003	TBCD	Dmel	FBgn0027509	CG7261		NA	NA	1	NA	NA	0	0	0	0	0	0
2L	4443935	4443941	7	FBgn0027609	FBtr0077457	morgue	C;C	C	C	0.651555	0.0210596	morgue	Dmel	FBgn0027609	CG15437		NA	NA	1	NA	NA	0	0	0	0	0	0
2L	14348657	14348663	7	FBgn0028530	FBtr0080641	mTTF	C;C	C	C	1	0.000131071	mTTF	Dmel	FBgn0028530	CG18124		NA	NA	1	NA	NA	0	0	0	0	0	0
3R	24256520	24256526	7	FBgn0011225	FBtr0301367	jar	C;C	C	C	1	0.0371826	jar	Dmel	FBgn0011225	CG5695		NA	NA	1	NA	NA	0	0	0	0	1	0
3L	834816	834822	7	FBgn0260755	FBtr0301252	CG42553	C;C	C	C	0.651555	0.0772187	CG42553	Dmel	FBgn0260755	CG42553	CG13886	NA	NA	1	NA	NA	0	0	0	0	1	0
3R	27159154	27159160	7	FBgn0039494	FBtr0085111	grass	C;C	C	C	0.651555	0.105594	grass	Dmel	FBgn0039494	CG5896		NA	5	1	NA	1	0	0	0	0	0	0
2R	2.47783e+07	2.47783e+07	7	FBgn0086908	FBtr0112777	egg	C;C	C	C	0.651555	0.0109289	egg	Dmel	FBgn0086908	CG12196	CG30426,CG30422	NA	NA	1	NA	NA	0	0	1	0	0	0
3R	23482177	23482183	7	FBgn0051225	FBtr0290293	Ir94f	C;C	C	C	0.534039	0.00284073	Ir94f	Dmel	FBgn0051225	CG31225		NA	NA	1	NA	NA	0	1	0	0	0	0
X	1.14101e+07	1.14101e+07	7	FBgn0030296	FBtr0300849	CG15196	C;C	C	C	0.651555	0.0384069	CG15196	Dmel	FBgn0030296	CG15196		NA	NA	1	NA	NA	0	0	0	0	0	0
3R	6451838	6451844	7	FBgn0037445	FBtr0330192	CG9727	C;C	C	C	0.651555	0.119415	CG9727	Dmel	FBgn0037445	CG9727		3	NA	1	1	NA	0	0	1	0	1	0
X	15829662	15829668	7	FBgn0000319	FBtr0074180	Chc	C;C	C	C	1	0.00538714	Chc	Dmel	FBgn0000319	CG9012		NA	NA	1	NA	NA	0	0	0	0	1	0
2R	17069343	17069349	7	FBgn0050460	FBtr0087011	CG30460	C;C	C	C	1	0.0110472	CG30460	Dmel	FBgn0050460	CG30460	CG15607,CG15608	NA	NA	1	NA	NA	0	0	0	0	0	0
3R	3867075	3867081	7	FBgn0039955	FBtr0113991	CG41099	C;C	C	C	0.651555	0.00640672	CG41099	Dmel	FBgn0039955	CG41099	CG17419,CG17416	3	NA	1	1	NA	0	0	0	0	0	0
3R	11793493	11793499	7	FBgn0025802	FBtr0082529	Sbf	C;C	C	C	0.651555	0.0610589	Sbf	Dmel	FBgn0025802	CG6939		NA	NA	1	NA	NA	0	0	0	0	0	0
3L	3086421	3086427	7	FBgn0035397	FBtr0072994	CG11486	C;C	C	C	0.651555	0.00824612	PAN3	Dmel	FBgn0035397	CG11486		NA	NA	1	NA	NA	1	0	0	0	0	0
X	11347596	11347602	7	FBgn0030289	FBtr0290227	GCS1	C;C	C	C	1	0.0199697	GCS1	Dmel	FBgn0030289	CG1597		NA	NA	1	NA	NA	0	1	0	0	0	0
X	16524866	16524872	7	FBgn0264077	FBtr0074299	Cnx14D	C;C	C	C	0.534039	0.00614785	Cnx14D	Dmel	FBgn0264077	CG9906		NA	NA	1	NA	NA	0	1	0	0	0	0
2L	20644289	20644295	7	FBgn0016054	FBtr0336829	phr6-4	C;C	C	C	1	0.00472031	phr6-4	Dmel	FBgn0016054	CG2488		NA	NA	1	NA	NA	0	0	0	0	0	0
2R	18129922	18129928	7	FBgn0040465	FBtr0086734	Dlip3	C;C	C	C	0.534039	0.00335059	Dlip3	Dmel	FBgn0040465	CG12767		NA	NA	1	NA	NA	0	0	1	0	0	0
2L	4193454	4193460	7	FBgn0031589	FBtr0077481	CG3714	C;C	C	C	0.534039	0.00492612	Naprt	Dmel	FBgn0031589	CG3714		NA	NA	1	NA	NA	0	0	0	0	0	0
3R	22410257	22410263	7	FBgn0038961	FBtr0337046	CG13850	C;C	C	C	0.534039	0.780926	CG13850	Dmel	FBgn0038961	CG13850		NA	NA	1	NA	NA	0	0	0	0	1	0
3L	7251308	7251314	7	FBgn0035755	FBtr0309299	CG14830	C;C	C	C	0.651555	0.0698844	CG14830	Dmel	FBgn0035755	CG14830		NA	NA	1	NA	NA	0	1	0	0	0	0
3R	18219662	18219668	7	FBgn0038583	FBtr0336471	CG7183	C;C	C	C	0.534039	0.0330626	CG7183	Dmel	FBgn0038583	CG7183		NA	NA	1	NA	NA	0	0	0	0	1	0
3R	23059088	23059094	7	FBgn0053193	FBtr0303509	sav	C;C	C	C	0.534039	0.0346145	sav	Dmel	FBgn0053193	CG33193	CG13831,CG13832	NA	5	1	NA	1	0	0	0	0	0	0
2R	13665489	13665495	7	FBgn0033863	FBtr0087626	CG13337	C;C	C	C	0.651555	0.0828032	CG13337	Dmel	FBgn0033863	CG13337		NA	NA	1	NA	NA	0	0	0	0	0	0
2L	5282699	5282705	7	FBgn0031696	FBtr0346455	Bub1	C;C	C	C	0.651555	0.00313686	Bub1	Dmel	FBgn0031696	CG14030		NA	NA	1	NA	NA	0	0	0	0	0	0
3L	8321027	8321033	7	FBgn0035873	FBtr0076708	CG13670	C;C	C	C	1	0.000203248	CG13670	Dmel	FBgn0035873	CG13670		NA	NA	1	NA	NA	0	1	0	0	0	0
4	36893	36899	7	FBgn0025740	FBtr0308297	PlexB	C;C	C	C	0.651555	0.022454	PlexB	Dmel	FBgn0025740	CG17245		NA	NA	1	NA	NA	0	1	0	0	1	0
2R	17037214	17037220	7	FBgn0023172	FBtr0086971	RhoGEF2	C;C	C	C	1	0.0384606	RhoGEF2	Dmel	FBgn0023172	CG9635		3	NA	1	1	NA	0	0	0	0	0	0
X	19587867	19587873	7	FBgn0031033	FBtr0074769	CG14219	C;C	C	C	1	0.0198115	CG14219	Dmel	FBgn0031033	CG14219		NA	NA	1	NA	NA	0	1	0	0	0	0
3L	853327	853333	7	FBgn0035170	FBtr0072594	dpr20	C;C	C	C	1	0.00695421	dpr20	Dmel	FBgn0035170	CG12191		NA	5	1	NA	1	0	1	0	0	0	0
3L	11710255	11710261	7	FBgn0261381	FBtr0302272	mtTFB1	C;C	C	C	0.534039	0.0184795	mtTFB1	Dmel	FBgn0261381	CG42631	CG7319	NA	NA	1	NA	NA	0	0	0	0	0	0
X	9630197	9630203	7	FBgn0028341	FBtr0071407	Ptpmeg2	C;C	C	C	1	0.000637116	Ptpmeg2	Dmel	FBgn0028341	CG32697	CG3101,CG3102	3	NA	1	1	NA	0	0	0	0	1	0
2L	15049654	15049660	7	FBgn0000317	FBtr0343686	ck	C;C	C	C	0.534039	0.150121	ck	Dmel	FBgn0000317	CG7595		NA	NA	1	NA	NA	0	0	0	0	0	0
3L	9807775	9807781	7	FBgn0044328	FBtr0347598	CG32052	C;C	C	C	1	0.176623	CG32052	Dmel	FBgn0044328	CG32052	CG8163	NA	5	1	NA	1	0	0	0	0	0	0
3R	12463805	12463811	7	FBgn0038058	FBtr0082680	CG5608	C;C	C	C	1	0.00833259	CG5608	Dmel	FBgn0038058	CG5608		NA	NA	1	NA	NA	0	0	0	0	1	0
2R	19659363	19659369	7	FBgn0034463	FBtr0086471	CG15125	C;C	C	C	1	0.0860422	CG15125	Dmel	FBgn0034463	CG15125		NA	NA	1	NA	NA	0	0	0	0	0	0
X	583037	583043	7	FBgn0261930	FBtr0110929	vnd	C;C	C	C	1	0.085227	vnd	Dmel	FBgn0261930	CG6172		NA	NA	1	NA	NA	0	0	1	0	0	0
3R	6491332	6491338	7	FBgn0037448	FBtr0081673	CG15186	C;C	C	C	0.534039	0.00205964	CG15186	Dmel	FBgn0037448	CG15186		NA	NA	1	NA	NA	0	0	0	0	0	0
3R	24661416	24661422	7	FBgn0020018	FBtr0084664	Ppox	C;C	C	C	1	0.00356769	Ppox	Dmel	FBgn0020018	CG5796		NA	NA	1	NA	NA	0	0	0	0	0	0
X	9242327	9242333	7	FBgn0260789	FBtr0343367	mxc	C;C	C	C	0.534039	0.0533025	mxc	Dmel	FBgn0260789	CG12124	CG12058	NA	NA	1	NA	NA	1	0	1	0	1	0
X	17067402	17067408	7	FBgn0262487	FBtr0304841	CG43077	C;C	C	C	0.651555	0.0221509	CG43077	Dmel	FBgn0262487	CG43077		NA	NA	1	NA	NA	0	0	0	0	0	0
3R	29620268	29620274	7	FBgn0039674	FBtr0085447	CG1907	C;C	C	C	0.534039	0.00384119	CG1907	Dmel	FBgn0039674	CG1907		NA	NA	1	NA	NA	0	1	0	0	0	0
2R	11617773	11617779	7	FBgn0086712	FBtr0088090	Egm	C;C	C	C	0.534039	0.0129928	Egm	Dmel	FBgn0086712	CG9006		NA	NA	1	NA	NA	0	0	0	0	0	0
3L	8531949	8531955	7	FBgn0024236	FBtr0331418	foi	C;C	C	C	0.534039	0.0063205	foi	Dmel	FBgn0024236	CG6817		3	NA	1	1	NA	0	1	0	0	1	0
X	14876943	14876949	7	FBgn0266435	FBtr0344424	CG45065	C;C	C	C	0.534039	0.173155	CG45065	Dmel	FBgn0266435	CG45065	CG9517	NA	NA	1	NA	NA	0	0	0	0	0	0
3R	31108628	31108634	7	FBgn0039818	FBtr0085739	CG11318	C;C	C	C	0.651555	0.00312861	CG11318	Dmel	FBgn0039818	CG11318		NA	NA	1	NA	NA	0	1	0	0	0	0
2L	6034094	6034100	7	FBgn0031765	FBtr0079224	CG9109	C;C	C	C	0.651555	0.025055	CG9109	Dmel	FBgn0031765	CG9109		NA	NA	1	NA	NA	0	0	0	0	0	0
2R	24135941	24135947	7	FBgn0034982	FBtr0100398	Naa35	C;C	C	C	0.651555	0.00137166	Naa35	Dmel	FBgn0034982	CG4065		NA	NA	1	NA	NA	0	1	0	0	0	0
3L	20474074	20474080	7	FBgn0036998	FBtr0078198	CG5969	C;C	C	C	1	0.0523606	CG5969	Dmel	FBgn0036998	CG5969	CG32426	NA	NA	1	NA	NA	0	1	0	0	1	0
3R	18673683	18673689	7	FBgn0038638	FBtr0083664	CG7702	C;C	C	C	0.534039	0.212268	CG7702	Dmel	FBgn0038638	CG7702		NA	NA	1	NA	NA	0	1	0	0	0	0
2R	13299853	13299859	7	FBgn0033827	FBtr0345663	CG17047	C;C	C	C	1	0.000533941	CG17047	Dmel	FBgn0033827	CG17047		NA	NA	1	NA	NA	0	0	0	0	0	0
3L	693438	693444	7	FBgn0035157	FBtr0072606	CG13894	C;C	C	C	1	0.0279247	CG13894	Dmel	FBgn0035157	CG13894		NA	NA	1	NA	NA	0	0	0	0	0	0
2L	17435467	17435473	7	FBgn0032636	FBtr0080980	CG5043	C;C	C	C	0.534039	0.0899167	CG5043	Dmel	FBgn0032636	CG5043		NA	NA	1	NA	NA	0	0	0	0	0	0
2R	11624073	11624079	7	FBgn0033638	FBtr0306029	CG9005	C;C	C	C	0.651555	0.0885457	CG9005	Dmel	FBgn0033638	CG9005		NA	NA	1	NA	NA	0	0	0	0	0	0
2R	12042246	12042252	7	FBgn0004463	FBtr0087977	RpIII128	C;C	C	C	1	0.0193803	Polr3B	Dmel	FBgn0004463	CG8344		NA	NA	1	NA	NA	0	0	0	0	1	0
X	2608046	2608052	7	FBgn0011566	FBtr0070447	Smyd3	C;C	C	C	1	0.0124205	Smyd3	Dmel	FBgn0011566	CG13761		NA	NA	1	NA	NA	1	0	0	0	0	0
X	316002	316008	7	FBgn0029521	FBtr0070070	Or1a	C;C	C	C	0.534039	0.00788019	Or1a	Dmel	FBgn0029521	CG17885		NA	NA	1	NA	NA	0	1	0	0	0	0
X	3492096	3492102	7	FBgn0029667	FBtr0070589	Gas8	C;C	C	C	0.534039	0.0209741	Gas8	Dmel	FBgn0029667	CG14271		NA	NA	1	NA	NA	0	0	0	0	0	0
3R	7790739	7790745	7	FBgn0037517	FBtr0081744	CG10086	C;C	C	C	0.651555	0.157062	CG10086	Dmel	FBgn0037517	CG10086		NA	NA	1	NA	NA	0	0	0	0	0	0
3R	11974164	11974170	7	FBgn0260744	FBtr0082508	Tango9	C;C	C	C	0.534039	0.0170197	Tango9	Dmel	FBgn0260744	CG10007		NA	NA	1	NA	NA	0	1	0	0	0	0
2R	12568168	12568174	7	FBgn0033753	FBtr0087824	Cyp301a1	C;C	C	C	0.651555	0.00157485	Cyp301a1	Dmel	FBgn0033753	CG8587		NA	NA	1	NA	NA	0	0	0	0	0	0
2R	8118777	8118783	7	FBgn0050372	FBtr0300954	Asap	C;C	C	C	0.651555	0.00319736	Asap	Dmel	FBgn0050372	CG30372	CG2226,CG14758	NA	5	1	NA	1	0	0	0	0	1	0
2L	16681972	16681978	7	FBgn0051807	FBtr0080944	CG31807	C;C	C	C	0.534039	0.0252452	CG31807	Dmel	FBgn0051807	CG31807		NA	NA	1	NA	NA	0	0	0	0	0	0
2R	8727888	8727894	7	FBgn0005695	FBtr0339337	gcl	C;C	C	C	1	8.95506e-05	gcl	Dmel	FBgn0005695	CG8411		NA	NA	1	NA	NA	0	0	0	0	0	0
2L	12697815	12697821	7	FBgn0032447	FBtr0340542	PICK1	C;C	C	C	0.534039	0.00080039	PICK1	Dmel	FBgn0032447	CG6167		NA	NA	1	NA	NA	0	0	0	0	0	0
3R	29296732	29296738	7	FBgn0039659	FBtr0334874	CG14506	C;C	C	C	0.534039	0.0608646	CG14506	Dmel	FBgn0039659	CG14506		NA	NA	1	NA	NA	1	0	0	0	0	0
2R	9692298	9692304	7	FBgn0023143	FBtr0088499	Uba1	C;C	C	C	0.651555	0.0606115	Uba1	Dmel	FBgn0023143	CG1782		NA	NA	1	NA	NA	0	1	0	0	0	0
3R	10708832	10708838	7	FBgn0051373	FBtr0082318	CG31373	C;C	C	C	0.651555	0.000492414	CG31373	Dmel	FBgn0051373	CG31373	CG6482	NA	NA	1	NA	NA	0	0	0	0	0	0
3L	16845706	16845712	7	FBgn0036668	FBtr0075330	Zcchc7	C;C	C	C	0.534039	0.016577	Zcchc7	Dmel	FBgn0036668	CG9715		NA	NA	1	NA	NA	0	0	0	0	1	0
3L	1761420	1761426	7	FBgn0013811	FBtr0303106	Dhc62B	C;C	C	C	1	0.221069	Dhc62B	Dmel	FBgn0013811	CG15804	CG18613	NA	NA	1	NA	NA	0	0	0	0	1	0
3L	7124332	7124338	7	FBgn0002775	FBtr0076926	msl-3	C;C	C	C	1	0.032806	msl-3	Dmel	FBgn0002775	CG8631		NA	NA	1	NA	NA	1	0	0	0	0	0
3R	15101108	15101114	7	FBgn0261859	FBtr0303485	CG42788	C;C	C	C	1	0.0537016	CG42788	Dmel	FBgn0261859	CG42788	CG31304,CG6934,CG6960,CG18442	3	NA	1	1	NA	0	0	0	0	0	0
2L	1843915	1843921	7	FBgn0051665	FBtr0089786	wry	C;C	C	C	0.651555	0.0888418	wry	Dmel	FBgn0051665	CG31665	CG15621,CG12704	NA	NA	1	NA	NA	0	1	0	0	0	0
2L	9540942	9540948	7	FBgn0032124	FBtr0079830	CG17855	C;C	C	C	0.651555	0.0298002	CG17855	Dmel	FBgn0032124	CG17855		NA	NA	1	NA	NA	0	0	0	0	0	0
2R	11458364	11458370	7	FBgn0000581	FBtr0330623	E(Pc)	C;C	C	C	1	0.000997101	E(Pc)	Dmel	FBgn0000581	CG7776		3	5	1	1	1	0	0	0	0	1	0
3R	28697331	28697337	7	FBgn0027655	FBtr0336788	htt	C;C	C	C	0.651555	0.00540758	htt	Dmel	FBgn0027655	CG9995		NA	NA	1	NA	NA	0	0	0	0	0	0
X	19673439	19673445	7	FBgn0031055	FBtr0308570	et	C;C	C	C	0.534039	0.00488871	et	Dmel	FBgn0031055	CG14225		NA	NA	1	NA	NA	0	1	0	0	0	0
3R	30628417	30628423	7	FBgn0039792	FBtr0335441	CG2267	C;C	C	C	0.534039	0.0780713	CG2267	Dmel	FBgn0039792	CG2267		NA	NA	1	NA	NA	0	0	0	0	0	0
3R	25599610	25599616	7	FBgn0011666	FBtr0333665	msi	C;C	C	C	0.534039	0.422604	msi	Dmel	FBgn0011666	CG5099		3	5	1	1	1	1	0	0	0	1	0
2L	23005643	23005649	7	FBgn0250907	FBtr0331166	Cht10	C;C	C	C	0.651555	0.0420081	Cht10	Dmel	FBgn0250907	CG18140	CG17682	NA	NA	1	NA	NA	0	0	0	0	0	0
2L	3780372	3780378	7	FBgn0004893	FBtr0077490	bowl	C;C	C	C	1	0.0367916	bowl	Dmel	FBgn0004893	CG10021		NA	NA	1	NA	NA	0	0	1	0	0	0
3L	20235615	20235621	7	FBgn0036958	FBtr0074850	CG17233	C;C	C	C	0.534039	0.00890239	CG17233	Dmel	FBgn0036958	CG17233	CG6918	3	NA	1	1	NA	0	1	0	0	0	0
3R	29666129	29666135	7	FBgn0039675	FBtr0085448	ppk21	C;C	C	C	1	0.0221718	ppk21	Dmel	FBgn0039675	CG12048		NA	NA	1	NA	NA	0	1	0	0	0	0
2L	8711328	8711334	7	FBgn0003209	FBtr0340231	raw	C;C	C	C	1	0.00251116	raw	Dmel	FBgn0003209	CG12437	CG9321	NA	5	1	NA	1	0	0	0	0	1	0
3R	5598958	5598964	7	FBgn0250753	FBtr0078744	kra	C;C	C	C	0.534039	0.00985081	kra	Dmel	FBgn0250753	CG2922		NA	NA	1	NA	NA	0	0	0	0	1	0
X	1210929	1210935	7	FBgn0040367	FBtr0342728	CG11382	C;C	C	C	0.534039	0.00415941	CG11382	Dmel	FBgn0040367	CG11382		NA	NA	1	NA	NA	0	0	0	0	0	0
3R	19504026	19504032	7	FBgn0260003	FBtr0083766	Dys	C;C	C	C	0.534039	0.00567591	Dys	Dmel	FBgn0260003	CG34157	CG31175,CG7344,CG7243,CG7240,CG17750	NA	5	1	NA	1	0	0	0	1	0	0
X	1851393	1851399	7	FBgn0283741	FBtr0302656	prage	C;C	C	C	1	0.0473761	prage	Dmel	FBgn0283741	CG42666	CG14801,CG14799,CG14800,CG17968	NA	NA	1	NA	NA	0	0	0	0	1	0
2R	16288816	16288822	7	FBgn0050099	FBtr0087180	CG30099	C;C	C	C	0.534039	0.0489119	CG30099	Dmel	FBgn0050099	CG30099	CG7750	NA	NA	1	NA	NA	0	0	0	0	0	0
2L	2879414	2879420	7	FBgn0028970	FBtr0077631	betaggt-II	C;C	C	C	0.651555	0.0129005	RabGGTb	Dmel	FBgn0028970	CG18627		NA	NA	1	NA	NA	0	0	0	0	1	0
3R	10323195	10323201	7	FBgn0266717	FBtr0331684	Bruce	C;C	C	C	1	0.00658548	Bruce	Dmel	FBgn0266717	CG6303		3	NA	1	1	NA	0	0	0	0	0	0
2R	17578812	17578818	7	FBgn0034246	FBtr0086904	Dcr-2	C;C	C	C	1	0.0296059	Dcr-2	Dmel	FBgn0034246	CG6493		NA	NA	1	NA	NA	1	0	0	0	0	0
X	2079392	2079398	7	FBgn0040394	FBtr0070434	CG16903	C;C	C	C	1	0.00598793	CG16903	Dmel	FBgn0040394	CG16903		NA	NA	1	NA	NA	0	0	0	0	1	0
X	1.80251e+07	1.80251e+07	7	FBgn0030887	FBtr0089574	CG6867	C;C	C	C	1	0.0656547	CG6867	Dmel	FBgn0030887	CG6867		NA	NA	1	NA	NA	0	1	0	0	0	0
3L	653821	653827	7	FBgn0035149	FBtr0072558	MED30	C;C	C	C	0.534039	0.0298582	MED30	Dmel	FBgn0035149	CG17183		NA	NA	1	NA	NA	0	0	0	0	0	0
3L	272874	272880	7	FBgn0052845	FBtr0072518	CG32845	C;C	C	C	1	0.0775237	CG32845	Dmel	FBgn0052845	CG32845		NA	NA	1	NA	NA	0	0	0	0	0	0
4	378524	378530	7	FBgn0262636	FBtr0089129	dati	C;C	C	C	0.534039	0.0333032	dati	Dmel	FBgn0262636	CG2052	CG10204	NA	NA	1	NA	NA	0	0	1	0	0	0
2L	3873981	3873987	7	FBgn0000256	FBtr0290080	capu	C;C	C	C	0.534039	0.0674164	capu	Dmel	FBgn0000256	CG3399	CG15420	NA	NA	1	NA	NA	0	0	0	0	0	0
X	18773290	18773296	7	FBgn0030954	FBtr0113003	CCKLR-17D3	C;C	C	C	1	5.55824e-05	CCKLR-17D3	Dmel	FBgn0030954	CG32540	CG6894,CG6881,CG6861	NA	NA	1	NA	NA	0	1	0	0	0	0
3L	15562029	15562035	7	FBgn0036509	FBtr0075596	CG7739	C;C	C	C	0.651555	0.0117282	CG7739	Dmel	FBgn0036509	CG7739		NA	NA	1	NA	NA	0	1	0	0	0	0
2R	21686851	21686857	7	FBgn0003687	FBtr0071679	Tbp	C;C	C	C	1	0.00601344	Tbp	Dmel	FBgn0003687	CG9874		NA	NA	1	NA	NA	0	0	0	0	0	0
2L	139882	139888	7	FBgn0051975	FBtr0302196	CG31975	C;C	C	C	0.651555	0.403496	CG31975	Dmel	FBgn0051975	CG31975	CG18501	NA	NA	1	NA	NA	0	0	0	0	0	0
3R	18410557	18410563	7	FBgn0038621	FBtr0083654	CG10864	C;C	C	C	0.651555	0.034161	CG10864	Dmel	FBgn0038621	CG10864		NA	NA	1	NA	NA	0	1	0	0	0	0
X	17082363	17082369	7	FBgn0030814	FBtr0074382	CG4955	C;C	C	C	1	0.0149233	CG4955	Dmel	FBgn0030814	CG4955		NA	NA	1	NA	NA	0	1	0	0	0	0
3R	4778831	4778837	7	FBgn0037275	FBtr0078881	CG14655	C;C	C	C	0.534039	0.0893271	CG14655	Dmel	FBgn0037275	CG14655		NA	NA	1	NA	NA	0	0	1	0	1	0
3R	30040331	30040337	7	FBgn0003511	FBtr0346861	Sry-beta	C;C	C	C	0.534039	0.66124	Sry-beta	Dmel	FBgn0003511	CG7938		NA	NA	1	NA	NA	0	0	1	0	0	0
2L	20931892	20931898	7	FBgn0032908	FBtr0306031	CG9270	C;C	C	C	1	0.0437752	CG9270	Dmel	FBgn0032908	CG9270		NA	5	1	NA	1	0	1	0	0	0	0
3L	17398721	17398727	7	FBgn0027660	FBtr0339898	blot	C;C	C	C	0.651555	0.0600485	blot	Dmel	FBgn0027660	CG3897		NA	NA	1	NA	NA	0	1	0	0	0	0
2L	15008365	15008371	7	FBgn0028926	FBtr0080695	NC2beta	C;C	C	C	0.534039	0.00639745	NC2beta	Dmel	FBgn0028926	CG4185		NA	NA	1	NA	NA	0	0	1	0	0	0
3L	20268437	20268443	7	FBgn0052228	FBtr0074836	CG32228	C;C	C	C	0.651555	0.0494147	CG32228	Dmel	FBgn0052228	CG32228		NA	NA	1	NA	NA	0	0	0	0	0	0
3R	18982195	18982201	7	FBgn0022338	FBtr0321263	dnk	C;C	C	C	0.651555	0.00440989	dnk	Dmel	FBgn0022338	CG5452		NA	NA	1	NA	NA	0	0	0	0	1	0
2L	9517275	9517281	7	FBgn0032120	FBtr0089854	CG33298	C;C	C	C	0.534039	0.00730805	CG33298	Dmel	FBgn0032120	CG33298	CG18419,CG13112	NA	NA	1	NA	NA	0	1	0	0	0	0
2L	13233979	13233985	7	FBgn0032493	FBtr0080481	Mabi	C;C	C	C	0.534039	0.0178257	Mabi	Dmel	FBgn0032493	CG15479		NA	NA	1	NA	NA	0	0	0	0	0	0
X	10591562	10591568	7	FBgn0001206	FBtr0071511	Hmr	C;C	C	C	1	0.00442584	Hmr	Dmel	FBgn0001206	CG1619		3	NA	1	1	NA	0	0	1	0	0	0
2R	17647896	17647902	7	FBgn0050106	FBtr0086893	CCHa1-R	C;C	C	C	1	0.112637	CCHa1-R	Dmel	FBgn0050106	CG30106	CG14484,CG18192	NA	NA	1	NA	NA	0	1	0	0	0	0
2L	27228	27234	7	FBgn0051973	FBtr0309228	Cda5	C;C	C	C	0.651555	0.219743	Cda5	Dmel	FBgn0051973	CG31973	CG2761,CG2776	NA	NA	1	NA	NA	0	0	0	0	0	0
3R	9984809	9984815	7	FBgn0037770	FBtr0333687	Art4	C;C	C	C	1	0.000922944	Art4	Dmel	FBgn0037770	CG5358		NA	NA	1	NA	NA	0	0	0	0	0	0
3L	5135345	5135351	7	FBgn0035593	FBtr0077164	CG4603	C;C	C	C	1	0.0190677	CG4603	Dmel	FBgn0035593	CG4603		NA	NA	1	NA	NA	0	0	0	0	0	0
X	15516201	15516207	7	FBgn0022710	FBtr0100142	Ac13E	C;C	C	C	0.534039	0.0128231	Ac13E	Dmel	FBgn0022710	CG9210		NA	NA	1	NA	NA	0	1	0	0	0	0
X	1863037	1863043	7	FBgn0023515	FBtr0339494	CG14814	C;C	C	C	0.651555	0.00979053	Gcna	Dmel	FBgn0023515	CG14814		NA	NA	1	NA	NA	0	0	0	0	1	0
3R	11701778	11701784	7	FBgn0037939	FBtr0082426	CG14718	C;C	C	C	1	0.00718826	CG14718	Dmel	FBgn0037939	CG14718		NA	NA	1	NA	NA	1	0	0	0	0	0
2L	6192850	6192856	7	FBgn0085409	FBtr0329980	smal	C;C	C	C	0.534039	0.00183104	smal	Dmel	FBgn0085409	CG34380	CG31640,CG13988,CG15813,CG13987,CG13986	NA	NA	1	NA	NA	0	1	0	0	0	0
3R	15261112	15261118	7	FBgn0263755	FBtr0310385	Su(var)3-9	C;C	C	C	0.534039	0.119452	Su(var)3-9	Dmel	FBgn0263755	CG43664	CG6476	NA	NA	1	NA	NA	0	0	0	0	0	0
2L	19483928	19483934	7	FBgn0032787	FBtr0332318	CG10195	C;C	C	C	0.651555	0.00257824	CG10195	Dmel	FBgn0032787	CG10195		NA	NA	1	NA	NA	0	0	0	0	0	0
2R	11655661	11655667	7	FBgn0033640	FBtr0088072	CG13198	C;C	C	C	0.534039	0.125305	CG13198	Dmel	FBgn0033640	CG13198		NA	NA	1	NA	NA	0	0	0	0	0	0
X	11247292	11247298	7	FBgn0265595	FBtr0340336	CG44422	C;C	C	C	1	0.0547896	CG44422	Dmel	FBgn0265595	CG44422	CG11105,CG12625,CG34144,CG42683	3	NA	1	1	NA	0	0	0	0	1	0
2L	11014500	11014506	7	FBgn0032330	FBtr0331197	Samuel	C;C	C	C	1	0.00458457	Samuel	Dmel	FBgn0032330	CG31868	CG14917,CG14918,CG12291	NA	NA	1	NA	NA	0	0	0	0	0	0
2L	15853707	15853713	7	FBgn0028903	FBtr0080787	CG13243	C;C	C	C	1	0.017473	CG13243	Dmel	FBgn0028903	CG13243		NA	NA	1	NA	NA	0	0	0	0	1	0
3R	2.89239e+07	2.89239e+07	7	FBgn0039616	FBtr0308601	CG11828	C;C	C	C	0.651555	0.12418	CG11828	Dmel	FBgn0039616	CG11828		NA	NA	1	NA	NA	0	1	0	0	0	0
3L	19971210	19971216	7	FBgn0004852	FBtr0074897	Ac76E	C;C	C	C	1	0.113518	Ac76E	Dmel	FBgn0004852	CG7978		NA	NA	1	NA	NA	0	1	0	0	0	0
2R	18743138	18743144	7	FBgn0034382	FBtr0086643	CG18609	C;C	C	C	1	0.0164806	CG18609	Dmel	FBgn0034382	CG18609		NA	NA	1	NA	NA	0	1	0	0	0	0
2L	16740634	16740640	7	FBgn0032598	FBtr0080892	ChLD3	C;C	C	C	1	0.000214421	ChLD3	Dmel	FBgn0032598	CG17905		NA	NA	1	NA	NA	0	0	0	0	0	0
3R	15535481	15535487	7	FBgn0267408	FBtr0083154	AOX1	C;C	C	C	0.534039	0.0284893	AOX1	Dmel	FBgn0267408	CG18522		NA	NA	1	NA	NA	0	0	0	0	0	0
3R	22460889	22460895	7	FBgn0028688	FBtr0084294	Rpn7	C;C	C	C	1	0.00445315	Rpn7	Dmel	FBgn0028688	CG5378		NA	NA	1	NA	NA	0	0	0	0	1	0
3R	9754998	9755004	7	FBgn0037742	FBtr0301536	Rpt3R	C;C	C	C	1	0.00501253	Rpt3R	Dmel	FBgn0037742	CG9475		NA	NA	1	NA	NA	0	0	0	0	0	0
3R	23203636	23203642	7	FBgn0011596	FBtr0084399	fzo	C;C	C	C	0.651555	0.0537182	fzo	Dmel	FBgn0011596	CG4568		NA	NA	1	NA	NA	0	1	0	0	0	0
2L	15424672	15424678	7	FBgn0001983	FBtr0080740	wor	C;C	C	C	0.534039	0.00330806	wor	Dmel	FBgn0001983	CG4158		NA	NA	1	NA	NA	0	0	1	0	0	0
2L	4000682	4000688	7	FBgn0264341	FBtr0332007	CG43797	C;C	C	C	0.651555	0.0262101	CG43797	Dmel	FBgn0264341	CG43797		NA	NA	1	NA	NA	0	0	0	0	0	0
2L	19080469	19080475	7	FBgn0002023	FBtr0329940	Lim3	C;C	C	C	1	0.0115572	Lim3	Dmel	FBgn0002023	CG10699	CG15174	NA	NA	1	NA	NA	0	0	1	0	0	0
2R	7523913	7523919	7	FBgn0022772	FBtr0088959	Orc1	C;C	C	C	0.534039	0.0145502	Orc1	Dmel	FBgn0286788	CG10667		NA	NA	1	NA	NA	0	0	0	0	0	0
2R	7634994	7635000	7	FBgn0263077	FBtr0331951	CG43340	C;C	C	C	0.534039	0.0582974	M7BP	Dmel	FBgn0263077	CG43340	CG30492,CG30494,CG17984,CG17983,CG2088,CG2080	3	5	1	1	1	0	0	0	0	0	0
X	4098900	4098906	7	FBgn0029693	FBtr0070671	CG6379	C;C	C	C	1	0.407723	Cmtr1	Dmel	FBgn0029693	CG6379		NA	NA	1	NA	NA	0	0	0	0	0	0
2L	22538556	22538562	7	FBgn0040009	FBtr0344794	CG17490	C;C	C	C	1	0.0582683	CG17490	Dmel	FBgn0040009	CG17490		NA	NA	1	NA	NA	0	0	0	0	0	0
2L	21518158	21518164	7	FBgn0053876	FBtr0091880	His2B:CG33876	C;C	C	C	0.534039	0.0633356	His2B:CG33876	Dmel	FBgn0053876	CG33876		NA	NA	1	NA	NA	0	0	0	0	0	0
X	5914135	5914141	7	FBgn0029823	FBtr0070827	Shmt	C;C	C	C	0.534039	0.0742382	Shmt	Dmel	FBgn0029823	CG3011		NA	NA	1	NA	NA	0	0	0	0	0	0
3L	16283450	16283456	7	FBgn0036593	FBtr0075475	CG13048	C;C	C	C	1	0.0317447	CG13048	Dmel	FBgn0036593	CG13048		NA	NA	1	NA	NA	0	0	0	0	0	0
2L	16327447	16327453	7	FBgn0014092	FBtr0080834	CG4278	C;C	C	C	0.534039	0.0745635	CG4278	Dmel	FBgn0014092	CG4278		NA	NA	1	NA	NA	0	0	0	0	0	0
2L	21669865	21669871	7	FBgn0032957	FBtr0085917	CG2225	C;C	C	C	0.534039	0.0130876	CG2225	Dmel	FBgn0032957	CG2225		NA	NA	1	NA	NA	0	0	0	0	0	0
2L	21834719	21834725	7	FBgn0003866	FBtr0085906	tsh	C;C	C	C	1	0.0360577	tsh	Dmel	FBgn0003866	CG1374		NA	NA	1	NA	NA	0	0	1	0	0	0
3R	20748820	20748826	7	FBgn0265606	FBtr0083928	Prosalpha4T1	C;C	C	C	0.534039	0.0806026	Prosalpha4T1	Dmel	FBgn0265606	CG17268		NA	NA	1	NA	NA	0	0	0	0	1	0
2R	23989067	23989073	7	FBgn0034950	FBtr0072160	Pask	C;C	C	C	0.534039	0.0332937	Pask	Dmel	FBgn0034950	CG3105		NA	NA	1	NA	NA	0	0	0	0	0	0
3L	19593475	19593481	7	FBgn0005386	FBtr0306010	ash1	C;C	C	C	0.534039	0.0302134	ash1	Dmel	FBgn0005386	CG8887		NA	NA	1	NA	NA	0	0	1	0	0	0
2R	23550613	23550619	7	FBgn0034878	FBtr0072113	pita	C;C	C	C	0.534039	0.00994216	pita	Dmel	FBgn0034878	CG3941		3	NA	1	1	NA	0	0	1	0	0	0
X	19572531	19572537	7	FBgn0031030	FBtr0074774	Tao	C;C	C	C	0.534039	0.00274067	Tao	Dmel	FBgn0031030	CG14217		NA	NA	1	NA	NA	0	0	0	0	1	0
3L	18203553	18203559	7	FBgn0036782	FBtr0310156	CG7320	C;C	C	C	0.651555	0.0328396	CG7320	Dmel	FBgn0036782	CG7320		NA	NA	1	NA	NA	0	0	0	0	0	0
3R	14884429	14884435	7	FBgn0038269	FBtr0113235	Rrp6	C;C	C	C	0.534039	0.0125533	Rrp6	Dmel	FBgn0038269	CG7292		NA	NA	1	NA	NA	0	0	0	0	1	0
2L	21537731	21537737	7	FBgn0053868	FBtr0091872	His2B:CG33868	C;C	C	C	0.534039	0.0697779	His2B:CG33868	Dmel	FBgn0053868	CG33868		NA	NA	1	NA	NA	0	0	0	0	0	0
3L	5874010	5874016	7	FBgn0035642	FBtr0331562	CG18586	C;C	C	C	1	0.0157656	CG18586	Dmel	FBgn0035642	CG18586		NA	NA	1	NA	NA	0	0	0	0	0	0
2L	7790066	7790072	7	FBgn0031948	FBtr0343406	CG7149	C;C	C	C	1	0.0156905	CG7149	Dmel	FBgn0031948	CG7149		3	NA	1	1	NA	0	1	0	0	0	0
2L	3318833	3318839	7	FBgn0031519	FBtr0331372	Fign	C;C	C	C	0.534039	0.0278617	Fign	Dmel	FBgn0031519	CG3326		NA	NA	1	NA	NA	0	0	0	0	0	0
3L	6066768	6066774	7	FBgn0259164	FBtr0299610	CG42269	C;C	C	C	0.651555	0.0227698	CG42269	Dmel	FBgn0259164	CG42269	CG6600,CG6596	NA	NA	1	NA	NA	0	1	0	0	1	0
3L	1465569	1465575	7	FBgn0004635	FBtr0072694	rho	C;C	C	C	0.534039	0.029854	rho	Dmel	FBgn0004635	CG1004		3	NA	1	1	NA	0	1	0	0	0	0
X	17286750	17286756	7	FBgn0024238	FBtr0074443	Fim	C;C	C	C	0.651555	0.0818815	Fim	Dmel	FBgn0024238	CG8649		NA	NA	1	NA	NA	0	0	0	0	0	0
3L	20151721	20151727	7	FBgn0261556	FBtr0332699	CG42674	C;C	C	C	1	0.0498781	CG42674	Dmel	FBgn0261556	CG42674	CG42348,CG32223,CG7323,CG13811,CG13812	NA	5	1	NA	1	0	0	0	0	1	0
4	153192	153198	7	FBgn0052006	FBtr0089170	CG32006	C;C	C	C	0.651555	0.013359	CG32006	Dmel	FBgn0052006	CG32006		NA	NA	1	NA	NA	0	0	1	0	0	0
2R	22885547	22885553	7	FBgn0034792	FBtr0304924	YME1L	C;C	C	C	0.534039	0.0268332	YME1L	Dmel	FBgn0034792	CG3499		NA	NA	1	NA	NA	0	1	0	0	0	0
2R	18409138	18409144	7	FBgn0063491	FBtr0086677	GstE9	C;C	C	C	0.534039	0.037452	GstE9	Dmel	FBgn0063491	CG17534		NA	NA	1	NA	NA	0	0	0	0	0	0
3L	23015545	23015551	7	FBgn0262509	FBtr0304831	nrm	C;C	C	C	0.534039	0.0317638	nrm	Dmel	FBgn0262509	CG43079	CG8779,CG41452,CG32458	NA	NA	1	NA	NA	0	1	0	0	0	0
3R	10861971	10861977	7	FBgn0037846	FBtr0082297	CG6574	C;C	C	C	0.534039	0.00954681	CG6574	Dmel	FBgn0037846	CG6574		NA	NA	1	NA	NA	0	1	0	0	0	0
3R	22072944	22072950	7	FBgn0264491	FBtr0100514	how	C;C	C	C	1	0.104286	how	Dmel	FBgn0264491	CG10293		NA	NA	1	NA	NA	1	0	0	0	1	0
X	15750668	15750674	7	FBgn0030683	FBtr0074087	CG8239	C;C	C	C	1	0.0153924	Mvd	Dmel	FBgn0030683	CG8239		NA	NA	1	NA	NA	0	0	0	0	1	0
3L	6489011	6489017	7	FBgn0035703	FBtr0303036	CG8270	C;C	C	C	0.651555	0.0582449	Bulli	Dmel	FBgn0035703	CG8270		NA	NA	1	NA	NA	0	0	0	0	0	0
3R	26693068	26693074	7	FBgn0039448	FBtr0085049	TwdlQ	C;C	C	C	0.534039	0.000939677	TwdlQ	Dmel	FBgn0039448	CG14250		NA	NA	1	NA	NA	0	0	0	0	0	0
3R	22715857	22715863	7	FBgn0051151	FBtr0110835	wge	C;C	C	C	1	0.0327789	wge	Dmel	FBgn0051151	CG31151	CG4902,CG17621	NA	NA	1	NA	NA	0	0	0	0	0	0
2R	22391347	22391353	7	FBgn0034723	FBtr0071822	CG13506	C;C	C	C	1	0.00413997	CG13506	Dmel	FBgn0034723	CG13506		NA	NA	1	NA	NA	0	0	0	0	1	0
3R	5175779	5175785	7	FBgn0259212	FBtr0299709	cno	C;C	C	C	0.534039	0.00630752	cno	Dmel	FBgn0259212	CG42312	CG31537,CG2534	3	NA	1	1	NA	0	0	0	0	0	0
2R	17857169	17857175	7	FBgn0041585	FBtr0114614	olf186-F	C;C	C	C	1	0.00926117	Orai	Dmel	FBgn0041585	CG11430		NA	NA	1	NA	NA	0	1	0	0	1	0
2R	11245450	11245456	7	FBgn0085254	FBtr0112418	CG34225	C;C	C	C	0.534039	0.0105759	CG34225	Dmel	FBgn0085254	CG34225		NA	NA	1	NA	NA	0	0	0	0	0	0
3L	17360696	17360702	7	FBgn0015550	FBtr0075216	tap	C;C	C	C	0.534039	0.000638617	tap	Dmel	FBgn0015550	CG7659		NA	NA	1	NA	NA	0	0	1	0	0	0
3R	8952874	8952880	7	FBgn0037645	FBtr0334329	CG11966	C;C	C	C	1	0.125612	ich	Dmel	FBgn0286204	CG11966		NA	NA	1	NA	NA	0	0	1	0	0	0
2L	21438396	21438402	7	FBgn0053904	FBtr0091908	His2B:CG33904	C;C	C	C	0.534039	0.0633356	His2B:CG33904	Dmel	FBgn0053904	CG33904		NA	NA	1	NA	NA	0	0	0	0	0	0
2L	835009	835015	7	FBgn0020304	FBtr0302121	drongo	C;C	C	C	0.534039	0.00153043	drongo	Dmel	FBgn0020304	CG3365		NA	5	1	NA	1	0	0	0	0	1	0
2L	12921848	12921854	7	FBgn0040510	FBtr0333225	ACXA	C;C	C	C	0.651555	0.0108906	ACXA	Dmel	FBgn0040510	CG17176		3	NA	1	1	NA	0	1	0	0	0	0
2L	4684746	4684752	7	FBgn0031620	FBtr0343222	CG11929	C;C	C	C	0.651555	0.0123789	CG11929	Dmel	FBgn0031620	CG11929		NA	NA	1	NA	NA	0	0	0	0	0	0
3L	214775	214781	7	FBgn0035111	FBtr0072487	Dis3l2	C;C	C	C	1	0.0406444	Dis3l2	Dmel	FBgn0035111	CG16940		NA	NA	1	NA	NA	0	0	0	0	0	0
3L	14001155	14001161	7	FBgn0036397	FBtr0075786	Nprl3	C;C	C	C	1	0.0104718	Nprl3	Dmel	FBgn0036397	CG8783		NA	NA	1	NA	NA	0	0	0	0	0	0
2R	8521356	8521362	7	FBgn0050361	FBtr0273325	mtt	C;C	C	C	0.534039	0.0585753	mtt	Dmel	FBgn0050361	CG30361	CG8692,CG18447	NA	NA	1	NA	NA	0	1	0	0	0	0
2L	7413477	7413483	7	FBgn0028387	FBtr0308610	chm	C;C	C	C	0.534039	0.0372762	chm	Dmel	FBgn0028387	CG5229		3	NA	1	1	NA	0	0	1	0	0	0
2R	17862346	17862352	7	FBgn0003701	FBtr0340283	thr	C;C	C	C	1	0.011906	thr	Dmel	FBgn0003701	CG5785		NA	NA	1	NA	NA	0	0	0	0	1	0
X	2605629	2605635	7	FBgn0004643	FBtr0070441	Zw10	C;C	C	C	0.651555	0.144514	Zw10	Dmel	FBgn0004643	CG9900		NA	NA	1	NA	NA	0	0	0	0	0	0
3R	6320933	6320939	7	FBgn0037427	FBtr0334538	Osi17	C;C	C	C	1	0.0861886	Osi17	Dmel	FBgn0037427	CG15598		NA	NA	1	NA	NA	0	1	0	0	0	0
3L	6628915	6628921	7	FBgn0004619	FBtr0076982	GluRIA	C;C	C	C	0.534039	0.0205342	GluRIA	Dmel	FBgn0004619	CG8442		NA	NA	1	NA	NA	0	1	0	0	0	0
3R	29146155	29146161	7	FBgn0039641	FBtr0085412	CG14511	C;C	C	C	0.651555	0.0412606	CG14511	Dmel	FBgn0039641	CG14511		NA	NA	1	NA	NA	0	1	0	0	0	0
2R	7005543	7005549	7	FBgn0050160	FBtr0086178	CG30160	C;C	C	C	1	0.0673118	CG30160	Dmel	FBgn0050160	CG30160		NA	NA	1	NA	NA	0	1	0	0	0	0
3L	14073336	14073342	7	FBgn0013563	FBtr0075777	Pex1	C;C	C	C	1	0.0180135	Pex1	Dmel	FBgn0013563	CG6760		NA	NA	1	NA	NA	0	0	0	0	0	1
3R	7251857	7251863	7	FBgn0011282	FBtr0300016	Obp84a	C;C	C	C	1	0.0590613	Obp84a	Dmel	FBgn0011282	CG1176		NA	NA	1	NA	NA	0	0	0	0	0	0
3R	29813958	29813964	7	FBgn0000247	FBtr0346613	ca	C;C	C	C	1	0.0044853	ca	Dmel	FBgn0000247	CG31037	CG18134,CG7799,CG18133	NA	NA	1	NA	NA	0	0	0	0	0	0
2R	9287790	9287796	7	FBgn0033401	FBtr0088595	CG1968	C;C	C	C	1	0.0229003	Cog6	Dmel	FBgn0033401	CG1968		NA	NA	1	NA	NA	0	0	0	0	0	0
2R	7810381	7810387	7	FBgn0033225	FBtr0088899	CG1550	C;C	C	C	0.534039	0.0266233	TTLL12	Dmel	FBgn0033225	CG1550		NA	NA	1	NA	NA	0	0	0	0	0	0
3R	19715561	19715567	7	FBgn0085315	FBtr0112482	CG34286	C;C	C	C	1	0.03204	CG34286	Dmel	FBgn0085315	CG34286		NA	NA	1	NA	NA	0	0	0	0	0	0
2R	7569441	7569447	7	FBgn0033194	FBtr0088910	Vps13	C;C	C	C	0.651555	0.0324684	Vps13	Dmel	FBgn0033194	CG2093		NA	NA	1	NA	NA	0	0	0	0	0	0
3R	9065406	9065412	7	FBgn0037661	FBtr0081971	Ada	C;C	C	C	1	0.0211037	Ada	Dmel	FBgn0037661	CG11994		NA	NA	1	NA	NA	0	0	0	0	0	0
3L	2233518	2233524	7	FBgn0035317	FBtr0332661	Oseg2	C;C	C	C	0.534039	0.0191037	Oseg2	Dmel	FBgn0035317	CG13809		NA	NA	1	NA	NA	0	0	0	0	0	0
2R	22486143	22486149	7	FBgn0034734	FBtr0071833	CG4554	C;C	C	C	0.651555	0.130795	CG4554	Dmel	FBgn0034734	CG4554		NA	NA	1	NA	NA	0	0	0	0	1	0
2L	8208882	8208888	7	FBgn0031999	FBtr0079589	CG8419	C;C	C	C	1	0.0517798	CG8419	Dmel	FBgn0031999	CG8419		NA	NA	1	NA	NA	0	0	0	0	0	0
2R	9141756	9141762	7	FBgn0265313	FBtr0344468	CG44286	C;C	C	C	0.651555	0.020609	CG44286	Dmel	FBgn0265313	CG44286		NA	NA	1	NA	NA	0	0	0	0	0	0
3L	684055	684061	7	FBgn0035153	FBtr0072610	ebd1	C;C	C	C	0.534039	0.00468803	ebd1	Dmel	FBgn0035153	CG3371		NA	NA	1	NA	NA	0	0	0	0	1	0
3R	17686688	17686694	7	FBgn0051249	FBtr0083483	CG31249	C;C	C	C	0.534039	0.0277377	CG31249	Dmel	FBgn0051249	CG31249	CG7477	NA	5	1	NA	1	0	0	0	0	0	0
2R	7512539	7512545	7	FBgn0025185	FBtr0088980	az2	C;C	C	C	0.534039	0.11678	az2	Dmel	FBgn0025185	CG1605		NA	NA	1	NA	NA	0	0	1	0	0	0
2R	12562399	12562405	7	FBgn0050056	FBtr0087823	CG30056	C;C	C	C	0.534039	0.00324187	CG30056	Dmel	FBgn0050056	CG30056		NA	NA	1	NA	NA	0	0	0	0	0	0
3L	9628528	9628534	7	FBgn0036019	FBtr0076420	Or67b	C;C	C	C	1	0.022027	Or67b	Dmel	FBgn0036019	CG14176		NA	NA	1	NA	NA	0	1	0	0	0	0
3R	17403529	17403535	7	FBgn0085309	FBtr0112476	CG34280	C;C	C	C	1	0.000959362	CG34280	Dmel	FBgn0085309	CG34280		NA	NA	1	NA	NA	0	0	0	0	0	0
2R	17124077	17124083	7	FBgn0034195	FBtr0110777	Spn53F	C;C	C	C	0.534039	0.0737245	Spn53F	Dmel	FBgn0034195	CG10956		NA	NA	1	NA	NA	0	0	0	0	0	0
2L	8072178	8072184	7	FBgn0013531	FBtr0079544	MED20	C;C	C	C	1	0.000797095	MED20	Dmel	FBgn0013531	CG18780	CG18267	NA	NA	1	NA	NA	0	0	0	0	0	0
2R	16556655	16556661	7	FBgn0034135	FBtr0087097	Syn2	C;C	C	C	1	0.00582986	Syn2	Dmel	FBgn0034135	CG4905		NA	NA	1	NA	NA	0	0	0	1	0	0
2L	4386966	4386972	7	FBgn0261976	FBtr0331449	Psf2	C;C	C	C	0.651555	0.0314773	Psf2	Dmel	FBgn0261976	CG18013		NA	NA	1	NA	NA	0	0	0	0	0	0
3R	11652711	11652717	7	FBgn0037926	FBtr0335448	Elp1	C;C	C	C	0.651555	0.0115621	Elp1	Dmel	FBgn0037926	CG10535		NA	NA	1	NA	NA	0	0	0	0	0	0
3L	9862622	9862628	7	FBgn0036053	FBtr0076364	iPLA2-VIA	C;C	C	C	1	0.00315959	iPLA2-VIA	Dmel	FBgn0036053	CG6718		3	NA	1	1	NA	0	0	0	0	0	0
X	10762102	10762108	7	FBgn0052675	FBtr0346377	Tango5	C;C	C	C	0.534039	0.0207747	Tango5	Dmel	FBgn0052675	CG32675	CG1534	NA	5	1	NA	1	0	1	0	0	1	0
3L	8411018	8411024	7	FBgn0265102	FBtr0076663	Oseg1	C;C	C	C	0.651555	0.0184595	Oseg1	Dmel	FBgn0265102	CG7161		NA	NA	1	NA	NA	0	0	0	0	0	0
2R	18978855	18978861	7	FBgn0034411	FBtr0302494	CG18605	C;C	C	C	0.534039	0.0424921	CG18605	Dmel	FBgn0034411	CG18605		NA	NA	1	NA	NA	0	0	0	0	1	0
3R	12323678	12323684	7	FBgn0038012	FBtr0082567	CG10013	C;C	C	C	1	0.0193	CG10013	Dmel	FBgn0038012	CG10013		NA	NA	1	NA	NA	0	0	0	0	1	0
2R	23365573	23365579	7	FBgn0003977	FBtr0072037	vir	C;C	C	C	0.534039	0.022411	vir	Dmel	FBgn0003977	CG3496		NA	NA	1	NA	NA	0	1	0	0	0	0
2L	8865627	8865633	7	FBgn0052988	FBtr0079736	CG32988	C;C	C	C	1	0.0681543	CG32988	Dmel	FBgn0052988	CG32988	CG18663	NA	NA	1	NA	NA	0	1	0	0	0	0
3R	23407092	23407098	7	FBgn0259194	FBtr0299678	Ir94e	C;C	C	C	0.651555	0.0217959	Ir94e	Dmel	FBgn0259194	CG42298	CG17379	NA	NA	1	NA	NA	0	1	0	0	0	0
2L	2254781	2254787	7	FBgn0031406	FBtr0077804	Send1	C;C	C	C	0.651555	0.00823853	Send1	Dmel	FBgn0031406	CG17012		NA	NA	1	NA	NA	0	0	0	0	0	0
2R	11447595	11447601	7	FBgn0260499	FBtr0114575	qvr	C;C	C	C	0.651555	0.0277769	qvr	Dmel	FBgn0260499	CG33472	CG30032	NA	NA	1	NA	NA	0	0	0	0	0	0
3L	12531734	12531740	7	FBgn0036299	FBtr0075966	Tsf2	C;C	C	C	1	0.00471779	Tsf2	Dmel	FBgn0036299	CG10620		NA	NA	1	NA	NA	0	1	0	0	0	0
X	15060679	15060685	7	FBgn0030600	FBtr0346087	hiw	C;C	C	C	0.651555	0.0114577	hiw	Dmel	FBgn0030600	CG32592	CG9049,CG9041	NA	NA	1	NA	NA	0	1	0	0	1	0
3R	17387803	17387809	7	FBgn0262871	FBtr0306209	lute	C;C	C	C	0.534039	0.0114066	lute	Dmel	FBgn0262871	CG43226	CG5319,CG14333	NA	NA	1	NA	NA	0	0	0	0	0	0
4	255667	255673	7	FBgn0259216	FBtr0334407	RhoGAP102A	C;C	C	C	0.534039	0.0281628	RhoGAP102A	Dmel	FBgn0259216	CG42316	CG34013,CG1748	3	NA	1	1	NA	0	0	0	0	1	0
X	16062452	16062458	7	FBgn0030722	FBtr0074260	CG12395	C;C	C	C	0.651555	0.00556502	CG12395	Dmel	FBgn0030722	CG12395		NA	NA	1	NA	NA	0	0	0	0	0	0
2R	13433407	13433413	7	FBgn0050065	FBtr0087663	CG30065	C;C	C	C	0.534039	0.0508132	CG30065	Dmel	FBgn0050065	CG30065		NA	NA	1	NA	NA	0	0	0	0	0	0
X	485894	485900	7	FBgn0029525	FBtr0070094	CG18273	C;C	C	C	1	0.0209909	CG18273	Dmel	FBgn0029525	CG18273	CG13372	NA	NA	1	NA	NA	0	0	0	0	1	0
3L	17028111	17028117	7	FBgn0036689	FBtr0089584	CG7730	C;C	C	C	0.651555	0.0429914	CG7730	Dmel	FBgn0036689	CG7730		NA	NA	1	NA	NA	0	1	0	0	0	0
3L	6172926	6172932	7	FBgn0035688	FBtr0077019	CG10289	C;C	C	C	0.534039	0.0258679	fmt	Dmel	FBgn0035688	CG10289		3	5	1	1	1	0	0	0	0	1	0
2L	12101421	12101427	7	FBgn0029137	FBtr0080362	Patsas	C;C	C	C	0.651555	0.0780437	Patsas	Dmel	FBgn0029137	CG6618		NA	NA	1	NA	NA	0	1	0	0	0	0
2L	8410193	8410199	7	FBgn0014417	FBtr0331991	CG13397	C;C	C	C	1	0.000786227	CG13397	Dmel	FBgn0014417	CG13397		NA	NA	1	NA	NA	0	0	0	0	0	0
3R	21032509	21032515	7	FBgn0013812	FBtr0273236	Dhc93AB	C;C	C	C	0.651555	0.0788887	Dhc93AB	Dmel	FBgn0013812	CG3723		NA	NA	1	NA	NA	0	0	0	0	0	0
2L	12039675	12039681	7	FBgn0032398	FBtr0080308	CG6766	C;C	C	C	0.534039	0.286681	CG6766	Dmel	FBgn0032398	CG6766		NA	NA	1	NA	NA	0	0	0	0	0	0
2L	18296676	18296682	7	FBgn0032677	FBtr0081050	CG5790	C;C	C	C	1	0.000801974	CG5790	Dmel	FBgn0032677	CG5790		NA	NA	1	NA	NA	0	0	0	0	0	0
3R	17662658	17662664	7	FBgn0038532	FBtr0083476	CG14322	C;C	C	C	0.534039	0.00428519	CG14322	Dmel	FBgn0038532	CG14322		3	NA	1	1	NA	0	0	0	0	0	0
2R	9964463	9964469	7	FBgn0033468	FBtr0088440	CG1418	C;C	C	C	0.534039	0.183635	CG1418	Dmel	FBgn0033468	CG1418		NA	NA	1	NA	NA	0	1	0	0	0	0
2L	3704623	3704629	7	FBgn0051778	FBtr0339574	CG31778	C;C	C	C	1	0.0507106	CG31778	Dmel	FBgn0051778	CG31778		NA	NA	1	NA	NA	0	0	0	0	0	0
2R	11311823	11311829	7	FBgn0016047	FBtr0339483	nompA	C;C	C	C	0.651555	0.0553875	nompA	Dmel	FBgn0016047	CG13207		NA	NA	1	NA	NA	0	1	0	0	0	0
2R	10308035	10308041	7	FBgn0028426	FBtr0088360	JhI-1	C;C	C	C	1	0.010415	RNaseZ	Dmel	FBgn0028426	CG3298		NA	NA	1	NA	NA	0	0	0	0	1	0
2R	19880312	19880318	7	FBgn0034477	FBtr0086341	CG13872	C;C	C	C	1	0.0137087	CG13872	Dmel	FBgn0034477	CG13872		NA	NA	1	NA	NA	0	0	0	0	0	0
2R	10896203	10896209	7	FBgn0033569	FBtr0088236	CG12942	C;C	C	C	0.534039	0.00909809	CG12942	Dmel	FBgn0033569	CG12942		NA	NA	1	NA	NA	0	0	1	0	0	0
X	4895808	4895814	7	FBgn0260971	FBtr0345704	CG42594	C;C	C	C	1	0.0490483	CG42594	Dmel	FBgn0260971	CG42594	CG15470,CG32771,CG32770,CG6952	NA	NA	1	NA	NA	0	1	0	0	0	0
2R	19681072	19681078	7	FBgn0040730	FBtr0086482	CG15127	C;C	C	C	1	0.00254509	CG15127	Dmel	FBgn0040730	CG15127	CG18365	NA	NA	1	NA	NA	0	0	0	0	0	0
2R	19278936	19278942	7	FBgn0003254	FBtr0330058	rib	C;C	C	C	0.534039	0.0594763	rib	Dmel	FBgn0003254	CG7230		NA	NA	1	NA	NA	0	0	1	0	0	0
X	12628143	12628149	7	FBgn0030409	FBtr0073674	CG15728	C;C	C	C	0.651555	0.0171179	CG15728	Dmel	FBgn0030409	CG15728		NA	NA	1	NA	NA	0	1	0	0	0	0
3L	12738222	12738228	7	FBgn0014007	FBtr0075913	Ptp69D	C;C	C	C	0.534039	0.00715827	Ptp69D	Dmel	FBgn0014007	CG10975		NA	NA	1	NA	NA	0	1	0	0	0	0
2L	6325966	6325972	7	FBgn0265778	FBtr0300039	PDZ-GEF	C;C	C	C	0.534039	0.0171091	PDZ-GEF	Dmel	FBgn0265778	CG9491		3	NA	1	1	NA	0	0	0	0	0	0
2L	13377062	13377068	7	FBgn0032514	FBtr0080470	CG9302	C;C	C	C	0.534039	0.0192674	CG9302	Dmel	FBgn0032514	CG9302		NA	NA	1	NA	NA	0	0	0	0	0	0
2R	21930163	21930169	7	FBgn0085397	FBtr0112593	Fili	C;C	C	C	1	0.0119719	Fili	Dmel	FBgn0085397	CG34368	CG4054,CG13487,CG4045	NA	NA	1	NA	NA	0	1	0	0	0	0
X	12586780	12586786	7	FBgn0283712	FBtr0073659	LIMK1	C;C	C	C	0.534039	0.0410627	LIMK1	Dmel	FBgn0283712	CG1848		NA	NA	1	NA	NA	0	0	0	0	0	0
X	7.94072e+06	7.94072e+06	7	FBgn0260970	FBtr0301748	Ubr3	C;C	C	C	0.651555	0.089151	Ubr3	Dmel	FBgn0260970	CG42593	CG1531,CG1530	3	NA	1	1	NA	0	1	0	0	1	0
2R	23101532	23101538	7	FBgn0261614	FBtr0302953	CG42703	C;C	C	C	1	0.21609	CG42703	Dmel	FBgn0261614	CG42703		NA	NA	1	NA	NA	0	0	0	0	0	0
3R	6260539	6260545	7	FBgn0037416	FBtr0078599	Osi9	C;C	C	C	0.651555	0.110553	Osi9	Dmel	FBgn0037416	CG15592		3	NA	1	1	NA	0	1	0	0	0	0
2L	4936240	4936246	7	FBgn0031649	FBtr0077394	hoe2	C;C	C	C	1	0.000420527	hoe2	Dmel	FBgn0031649	CG15624		NA	NA	1	NA	NA	0	1	0	0	0	0
3L	16005687	16005693	7	FBgn0036557	FBtr0075519	mRpS31	C;C	C	C	0.534039	0.00919398	mRpS31	Dmel	FBgn0036557	CG5904		NA	NA	1	NA	NA	0	0	0	0	1	0
3R	20967133	20967139	7	FBgn0002921	FBtr0333324	Atpalpha	C;C	C	C	0.534039	0.347354	Atpalpha	Dmel	FBgn0002921	CG5670		NA	NA	1	NA	NA	0	1	0	0	1	0
3R	30008158	30008164	7	FBgn0039736	FBtr0085605	CG7912	C;C	C	C	0.534039	0.00587927	CG7912	Dmel	FBgn0039736	CG7912		NA	NA	1	NA	NA	0	1	0	0	0	0
2L	2066749	2066755	7	FBgn0053516	FBtr0334783	dpr3	C;C	C	C	0.651555	0.0555325	dpr3	Dmel	FBgn0053516	CG33516	CG15380,CG15379,CG15381	NA	NA	1	NA	NA	0	1	0	0	0	0
2L	16245413	16245419	7	FBgn0262000	FBtr0303798	CG42818	C;C	C	C	0.651555	0.0279163	CG42818	Dmel	FBgn0262000	CG42818	CG12455	NA	NA	1	NA	NA	0	0	0	0	0	0
2L	9706725	9706731	7	FBgn0011207	FBtr0079847	pelo	C;C	C	C	0.534039	0.00444205	pelo	Dmel	FBgn0011207	CG3959		NA	NA	1	NA	NA	0	0	0	0	0	0
X	18725815	18725821	7	FBgn0259231	FBtr0299681	CCKLR-17D1	C;C	C	C	1	0.00137733	CCKLR-17D1	Dmel	FBgn0259231	CG42301	CG6857	NA	NA	1	NA	NA	0	1	0	0	0	0
2L	13007673	13007679	7	FBgn0021796	FBtr0080422	Tor	C;C	C	C	0.651555	0.0785552	Tor	Dmel	FBgn0021796	CG5092		3	NA	1	1	NA	0	0	0	0	0	0
3R	13089438	13089444	7	FBgn0085337	FBtr0445441	CG34308	C;C	C	C	1	0.00486022	CG34308	Dmel	FBgn0085337	CG34308		NA	NA	1	NA	NA	0	0	0	0	0	0
Y	352073	352078	7	FBgn0267432	FBtr0346771	kl-3	C;C	C	C	0.651555	0.173178	kl-3	Dmel	FBgn0267432	CG45785	CG40992,CG40936,CG17629,CG40443	NA	NA	1	NA	NA	0	0	0	0	0	0
2R	14162367	14162373	7	FBgn0033901	FBtr0087520	O-fut1	C;C	C	C	1	0.0130025	O-fut1	Dmel	FBgn0033901	CG12366		NA	NA	1	NA	NA	0	0	0	0	0	0
X	8428046	8428052	7	FBgn0261793	FBtr0300577	Trf2	C;C	C	C	0.534039	0.181175	Trf2	Dmel	FBgn0261793	CG18009	CG11195	NA	NA	1	NA	NA	0	0	0	0	1	0
3R	14080895	14080901	7	FBgn0038197	FBtr0082886	foxo	C;C	C	C	1	0.00955649	foxo	Dmel	FBgn0038197	CG3143		NA	NA	1	NA	NA	0	0	1	0	0	0
2R	20258419	20258425	7	FBgn0034491	FBtr0086272	Hsl	C;C	C	C	1	0.00821924	Hsl	Dmel	FBgn0034491	CG11055		NA	NA	1	NA	NA	0	0	0	0	0	0
X	6527470	6527476	7	FBgn0029874	FBtr0070918	CG3342	C;C	C	C	1	0.0087196	CG3342	Dmel	FBgn0029874	CG3342		NA	NA	1	NA	NA	0	0	0	0	0	0
2L	21508069	21508075	7	FBgn0053880	FBtr0091884	His2B:CG33880	C;C	C	C	0.534039	0.0633356	His2B:CG33880	Dmel	FBgn0053880	CG33880		NA	NA	1	NA	NA	0	0	0	0	0	0
3R	15546826	15546832	7	FBgn0038349	FBtr0083151	AOX3	C;C	C	C	0.534039	0.0446589	AOX3	Dmel	FBgn0038349	CG6045		NA	NA	1	NA	NA	0	0	0	0	0	0
3L	12783848	12783854	7	FBgn0036311	FBtr0075923	CG17666	C;C	C	C	1	0.00402966	CG17666	Dmel	FBgn0036311	CG17666		NA	NA	1	NA	NA	0	0	0	0	0	0
X	7331669	7331675	7	FBgn0261848	FBtr0303416	CG42780	C;C	C	C	0.534039	0.0557633	CG42780	Dmel	FBgn0261848	CG42780		NA	NA	1	NA	NA	0	0	0	0	0	0
X	6826909	6826915	7	FBgn0263968	FBtr0070972	nonC	C;C	C	C	1	0.0229715	nonC	Dmel	FBgn0263968	CG32743	CG4555,CG4549	NA	NA	1	NA	NA	0	0	0	0	0	0
3R	16017347	16017353	7	FBgn0038391	FBtr0303260	GATAe	C;C	C	C	1	0.00507619	GATAe	Dmel	FBgn0038391	CG10278		NA	NA	1	NA	NA	0	0	1	0	0	0
3L	18663592	18663598	7	FBgn0036801	FBtr0075049	MYPT-75D	C;C	C	C	1	0.0125484	MYPT-75D	Dmel	FBgn0036801	CG6896		NA	5	1	NA	1	0	0	0	0	0	0
2R	14069767	14069773	7	FBgn0040752	FBtr0339764	Prosap	C;C	C	C	0.651555	0.0717212	Prosap	Dmel	FBgn0040752	CG30483	CG8122,CG13354	3	NA	1	1	NA	0	0	0	0	0	0
2L	10513400	10513406	7	FBgn0267828	FBtr0347406	Fatp	C;C	C	C	0.534039	0.0684014	Fatp1	Dmel	FBgn0267828	CG46149	CG7400,CG45083	3	NA	1	1	NA	0	1	0	0	0	0
3L	17510498	17510504	7	FBgn0036732	FBtr0302041	Oatp74D	C;C	C	C	0.534039	0.00187614	Oatp74D	Dmel	FBgn0036732	CG7571		3	NA	1	1	NA	0	1	0	0	0	0
3L	8202152	8202158	7	FBgn0035855	FBtr0076721	CG7366	C;C	C	C	1	0.00698292	CG7366	Dmel	FBgn0035855	CG7366		NA	NA	1	NA	NA	0	0	0	0	0	0
3L	7074928	7074934	7	FBgn0054030	FBtr0100085	CG34030	C;C	C	C	1	0.000475891	CG34030	Dmel	FBgn0054030	CG34030		NA	NA	1	NA	NA	0	1	0	0	0	0
3L	17240333	17240339	7	FBgn0036702	FBtr0075251	CG6512	C;C	C	C	0.534039	0.0050063	Afg3l2	Dmel	FBgn0036702	CG6512		NA	NA	1	NA	NA	0	1	0	0	1	0
X	15719897	15719903	7	FBgn0030674	FBtr0074082	CG8184	C;C	C	C	0.651555	0.0689844	HUWE1	Dmel	FBgn0030674	CG8184		NA	NA	1	NA	NA	0	0	0	0	0	0
2L	21157974	21157980	7	FBgn0032922	FBtr0301238	CG9249	C;C	C	C	0.534039	0.00186229	Coq3	Dmel	FBgn0032922	CG9249		NA	NA	1	NA	NA	0	0	0	0	1	0
3R	27935181	27935187	7	FBgn0039559	FBtr0335014	NSD	C;C	C	C	1	0.0105413	NSD	Dmel	FBgn0039559	CG4976		NA	NA	1	NA	NA	0	0	0	0	0	0
2R	23372949	23372955	7	FBgn0034854	FBtr0072036	Golgin245	C;C	C	C	0.534039	0.0203183	Golgin245	Dmel	FBgn0034854	CG3493		NA	NA	1	NA	NA	0	0	0	0	0	0
3R	19404007	19404013	7	FBgn0038704	FBtr0083758	CG5316	C;C	C	C	0.534039	0.711291	CG5316	Dmel	FBgn0038704	CG5316		NA	5	1	NA	1	1	0	0	0	1	0
3R	19214222	19214228	7	FBgn0025680	FBtr0083736	cry	C;C	C	C	0.534039	0.0291889	cry	Dmel	FBgn0025680	CG3772		NA	NA	1	NA	NA	0	0	0	0	1	0
3R	15361570	15361576	7	FBgn0026634	FBtr0083114	ldlCp	C;C	C	C	0.651555	0.303339	Cog2	Dmel	FBgn0026634	CG6177		NA	NA	1	NA	NA	0	0	0	0	1	0
3R	29805628	29805634	7	FBgn0002924	FBtr0085534	ncd	C;C	C	C	0.534039	0.000974852	ncd	Dmel	FBgn0002924	CG7831		NA	NA	1	NA	NA	0	0	0	0	0	0
2L	1184621	1184627	7	FBgn0031321	FBtr0077971	Tgt	C;C	C	C	1	0.00872373	Tgt	Dmel	FBgn0031321	CG4947		NA	NA	1	NA	NA	0	0	0	0	0	0
2L	18538119	18538125	7	FBgn0085370	FBtr0112545	Pde11	C;C	C	C	1	0.0196315	Pde11	Dmel	FBgn0085370	CG34341	CG10231,CG15159	NA	NA	1	NA	NA	0	0	0	0	1	0
X	11881331	11881337	7	FBgn0030349	FBtr0308070	CG10353	C;C	C	C	0.651555	0.112502	CG10353	Dmel	FBgn0030349	CG10353		NA	NA	1	NA	NA	0	1	0	0	0	0
2R	23686640	23686646	7	FBgn0265052	FBtr0336680	St3	C;C	C	C	1	0.00596095	St3	Dmel	FBgn0265052	CG44167	CG5431,CG11293	NA	NA	1	NA	NA	0	1	0	0	0	0
Y	2486696	2486702	7	FBgn0267449	FBtr0347028	WDY	C;C	C	C	1	0.0288679	WDY	Dmel	FBgn0267449	CG45799	CG40449,CG41020,CG40551,CG40245,CG40583	NA	NA	1	NA	NA	0	0	0	0	0	0
2R	23046688	23046694	7	FBgn0003900	FBtr0345653	twi	C;C	C	C	0.534039	0.0363077	twi	Dmel	FBgn0003900	CG2956		NA	NA	1	NA	NA	0	0	1	0	1	0
2R	23103507	23103513	7	FBgn0041235	FBtr0071977	Gr59c	C;C	C	C	0.651555	0.00333061	Gr59c	Dmel	FBgn0041235	CG30186	CG13543	NA	NA	1	NA	NA	0	1	0	0	0	0
2R	24951312	24951318	7	FBgn0035086	FBtr0345514	CG12851	C;C	C	C	1	0.0194902	CG12851	Dmel	FBgn0035086	CG12851		NA	NA	1	NA	NA	0	0	0	0	0	0
3R	30477393	30477399	7	FBgn0260440	FBtr0085651	spdo	C;C	C	C	0.534039	0.00410324	spdo	Dmel	FBgn0260440	CG31020		NA	NA	1	NA	NA	0	1	0	0	0	0
3R	25026700	25026706	7	FBgn0015240	FBtr0084756	Hr96	C;C	C	C	0.534039	0.0440576	Hr96	Dmel	FBgn0015240	CG11783		NA	NA	1	NA	NA	0	0	1	0	0	0
2R	12314995	12315001	7	FBgn0050046	FBtr0087895	CG30046	C;C	C	C	1	0.0377008	CG30046	Dmel	FBgn0050046	CG30046	CG17740	NA	NA	1	NA	NA	0	0	0	0	0	0
X	15981488	15981494	7	FBgn0030716	FBtr0346191	CG9170	C;C	C	C	0.534039	0.505489	CG9170	Dmel	FBgn0030716	CG9170		NA	5	1	NA	1	0	0	0	0	0	0
X	5709148	5709154	7	FBgn0053080	FBtr0070845	CG33080	C;C	C	C	1	0.0731039	CG33080	Dmel	FBgn0053080	CG33080	CG3141,CG15775,CG15774	NA	NA	1	NA	NA	0	1	0	0	1	0
4	117693	117699	7	FBgn0011747	FBtr0089173	Ank	C;C	C	C	0.651555	0.0224106	Ank	Dmel	FBgn0011747	CG1651	CG32008	3	NA	1	1	NA	0	0	0	0	0	0
3L	8417350	8417356	7	FBgn0052354	FBtr0076662	CG32354	C;C	C	C	1	0.00214085	CG32354	Dmel	FBgn0052354	CG32354	CG17355,CG7159,CG7027	NA	NA	1	NA	NA	0	1	0	0	0	0
3R	23536250	23536256	7	FBgn0039086	FBtr0303507	CG16732	C;C	C	C	0.651555	0.0521422	Ugt303B1	Dmel	FBgn0039086	CG16732		NA	NA	1	NA	NA	0	1	0	0	0	0
X	14906684	14906690	7	FBgn0030594	FBtr0343380	CG9509	C;C	C	C	1	0.00838981	fiz	Dmel	FBgn0030594	CG9509		NA	NA	1	NA	NA	0	0	0	0	0	0
2R	17755597	17755603	7	FBgn0034276	FBtr0089560	Sardh	C;C	C	C	0.534039	0.0550035	Sardh	Dmel	FBgn0034276	CG6385		NA	NA	1	NA	NA	0	1	0	0	0	0
2L	13199962	13199968	7	FBgn0032481	FBtr0080488	CG16972	C;C	C	C	0.534039	0.0159889	CG16972	Dmel	FBgn0032481	CG16972		NA	NA	1	NA	NA	0	0	0	0	0	0
2L	21482730	21482736	7	FBgn0053890	FBtr0091894	His2B:CG33890	C;C	C	C	0.534039	0.0633356	His2B:CG33890	Dmel	FBgn0053890	CG33890		NA	NA	1	NA	NA	0	0	0	0	0	0
3R	23587643	23587649	7	FBgn0039091	FBtr0084486	CG10182	C;C	C	C	0.651555	0.0290312	CG10182	Dmel	FBgn0039091	CG10182		NA	NA	1	NA	NA	0	1	0	0	0	0
3L	9014611	9014617	7	FBgn0035956	FBtr0076547	Doc2	C;C	C	C	0.534039	0.161385	Doc2	Dmel	FBgn0035956	CG5187		NA	NA	1	NA	NA	0	0	1	0	0	0
3L	8434964	8434970	7	FBgn0263352	FBtr0345595	Unr	C;C	C	C	0.534039	0.0140263	Unr	Dmel	FBgn0263352	CG7015	CR32028	NA	NA	1	NA	NA	1	0	1	0	0	0
2L	8160225	8160231	7	FBgn0261064	FBtr0079581	Rbsn-5	C;C	C	C	0.534039	0.0398779	Rbsn-5	Dmel	FBgn0261064	CG8506		NA	NA	1	NA	NA	0	0	1	0	0	0
2R	21483352	21483358	7	FBgn0026369	FBtr0071641	Sara	C;C	C	C	0.534039	0.00550469	Sara	Dmel	FBgn0026369	CG15667		NA	NA	1	NA	NA	0	0	0	0	0	0
2R	8732297	8732303	7	FBgn0086784	FBtr0301639	stmA	C;C	C	C	0.534039	0.0410276	stmA	Dmel	FBgn0086784	CG8739		NA	NA	1	NA	NA	0	1	0	0	0	0
2L	15614281	15614287	7	FBgn0028949	FBtr0343718	CG15254	C;C	C	C	1	0.054065	CG15254	Dmel	FBgn0028949	CG15254		NA	NA	1	NA	NA	0	0	0	0	0	0
2L	8435285	8435291	7	FBgn0027490	FBtr0079707	D12	C;C	C	C	1	0.00164326	D12	Dmel	FBgn0027490	CG13400		NA	NA	1	NA	NA	0	0	0	0	0	0
2R	1.03119e+07	1.03119e+07	7	FBgn0033508	FBtr0088359	Obp46a	C;C	C	C	0.651555	0.117333	Obp46a	Dmel	FBgn0033508	CG12905		NA	NA	1	NA	NA	0	0	0	0	0	0
3L	3839615	3839621	7	FBgn0004875	FBtr0333210	enc	C;C	C	C	1	0.0268822	enc	Dmel	FBgn0004875	CG10847		3	NA	1	1	NA	0	0	0	0	0	0
3L	19979553	19979559	7	FBgn0036922	FBtr0346534	CG14182	C;C	C	C	0.651555	0.173992	CG14182	Dmel	FBgn0036922	CG14182		NA	NA	1	NA	NA	0	1	0	0	0	0
X	18459565	18459571	7	FBgn0264395	FBtr0332419	CG43843	C;C	C	C	0.651555	0.0118854	CG43843	Dmel	FBgn0264395	CG43843	CG15049	NA	NA	1	NA	NA	0	0	0	0	0	0
2R	11387890	11387896	7	FBgn0050022	FBtr0289990	CG30022	C;C	C	C	1	0.0125843	CG30022	Dmel	FBgn0050022	CG30022	CG9026	NA	NA	1	NA	NA	0	0	0	0	0	0
3L	20439309	20439315	7	FBgn0036992	FBtr0078225	CG11796	C;C	C	C	0.534039	0.0848806	Hpd	Dmel	FBgn0036992	CG11796		NA	5	1	NA	1	0	0	0	0	0	0
3L	1293848	1293854	7	FBgn0052333	FBtr0072662	CG32333	C;C	C	C	1	0.00377175	CG32333	Dmel	FBgn0052333	CG32333	CG9146,CG9137	NA	NA	1	NA	NA	0	0	0	0	0	0
3L	13438185	13438191	7	FBgn0036362	FBtr0089323	CG10725	C;C	C	C	0.651555	0.014829	CG10725	Dmel	FBgn0036362	CG10725		NA	NA	1	NA	NA	0	0	0	0	0	0
2R	22670176	22670182	7	FBgn0040658	FBtr0343011	CG13516	C;C	C	C	0.651555	0.116791	CG13516	Dmel	FBgn0040658	CG13516		NA	NA	1	NA	NA	0	1	0	0	0	0
X	19269272	19269278	7	FBgn0040068	FBtr0113316	Vav	C;C	C	C	1	0.0714643	Vav	Dmel	FBgn0040068	CG7893		NA	NA	1	NA	NA	0	0	0	0	0	0
2R	23143780	23143786	7	FBgn0034827	FBtr0071968	Klp59D	C;C	C	C	0.651555	0.0950197	Klp59D	Dmel	FBgn0034827	CG12192		NA	NA	1	NA	NA	0	0	0	0	0	0
3R	7899945	7899951	7	FBgn0260005	FBtr0339709	wtrw	C;C	C	C	1	0.0494368	wtrw	Dmel	FBgn0260005	CG31284	CG17817,CG10409	NA	NA	1	NA	NA	0	1	0	0	0	0
X	13782997	13783003	7	FBgn0030522	FBtr0100218	CG11103	C;C	C	C	0.534039	0.0528807	CG11103	Dmel	FBgn0030522	CG11103		NA	NA	1	NA	NA	0	1	0	0	0	0
3R	23487888	23487894	7	FBgn0039080	FBtr0273205	Ir94h	C;C	C	C	0.534039	0.0352529	Ir94h	Dmel	FBgn0039080	CG17382		NA	NA	1	NA	NA	0	1	0	0	0	0
3R	20290119	20290125	7	FBgn0262582	FBtr0334305	cic	C;C	C	C	0.534039	0.0415771	cic	Dmel	FBgn0262582	CG43122	CG5067,CG5060	NA	NA	1	NA	NA	0	0	1	0	0	0
3L	1242612	1242618	7	FBgn0004378	FBtr0072733	Klp61F	C;C	C	C	0.534039	0.00147175	Klp61F	Dmel	FBgn0004378	CG9191		NA	NA	1	NA	NA	0	0	0	0	0	0
X	12328586	12328592	7	FBgn0267001	FBtr0346335	Ten-a	C;C	C	C	0.534039	0.0354043	Ten-a	Dmel	FBgn0267001	CG42338	CG32659,CG12720,CG15733,CG2578,CG18182,CG2590,CG11270	NA	5	1	NA	1	0	1	0	0	1	0
2R	19401284	19401290	7	FBgn0263391	FBtr0309111	hts	C;C	C	C	0.651555	0.00137806	hts	Dmel	FBgn0263391	CG43443	CG9325,CG34197	NA	NA	1	NA	NA	0	0	0	1	1	0
2R	22181744	22181750	7	FBgn0034706	FBtr0071769	CG11275	C;C	C	C	0.651555	0.00248442	CG11275	Dmel	FBgn0034706	CG11275		NA	NA	1	NA	NA	0	0	0	0	0	0
3L	16288028	16288034	7	FBgn0036595	FBtr0289963	CG13046	C;C	C	C	0.534039	0.0746718	CG13046	Dmel	FBgn0036595	CG13046		NA	NA	1	NA	NA	0	0	0	0	0	0
3R	14617370	14617376	7	FBgn0038246	FBtr0334028	CG14853	C;C	C	C	1	0.061835	CG14853	Dmel	FBgn0038246	CG14853		NA	NA	1	NA	NA	0	0	0	0	0	0
3R	30491753	30491759	7	FBgn0039779	FBtr0085653	PH4alphaSG2	C;C	C	C	1	0.00877016	PH4alphaSG2	Dmel	FBgn0039779	CG1546		NA	NA	1	NA	NA	0	0	0	0	0	0
3R	6458101	6458107	7	FBgn0037446	FBtr0302383	Zif	C;C	C	C	1	0.0166153	Zif	Dmel	FBgn0037446	CG10267		NA	NA	1	NA	NA	0	0	1	0	1	0
3R	25921448	25921454	7	FBgn0039395	FBtr0084984	CG14546	C;C	C	C	0.534039	0.043597	CG14546	Dmel	FBgn0039395	CG14546		NA	NA	1	NA	NA	0	0	0	0	0	0
3R	24145230	24145236	7	FBgn0039155	FBtr0084549	Kal1	C;C	C	C	0.534039	0.02505	Kal1	Dmel	FBgn0039155	CG6173		NA	NA	1	NA	NA	0	0	0	0	0	0
2L	3110257	3110263	7	FBgn0005779	FBtr0077660	PpD6	C;C	C	C	1	0.242876	PpD6	Dmel	FBgn0005779	CG8822		NA	NA	1	NA	NA	0	0	0	0	0	0
X	7012955	7012961	7	FBgn0029928	FBtr0071032	CG3032	C;C	C	C	1	0.00134734	CG3032	Dmel	FBgn0029928	CG3032		NA	NA	1	NA	NA	0	0	1	0	0	0
3L	11027990	11027996	7	FBgn0052081	FBtr0076198	CG32081	C;C	C	C	0.651555	0.0515875	CG32081	Dmel	FBgn0052081	CG32081	CG11806	NA	NA	1	NA	NA	0	1	0	0	0	0
3R	24925869	24925875	7	FBgn0039251	FBtr0084718	Trf4-2	C;C	C	C	0.651555	0.00992708	Trf4-2	Dmel	FBgn0039251	CG17462		NA	NA	1	NA	NA	0	0	0	0	1	0
2L	3047060	3047066	7	FBgn0042627	FBtr0077657	FASN2	C;C	C	C	1	0.00797136	FASN2	Dmel	FBgn0042627	CG3524		NA	NA	1	NA	NA	0	0	0	0	0	0
2R	13943101	13943107	7	FBgn0033885	FBtr0087615	DJ-1alpha	C;C	C	C	0.651555	0.0101474	DJ-1alpha	Dmel	FBgn0033885	CG6646		NA	NA	1	NA	NA	0	0	0	0	0	0
2R	2830746	2830752	7	FBgn0085638	FBtr0334937	CG41378	C;C	C	C	0.651555	0.0706796	CG41378	Dmel	FBgn0085638	CG41378		NA	NA	1	NA	NA	0	0	0	0	0	0
2L	8402236	8402242	7	FBgn0001084	FBtr0331992	fy	C;C	C	C	1	0.00404264	fy	Dmel	FBgn0001084	CG13396		NA	NA	1	NA	NA	0	1	0	0	0	0
2R	17507791	17507797	7	FBgn0283508	FBtr0305703	nw	C;C	C	C	0.534039	0.00276998	nw	Dmel	FBgn0283508	CG43164	CG18431,CG33006,CG4844	3	NA	1	1	NA	0	0	0	0	0	0
2L	4226145	4226151	7	FBgn0031590	FBtr0077477	CG3702	C;C	C	C	0.534039	0.0892314	CG3702	Dmel	FBgn0031590	CG3702		NA	NA	1	NA	NA	0	1	0	0	0	0
2R	14056924	14056930	7	FBgn0002643	FBtr0087596	mam	C;C	C	C	0.534039	0.032238	mam	Dmel	FBgn0002643	CG8118		NA	5	1	NA	1	0	0	0	0	0	0
2L	4447248	4447254	7	FBgn0025684	FBtr0077456	MFS18	C;C	C	C	0.651555	0.0164774	MFS18	Dmel	FBgn0025684	CG15438		NA	NA	1	NA	NA	0	1	0	0	1	0
3R	12061939	12061945	7	FBgn0037988	FBtr0082552	CG14740	C;C	C	C	1	0.044163	CG14740	Dmel	FBgn0037988	CG14740		NA	NA	1	NA	NA	0	0	0	0	0	0
3R	9060228	9060234	7	FBgn0037659	FBtr0336759	Kdm2	C;C	C	C	0.651555	0.0229356	Kdm2	Dmel	FBgn0037659	CG11033		3	NA	1	1	NA	0	0	1	0	0	0
2R	21679573	21679579	7	FBgn0050263	FBtr0273308	stum	C;C	C	C	0.534039	0.0133857	stum	Dmel	FBgn0050263	CG30263	CG15679,CG15677	NA	5	1	NA	1	0	1	0	0	0	0
3R	24317139	24317145	7	FBgn0028471	FBtr0084633	Nab2	C;C	C	C	0.651555	0.00658102	Nab2	Dmel	FBgn0028471	CG5720		NA	NA	1	NA	NA	1	0	0	0	0	0
3R	14251939	14251945	7	FBgn0027083	FBtr0337021	MetRS-m	C;C	C	C	1	0.0511027	MetRS-m	Dmel	FBgn0027083	CG31322	CG9612,CG8684	NA	NA	1	NA	NA	0	0	0	0	0	0
3R	16455035	16455041	7	FBgn0038431	FBtr0110773	CG10405	C;C	C	C	0.534039	0.106102	CG10405	Dmel	FBgn0038431	CG10405		NA	NA	1	NA	NA	0	0	0	0	0	0
2L	6336792	6336798	7	FBgn0031799	FBtr0079284	Pez	C;C	C	C	0.534039	0.0232896	Pez	Dmel	FBgn0031799	CG9493		NA	NA	1	NA	NA	0	0	0	0	1	0
X	1926748	1926754	7	FBgn0023508	FBtr0070317	Ocrl	C;C	C	C	0.534039	0.00166812	Ocrl	Dmel	FBgn0023508	CG3573		NA	NA	1	NA	NA	0	1	0	0	0	0
3L	7330129	7330135	7	FBgn0002909	FBtr0076839	mus312	C;C	C	C	0.651555	0.0943764	mus312	Dmel	FBgn0002909	CG8601		NA	NA	1	NA	NA	0	0	0	0	0	0
2L	5324286	5324292	7	FBgn0031698	FBtr0329969	Ncoa6	C;C	C	C	0.534039	0.0183029	Ncoa6	Dmel	FBgn0031698	CG14023	CG1402	NA	NA	1	NA	NA	0	1	0	0	0	0
3R	9564614	9564620	7	FBgn0261049	FBtr0082070	Vps45	C;C	C	C	0.534039	0.00245338	Vps45	Dmel	FBgn0261049	CG8228		NA	NA	1	NA	NA	0	0	0	0	0	0
X	2696053	2696059	7	FBgn0024992	FBtr0345716	CG2658	C;C	C	C	1	0.104561	Spg7	Dmel	FBgn0024992	CG2658		NA	NA	1	NA	NA	0	1	0	0	0	0
2R	23458326	23458332	7	FBgn0034863	FBtr0072022	SkpF	C;C	C	C	0.651555	0.263365	SkpF	Dmel	FBgn0034863	CG12227		NA	NA	1	NA	NA	0	0	0	0	0	0
3R	25276665	25276671	7	FBgn0039311	FBtr0114505	CG10513	C;C	C	C	1	0.516708	CG10513	Dmel	FBgn0039311	CG10513		NA	NA	1	NA	NA	0	0	0	0	0	0
2L	8931787	8931793	7	FBgn0085427	FBtr0340260	CG34398	C;C	C	C	0.534039	0.00868277	CG34398	Dmel	FBgn0085427	CG34398	CG9487,CG15867	NA	NA	1	NA	NA	0	0	0	0	0	0
3L	10983602	10983608	7	FBgn0013469	FBtr0333361	klu	C;C	C	C	1	0.0284647	klu	Dmel	FBgn0013469	CG12296		NA	NA	1	NA	NA	0	0	1	0	0	0
3L	16785606	16785612	7	FBgn0025582	FBtr0075345	eIF3e	C;C	C	C	0.534039	0.0133911	eIF3e	Dmel	FBgn0025582	CG9677		NA	NA	1	NA	NA	1	0	0	0	1	0
3L	584613	584619	7	FBgn0035144	FBtr0072563	Kah	C;C	C	C	0.651555	0.070041	Kah	Dmel	FBgn0035144	CG17181		NA	NA	1	NA	NA	0	0	1	0	1	0
3R	24750568	24750574	7	FBgn0003719	FBtr0084691	tld	C;C	C	C	1	0.0908287	tld	Dmel	FBgn0003719	CG6868		NA	NA	1	NA	NA	0	0	0	0	0	0
3L	208751	208757	7	FBgn0027587	FBtr0344840	CG7028	C;C	C	C	1	0.0124827	Prp4k	Dmel	FBgn0027587	CG7028		NA	NA	1	NA	NA	0	0	0	0	1	0
3L	15717302	15717308	7	FBgn0260777	FBtr0331799	CG42571	C;C	C	C	1	0.0241446	CG42571	Dmel	FBgn0260777	CG42571		NA	NA	1	NA	NA	0	1	0	0	0	0
2L	5976623	5976629	7	FBgn0000308	FBtr0079235	chic	C;C	C	C	0.651555	0.0272696	chic	Dmel	FBgn0000308	CG9553		NA	NA	1	NA	NA	0	0	0	1	1	0
X	15685155	15685161	7	FBgn0030667	FBtr0347265	CG15599	C;C	C	C	0.534039	0.00175745	CG15599	Dmel	FBgn0030667	CG15599		NA	NA	1	NA	NA	0	0	0	0	0	0
2R	19503325	19503331	7	FBgn0034455	FBtr0086464	CG11007	C;C	C	C	0.534039	0.00317264	CG11007	Dmel	FBgn0034455	CG11007		NA	NA	1	NA	NA	0	1	0	0	0	0
2L	20657350	20657356	7	FBgn0032873	FBtr0339520	CG2614	C;C	C	C	1	0.028213	CG2614	Dmel	FBgn0032873	CG2614		NA	NA	1	NA	NA	0	0	0	0	0	0
3R	25341154	25341160	7	FBgn0027376	FBtr0084832	rha	C;C	C	C	0.534039	0.103582	rha	Dmel	FBgn0027376	CG11908		NA	NA	1	NA	NA	0	0	0	0	0	0
[truncated: 2,278 more rows]

## Sheet: raw_pwmscan_dm6_Rbfox1
chromosome	start	end	bindingsitelengths	orientation	species	bindingsite_sequence	transcript_length	pvalue
[truncated: 110,081 more rows]

[truncated: 2 more sheets: PWMScan_genelists, raw_oRNAment_Bru1]
