# Supplementary material for: Rbfox1 is required for myofibril development and maintaining fiber type–specific isoform expression in Drosophila muscles
Source: Life Sci Alliance. 2022 Jan 7;5(4):e202101342. doi: 10.26508/lsa.202101342 (PMC8742874; doi:10.26508/lsa.202101342)
Supplement: Supplementary file 10 [file LSA-2021-01342_TableS3.xlsx]

## Sheet: Sheet1
This spreadsheet contains sequences of all primers used in this manuscript for PCR, RT–PCR, RIP, sequencing and cloning purposes.
Primer name	Sequence 5’-3’	Tm	Elongation (in seconds)	cycle no.	Amplicon size (in base pairs)
Act88F–F	TGATCACCATTGGCAACGAG
Act88F–R	CATACGATCGGCAATACCAG	54	30	30	248
TnI Ex 3–F	CAACGACCCCAAAGTGAAGG
TnI Ex 8–R	TTTAGCACAGCGGCATCTTT	60	45	30	551
TnI Ex 7–F	TCGCGGCAAGTTCGTCAAGC	59	30	30	295
TnI Ex 3'UTR–R	TGATTTTGGGCATGGCAAGG
Salm pan RT–F	CGCACAGCAACGATAACTCG	59/60			189
Salm pan RT–R	TGTGGGTTCGGTAGTGCATC
Arrest pan RT–F	TAAAGTGACCCTGAGCCAGA	58	30	36	212
Arrest pan RT–R	GGCCCAGAGGTATGTTGATG
Mef-2 pan RT–F	ATCTGTTGCCATGGGCCGCA	55	30	36	1752
Mef-2 pan RT–R	CTGCTGCTGGTGATGGTGTT
Rbfox1 Pan RT–F	AATATTCAAGTGGCGGCTGT	59	30	36	168
Rbfox1 Pan RT–R	ACTGTGGACTTCTGTTGCAT
Mef2- 5' UTR-F1	TCATTCCGAGCCAACGATCC	65	90	36	885
Mef2- 5' UTR-F2	AACAGAAGCGAGAGCGCCA A	68	90	36	567
Mef2- 5' UTR-F3	TGAAGGAGATCGCCGGTCAA	-
Mef2- 5' UTR–R	TGGTGGTGTCCTTGTGCTCG
RP49 – F	AGATCGTGAAGAAGCGACCA AG
RP49 – R	CACCAGGAACTTCTTGAATC CGG	55	30	30	219
Bru1 Ex 5-F	AACTGGAGTTCGGTCTCGC
Bru1 Ex 7-F	AGCCTGCCGAATAGTCCC	65	60	IFM,TDT, Abd-M: 30, 32, 34	500
Bru1 Ex 8-R	CTTTCAGGGCGGCGTGTC
Bru1 Ex13-F	GGTACCCAAAAAGAGAAGGAGCAG	61	40	34	cDNA-588; gDNA-5715
Bru1 Ex 14 -F	CCAGAATCTAGCGGCCATT	61	30	IFM:28,30,32; TDT: 34,36,38; Abd-M: 32,34,36	268
Bru1 Ex 17-R	TTCAATCTGCTTTCCCGC
Bru1 Ex12-F	TTTGAAGTCCACGGAGCC	63	40	34	cDMA-615; gDNA-775
Bru1 Ex14-R	AGCCGTGTTGGTCAGTTGGG
Bru1 Ex8-F	ACGAGACACGCCGCCCTGAAAGC
Bru1 Ex12-R	TCCGTGGACTTCAAATAGCTTGCG	70	30	34	cDNA-186
Bru1 Ex13-R	TTGCGTATCGGCGAACTTGACGACC	72	30	34	cDNA-360
Bru1 Ex19-R	CCTCTACTCGATGTGTCCGTTTAACCTT	70	60	34	cDNA-1260
Bru1 Ex21-R	TCAAGATGTGCAACGACAAATAGCC	68	90	34	full cDNA-2346
Bru1 Ex19-F	AAGGTTAAACGGACACATCGAGTAGAGG
Bru1 Ex20-R	GGCACAGATTTCATGTCTTTTTCTGC	67	20	34	gDNA-185
Bru1 Ex 14 -F	CCAGAATCTAGCGGCCATT	63	30	34	cDNA-536
Bru1 ex18-F	TGCTTCGGGTTTGTCTCCTTCGAC	65	20	34	gDNA-130
Bru1 Ex18-R	AGTAGGGCTTCGAGTCCTTG
Bru1 Ex20-R	GGCACAGATTTCATGTCTTTTTCTGC	67	30	34	cDNA-334
Bru1 Ex21-R	TCAAGATGTGCAACGACAAATAGCC	67	60	34	gDNA/cDNA-1263
salm_F	TCTCTGAAGCGAAGACGTGAGC	67	30	IFM: 28,30,32; TDT and Abd-M: 32,34,36	287
salm_R	AAGGCAAAGTCGTCAGCCATGC
Rbfox1 Ex7-F	ATGCAATCGTCGGGCACCTCC	65	40	IFM: 30,32,34; TDT: 32,34,36; Abd-M:32,34	349
Rbfox1 Ex7-R	AGCGGAACGGTATGTTGGAGAC
Mhc Ex17-F	GACGAACTCCTGAACGAAGC	63	90	32	IFM iso-1158; Tub iso-656
Mhc Ex19-R	TCAGGAGCAAGGTCGAATCT
exd Ex6-F	TGAGCATTCCGACTACCGTGC	64	40	IFM:32; TDT:36	356
exd Ex7-R	CTTCGGATGGATATGGGTTGC
RpL32_F	GGTATCgacaacagagtgcg	Amplified at the respective Tm and cycle number of the target			114
RpL32_R	GAACTTCTTGAATCCGGTGGG
RpL32_F	TCCTACCAGCTTCAAGATGAC	Amplified at the respective Tm and cycle number of the target			500
RpL32_R	GTGTATTCCGACCACGTTACA
sls Ex9-F	CGCGCAGTATGTGCAAAAT	62	90	32	Tub. iso-1075; IFM iso-106
sls Ex11-R	AAACCGTTCCACGAAAAGTG
Zasp52-F	ATCGCTTCCGACGTTCTGAAG	64	60	32	TDT iso-800; IFM iso-572; Tub iso-398
Zasp52-R	GTCGCAGTAGAGCTTGTTGTTG
WupA Ex8-F	CGCTGAGTTCAACTTCCGCAACC	66	40	32	IFM iso-244; Tub iso-192
WupA Ex8-R	ATTGTTTAGGGCGGGAGTCACGG
Strn-Mlck isoR3'-F	GTTGGGTATCTACGATCTCACAGG	65	60	32	833
Strn-Mlck Ex6-R	CACGAAGGACATTACCCAATCGG
TM1 Ex27-F	TGAGTTCGCTGAACGCTCCG
TM1 Ex28-R	AATCGTGAATTGGAATGCGC	63	35	34	510
TM1 Ex30-R	AGGTGCTGGTGCTCCTTCTGCC	67	35	34	625
TM1 Ex31-R	AGTCGGCGGCTTAGGGTTGCG	67	35	34	ex13 incl-178; ex14 icnl -85
mys Ex5-F	TTGTCCGAGACCATGAAACGC
mys Ex8-R	TTGGGACTCAAGTGACACTCG	65	35	34	407
Rhea Ex12-F	CATGGAGCAACTAAATGTGG
Rhea ex15-R	ACAGAACTAATGCGAACTTCC	60	30	34	174
Rhea Ex17-F	GATTAACTGCACTAAGTTGGC
Rhea Ex18-R	ATTCTCATTGCTCTTCCCAGC	60	30	34	328
Rhea Ex19-R	GTAGTGAGGACACATTCAGC	60	30	34	104
Zasp66 Ex9-F	ATCGAGGACACCATCAGATCC
Zasp66 Ex12-R	ACTTCCTGTGGCGAGGATTGG	65	30	34	ex10 incl-206; ex10 excl-134
Zasp67 Ex7-F	ATAGATGCGATGCCAATGACCG
Zasp67 Ex2-R	ATGGGATTGACTTGAGATTCGGG	66	35	34	ex5 incl-621; ex3-4 incl-492
Zasp67 Ex6-R	AGAACCATCTTGGGCACAACGC	66	35	34	268
tn Ex1-F	AGGCGGTAATACATCGTACC	62	35	34	ex2 incl-591; ex2 excl-286
tn Ex4-F	AATCTAAACGACACCGTACCG	62	20	34	290
tn Ex5-R	AGCTTGGGAATCCTGTACC
tn ex7-F	AGCCTATCTGTCCCATTGTGC
tn Ex12-R	TGGCTTGTCGAATTGCTGCTGG	66	120	34	ex8 incl-1548; ex9 icnl-1584; ex10 icnl-2070;ex7-11-400
tn ex12-F	ACCAGCAGCACCACCAATACC
tn Ex16-R	ACCTGTTTAGGGATAGTACCTGCC	66	60	34	ex14 incl-1088; ex14 excl-809
fhos Ex5-F	CTCGCCCTACGACAACATTCC	60	30	34	473
fhos Ex8-F	ATGATTGTGAAAATGGAGCC	60	30	34	256
fhos Ex9-R	ATGACTCCAGATCCAAGTAGG
sals Ex5-F	CTATCAGAGCACCGCCGAGC
sals Ex3-R	CTGACCTCAGGCTCCAGTTCC	67	20	34	ex4 icnl-297; ex4 excl-189
wupA Ex11-F	CAGTCCCAGGAATCTCAGC
wupA Ex5-R	TCCTCCAGCGTGAACTCC	63	20	34	216
Bru1-DIV F (for antibody)	AAGTTCTGTTCCAGGGGCCCCAAAAAGAGAAGGAGCAG
Bru1-DIV R (for antibody)	CCCCAGAACATCAGGTTAATGGCGTTACCCACCTGGAAGCCGTTC
Bru1M2 sgRNA	tcggaatggagccaatagga
Bru1M2 sgRNA	AAATATGTGAGTTAGTTTGG
Bru1M2 homology arm L for	gtgtgtgtgtgggtttttgc
Bru1M2 homology arm L rev	tggtcgccttttAtagagaga
Bru1M2 homology arm R for	TGCGATTTGTAAAGGAAACG
Bru1M2 homology arm R rev	GCAAATCGCAAGTTTAGCAA
Bru1M2 out homology arm L for	gcacttgcagtttgcgataa	61	90	34	1936
SV40 terminator rev	gactagttgatcataatcagcca
dsRed_F	ccacaaggccctgaagctga	63	90	34	2461
Bru1M2 out homology arm R rev	GAATCTCGCCAGAACCAAGA

## Sheet: Sheet2
Primer name	Sequence 5’-3’	Tm	Elongation (in seconds)	cycle no.	Amplicon size (in base pairs)
